# Supplementary material for: Redox Proteomic Profile of Tirapazamine-Resistant Murine Hepatoma Cells
Source: Int J Mol Sci. 2023 Apr 6;24(7):6863. doi: 10.3390/ijms24076863 (PMC10094930; doi:10.3390/ijms24076863)
Supplement: Supplementary file 1 [file ijms-24-06863-s001.zip › ijms-2241447-supplementary (2).xlsx]

## Sheet: Table S1
Redox Proteomic Profile of Tirapazamine-Resistant Murine Hepatome Cells
Aušra Nemeikaitė-Čėnienė, Per Haberkant, Dalius Kučiauskas, Frank Stein, Narimantas Čėnas
Table S1
The data of proteomic analysis of TPZ-resistant MH22a cell subline
gene_name	protein_id	Uniprot accession	description	average.top3	logFC	fold change	reverse fold change	AveExpr	t	pvalue.limma	fdr.limma	B	pvalue.fdrtool	qval.fdrtool	lfdr.fdrtool	pvalue	fdr
Alpl	P09242	P09242	Alkaline phosphatase, tissue-nonspecific isozyme OS=Mus musculus GN=Alpl PE=1 SV=2	7.23813	3.26229	9.59501		24.0711	18.7473	4.01706e-06	0.000736986	5.34043	2.77145e-07	4.72254e-05	0.000439297	4.01706e-06	0.000736986
Col12a1	E9PX70|Q60847|Q60847-2|Q60847-5	E9PX70	Collagen alpha-1(XII) chain OS=Mus musculus GN=Col12a1 PE=1 SV=1|Collagen alpha-1(XII) chain OS=Mus musculus GN=Col12a1 PE=2 SV=3|Isoform 2 of Collagen alpha-1(XII) chain OS=Mus musculus GN=Col12a1|Isoform 5 of Collagen alpha-1(XII) chain OS=Mus musculus GN=Col12a1	7.4216	3.21366	9.277		27.0177	38.3931	8.60157e-08	0.000257434	8.64644	2.22045e-16	2.42418e-13	2.42418e-13	8.60157e-08	0.000257434
Hmgn2	A3KGL9|F6W687|P09602|Q5BL14|Q5XK38	A3KGL9	Non-histone chromosomal protein HMG-17 OS=Mus musculus GN=Hmgn2 PE=1 SV=1|Non-histone chromosomal protein HMG-17 (Fragment) OS=Mus musculus GN=Hmgn2 PE=1 SV=1|Non-histone chromosomal protein HMG-17 OS=Mus musculus GN=Hmgn2 PE=1 SV=2|High mobility group nucleosomal binding domain 2 OS=Mus musculus GN=Hmgn2 PE=1 SV=1|Hmgn2 protein OS=Mus musculus GN=Hmgn2 PE=1 SV=1	6.85797	2.61044	6.10691		24.506	8.23932	0.000294922	0.00411476	0.684366	0.0239282	0.30619	0.641541	0.000294922	0.00411476
Alcam	E9Q3Q6|E9Q4G8|Q54AJ5|Q61490	E9Q3Q6	CD166 antigen OS=Mus musculus GN=Alcam PE=1 SV=1|CD166 antigen OS=Mus musculus GN=Alcam PE=1 SV=1|CD166 antigen OS=Mus musculus GN=Alcam PE=1 SV=1|CD166 antigen OS=Mus musculus GN=Alcam PE=1 SV=3	6.45665	2.48515	5.59892		22.0241	26.7553	5.99258e-07	0.000423625	7.13283	2.24709e-13	1.5333e-10	4.13202e-09	5.99258e-07	0.000423625
4930502E18Rik	Q14BQ3	Q14BQ3	MCG8350 OS=Mus musculus GN=4930502E18Rik PE=1 SV=1	6.33419	2.38478	5.22264		21.6495	8.90302	0.000198988	0.00337256	1.12869	0.0146795	0.230333	0.641541	0.000198988	0.00337256
Aldh3a1	P47739	P47739	Aldehyde dehydrogenase, dimeric NADP-preferring OS=Mus musculus GN=Aldh3a1 PE=1 SV=2	7.99886	2.37264	5.17887		24.8473	24.6007	9.39977e-07	0.000423625	6.7325	1.5546e-11	6.63497e-09	2.51982e-08	9.39977e-07	0.000423625
Aldh1a1	P24549	P24549	Retinal dehydrogenase 1 OS=Mus musculus GN=Aldh1a1 PE=1 SV=5	7.65953	2.31203	4.96583		26.2705	29.2399	3.72043e-07	0.000360758	7.53795	1.11022e-15	1.01008e-12	6.10288e-10	3.72043e-07	0.000360758
Adh7	Q64437|Q9D748	Q64437	Alcohol dehydrogenase class 4 mu/sigma chain OS=Mus musculus GN=Adh7 PE=2 SV=2|Alcohol dehydrogenase 7 (Class IV), mu or sigma polypeptide OS=Mus musculus GN=Adh7 PE=1 SV=1	7.80237	2.26176	4.79576		24.9667	32.0919	2.25639e-07	0.000328192	7.94052	2.22045e-16	2.42418e-13	2.42418e-13	2.25639e-07	0.000328192
Eml1	D3Z4J9|D6RII3|Q05BC3|Q05BC3-2|Q05BC3-3	D3Z4J9	Echinoderm microtubule-associated protein-like 1 OS=Mus musculus GN=Eml1 PE=1 SV=1|Echinoderm microtubule-associated protein-like 1 OS=Mus musculus GN=Eml1 PE=1 SV=1|Echinoderm microtubule-associated protein-like 1 OS=Mus musculus GN=Eml1 PE=1 SV=1|Isoform 2 of Echinoderm microtubule-associated protein-like 1 OS=Mus musculus GN=Eml1|Isoform 3 of Echinoderm microtubule-associated protein-like 1 OS…	6.99468	2.19936	4.59275		24.7429	35.4191	1.32744e-07	0.000257434	8.34074	2.22045e-16	2.42418e-13	2.42418e-13	1.32744e-07	0.000257434
Des	P31001|Q3V1K9	P31001	Desmin OS=Mus musculus GN=Des PE=1 SV=3|Desmin OS=Mus musculus GN=Des PE=1 SV=1	7.93545	2.198	4.58842		26.6392	15.7139	1.0265e-05	0.00103019	4.37615	1.65516e-05	0.0015412	0.00878327	1.0265e-05	0.00103019
Arhgap18	Q8K0Q5	Q8K0Q5	Rho GTPase-activating protein 18 OS=Mus musculus GN=Arhgap18 PE=1 SV=1	6.94624	2.15896	4.46593		24.8759	22.5651	1.49275e-06	0.000452102	6.30476	6.21948e-10	1.78688e-07	1.1771e-06	1.49275e-06	0.000452102
Vnn1	Q9Z0K8	Q9Z0K8	Pantetheinase OS=Mus musculus GN=Vnn1 PE=1 SV=3	6.73824	2.10613	4.30535		23.4205	13.9763	1.90743e-05	0.00130558	3.71823	0.000127774	0.00812961	0.0518364	1.90743e-05	0.00130558
Hmgn1	D3Z607|P18608	P18608	Non-histone chromosomal protein HMG-14 OS=Mus musculus GN=Hmgn1 PE=1 SV=1|Non-histone chromosomal protein HMG-14 OS=Mus musculus GN=Hmgn1 PE=1 SV=2	7.19626	1.944	3.8477		23.6418	7.7133	0.000411067	0.00468327	0.308182	0.0345063	0.364619	0.641541	0.000411067	0.00468327
Pomp	A0A0J9YUI3|A0A0J9YVJ2|Q9CQT5	Q9CQT5	Proteasome maturation protein OS=Mus musculus GN=Pomp PE=1 SV=1|Proteasome maturation protein OS=Mus musculus GN=Pomp PE=1 SV=1|Proteasome maturation protein OS=Mus musculus GN=Pomp PE=1 SV=1	6.89794	1.89909	3.72978		23.8615	12.8827	2.92899e-05	0.00155975	3.25486	0.000414064	0.0205482	0.0669704	2.92899e-05	0.00155975
Igtp	Q9DCE9	Q9DCE9	Protein Igtp OS=Mus musculus GN=Igtp PE=1 SV=1	6.35079	1.8222	3.53619		23.6222	17.9472	5.06745e-06	0.000745619	5.10576	8.69517e-07	0.000120481	0.000439297	5.06745e-06	0.000745619
Akap12	Q9WTQ5|Q9WTQ5-2	Q9WTQ5	A-kinase anchor protein 12 OS=Mus musculus GN=Akap12 PE=1 SV=1|Isoform 2 of A-kinase anchor protein 12 OS=Mus musculus GN=Akap12	7.28992	1.82164	3.53482		26.2388	26.9554	5.75769e-07	0.000423625	7.16757	1.48992e-13	1.11067e-10	6.10288e-10	5.75769e-07	0.000423625
9030617O03Rik|Q8BH86|Q8BH86-2	E9QMK9|Q8BH86|Q8BH86-2	E9QMK9	Protein 9030617O03Rik OS=Mus musculus GN=9030617O03Rik PE=1 SV=1|UPF0317 protein C14orf159 homolog, mitochondrial OS=Mus musculus PE=1 SV=1|Isoform 2 of UPF0317 protein C14orf159 homolog, mitochondrial OS=Mus musculus	7.49726	1.80933	3.50479		24.7694	18.2353	4.65548e-06	0.000745619	5.19176	5.79132e-07	8.83362e-05	0.000439297	4.65548e-06	0.000745619
Aldh3b1	Q3TX25|Q80VQ0	Q3TX25	Aldehyde dehydrogenase OS=Mus musculus GN=Aldh3b1 PE=1 SV=1|Aldehyde dehydrogenase family 3 member B1 OS=Mus musculus GN=Aldh3b1 PE=1 SV=1	6.81666	1.7762	3.42522		22.1314	20.0613	2.79886e-06	0.000638065	5.69948	3.82988e-08	8.12818e-06	6.29525e-05	2.79886e-06	0.000638065
Aldh1a7	B2RTL5|O35945	B2RTL5	Aldehyde dehydrogenase family 1, subfamily A7 OS=Mus musculus GN=Aldh1a7 PE=1 SV=1|Aldehyde dehydrogenase, cytosolic 1 OS=Mus musculus GN=Aldh1a7 PE=1 SV=1	6.74644	1.77251	3.41647		23.735	26.0249	6.95172e-07	0.000423625	7.00263	9.81659e-13	5.95406e-10	9.19735e-09	6.95172e-07	0.000423625
Gclc	P97494|Q3TEF1	P97494	Glutamate--cysteine ligase catalytic subunit OS=Mus musculus GN=Gclc PE=1 SV=4|Glutamate--cysteine ligase catalytic subunit OS=Mus musculus GN=Gclc PE=1 SV=1	8.11222	1.76362	3.39549		26.0945	30.2734	3.08718e-07	0.000359224	7.69093	2.22045e-16	2.42418e-13	2.42418e-13	3.08718e-07	0.000359224
Ak1	Q9R0Y5|Q9R0Y5-2	Q9R0Y5	Adenylate kinase isoenzyme 1 OS=Mus musculus GN=Ak1 PE=1 SV=1|Isoform 2 of Adenylate kinase isoenzyme 1 OS=Mus musculus GN=Ak1	7.50149	1.76232	3.39244		25.3179	18.2617	4.61986e-06	0.000745619	5.19953	5.57859e-07	8.57246e-05	0.000439297	4.61986e-06	0.000745619
Cryab	P23927|Q52L78	P23927	Alpha-crystallin B chain OS=Mus musculus GN=Cryab PE=1 SV=2|Alpha-crystallin B chain OS=Mus musculus GN=Cryab PE=1 SV=1	7.81162	1.69391	3.23533		25.3993	18.292	4.57924e-06	0.000745619	5.20846	5.34291e-07	8.27854e-05	0.000439297	4.57924e-06	0.000745619
Ccdc80	Q8R2G6	Q8R2G6	Coiled-coil domain-containing protein 80 OS=Mus musculus GN=Ccdc80 PE=1 SV=2	6.28631	1.63352	3.10268		22.6756	22.0002	1.70956e-06	0.000452102	6.17639	1.64015e-09	4.06964e-07	2.88212e-05	1.70956e-06	0.000452102
Gja1	P23242	P23242	Gap junction alpha-1 protein OS=Mus musculus GN=Gja1 PE=1 SV=2	6.06557	1.58972	3.00992		21.6284	13.562	2.23531e-05	0.00141359	3.54755	0.000201493	0.0119022	0.0653209	2.23531e-05	0.00141359
Slc1a4	O35874|Q3UTP8	O35874	Neutral amino acid transporter A OS=Mus musculus GN=Slc1a4 PE=1 SV=1|Neutral amino acid transporter A OS=Mus musculus GN=Slc1a4 PE=1 SV=1	8.014	1.48145	2.7923		26.1032	25.5185	7.72413e-07	0.000423625	6.90913	2.66653e-12	1.4556e-09	2.51982e-08	7.72413e-07	0.000423625
Hmga1	P17095	P17095	High mobility group protein HMG-I/HMG-Y OS=Mus musculus GN=Hmga1 PE=1 SV=4	7.22856	1.47161	2.77331		25.3297	5.51049	0.00211061	0.0109033	-1.55295	0.130955	0.66555	1	0.00211061	0.0109033
Actg2	P63268|Q3UJ36	P63268	Actin, gamma-enteric smooth muscle OS=Mus musculus GN=Actg2 PE=1 SV=1|Actin, gamma 2, smooth muscle, enteric, isoform CRA_a OS=Mus musculus GN=Actg2 PE=1 SV=1	6.30932	1.46839	2.76712		22.6221	15.7564	1.0119e-05	0.00103019	4.39118	1.57014e-05	0.00147533	0.00878327	1.0119e-05	0.00103019
Gsto1	O09131	O09131	Glutathione S-transferase omega-1 OS=Mus musculus GN=Gsto1 PE=1 SV=2	8.41859	1.39426	2.62854		27.0231	19.3512	3.39232e-06	0.000657884	5.50934	1.13363e-07	2.06274e-05	0.000439297	3.39232e-06	0.000657884
Chn2	Q3V2R3	Q3V2R3	Beta-chimaerin OS=Mus musculus GN=Chn2 PE=1 SV=1	6.75222	1.39303	2.6263		24.5405	9.84247	0.000118964	0.00263315	1.70653	0.00698244	0.144605	0.361993	0.000118964	0.00263315
Hist1h1e	P43274	P43274	Histone H1.4 OS=Mus musculus GN=Hist1h1e PE=1 SV=2	8.55784	1.39033	2.62138		26.597	5.76675	0.00170319	0.00972438	-1.30884	0.113973	0.633959	1	0.00170319	0.00972438
Cbr3	Q8K354	Q8K354	Carbonyl reductase [NADPH] 3 OS=Mus musculus GN=Cbr3 PE=1 SV=1	8.21656	1.38987	2.62055		26.6135	24.9719	8.67479e-07	0.000423625	6.80508	7.67675e-12	3.78026e-09	2.51982e-08	8.67479e-07	0.000423625
Eng	F7A1B4|Q3UAM9|Q63961	F7A1B4	Endoglin OS=Mus musculus GN=Eng PE=1 SV=1|Endoglin OS=Mus musculus GN=Eng PE=1 SV=1|Endoglin OS=Mus musculus GN=Eng PE=1 SV=2	7.7173	1.37389	2.59168		25.6994	10.8489	7.18826e-05	0.00224166	2.26811	0.00294392	0.0838725	0.210038	7.18826e-05	0.00224166
Ampd3	O08739	O08739	AMP deaminase 3 OS=Mus musculus GN=Ampd3 PE=1 SV=2	8.06605	1.36983	2.5844		26.9252	18.1449	4.78043e-06	0.000745619	5.16494	6.58389e-07	9.77358e-05	0.000439297	4.78043e-06	0.000745619
Gstm5	E9PVM7|P48774	E9PVM7	Glutathione S-transferase Mu 5 (Fragment) OS=Mus musculus GN=Gstm5 PE=1 SV=1|Glutathione S-transferase Mu 5 OS=Mus musculus GN=Gstm5 PE=1 SV=1	6.49839	1.36248	2.57127		23.3332	19.9167	2.90909e-06	0.000638065	5.66147	4.79162e-08	9.84992e-06	6.29525e-05	2.90909e-06	0.000638065
Dppa4	Q8CCG4	Q8CCG4	Developmental pluripotency-associated protein 4 OS=Mus musculus GN=Dppa4 PE=1 SV=2	7.00949	1.3622	2.57077		25.0108	11.0233	6.61655e-05	0.00220534	2.36001	0.00251673	0.076112	0.210038	6.61655e-05	0.00220534
Hist1h1d	P43277|Q149Z9	P43277	Histone H1.3 OS=Mus musculus GN=Hist1h1d PE=1 SV=2|Histone H1.3 OS=Mus musculus GN=Hist1h1d PE=1 SV=1	8.25263	1.35034	2.54972		26.1822	4.79892	0.00398803	0.0163759	-2.27599	0.188403	0.741133	1	0.00398803	0.0163759
Cbs	Q91WT9|Q91WT9-2	Q91WT9	Cystathionine beta-synthase OS=Mus musculus GN=Cbs PE=1 SV=3|Isoform 2 of Cystathionine beta-synthase OS=Mus musculus GN=Cbs	6.99878	1.34905	2.54744		24.1928	14.1044	1.81781e-05	0.00125905	3.76984	0.000110718	0.00719507	0.0518364	1.81781e-05	0.00125905
Abcb1a	P21447	P21447	Multidrug resistance protein 1A OS=Mus musculus GN=Abcb1a PE=1 SV=3	6.50365	1.34758	2.54485		23.2229	10.2497	9.64993e-05	0.00247327	1.9404	0.00496503	0.116241	0.361993	9.64993e-05	0.00247327
Snx3	O70492|Q78ZM0	O70492	Sorting nexin-3 OS=Mus musculus GN=Snx3 PE=1 SV=3|Sorting nexin 3 OS=Mus musculus GN=Snx3 PE=1 SV=1	7.28035	1.33038	2.51468		23.1972	8.02912	0.000336007	0.00431543	0.536724	0.0277596	0.329999	0.641541	0.000336007	0.00431543
Txnip	Q8BG60|Q8BG60-2	Q8BG60	Thioredoxin-interacting protein OS=Mus musculus GN=Txnip PE=1 SV=1|Isoform 2 of Thioredoxin-interacting protein OS=Mus musculus GN=Txnip	7.62902	1.28687	2.43998		25.2109	1.91758	0.108992	0.177673	-5.89873	0.599179	0.90104	1	0.108992	0.177673
Adh1	P00329|Q3UKA4	P00329	Alcohol dehydrogenase 1 OS=Mus musculus GN=Adh1 PE=1 SV=2|Alcohol dehydrogenase 1 OS=Mus musculus GN=Adh1 PE=1 SV=1	6.74623	1.28191	2.4316		23.7332	10.5972	8.11975e-05	0.00225889	2.13272	0.00367798	0.0952972	0.210038	8.11975e-05	0.00225889
Slc22a23	F7BP73|Q3UHH2	F7BP73	Solute carrier family 22 member 23 (Fragment) OS=Mus musculus GN=Slc22a23 PE=1 SV=1|Solute carrier family 22 member 23 OS=Mus musculus GN=Slc22a23 PE=2 SV=1	6.89179	1.27721	2.4237		24.257	22.1667	1.64199e-06	0.000452102	6.2147	1.23538e-09	3.21126e-07	2.20957e-06	1.64199e-06	0.000452102
Mt2	P02798	P02798	Metallothionein-2 OS=Mus musculus GN=Mt2 PE=1 SV=2	6.21258	1.26912	2.41015		22.4356	9.59472	0.000135644	0.00275816	1.55952	0.00854412	0.162435	0.361993	0.000135644	0.00275816
Atpif1	E9PV44|O35143	E9PV44	ATPase inhibitor, mitochondrial OS=Mus musculus GN=Atpif1 PE=1 SV=1|ATPase inhibitor, mitochondrial OS=Mus musculus GN=Atpif1 PE=1 SV=2	7.93944	1.25983	2.39468		26.585	7.3143	0.00053584	0.00523552	0.00724466	0.0449901	0.410517	0.783346	0.00053584	0.00523552
Gstm1	P10649	P10649	Glutathione S-transferase Mu 1 OS=Mus musculus GN=Gstm1 PE=1 SV=2	8.32245	1.25322	2.38374		26.5121	22.3931	1.55511e-06	0.000452102	6.26615	8.37582e-10	2.28609e-07	2.17146e-06	1.55511e-06	0.000452102
Ahr	P30561	P30561	Aryl hydrocarbon receptor OS=Mus musculus GN=Ahr PE=1 SV=3	7.28565	1.24848	2.37591		24.6157	21.1352	2.11846e-06	0.000535879	5.97086	6.91994e-09	1.64236e-06	6.29525e-05	2.11846e-06	0.000535879
Acyp2	P56375	P56375	Acylphosphatase-2 OS=Mus musculus GN=Acyp2 PE=1 SV=2	7.15116	1.2423	2.36576		23.5073	17.6691	5.5067e-06	0.000761478	5.02109	1.27997e-06	0.00016561	0.000901939	5.5067e-06	0.000761478
Styk1	Q6J9G1	Q6J9G1	Tyrosine-protein kinase STYK1 OS=Mus musculus GN=Styk1 PE=2 SV=2	6.30737	1.24156	2.36454		21.5384	22.5729	1.48996e-06	0.000452102	6.30651	6.13499e-10	1.76751e-07	8.74176e-07	1.48996e-06	0.000452102
Abcc3	B2RX12|B2RX12-2|B2RX12-3	B2RX12	Canalicular multispecific organic anion transporter 2 OS=Mus musculus GN=Abcc3 PE=1 SV=1|Isoform 2 of Canalicular multispecific organic anion transporter 2 OS=Mus musculus GN=Abcc3|Isoform 3 of Canalicular multispecific organic anion transporter 2 OS=Mus musculus GN=Abcc3	6.48215	1.2394	2.361		22.3296	13.5625	2.2348e-05	0.00141359	3.5478	0.000201364	0.011896	0.0653209	2.2348e-05	0.00141359
Golm1	Q91XA2	Q91XA2	Golgi membrane protein 1 OS=Mus musculus GN=Golm1 PE=1 SV=2	7.32526	1.19402	2.2879		25.3765	17.5969	5.62798e-06	0.000761478	4.99884	1.4138e-06	0.000179479	0.00327594	5.62798e-06	0.000761478
Entpd5	Q3TQC7|Q9WUZ9	Q3TQC7	Ectonucleoside triphosphate diphosphohydrolase 5 OS=Mus musculus GN=Entpd5 PE=1 SV=1|Ectonucleoside triphosphate diphosphohydrolase 5 OS=Mus musculus GN=Entpd5 PE=1 SV=1	7.94356	1.18389	2.27189		25.384	14.7405	1.44003e-05	0.00110884	4.01852	5.34168e-05	0.00385465	0.0136427	1.44003e-05	0.00110884
Serf2	P84102	P84102	Small EDRK-rich factor 2 OS=Mus musculus GN=Serf2 PE=1 SV=1	6.98909	1.18377	2.2717		22.9264	4.64077	0.00463446	0.0180236	-2.44625	0.203384	0.755539	1	0.00463446	0.0180236
Ugdh	O70475|Q3TS38	O70475	UDP-glucose 6-dehydrogenase OS=Mus musculus GN=Ugdh PE=1 SV=1|UDP-glucose 6-dehydrogenase OS=Mus musculus GN=Ugdh PE=1 SV=1	6.65203	1.17499	2.25791		22.9293	3.99284	0.00889603	0.0282517	-3.18231	0.273788	0.806219	1	0.00889603	0.0282517
Irf2bpl	Q8K3X4	Q8K3X4	Interferon regulatory factor 2-binding protein-like OS=Mus musculus GN=Irf2bpl PE=1 SV=1	7.22243	1.17278	2.25445		24.9558	19.47	3.28338e-06	0.000657884	5.54177	9.47869e-08	1.77954e-05	0.000109746	3.28338e-06	0.000657884
Irgm1	Q60766|Q60766-2	Q60766	Immunity-related GTPase family M protein 1 OS=Mus musculus GN=Irgm1 PE=1 SV=1|Isoform 2 of Immunity-related GTPase family M protein 1 OS=Mus musculus GN=Irgm1	7.32077	1.13627	2.19812		25.0095	15.4069	1.13961e-05	0.00108221	4.2662	2.41277e-05	0.00210529	0.0114333	1.13961e-05	0.00108221
Ftl1	P29391|Q9CPX4	P29391	Ferritin light chain 1 OS=Mus musculus GN=Ftl1 PE=1 SV=2|Ferritin OS=Mus musculus GN=Ftl1 PE=1 SV=1	7.15825	1.12648	2.18326		24.7919	16.9745	6.81557e-06	0.000862022	4.8023	3.27991e-06	0.000389223	0.00397907	6.81557e-06	0.000862022
Apoe	P08226|Q3TXU4	P08226	Apolipoprotein E OS=Mus musculus GN=Apoe PE=1 SV=2|Apolipoprotein E OS=Mus musculus GN=Apoe PE=1 SV=1	6.91209	1.1206	2.17437		24.5404	11.0058	6.67137e-05	0.00220534	2.35086	0.00255684	0.0768811	0.210038	6.67137e-05	0.00220534
Mvp	E9Q3X0|Q9EQK5	E9Q3X0	Major vault protein OS=Mus musculus GN=Mvp PE=1 SV=1|Major vault protein OS=Mus musculus GN=Mvp PE=1 SV=4	6.93913	1.10725	2.15434		24.5465	11.6634	4.93024e-05	0.00192511	2.68499	0.00138969	0.0501689	0.210038	4.93024e-05	0.00192511
Icam1	P13597|P13597-2	P13597	Intercellular adhesion molecule 1 OS=Mus musculus GN=Icam1 PE=1 SV=1|Isoform 2 of Intercellular adhesion molecule 1 OS=Mus musculus GN=Icam1	7.16566	1.10383	2.14925		24.7059	17.1349	6.48317e-06	0.000838202	4.8538	2.64734e-06	0.000321133	0.00345536	6.48317e-06	0.000838202
Pafah2	E9QNW6|Q8VDG7	E9QNW6	Platelet-activating factor acetylhydrolase 2, cytoplasmic OS=Mus musculus GN=Pafah2 PE=1 SV=1|Platelet-activating factor acetylhydrolase 2, cytoplasmic OS=Mus musculus GN=Pafah2 PE=1 SV=2	6.40924	1.09956	2.1429		22.9522	2.89911	0.0309068	0.0689214	-4.5646	0.426844	0.866423	1	0.0309068	0.0689214
Anxa1	P10107|Q4FJV4	P10107	Annexin A1 OS=Mus musculus GN=Anxa1 PE=1 SV=2|Annexin OS=Mus musculus GN=Anxa1 PE=1 SV=1	8.3949	1.09865	2.14155		27.2733	16.5569	7.77962e-06	0.000944278	4.66546	5.67845e-06	0.000628871	0.00397907	7.77962e-06	0.000944278
Abhd4	Q3U7M5|Q8C0M2|Q8VD66	Q3U7M5	Protein ABHD4 OS=Mus musculus GN=Abhd4 PE=1 SV=1|Protein ABHD4 OS=Mus musculus GN=Abhd4 PE=1 SV=1|Protein ABHD4 OS=Mus musculus GN=Abhd4 PE=1 SV=1	7.44088	1.08857	2.12663		25.164	15.1346	1.25242e-05	0.00109558	4.16654	3.3512e-05	0.00272871	0.0114333	1.25242e-05	0.00109558
Snx10	D3YW62|Q4FJX6|Q9CWT3	D3YW62	Sorting nexin-10 (Fragment) OS=Mus musculus GN=Snx10 PE=1 SV=1|Snx10 protein OS=Mus musculus GN=Snx10 PE=1 SV=1|Sorting nexin-10 OS=Mus musculus GN=Snx10 PE=1 SV=1	6.45127	1.07216	2.10258		23.0967	8.94018	0.000194803	0.00334325	1.15264	0.0142707	0.22618	0.641541	0.000194803	0.00334325
Elfn2	Q68FM6	Q68FM6	Protein phosphatase 1 regulatory subunit 29 OS=Mus musculus GN=Elfn2 PE=1 SV=1	6.43231	1.07214	2.10255		22.7335	14.9542	1.33446e-05	0.00109558	4.09936	4.154e-05	0.00319946	0.0114333	1.33446e-05	0.00109558
Mcam	Q8R2Y2	Q8R2Y2	Cell surface glycoprotein MUC18 OS=Mus musculus GN=Mcam PE=1 SV=1	7.08399	1.05714	2.0808		24.5893	8.49284	0.000252957	0.00386275	0.857899	0.0199245	0.277085	0.641541	0.000252957	0.00386275
Nlrp4f	L7N1W9|Q66X05	L7N1W9	NACHT, LRR and PYD domains-containing protein 4F OS=Mus musculus GN=Nlrp4f PE=4 SV=1|NACHT, LRR and PYD domains-containing protein 4F OS=Mus musculus GN=Nlrp4f PE=2 SV=1	6.98335	1.05324	2.07518		22.5897	10.9177	6.95609e-05	0.00220638	2.30453	0.00276811	0.0807902	0.210038	6.95609e-05	0.00220638
Sik2	F8VPT7|H3BJC9|H3BKG1|Q8CFH6	F8VPT7	Serine/threonine-protein kinase SIK2 OS=Mus musculus GN=Sik2 PE=1 SV=1|Serine/threonine-protein kinase SIK2 OS=Mus musculus GN=Sik2 PE=1 SV=1|Serine/threonine-protein kinase SIK2 OS=Mus musculus GN=Sik2 PE=1 SV=1|Serine/threonine-protein kinase SIK2 OS=Mus musculus GN=Sik2 PE=1 SV=1	6.56255	1.0503	2.07096		22.2906	9.39889	0.000150797	0.00287652	1.44066	0.00999213	0.178044	0.427881	0.000150797	0.00287652
Trim12c	E9Q987	D3Z3L3	Protein Trim12c OS=Mus musculus GN=Trim12c PE=1 SV=1	7.05522	1.04659	2.06565		24.9279	17.3377	6.09006e-06	0.000805273	4.91805	2.01392e-06	0.000249853	0.00345536	6.09006e-06	0.000805273
Ifi47	Q61635	Q61635	GTP-binding protein OS=Mus musculus GN=Ifi47 PE=1 SV=1	6.70943	1.0447	2.06294		23.7838	8.31737	0.000281188	0.00400968	0.738308	0.0226271	0.297256	0.641541	0.000281188	0.00400968
Slco2a1	Q9EPT5	Q9EPT5	Solute carrier organic anion transporter family member 2A1 OS=Mus musculus GN=Slco2a1 PE=1 SV=2	6.43216	1.0389	2.05466		22.3728	11.3878	5.58547e-05	0.00209653	2.54739	0.00180095	0.0607234	0.210038	5.58547e-05	0.00209653
Ephx1	E9PWK1|Q9D379	E9PWK1	Epoxide hydrolase 1 OS=Mus musculus GN=Ephx1 PE=1 SV=1|Epoxide hydrolase 1 OS=Mus musculus GN=Ephx1 PE=1 SV=2	8.53125	1.02342	2.03274		27.2975	15.1868	1.22983e-05	0.00109558	4.18579	3.14813e-05	0.00260097	0.0114333	1.22983e-05	0.00109558
Gbe1	Q9D6Y9	Q9D6Y9	1,4-alpha-glucan-branching enzyme OS=Mus musculus GN=Gbe1 PE=1 SV=1	8.50889	1.01588	2.02214		27.2839	15.6122	1.06242e-05	0.00103019	4.34003	1.87655e-05	0.00170727	0.0114333	1.06242e-05	0.00103019
Ptms	Q9D0J8	Q9D0J8	Parathymosin OS=Mus musculus GN=Ptms PE=1 SV=3	7.93153	1.01398	2.01947		25.8402	8.69947	0.000223873	0.00361295	0.995809	0.0171069	0.253378	0.641541	0.000223873	0.00361295
Cat	P24270	P24270	Catalase OS=Mus musculus GN=Cat PE=1 SV=4	8.8405	1.00322	2.00447		27.9243	15.7218	1.02378e-05	0.00103019	4.37893	1.63911e-05	0.00152886	0.00878327	1.02378e-05	0.00103019
Hspa1b|Hspa1a	P17879|Q3TU85|Q61696	P17879	Heat shock 70 kDa protein 1B OS=Mus musculus GN=Hspa1b PE=1 SV=3|Heat shock 70 kDa protein 1A OS=Mus musculus GN=Hspa1b PE=1 SV=1|Heat shock 70 kDa protein 1A OS=Mus musculus GN=Hspa1a PE=1 SV=2	7.14395	0.993126	1.99049		25.3779	9.59923	0.000135316	0.00275816	1.56223	0.0085131	0.162109	0.361993	0.000135316	0.00275816
Gsta4	P24472	P24472	Glutathione S-transferase A4 OS=Mus musculus GN=Gsta4 PE=1 SV=3	8.11786	0.991991	1.98893		25.3564	9.56277	0.00013799	0.00276836	1.54029	0.00876676	0.164741	0.361993	0.00013799	0.00276836
Tk1	P04184	P04184	Thymidine kinase, cytosolic OS=Mus musculus GN=Tk1 PE=1 SV=3	6.77112	0.987431	1.98265		24.4229	5.16827	0.002844	0.0132371	-1.89213	0.156615	0.704135	1	0.002844	0.0132371
Aspm	Q8CJ27	Q8CJ27	Abnormal spindle-like microcephaly-associated protein homolog OS=Mus musculus GN=Aspm PE=2 SV=2	6.93172	0.971806	1.96129		25.3085	11.7932	4.65333e-05	0.0018417	2.7486	0.00122773	0.0455912	0.210038	4.65333e-05	0.0018417
Cyr61	P18406|Q3TX21	P18406	Protein CYR61 OS=Mus musculus GN=Cyr61 PE=1 SV=1|Cysteine rich protein 61 OS=Mus musculus GN=Cyr61 PE=1 SV=1	6.89272	0.970333	1.95929		23.7161	4.29609	0.00650692	0.0228193	-2.83	0.238997	0.784101	1	0.00650692	0.0228193
Dzip3	E9QNZ2|Q7TPV2|Q7TPV2-2	E9QNZ2	E3 ubiquitin-protein ligase DZIP3 OS=Mus musculus GN=Dzip3 PE=1 SV=1|E3 ubiquitin-protein ligase DZIP3 OS=Mus musculus GN=Dzip3 PE=1 SV=2|Isoform 2 of E3 ubiquitin-protein ligase DZIP3 OS=Mus musculus GN=Dzip3	7.53878	0.970184	1.95909		26.9039	17.9668	5.03815e-06	0.000745619	5.11165	8.46014e-07	0.0001181	0.000439297	5.03815e-06	0.000745619
Cd47	Q61735-2	Q61735	Isoform 2 of Leukocyte surface antigen CD47 OS=Mus musculus GN=Cd47	7.29884	0.954753	1.93825		23.6537	16.1893	8.76435e-06	0.000944278	4.5415	9.11136e-06	0.000921053	0.00878327	8.76435e-06	0.000944278
Mpp1	B7ZCL8|P70290|Q542P4	B7ZCL8	55 kDa erythrocyte membrane protein OS=Mus musculus GN=Mpp1 PE=1 SV=1|55 kDa erythrocyte membrane protein OS=Mus musculus GN=Mpp1 PE=1 SV=1|55 kDa erythrocyte membrane protein OS=Mus musculus GN=Mpp1 PE=1 SV=1	7.7727	0.950691	1.9328		26.2161	16.2572	8.57194e-06	0.000944278	4.56463	8.35587e-06	0.000861211	0.00397907	8.57194e-06	0.000944278
Slc4a2	A0A0R4J101|A0A0R4J1K4|A0A0R4J1K9|P13808|P13808-2|P13808-3	P13808	Anion exchange protein OS=Mus musculus GN=Slc4a2 PE=1 SV=1|Anion exchange protein OS=Mus musculus GN=Slc4a2 PE=1 SV=1|Anion exchange protein OS=Mus musculus GN=Slc4a2 PE=1 SV=1|Anion exchange protein 2 OS=Mus musculus GN=Slc4a2 PE=1 SV=1|Isoform B1 of Anion exchange protein 2 OS=Mus musculus GN=Slc4a2|Isoform B2 of Anion exchange protein 2 OS=Mus musculus GN=Slc4a2	7.02237	0.948464	1.92982		24.9291	14.6878	1.46752e-05	0.00110884	3.99841	5.68e-05	0.00402673	0.0415418	1.46752e-05	0.00110884
Sept5	Q9Z2Q6	Q9Z2Q6	Septin-5 OS=Mus musculus GN=Sept5 PE=1 SV=2	6.83855	0.946584	1.9273		24.4408	8.72378	0.000220717	0.00361295	1.01183	0.0167997	0.250605	0.641541	0.000220717	0.00361295
Meaf6	Q2VPQ9|Q2VPQ9-2|V9GX42	Q2VPQ9	Chromatin modification-related protein MEAF6 OS=Mus musculus GN=Meaf6 PE=1 SV=1|Isoform 2 of Chromatin modification-related protein MEAF6 OS=Mus musculus GN=Meaf6|Chromatin modification-related protein MEAF6 OS=Mus musculus GN=Meaf6 PE=1 SV=1	7.21923	0.936798	1.91427		24.6175	5.02907	0.00322388	0.0142744	-2.03457	0.168081	0.718639	1	0.00322388	0.0142744
Ulk1	A0A0R4J0B3|O70405|Q6PB82	O70405	Serine/threonine-protein kinase ULK1 OS=Mus musculus GN=Ulk1 PE=1 SV=1|Serine/threonine-protein kinase ULK1 OS=Mus musculus GN=Ulk1 PE=1 SV=1|Serine/threonine-protein kinase ULK1 OS=Mus musculus GN=Ulk1 PE=1 SV=1	6.07063	0.921302	1.89382		20.2437	6.81613	0.00075933	0.00622348	-0.389126	0.0617336	0.484032	1	0.00075933	0.00622348
Hspa13	Q8BM72	Q8BM72	Heat shock 70 kDa protein 13 OS=Mus musculus GN=Hspa13 PE=1 SV=1	6.85454	0.916586	1.88764		24.0592	12.6223	3.26033e-05	0.00159347	3.13819	0.000540975	0.0246995	0.0749748	3.26033e-05	0.00159347
Ago1	Q8CJG1	Q8CJG1	Protein argonaute-1 OS=Mus musculus GN=Ago1 PE=1 SV=2	6.35093	0.91557	1.88631		23.2059	11.2363	5.98909e-05	0.00215317	2.47029	0.00207196	0.0669487	0.210038	5.98909e-05	0.00215317
Nusap1	Q9ERH4	Q9ERH4	Nucleolar and spindle-associated protein 1 OS=Mus musculus GN=Nusap1 PE=1 SV=1	6.96175	0.915119	1.88573		24.257	14.9814	1.32169e-05	0.00109558	4.10955	4.02227e-05	0.00312574	0.0114333	1.32169e-05	0.00109558
Usp25	P57080	P57080	Ubiquitin carboxyl-terminal hydrolase 25 OS=Mus musculus GN=Usp25 PE=1 SV=2	6.84351	0.909523	1.87842		24.1136	14.3696	1.64754e-05	0.00119884	3.87506	8.19872e-05	0.0055728	0.0415418	1.64754e-05	0.00119884
Naaa	G3XA18|Q9D7V9	G3XA18	N-acylethanolamine-hydrolyzing acid amidase OS=Mus musculus GN=Naaa PE=1 SV=1|N-acylethanolamine-hydrolyzing acid amidase OS=Mus musculus GN=Naaa PE=1 SV=2	6.33321	0.890701	1.85408		22.6638	9.87728	0.000116819	0.00261341	1.72689	0.00678491	0.142121	0.361993	0.000116819	0.00261341
Hist1h1b	P43276	P43276	Histone H1.5 OS=Mus musculus GN=Hist1h1b PE=1 SV=2	8.06444	0.885954	1.84799		26.3393	3.87401	0.0100938	0.0308919	-3.32416	0.288321	0.814173	1	0.0100938	0.0308919
Anpep	P97449	P97449	Aminopeptidase N OS=Mus musculus GN=Anpep PE=1 SV=4	6.90198	0.881445	1.84222		24.6377	7.04226	0.000646558	0.00574301	-0.206249	0.0535842	0.448813	1	0.000646558	0.00574301
Pbxip1	Q3TVI8	Q3TVI8	Pre-B-cell leukemia transcription factor-interacting protein 1 OS=Mus musculus GN=Pbxip1 PE=1 SV=2	6.42367	0.867287	1.82423		22.8761	12.7676	3.07027e-05	0.00156691	3.20362	0.00046627	0.0223033	0.0749748	3.07027e-05	0.00156691
Nucb1	Q02819	Q02819	Nucleobindin-1 OS=Mus musculus GN=Nucb1 PE=1 SV=2	7.16493	0.865621	1.82212		26.1364	9.42055	0.000149027	0.00287099	1.45393	0.00982188	0.17626	0.427881	0.000149027	0.00287099
Gcnt2	Q7TPQ8	Q7TPQ8	Glucosaminyl (N-acetyl) transferase 2, I-branching enzyme OS=Mus musculus GN=Gcnt2 PE=1 SV=1	6.22448	0.862157	1.81775		22.6935	6.76314	0.000788983	0.00630536	-0.432715	0.0637848	0.492199	1	0.000788983	0.00630536
Sfn	O70456	O70456	14-3-3 protein sigma OS=Mus musculus GN=Sfn PE=1 SV=2	7.08107	0.86136	1.81675		25.3719	6.31969	0.00109805	0.00764949	-0.808991	0.0832492	0.55851	1	0.00109805	0.00764949
Khk	A0A0J9YU79|A0A0J9YUK6|E9Q1Q9|P97328	P97328	Ketohexokinase OS=Mus musculus GN=Khk PE=1 SV=1|Ketohexokinase (Fragment) OS=Mus musculus GN=Khk PE=1 SV=1|Ketohexokinase OS=Mus musculus GN=Khk PE=1 SV=1|Ketohexokinase OS=Mus musculus GN=Khk PE=1 SV=1	6.80257	0.854737	1.80843		25.0931	10.5196	8.43519e-05	0.00225889	2.09032	0.00393583	0.0988344	0.210038	8.43519e-05	0.00225889
Tor4a	Q8BH02	Q8BH02	Torsin-4A OS=Mus musculus GN=Tor4a PE=2 SV=1	6.12338	0.853133	1.80642		21.8821	13.5863	2.21427e-05	0.00141359	3.55775	0.000196232	0.0116469	0.0653209	2.21427e-05	0.00141359
Cib1	A0A0U1RPF3|Q9Z0F4	Q9Z0F4	Calcium and integrin binding 1 (Calmyrin), isoform CRA_a OS=Mus musculus GN=Cib1 PE=1 SV=1|Calcium and integrin-binding protein 1 OS=Mus musculus GN=Cib1 PE=1 SV=3	7.16197	0.847598	1.7995		23.7206	14.9489	1.33699e-05	0.00109558	4.09735	4.18047e-05	0.00321412	0.0136427	1.33699e-05	0.00109558
Dnajb4	Q9D832	Q9D832	DnaJ homolog subfamily B member 4 OS=Mus musculus GN=Dnajb4 PE=1 SV=1	8.02455	0.845655	1.79708		25.9866	9.7477	0.000125042	0.0026777	1.65073	0.00754664	0.151403	0.361993	0.000125042	0.0026777
Eif4a2	P10630|P10630-2	P10630	Eukaryotic initiation factor 4A-II OS=Mus musculus GN=Eif4a2 PE=1 SV=2|Isoform 2 of Eukaryotic initiation factor 4A-II OS=Mus musculus GN=Eif4a2	7.23484	0.841201	1.79154		23.9628	9.67776	0.000129763	0.00272921	1.6092	0.00798896	0.156442	0.361993	0.000129763	0.00272921
Enah	A0A0A6YW06|A0A0A6YXC8|E9QKQ9|E9QKR1|E9QLZ9|J3QNM3|Q03173|Q03173-3|Q03173-4|Q03173-5|Q03173-6	Q03173	Protein enabled homolog OS=Mus musculus GN=Enah PE=1 SV=1|Protein enabled homolog OS=Mus musculus GN=Enah PE=1 SV=1|Protein enabled homolog OS=Mus musculus GN=Enah PE=1 SV=1|Protein enabled homolog OS=Mus musculus GN=Enah PE=1 SV=2|Protein enabled homolog OS=Mus musculus GN=Enah PE=1 SV=1|Protein enabled homolog OS=Mus musculus GN=Enah PE=1 SV=1|Protein enabled homolog OS=Mus musculus GN=Enah PE=…	7.01048	0.840348	1.79048		24.8195	14.1683	1.77499e-05	0.0012442	3.79538	0.00010304	0.00677414	0.0433089	1.77499e-05	0.0012442
Zfp217	Q3U0X6	Q3U0X6	Protein Zfp217 OS=Mus musculus GN=Zfp217 PE=1 SV=1	6.56077	0.834377	1.78309		23.8672	5.52873	0.00207814	0.0108145	-1.53531	0.129685	0.663378	1	0.00207814	0.0108145
Tpm1	F8WID5|G5E8R1|Q8BP43|Q8BSH3	F8WID5	Tropomyosin alpha-1 chain OS=Mus musculus GN=Tpm1 PE=1 SV=1|Tropomyosin 1, alpha, isoform CRA_j OS=Mus musculus GN=Tpm1 PE=1 SV=1|Tropomyosin 1, alpha, isoform CRA_c OS=Mus musculus GN=Tpm1 PE=1 SV=1|Tropomyosin alpha-1 chain OS=Mus musculus GN=Tpm1 PE=1 SV=1	7.87371	0.831717	1.7798		26.482	5.8691	0.00156653	0.00924348	-1.21361	0.107696	0.620716	1	0.00156653	0.00924348
Gch1	Q05915|Q3U7P6	Q05915	GTP cyclohydrolase 1 OS=Mus musculus GN=Gch1 PE=1 SV=1|GTP cyclohydrolase 1 OS=Mus musculus GN=Gch1 PE=1 SV=1	6.50006	0.83036	1.77813		23.2845	12.0491	4.15933e-05	0.00175355	2.87187	0.00095832	0.0377201	0.176889	4.15933e-05	0.00175355
Pde2a	Q3TXZ6|Q5PR72|Q922S4	Q922S4	Phosphodiesterase OS=Mus musculus GN=Pde2a PE=1 SV=1|Phosphodiesterase OS=Mus musculus GN=Pde2a PE=1 SV=1|cGMP-dependent 3',5'-cyclic phosphodiesterase OS=Mus musculus GN=Pde2a PE=1 SV=3	7.02169	0.828681	1.77606		24.3115	13.2269	2.54991e-05	0.00150241	3.40524	0.000288632	0.0158042	0.0653209	2.54991e-05	0.00150241
Trim34a	E9PYZ4|Q99PP6|Q99PP6-2|Q99PP6-3	E9PYZ4	Tripartite motif-containing protein 34A OS=Mus musculus GN=Trim34a PE=1 SV=2|Tripartite motif-containing protein 34A OS=Mus musculus GN=Trim34a PE=2 SV=2|Isoform Beta of Tripartite motif-containing protein 34A OS=Mus musculus GN=Trim34a|Isoform Gamma of Tripartite motif-containing protein 34A OS=Mus musculus GN=Trim34a	6.38729	0.826883	1.77385		23.5657	7.23731	0.000564755	0.0053601	-0.0524735	0.0472956	0.420438	0.811024	0.000564755	0.0053601
Oxr1	E9Q0A7|Q4KMM3-4	E9Q0A7	Oxidation resistance protein 1 OS=Mus musculus GN=Oxr1 PE=1 SV=1|Isoform 4 of Oxidation resistance protein 1 OS=Mus musculus GN=Oxr1	7.18172	0.825112	1.77167		25.989	14.2415	1.72732e-05	0.00122555	3.82452	9.48505e-05	0.00631424	0.0433089	1.72732e-05	0.00122555
Mrvi1	G5E8V5|Q3UR44|Q9WUX5|Q9WUX5-2	G5E8V5	MRV integration site 1, isoform CRA_b OS=Mus musculus GN=Mrvi1 PE=1 SV=1|Protein MRVI1 (Fragment) OS=Mus musculus GN=Mrvi1 PE=1 SV=1|Protein MRVI1 OS=Mus musculus GN=Mrvi1 PE=1 SV=2|Isoform 2 of Protein MRVI1 OS=Mus musculus GN=Mrvi1	6.01613	0.824286	1.77066		22.858	10.6539	7.89809e-05	0.00225889	2.1635	0.00349944	0.0927131	0.210038	7.89809e-05	0.00225889
Ing4	Q8C0D7|Q8C0D7-2|Q8C0D7-3|Q8C0D7-4|Q8C0D7-5	Q8C0D7	Inhibitor of growth protein 4 OS=Mus musculus GN=Ing4 PE=1 SV=2|Isoform 2 of Inhibitor of growth protein 4 OS=Mus musculus GN=Ing4|Isoform 3 of Inhibitor of growth protein 4 OS=Mus musculus GN=Ing4|Isoform 4 of Inhibitor of growth protein 4 OS=Mus musculus GN=Ing4|Isoform 5 of Inhibitor of growth protein 4 OS=Mus musculus GN=Ing4	7.33122	0.822922	1.76898		24.8852	9.08128	0.000179827	0.00318974	1.24271	0.0128085	0.210613	0.641541	0.000179827	0.00318974
Cyb5a	G5E850|P56395|Q544Z9	G5E850	Cytochrome b-5, isoform CRA_a OS=Mus musculus GN=Cyb5a PE=1 SV=1|Cytochrome b5 OS=Mus musculus GN=Cyb5a PE=1 SV=2|Cytochrome b-5, isoform CRA_d OS=Mus musculus GN=Cyb5a PE=1 SV=1	7.94015	0.822877	1.76893		24.8036	8.32991	0.000279051	0.00400968	0.746935	0.0224239	0.295817	0.641541	0.000279051	0.00400968
Gsr	P47791|P47791-2	P47791	Glutathione reductase, mitochondrial OS=Mus musculus GN=Gsr PE=1 SV=3|Isoform Cytoplasmic of Glutathione reductase, mitochondrial OS=Mus musculus GN=Gsr	9.01106	0.820393	1.76589		27.2407	13.8396	2.00894e-05	0.00132818	3.66253	0.000148702	0.00922422	0.0653209	2.00894e-05	0.00132818
Phldb2	Q8K1N2|Q8K1N2-2	Q8K1N2	Pleckstrin homology-like domain family B member 2 OS=Mus musculus GN=Phldb2 PE=1 SV=2|Isoform 2 of Pleckstrin homology-like domain family B member 2 OS=Mus musculus GN=Phldb2	7.94764	0.818886	1.76404		28.0352	11.2099	6.06289e-05	0.00216404	2.45675	0.00212285	0.0680601	0.210038	6.06289e-05	0.00216404
Tgm2	P21981	P21981	Protein-glutamine gamma-glutamyltransferase 2 OS=Mus musculus GN=Tgm2 PE=1 SV=4	8.10393	0.818403	1.76345		27.1192	7.12276	0.000611221	0.0055738	-0.142345	0.0509089	0.436179	1	0.000611221	0.0055738
Aldh3a2	B1ATI0|B1AV77|P47740	B1ATI0	Aldehyde dehydrogenase OS=Mus musculus GN=Aldh3a2 PE=1 SV=1|Aldehyde dehydrogenase OS=Mus musculus GN=Aldh3a2 PE=1 SV=1|Fatty aldehyde dehydrogenase OS=Mus musculus GN=Aldh3a2 PE=1 SV=2	7.39938	0.817757	1.76266		25.5269	11.0161	6.63887e-05	0.00220534	2.35627	0.00253304	0.0764258	0.210038	6.63887e-05	0.00220534
Selenbp2|Selenbp1	A0A0R4J135|P17563|Q63836	P17563	Selenium-binding protein 2 OS=Mus musculus GN=Selenbp2 PE=1 SV=1|Selenium-binding protein 1 OS=Mus musculus GN=Selenbp1 PE=1 SV=2|Selenium-binding protein 2 OS=Mus musculus GN=Selenbp2 PE=1 SV=2	7.13935	0.806245	1.74865		23.5444	12.303	3.72917e-05	0.00164366	2.99145	0.000746058	0.0308527	0.172091	3.72917e-05	0.00164366
Akr1b10	D3Z494|G5E895	D3Z494	MCG142264, isoform CRA_a OS=Mus musculus GN=Akr1b10 PE=1 SV=1|MCG142264, isoform CRA_b OS=Mus musculus GN=Akr1b10 PE=1 SV=1	7.40001	0.805748	1.74805		24.8548	10.2002	9.8943e-05	0.00251197	1.91249	0.00517814	0.119582	0.361993	9.8943e-05	0.00251197
Fech	P22315|Q544X6	P22315	Ferrochelatase, mitochondrial OS=Mus musculus GN=Fech PE=1 SV=2|Ferrochelatase OS=Mus musculus GN=Fech PE=1 SV=1	7.0646	0.80559	1.74786		24.7283	10.5581	8.27675e-05	0.00225889	2.11142	0.00380578	0.097078	0.210038	8.27675e-05	0.00225889
Rgs10	Q32MD7|Q9CQE5	Q32MD7	Regulator of G-protein signalling 10 OS=Mus musculus GN=Rgs10 PE=1 SV=1|Regulator of G-protein signaling 10 OS=Mus musculus GN=Rgs10 PE=1 SV=1	6.3767	0.790697	1.72991		21.6656	10.1214	0.000102988	0.0025716	1.86776	0.00553471	0.124974	0.361993	0.000102988	0.0025716
Crybg3	Q80W49-2	Q80W49	Isoform 2 of Beta/gamma crystallin domain-containing protein 3 OS=Mus musculus GN=Crybg3	6.49861	0.789711	1.72873		24.0456	8.10409	0.000320626	0.00423955	0.589786	0.0263363	0.32156	0.641541	0.000320626	0.00423955
Cryl1	A7VMV2|Q99KP3	A7VMV2	Crystallin, lamda 1, isoform CRA_a OS=Mus musculus GN=Cryl1 PE=1 SV=1|Lambda-crystallin homolog OS=Mus musculus GN=Cryl1 PE=1 SV=3	7.07551	0.788098	1.7268		24.4448	14.7347	1.443e-05	0.00110884	4.01634	5.37758e-05	0.00387321	0.0136427	1.443e-05	0.00110884
Tes	Q3ULB1|Q921W7	Q3ULB1	Testin OS=Mus musculus GN=Tes PE=1 SV=1|Putative uncharacterized protein Tes OS=Mus musculus GN=Tes PE=1 SV=2	7.08894	0.785233	1.72337		25.3124	13.1298	2.65064e-05	0.0015119	3.36327	0.000319827	0.017066	0.0653209	2.65064e-05	0.0015119
Dcxr	A2AC16|Q91X52	A2AC16	Dicarbonyl L-xylulose reductase, isoform CRA_a OS=Mus musculus GN=Dcxr PE=1 SV=1|L-xylulose reductase OS=Mus musculus GN=Dcxr PE=1 SV=2	7.04798	0.783899	1.72178		23.5827	8.11588	0.000318283	0.0042292	0.598088	0.0261183	0.320227	0.641541	0.000318283	0.0042292
Igkc|P01837	A0A075B5P2|P01837	P01837	Protein Igkc (Fragment) OS=Mus musculus GN=Igkc PE=1 SV=1|Ig kappa chain C region OS=Mus musculus PE=1 SV=1	7.29756	0.781001	1.71832		23.4589	4.57022	0.00496106	0.0188897	-2.52337	0.210339	0.761696	1	0.00496106	0.0188897
Cpt1a	P97742|Q7TQD5	P97742	Carnitine O-palmitoyltransferase 1, liver isoform OS=Mus musculus GN=Cpt1a PE=1 SV=4|Carnitine O-palmitoyltransferase 1, liver isoform OS=Mus musculus GN=Cpt1a PE=1 SV=1	7.65426	0.780803	1.71809		25.5795	12.4097	3.5642e-05	0.00160748	3.04092	0.000670635	0.0283786	0.137239	3.5642e-05	0.00160748
Dopey2	Q3UHQ6|Q3UHQ6-2	Q3UHQ6	Protein dopey-2 OS=Mus musculus GN=Dopey2 PE=1 SV=3|Isoform 2 of Protein dopey-2 OS=Mus musculus GN=Dopey2	6.21213	0.779437	1.71646		22.0009	13.2475	2.52904e-05	0.00150241	3.41414	0.000282364	0.0155426	0.0653209	2.52904e-05	0.00150241
Itgb5	O70309|Q6PE70	O70309	Integrin beta-5 OS=Mus musculus GN=Itgb5 PE=1 SV=2|Integrin beta OS=Mus musculus GN=Itgb5 PE=1 SV=1	7.37302	0.775459	1.71173		25.6776	9.89184	0.000115935	0.00261341	1.73539	0.00670376	0.141083	0.361993	0.000115935	0.00261341
Arhgef5	E9Q7D5	E9Q7D5	Rho guanine nucleotide exchange factor 5 OS=Mus musculus GN=Arhgef5 PE=1 SV=1	7.39966	0.768564	1.70357		25.9472	9.99834	0.000109705	0.00261104	1.79716	0.00613637	0.133548	0.361993	0.000109705	0.00261104
Mib1	Q80SY4	Q80SY4	E3 ubiquitin-protein ligase MIB1 OS=Mus musculus GN=Mib1 PE=1 SV=1	6.75245	0.767048	1.70178		24.9967	12.8028	3.02621e-05	0.00155975	3.21935	0.000449681	0.0217419	0.0669704	3.02621e-05	0.00155975
Rnf181	Q9CY62	Q9CY62	E3 ubiquitin-protein ligase RNF181 OS=Mus musculus GN=Rnf181 PE=1 SV=1	6.64634	0.766604	1.70126		22.8717	4.40773	0.00581892	0.0211131	-2.70378	0.22701	0.775263	1	0.00581892	0.0211131
Nde1	Q9CZA6|Q9CZA6-2|Q9CZA6-3	Q9CZA6	Nuclear distribution protein nudE homolog 1 OS=Mus musculus GN=Nde1 PE=1 SV=1|Isoform 2 of Nuclear distribution protein nudE homolog 1 OS=Mus musculus GN=Nde1|Isoform 3 of Nuclear distribution protein nudE homolog 1 OS=Mus musculus GN=Nde1	6.08257	0.762188	1.69606		22.0778	7.69167	0.000416889	0.00468555	0.292228	0.0350156	0.366922	0.641541	0.000416889	0.00468555
Zbtb20	Q8K0L9|Q8K0L9-2	Q8K0L9	Zinc finger and BTB domain-containing protein 20 OS=Mus musculus GN=Zbtb20 PE=1 SV=1|Isoform 2 of Zinc finger and BTB domain-containing protein 20 OS=Mus musculus GN=Zbtb20	7.10648	0.759945	1.69343		23.732	10.3229	9.30115e-05	0.00241581	1.98145	0.00466416	0.111364	0.361993	9.30115e-05	0.00241581
Cmbl	E0CXH4|Q8R1G2	E0CXH4	Carboxymethylenebutenolidase homolog (Fragment) OS=Mus musculus GN=Cmbl PE=1 SV=1|Carboxymethylenebutenolidase homolog OS=Mus musculus GN=Cmbl PE=1 SV=1	6.74959	0.757011	1.68999		23.6703	9.47083	0.00014501	0.0028311	1.4846	0.00943658	0.172127	0.427881	0.00014501	0.0028311
Pja1	O55176	O55176	E3 ubiquitin-protein ligase Praja-1 OS=Mus musculus GN=Pja1 PE=1 SV=3	7.24966	0.755763	1.68852		24.9032	7.42741	0.000496444	0.00507858	0.0939877	0.0417758	0.396551	0.747374	0.000496444	0.00507858
Map7d1	A2AJI0-2|A2AJI1|A8Y5P4	A2AJI0	Isoform 2 of MAP7 domain-containing protein 1 OS=Mus musculus GN=Map7d1|MAP7 domain-containing protein 1 OS=Mus musculus GN=Map7d1 PE=1 SV=1|MAP7 domain-containing protein 1 OS=Mus musculus GN=Map7d1 PE=1 SV=1	7.2392	0.753099	1.68541		25.6907	7.64993	0.000428403	0.00472772	0.261319	0.0360169	0.371341	0.641541	0.000428403	0.00472772
Gramd1a	F8WJ74|Q8VEF1|Q8VEF1-3	F8WJ74	GRAM domain-containing protein 1A OS=Mus musculus GN=Gramd1a PE=1 SV=1|GRAM domain-containing protein 1A OS=Mus musculus GN=Gramd1a PE=1 SV=2|Isoform 3 of GRAM domain-containing protein 1A OS=Mus musculus GN=Gramd1a	6.32301	0.748318	1.67983		23.2642	8.41128	0.000265643	0.0039326	0.802602	0.0211434	0.286468	0.641541	0.000265643	0.0039326
Acap2	Q6ZQK5	Q6ZQK5	Arf-GAP with coiled-coil, ANK repeat and PH domain-containing protein 2 OS=Mus musculus GN=Acap2 PE=1 SV=2	7.25079	0.747376	1.67874		26.3213	12.6394	3.23734e-05	0.00159347	3.1459	0.000531673	0.0244131	0.0749748	3.23734e-05	0.00159347
Cblb	B9EKI5|Q3TTA7|Q3TTA7-2	B9EKI5	Casitas B-lineage lymphoma b OS=Mus musculus GN=Cblb PE=1 SV=1|E3 ubiquitin-protein ligase CBL-B OS=Mus musculus GN=Cblb PE=1 SV=3|Isoform 2 of E3 ubiquitin-protein ligase CBL-B OS=Mus musculus GN=Cblb	5.86734	0.747096	1.67841		19.7218	5.01127	0.00327657	0.0144308	-2.05298	0.169591	0.720445	1	0.00327657	0.0144308
Ankrd13a	Q80UP5	Q80UP5	Ankyrin repeat domain-containing protein 13A OS=Mus musculus GN=Ankrd13a PE=1 SV=2	6.85109	0.743399	1.67412		22.8417	9.87039	0.00011724	0.00261341	1.72286	0.00682359	0.142612	0.361993	0.00011724	0.00261341
Blvrb	Q3U6G1|Q923D2	Q3U6G1	Biliverdin reductase B (Flavin reductase (NADPH)) OS=Mus musculus GN=Blvrb PE=1 SV=1|Flavin reductase (NADPH) OS=Mus musculus GN=Blvrb PE=1 SV=3	8.47149	0.742646	1.67324		26.7798	13.0326	2.75626e-05	0.00152723	3.32088	0.000354214	0.0183938	0.0669704	2.75626e-05	0.00152723
Bgn	P28653|Q3TNY9	P28653	Biglycan OS=Mus musculus GN=Bgn PE=1 SV=1|Biglycan OS=Mus musculus GN=Bgn PE=1 SV=1	7.67348	0.736928	1.66662		25.7397	11.072	6.46646e-05	0.00220377	2.38542	0.00240792	0.0739805	0.210038	6.46646e-05	0.00220377
Atp2b4	Q6Q477	Q6Q477	Plasma membrane calcium-transporting ATPase 4 OS=Mus musculus GN=Atp2b4 PE=1 SV=1	6.75686	0.736174	1.66575		23.6491	8.27504	0.000288541	0.00406472	0.709111	0.0233249	0.302106	0.641541	0.000288541	0.00406472
Cyp1a1	P00184|Q05A20	P00184	Cytochrome P450 1A1 OS=Mus musculus GN=Cyp1a1 PE=1 SV=2|Cytochrome P450 OS=Mus musculus GN=Cyp1a1 PE=1 SV=1	6.29917	0.735453	1.66492		22.3955	3.25055	0.0202974	0.0510329	-4.10259	0.372966	0.850021	1	0.0202974	0.0510329
Gstt1	Q64471	Q64471	Glutathione S-transferase theta-1 OS=Mus musculus GN=Gstt1 PE=1 SV=4	7.27624	0.735399	1.66486		25.5195	10.5322	8.38289e-05	0.00225889	2.09724	0.00389278	0.0982591	0.210038	8.38289e-05	0.00225889
Ptgr1	Q91YR9	Q91YR9	Prostaglandin reductase 1 OS=Mus musculus GN=Ptgr1 PE=1 SV=2	8.70392	0.734631	1.66397		27.1645	11.5073	5.28961e-05	0.00200095	2.60745	0.00161061	0.0560173	0.210038	5.28961e-05	0.00200095
Amotl2	B8JK87|Q3TP05|Q8K371	B8JK87	Angiomotin-like protein 2 OS=Mus musculus GN=Amotl2 PE=1 SV=1|Angiomotin-like protein 2 OS=Mus musculus GN=Amotl2 PE=1 SV=1|Angiomotin-like protein 2 OS=Mus musculus GN=Amotl2 PE=1 SV=1	6.26334	0.733422	1.66258		22.7915	6.63647	0.00086552	0.00663451	-0.538083	0.0689172	0.511544	1	0.00086552	0.00663451
Arpin	Q9D0A3	Q9D0A3	Arpin OS=Mus musculus GN=Arpin PE=1 SV=1	7.007	0.731916	1.66084		25.1817	11.3063	5.79863e-05	0.00214882	2.50602	0.00194251	0.0640411	0.210038	5.79863e-05	0.00214882
D630045J12Rik|Kiaa1549	D3YTS3|Q68FD9	D3YTS3	Protein D630045J12Rik OS=Mus musculus GN=D630045J12Rik PE=1 SV=2|UPF0606 protein KIAA1549 OS=Mus musculus GN=Kiaa1549 PE=1 SV=3	6.68557	0.730257	1.65893		24.382	4.80763	0.00395557	0.0162755	-2.26672	0.187603	0.740315	1	0.00395557	0.0162755
Cgnl1	B2RSU6|Q6AW69-4|Q6AW69-5	B2RSU6	Cingulin-like 1 OS=Mus musculus GN=Cgnl1 PE=1 SV=1|Isoform 4 of Cingulin-like protein 1 OS=Mus musculus GN=Cgnl1|Isoform 5 of Cingulin-like protein 1 OS=Mus musculus GN=Cgnl1	7.49506	0.72836	1.65676		27.1854	7.65137	0.000427999	0.00472772	0.262388	0.0359819	0.37119	0.641541	0.000427999	0.00472772
C330027C09Rik|Kiaa1524	D3Z7B5|Q8BWY9	D3Z7B5	Protein C330027C09Rik OS=Mus musculus GN=C330027C09Rik PE=1 SV=1|Protein CIP2A OS=Mus musculus GN=Kiaa1524 PE=1 SV=3	8.07526	0.727687	1.65598		27.9224	12.498	3.43411e-05	0.00160179	3.08154	0.000613624	0.0268295	0.0749748	3.43411e-05	0.00160179
Maged1	Q9QYH6	Q9QYH6	Melanoma-associated antigen D1 OS=Mus musculus GN=Maged1 PE=1 SV=1	6.96354	0.723242	1.65089		23.3688	5.60842	0.00194284	0.0104179	-1.45869	0.124247	0.653747	1	0.00194284	0.0104179
Deptor	B2ZRS5|Q570Y9|Q570Y9-3	B2ZRS5	DEP domain-containing mTOR-interacting protein OS=Mus musculus GN=Deptor PE=1 SV=1|DEP domain-containing mTOR-interacting protein OS=Mus musculus GN=Deptor PE=1 SV=2|Isoform 3 of DEP domain-containing mTOR-interacting protein OS=Mus musculus GN=Deptor	6.30555	0.721248	1.64861		21.9371	9.93894	0.00011313	0.00261341	1.76279	0.00644728	0.137739	0.361993	0.00011313	0.00261341
Trim44	Q4KMS1|Q9QXA7	Q4KMS1	Tripartite motif-containing 44 OS=Mus musculus GN=Trim44 PE=1 SV=1|Tripartite motif-containing protein 44 OS=Mus musculus GN=Trim44 PE=1 SV=2	6.44344	0.718474	1.64544		21.8836	12.8123	3.01449e-05	0.00155975	3.22357	0.000445313	0.0215988	0.0669704	3.01449e-05	0.00155975
Prkar2b	P31324	P31324	cAMP-dependent protein kinase type II-beta regulatory subunit OS=Mus musculus GN=Prkar2b PE=1 SV=3	8.08979	0.717564	1.6444		26.4736	13.1951	2.58235e-05	0.00150241	3.39155	0.000298506	0.0162106	0.0653209	2.58235e-05	0.00150241
Cyp4f16	Q99N17	Q99N17	Cytochrome P450 CYP4F16 OS=Mus musculus GN=Cyp4f16 PE=1 SV=1	6.54118	0.715289	1.64181		23.0502	12.9675	2.82965e-05	0.00154077	3.29235	0.000379102	0.0193135	0.0669704	2.82965e-05	0.00154077
Gstm2	P15626	P15626	Glutathione S-transferase Mu 2 OS=Mus musculus GN=Gstm2 PE=1 SV=2	7.49069	0.712671	1.63884		24.5994	11.0656	6.48585e-05	0.00220377	2.38211	0.00242189	0.0742579	0.210038	6.48585e-05	0.00220377
Tpm2	A2AIM4|P58774|P58774-2	A2AIM4	Tropomyosin beta chain OS=Mus musculus GN=Tpm2 PE=1 SV=1|Tropomyosin beta chain OS=Mus musculus GN=Tpm2 PE=1 SV=1|Isoform 2 of Tropomyosin beta chain OS=Mus musculus GN=Tpm2	7.07837	0.711033	1.63698		25.5491	6.26498	0.00114521	0.00775075	-0.856881	0.0859532	0.566376	1	0.00114521	0.00775075
Ddah2	Q99LD8	Q99LD8	N(G),N(G)-dimethylarginine dimethylaminohydrolase 2 OS=Mus musculus GN=Ddah2 PE=1 SV=1	7.71465	0.708222	1.63379		26.277	6.74238	0.000800968	0.00634881	-0.44987	0.0646036	0.495387	1	0.000800968	0.00634881
2810474O19Rik|Kiaa1551	A0A087WP47|A0A087WP74|Q5DTW7|Q5DTW7-3	A0A087WP47	Protein 2810474O19Rik (Fragment) OS=Mus musculus GN=2810474O19Rik PE=1 SV=1|Protein 2810474O19Rik OS=Mus musculus GN=2810474O19Rik PE=1 SV=1|Uncharacterized protein KIAA1551 OS=Mus musculus GN=Kiaa1551 PE=1 SV=2|Isoform 2 of Uncharacterized protein KIAA1551 OS=Mus musculus GN=Kiaa1551	6.28473	0.707081	1.6325		22.7741	6.9303	0.000699748	0.00600621	-0.296161	0.0574991	0.466313	1	0.000699748	0.00600621
Exog	E9PZS5|Q8C163	E9PZS5	Nuclease EXOG, mitochondrial OS=Mus musculus GN=Exog PE=1 SV=1|Nuclease EXOG, mitochondrial OS=Mus musculus GN=Exog PE=1 SV=1	5.64395	0.703519	1.62847		19.3551	3.9715	0.00909874	0.0286608	-3.20763	0.276361	0.807677	1	0.00909874	0.0286608
Prkce	P16054	P16054	Protein kinase C epsilon type OS=Mus musculus GN=Prkce PE=1 SV=1	6.61378	0.702034	1.6268		23.8213	12.4214	3.54662e-05	0.00160748	3.04633	0.0006628	0.0281717	0.0749748	3.54662e-05	0.00160748
Tubgcp4	Q543T6|Q8BKL6|Q8BYN2|Q9D4F8	Q543T6	Gamma-tubulin complex component OS=Mus musculus GN=Tubgcp4 PE=1 SV=1|Gamma-tubulin complex component OS=Mus musculus GN=Tubgcp4 PE=1 SV=1|Gamma-tubulin complex component OS=Mus musculus GN=Tubgcp4 PE=1 SV=1|Gamma-tubulin complex component 4 OS=Mus musculus GN=Tubgcp4 PE=1 SV=2	6.6553	0.698952	1.62333		23.5973	5.66996	0.00184531	0.0101256	-1.40008	0.120171	0.646158	1	0.00184531	0.0101256
Nav3	E9QMF5|Q80TN7	E9QMF5	Neuron navigator 3 OS=Mus musculus GN=Nav3 PE=1 SV=1|Neuron navigator 3 OS=Mus musculus GN=Nav3 PE=1 SV=2	7.39318	0.698713	1.62306		25.7679	13.1053	2.67683e-05	0.00151202	3.3526	0.000328195	0.0173936	0.0669704	2.67683e-05	0.00151202
Hmgb3	O54879|Q544R9	O54879	High mobility group protein B3 OS=Mus musculus GN=Hmgb3 PE=1 SV=3|High mobility group box 3 OS=Mus musculus GN=Hmgb3 PE=1 SV=1	7.00463	0.698441	1.62275		23.4165	6.4317	0.00100835	0.00734243	-0.711964	0.0779278	0.542165	1	0.00100835	0.00734243
Arl6	D3Z067|O88848|O88848-2	D3Z067	ADP-ribosylation factor-like protein 6 (Fragment) OS=Mus musculus GN=Arl6 PE=1 SV=1|ADP-ribosylation factor-like protein 6 OS=Mus musculus GN=Arl6 PE=1 SV=1|Isoform 2 of ADP-ribosylation factor-like protein 6 OS=Mus musculus GN=Arl6	7.07254	0.698308	1.6226		23.7147	9.91559	0.00011451	0.00261341	1.74922	0.0065733	0.139395	0.361993	0.00011451	0.00261341
Csrp1	P97315|Q4FJX4	P97315	Cysteine and glycine-rich protein 1 OS=Mus musculus GN=Csrp1 PE=1 SV=3|Csrp1 protein OS=Mus musculus GN=Csrp1 PE=1 SV=1	7.16376	0.6964	1.62046		25.4785	10.0575	0.000106412	0.0025904	1.83122	0.00584003	0.129404	0.361993	0.000106412	0.0025904
Serpinh1	P19324	P19324	Serpin H1 OS=Mus musculus GN=Serpinh1 PE=1 SV=3	8.88196	0.695377	1.61931		27.3087	11.1749	6.16256e-05	0.00218326	2.43871	0.00219219	0.0695472	0.210038	6.16256e-05	0.00218326
Dnm1	A0A0J9YUE9|A0A0J9YUN4|P39053|P39053-3|P39053-4|P39053-5|P39053-6	P39053	Dynamin-1 OS=Mus musculus GN=Dnm1 PE=1 SV=1|Dynamin-1 OS=Mus musculus GN=Dnm1 PE=1 SV=1|Dynamin-1 OS=Mus musculus GN=Dnm1 PE=1 SV=2|Isoform 3 of Dynamin-1 OS=Mus musculus GN=Dnm1|Isoform 4 of Dynamin-1 OS=Mus musculus GN=Dnm1|Isoform 5 of Dynamin-1 OS=Mus musculus GN=Dnm1|Isoform 6 of Dynamin-1 OS=Mus musculus GN=Dnm1	6.65032	0.694583	1.61842		24.8134	10.0664	0.00010593	0.00258951	1.83629	0.00579691	0.128788	0.361993	0.00010593	0.00258951
Bcl2l11	O54918|O54918-2	O54918	Bcl-2-like protein 11 OS=Mus musculus GN=Bcl2l11 PE=1 SV=1|Isoform BimL of Bcl-2-like protein 11 OS=Mus musculus GN=Bcl2l11	6.76525	0.693013	1.61666		23.972	6.31692	0.00110038	0.00764949	-0.811407	0.0833844	0.55891	1	0.00110038	0.00764949
Smarcd3	A0A0G2JG60|Q6P9Z1	Q6P9Z1	SWI/SNF related, matrix associated, actin dependent regulator of chromatin, subfamily d, member 3, isoform CRA_a OS=Mus musculus GN=Smarcd3 PE=1 SV=1|SWI/SNF-related matrix-associated actin-dependent regulator of chromatin subfamily D member 3 OS=Mus musculus GN=Smarcd3 PE=1 SV=2	6.70524	0.691882	1.61539		23.219	3.31637	0.0188003	0.0483128	-4.0178	0.363366	0.846666	1	0.0188003	0.0483128
Stk10	O55098	O55098	Serine/threonine-protein kinase 10 OS=Mus musculus GN=Stk10 PE=1 SV=2	7.32611	0.691733	1.61522		26.8415	11.0124	6.65056e-05	0.00220534	2.35433	0.00254158	0.0765897	0.210038	6.65056e-05	0.00220534
Pgrmc1	O55022|Q3TXU8	O55022	Membrane-associated progesterone receptor component 1 OS=Mus musculus GN=Pgrmc1 PE=1 SV=4|Membrane-associated progesterone receptor component 1 OS=Mus musculus GN=Pgrmc1 PE=1 SV=1	7.91456	0.687483	1.61047		25.8842	6.27801	0.00113377	0.00772397	-0.845444	0.0853028	0.56451	1	0.00113377	0.00772397
Rnf14	Q9JI90	Q9JI90	E3 ubiquitin-protein ligase RNF14 OS=Mus musculus GN=Rnf14 PE=1 SV=2	6.62886	0.685237	1.60797		22.3469	7.18975	0.000583526	0.00546969	-0.0896356	0.0487686	0.426645	0.811024	0.000583526	0.00546969
Coasy	Q9DBL7	Q9DBL7	Bifunctional coenzyme A synthase OS=Mus musculus GN=Coasy PE=1 SV=2	7.14948	0.684696	1.60736		24.2667	7.16554	0.000593362	0.00549174	-0.108635	0.0495332	0.429789	0.811024	0.000593362	0.00549174
Rcn3	Q8BH97	Q8BH97	Reticulocalbin-3 OS=Mus musculus GN=Rcn3 PE=1 SV=1	7.03745	0.683891	1.60647		24.1113	12.4435	3.51363e-05	0.00160748	3.05654	0.00064821	0.0277813	0.0749748	3.51363e-05	0.00160748
Dpysl5	Q9EQF6	Q9EQF6	Dihydropyrimidinase-related protein 5 OS=Mus musculus GN=Dpysl5 PE=1 SV=1	7.62872	0.683742	1.6063		25.4421	10.7891	7.39769e-05	0.00224166	2.23622	0.00310511	0.086572	0.210038	7.39769e-05	0.00224166
Heca	Q3V1N5	Q3V1N5	Protein Heca OS=Mus musculus GN=Heca PE=1 SV=1	6.64982	0.681787	1.60413		22.0117	6.11583	0.00128627	0.00827824	-0.989152	0.0936868	0.587402	1	0.00128627	0.00827824
Pqbp1	A2AER7|Q91VJ5	A2AER7	Polyglutamine-binding protein 1 OS=Mus musculus GN=Pqbp1 PE=1 SV=1|Polyglutamine-binding protein 1 OS=Mus musculus GN=Pqbp1 PE=1 SV=1	7.11363	0.679963	1.6021		23.957	5.49472	0.00213918	0.0109899	-1.56825	0.132061	0.667421	1	0.00213918	0.0109899
Mrs2	Q5NCE8	Q5NCE8	Magnesium transporter MRS2 homolog, mitochondrial OS=Mus musculus GN=Mrs2 PE=2 SV=2	6.87007	0.679646	1.60175		24.9293	12.5204	3.40205e-05	0.00160179	3.09177	0.000599918	0.0264415	0.0749748	3.40205e-05	0.00160179
Gm10269|Rpl35	G3UWD7|Q6ZWV7	Q6ZWV7	MCG123152 OS=Mus musculus GN=Gm10269 PE=3 SV=1|60S ribosomal protein L35 OS=Mus musculus GN=Rpl35 PE=1 SV=1	6.918	0.679391	1.60146		25.0425	3.89674	0.00985122	0.0303435	-3.29686	0.285502	0.812681	1	0.00985122	0.0303435
Pdia5	Q921X9	Q921X9	Protein disulfide-isomerase A5 OS=Mus musculus GN=Pdia5 PE=1 SV=1	7.79268	0.678477	1.60045		25.8	8.5563	0.000243577	0.00379917	0.900586	0.0190189	0.269788	0.641541	0.000243577	0.00379917
Zc2hc1a	Q8BJH1	Q8BJH1	Zinc finger C2HC domain-containing protein 1A OS=Mus musculus GN=Zc2hc1a PE=1 SV=1	7.07685	0.678295	1.60025		24.4839	7.69758	0.00041529	0.00468555	0.296587	0.0348759	0.366294	0.641541	0.00041529	0.00468555
Wdr53	Q9DB94	Q9DB94	WD repeat-containing protein 53 OS=Mus musculus GN=Wdr53 PE=1 SV=1	7.16315	0.676913	1.59871		24.5171	5.15247	0.00288442	0.0133824	-1.90817	0.157886	0.705816	1	0.00288442	0.0133824
Acox1	A2A848|Q9R0H0|Q9R0H0-2	A2A848	Peroxisomal acyl-coenzyme A oxidase 1 (Fragment) OS=Mus musculus GN=Acox1 PE=1 SV=1|Peroxisomal acyl-coenzyme A oxidase 1 OS=Mus musculus GN=Acox1 PE=1 SV=5|Isoform 2 of Peroxisomal acyl-coenzyme A oxidase 1 OS=Mus musculus GN=Acox1	7.28274	0.675326	1.59696		24.3508	3.81064	0.0108067	0.0324423	-3.40067	0.296281	0.818257	1	0.0108067	0.0324423
Fat1	F2Z4A3	F2Z4A3	Protein Fat1 OS=Mus musculus GN=Fat1 PE=1 SV=1	6.31726	0.670874	1.59204		23.1732	3.2955	0.0192613	0.0490425	-4.04463	0.366394	0.84774	1	0.0192613	0.0490425
Fam120b	Q6RI63	Q6RI63	Constitutive coactivator of peroxisome proliferator-activated receptor gamma OS=Mus musculus GN=Fam120b PE=1 SV=1	6.57206	0.670272	1.59137		23.3624	6.25829	0.00115114	0.00775529	-0.862759	0.0862886	0.567332	1	0.00115114	0.00775529
Cbr1	B2RXY7|P48758	B2RXY7	Carbonyl reductase 1 OS=Mus musculus GN=Cbr1 PE=1 SV=1|Carbonyl reductase [NADPH] 1 OS=Mus musculus GN=Cbr1 PE=1 SV=3	8.11744	0.666277	1.58697		26.6415	11.3072	5.79624e-05	0.00214882	2.50647	0.0019409	0.0640043	0.210038	5.79624e-05	0.00214882
Cald1	E9QA15|F6T2Z7|Q8VCQ8	E9QA15	Protein Cald1 OS=Mus musculus GN=Cald1 PE=1 SV=1|Protein Cald1 (Fragment) OS=Mus musculus GN=Cald1 PE=1 SV=7|Caldesmon 1 OS=Mus musculus GN=Cald1 PE=1 SV=1	8.46219	0.665841	1.58649		28.7233	8.88522	0.000201029	0.00338031	1.11718	0.0148789	0.232329	0.641541	0.000201029	0.00338031
Unc13b	A0A140LJ69|E9Q263|Q9Z1N9|Q9Z1N9-2|Q9Z1N9-3	Q9Z1N9	Protein unc-13 homolog B OS=Mus musculus GN=Unc13b PE=1 SV=1|Protein unc-13 homolog B OS=Mus musculus GN=Unc13b PE=1 SV=1|Protein unc-13 homolog B OS=Mus musculus GN=Unc13b PE=1 SV=2|Isoform 2 of Protein unc-13 homolog B OS=Mus musculus GN=Unc13b|Isoform 3 of Protein unc-13 homolog B OS=Mus musculus GN=Unc13b	6.21957	0.664782	1.58533		23.0319	12.112	4.04757e-05	0.00172108	2.90173	0.000901079	0.0359252	0.172091	4.04757e-05	0.00172108
Ube3d	Q8BX13	Q8BX13	E3 ubiquitin-protein ligase E3D OS=Mus musculus GN=Ube3d PE=2 SV=1	6.52652	0.663082	1.58346		23.7837	1.52108	0.184448	0.266151	-6.41739	0.676746	0.911378	1	0.184448	0.266151
Afap1	Q80YS6	Q80YS6	Actin filament-associated protein 1 OS=Mus musculus GN=Afap1 PE=1 SV=1	6.10726	0.661244	1.58145		21.7893	8.0607	0.000329424	0.00426978	0.559132	0.0271521	0.326452	0.641541	0.000329424	0.00426978
Gmip	Q6PGG2|Q6PGG2-2	Q6PGG2	GEM-interacting protein OS=Mus musculus GN=Gmip PE=1 SV=1|Isoform 2 of GEM-interacting protein OS=Mus musculus GN=Gmip	6.03515	0.659076	1.57907		21.1276	8.06422	0.000328701	0.00426978	0.561623	0.0270852	0.326056	0.641541	0.000328701	0.00426978
Col18a1	E9QPX1|P39061|P39061-1|P39061-2	E9QPX1	Collagen alpha-1(XVIII) chain OS=Mus musculus GN=Col18a1 PE=1 SV=1|Collagen alpha-1(XVIII) chain OS=Mus musculus GN=Col18a1 PE=1 SV=4|Isoform 2 of Collagen alpha-1(XVIII) chain OS=Mus musculus GN=Col18a1|Isoform 3 of Collagen alpha-1(XVIII) chain OS=Mus musculus GN=Col18a1	6.33635	0.658035	1.57793		25.1398	6.35826	0.00106615	0.00759971	-0.775426	0.0813846	0.552917	1	0.00106615	0.00759971
Hspa4l	P48722|P48722-2	P48722	Heat shock 70 kDa protein 4L OS=Mus musculus GN=Hspa4l PE=1 SV=2|Isoform 2 of Heat shock 70 kDa protein 4L OS=Mus musculus GN=Hspa4l	7.424	0.657903	1.57779		26.455	11.8214	4.59561e-05	0.00183782	2.76233	0.00119493	0.0446807	0.176889	4.59561e-05	0.00183782
Hmgb2	P30681	P30681	High mobility group protein B2 OS=Mus musculus GN=Hmgb2 PE=1 SV=3	8.39759	0.657297	1.57713		26.7278	4.49893	0.00531825	0.019708	-2.60204	0.217541	0.767753	1	0.00531825	0.019708
Enkd1	Q7TSV9	Q7TSV9	Enkurin domain-containing protein 1 OS=Mus musculus GN=Enkd1 PE=1 SV=1	5.73284	0.657156	1.57697		20.0303	3.83918	0.0104787	0.0317527	-3.36613	0.292678	0.816431	1	0.0104787	0.0317527
Nceh1	Q8BLF1	Q8BLF1	Neutral cholesterol ester hydrolase 1 OS=Mus musculus GN=Nceh1 PE=1 SV=1	7.21443	0.65603	1.57574		24.8807	10.1798	9.99722e-05	0.00251792	1.90094	0.00526842	0.120971	0.361993	9.99722e-05	0.00251792
Prps2	Q9CS42	Q9CS42	Ribose-phosphate pyrophosphokinase 2 OS=Mus musculus GN=Prps2 PE=1 SV=4	7.36048	0.655851	1.57555		24.0496	5.22053	0.00271493	0.0128627	-1.83934	0.152467	0.698513	1	0.00271493	0.0128627
Hist1h1a	P43275	P43275	Histone H1.1 OS=Mus musculus GN=Hist1h1a PE=1 SV=2	6.92958	0.653296	1.57276		23.6288	6.76836	0.000786007	0.00630536	-0.428414	0.0635805	0.491397	1	0.000786007	0.00630536
Uprt	B1AVZ0	B1AVZ0	Uracil phosphoribosyltransferase homolog OS=Mus musculus GN=Uprt PE=1 SV=1	6.85185	0.647396	1.56634		23.7781	7.15055	0.00059955	0.00551055	-0.120428	0.0500117	0.431811	1	0.00059955	0.00551055
Maged2	Q9ER67	Q9ER67	Maged2 protein OS=Mus musculus GN=Maged2 PE=1 SV=1	7.24061	0.646136	1.56497		25.4567	11.0617	6.498e-05	0.00220377	2.38004	0.00243066	0.0744316	0.210038	6.498e-05	0.00220377
Dhx32	D3Z4E3|Q8BZS9|Q8BZS9-2	D3Z4E3	DEAH (Asp-Glu-Ala-His) box polypeptide 32, isoform CRA_b OS=Mus musculus GN=Dhx32 PE=1 SV=1|Putative pre-mRNA-splicing factor ATP-dependent RNA helicase DHX32 OS=Mus musculus GN=Dhx32 PE=1 SV=2|Isoform 2 of Putative pre-mRNA-splicing factor ATP-dependent RNA helicase DHX32 OS=Mus musculus GN=Dhx32	6.26193	0.645386	1.56416		22.8106	8.69509	0.000224448	0.00361295	0.992915	0.0171629	0.253879	0.641541	0.000224448	0.00361295
Numbl	O08919	O08919	Numb-like protein OS=Mus musculus GN=Numbl PE=1 SV=3	6.87093	0.642608	1.56115		23.7801	8.48688	0.000253861	0.0038664	0.85387	0.0200115	0.277772	0.641541	0.000253861	0.0038664
Sync	Q9EPM5|Q9EPM5-2|Q9EPM5-3	Q9EPM5	Syncoilin OS=Mus musculus GN=Sync PE=1 SV=1|Isoform 2 of Syncoilin OS=Mus musculus GN=Sync|Isoform 3 of Syncoilin OS=Mus musculus GN=Sync	6.34645	0.642337	1.56086		23.0954	4.90784	0.00360303	0.0152899	-2.16081	0.17857	0.730716	1	0.00360303	0.0152899
Fmn1	E9Q7P6|Q05860-2|Q05860-5	E9Q7P6	Formin-1 OS=Mus musculus GN=Fmn1 PE=1 SV=1|Isoform 2 of Formin-1 OS=Mus musculus GN=Fmn1|Isoform 5 of Formin-1 OS=Mus musculus GN=Fmn1	5.97704	0.640569	1.55894		21.5808	9.73235	0.000126061	0.00268653	1.64164	0.00764184	0.152508	0.361993	0.000126061	0.00268653
Chmp1b1	Q99LU0	Q99LU0	Charged multivesicular body protein 1b-1 OS=Mus musculus GN=Chmp1b1 PE=1 SV=1	7.55398	0.640242	1.55859		24.132	2.67529	0.040786	0.0839083	-4.86574	0.4634	0.87565	1	0.040786	0.0839083
Cdca2	Q14B71	Q14B71	Cell division cycle-associated protein 2 OS=Mus musculus GN=Cdca2 PE=1 SV=2	6.29633	0.639736	1.55804		22.7292	4.68565	0.0044395	0.0174757	-2.39756	0.199047	0.751536	1	0.0044395	0.0174757
Lpp	Q8BFW7|Q8BFW7-4	Q8BFW7	Lipoma-preferred partner homolog OS=Mus musculus GN=Lpp PE=1 SV=1|Isoform 4 of Lipoma-preferred partner homolog OS=Mus musculus GN=Lpp	8.01338	0.639655	1.55796		25.2759	7.1103	0.000616538	0.00560472	-0.152193	0.0513154	0.438136	1	0.000616538	0.00560472
Mlf2	Q3UNV7|Q99KX1	Q3UNV7	Myeloid leukemia factor 2 OS=Mus musculus GN=Mlf2 PE=1 SV=1|Myeloid leukemia factor 2 OS=Mus musculus GN=Mlf2 PE=1 SV=1	6.53725	0.637695	1.55584		22.9409	8.21127	0.000300048	0.0041465	0.664868	0.0244113	0.309391	0.641541	0.000300048	0.0041465
Slc30a3	P97441|Q3TMQ7	P97441	Zinc transporter 3 OS=Mus musculus GN=Slc30a3 PE=1 SV=1|Zinc transporter 3 OS=Mus musculus GN=Slc30a3 PE=1 SV=1	7.40445	0.636064	1.55408		24.5404	10.4715	8.63762e-05	0.00229469	2.06392	0.00410351	0.10174	0.361993	8.63762e-05	0.00229469
Sptbn1	Q62261|Q62261-2	Q62261	Spectrin beta chain, non-erythrocytic 1 OS=Mus musculus GN=Sptbn1 PE=1 SV=2|Isoform 2 of Spectrin beta chain, non-erythrocytic 1 OS=Mus musculus GN=Sptbn1	8.56992	0.635175	1.55313		29.4324	11.9617	4.32084e-05	0.00178559	2.83006	0.00104352	0.0403093	0.176889	4.32084e-05	0.00178559
Tpm4	Q6IRU2	Q6IRU2	Tropomyosin alpha-4 chain OS=Mus musculus GN=Tpm4 PE=1 SV=3	8.24915	0.635002	1.55294		26.7067	5.19332	0.00278126	0.013039	-1.86677	0.154616	0.701452	1	0.00278126	0.013039
Lztr1	E9PUQ1|Q9CQ33|Q9CQ33-2	Q9CQ33	Leucine-zipper-like transcriptional regulator 1 OS=Mus musculus GN=Lztr1 PE=1 SV=1|Leucine-zipper-like transcriptional regulator 1 OS=Mus musculus GN=Lztr1 PE=1 SV=2|Isoform 2 of Leucine-zipper-like transcriptional regulator 1 OS=Mus musculus GN=Lztr1	6.54441	0.634746	1.55266		23.3092	7.08843	0.000626006	0.00563793	-0.16952	0.0520357	0.44157	1	0.000626006	0.00563793
Heg1	E9Q440|E9Q7X6|E9Q7X6-2	E9Q440	Protein HEG homolog 1 OS=Mus musculus GN=Heg1 PE=1 SV=1|Protein HEG homolog 1 OS=Mus musculus GN=Heg1 PE=1 SV=1|Isoform 2 of Protein HEG homolog 1 OS=Mus musculus GN=Heg1	6.84982	0.630891	1.54852		24.3036	11.5684	5.14533e-05	0.0019957	2.63794	0.00152051	0.0536846	0.210038	5.14533e-05	0.0019957
Nqo1	Q542Y0|Q64669	Q542Y0	NAD(P)H dehydrogenase [quinone] 1 OS=Mus musculus GN=Nqo1 PE=1 SV=1|NAD(P)H dehydrogenase [quinone] 1 OS=Mus musculus GN=Nqo1 PE=1 SV=3	8.57599	0.630581	1.54819		27.3062	10.7581	7.50894e-05	0.00225889	2.21965	0.00319168	0.0879746	0.210038	7.50894e-05	0.00225889
Lcmt1	A0A0U1RNF2|A2RTH5	A2RTH5	Protein Lcmt1 OS=Mus musculus GN=Lcmt1 PE=1 SV=1|Leucine carboxyl methyltransferase 1 OS=Mus musculus GN=Lcmt1 PE=1 SV=1	6.66066	0.62853	1.54599		23.5965	3.33468	0.018406	0.0475304	-3.99432	0.360723	0.845716	1	0.018406	0.0475304
Trim47	Q8C0E3-2	Q8C0E3	Isoform 2 of Tripartite motif-containing protein 47 OS=Mus musculus GN=Trim47	7.40887	0.625823	1.54309		26.0073	11.263	5.9155e-05	0.00215317	2.48396	0.00202162	0.0658318	0.210038	5.9155e-05	0.00215317
Xxylt1	Q3U4G3	Q3U4G3	Xyloside xylosyltransferase 1 OS=Mus musculus GN=Xxylt1 PE=1 SV=2	6.8438	0.623024	1.5401		24.3942	9.40379	0.000150395	0.00287652	1.44367	0.00995339	0.17764	0.427881	0.000150395	0.00287652
Mef2a	Q60929|Q60929-2	Q60929	Myocyte-specific enhancer factor 2A OS=Mus musculus GN=Mef2a PE=1 SV=2|Isoform 2 of Myocyte-specific enhancer factor 2A OS=Mus musculus GN=Mef2a	6.17818	0.619905	1.53677		22.1115	9.40457	0.000150331	0.00287652	1.44414	0.00994723	0.177576	0.427881	0.000150331	0.00287652
Poglut1	Q8BYB9	Q8BYB9	Protein O-glucosyltransferase 1 OS=Mus musculus GN=Poglut1 PE=1 SV=2	7.33197	0.619664	1.53652		25.6778	8.01904	0.00033814	0.00433326	0.529556	0.0279559	0.331128	0.641541	0.00033814	0.00433326
Uhrf2	Q7TMI3	Q7TMI3	E3 ubiquitin-protein ligase UHRF2 OS=Mus musculus GN=Uhrf2 PE=1 SV=1	7.39248	0.618621	1.53541		25.8727	9.8414	0.00011903	0.00263315	1.7059	0.00698861	0.144682	0.361993	0.00011903	0.00263315
Mmrn2	A6H6E2	A6H6E2	Multimerin-2 OS=Mus musculus GN=Mmrn2 PE=1 SV=1	6.66131	0.617313	1.53402		23.7472	11.2341	5.99542e-05	0.00215317	2.46912	0.00207631	0.0670443	0.210038	5.99542e-05	0.00215317
Gopc	K3W4Q9|Q8BH60|Q8BH60-2	K3W4Q9	Golgi-associated PDZ and coiled-coil motif-containing protein OS=Mus musculus GN=Gopc PE=1 SV=1|Golgi-associated PDZ and coiled-coil motif-containing protein OS=Mus musculus GN=Gopc PE=1 SV=1|Isoform 2 of Golgi-associated PDZ and coiled-coil motif-containing protein OS=Mus musculus GN=Gopc	6.95752	0.61601	1.53263		24.6489	6.79897	0.000768792	0.00623258	-0.403215	0.062392	0.486682	1	0.000768792	0.00623258
Elmod2	Q8BGF6	Q8BGF6	ELMO domain-containing protein 2 OS=Mus musculus GN=Elmod2 PE=1 SV=1	6.92441	0.614135	1.53064		23.0494	7.68257	0.000419368	0.00468555	0.285502	0.0352318	0.367889	0.641541	0.000419368	0.00468555
Pnpo	Q91XF0	Q91XF0	Pyridoxine-5'-phosphate oxidase OS=Mus musculus GN=Pnpo PE=1 SV=1	6.92318	0.612209	1.5286		23.2219	9.95583	0.000112143	0.00261341	1.77258	0.00635747	0.136544	0.361993	0.000112143	0.00261341
Pon3	Q62087	Q62087	Serum paraoxonase/lactonase 3 OS=Mus musculus GN=Pon3 PE=1 SV=2	7.57225	0.611335	1.52767		25.9999	5.27741	0.00258205	0.0124978	-1.78228	0.148047	0.692282	1	0.00258205	0.0124978
Cdadc1	G3UW39|Q8BMD5|Q8BMD5-2|Q8BMD5-3|Q8BMD5-4	G3UW39	Cytidine and dCMP deaminase domain-containing protein 1 OS=Mus musculus GN=Cdadc1 PE=1 SV=1|Cytidine and dCMP deaminase domain-containing protein 1 OS=Mus musculus GN=Cdadc1 PE=2 SV=1|Isoform 2 of Cytidine and dCMP deaminase domain-containing protein 1 OS=Mus musculus GN=Cdadc1|Isoform 3 of Cytidine and dCMP deaminase domain-containing protein 1 OS=Mus musculus GN=Cdadc1|Isoform 4 of Cytidine and…	6.27514	0.611082	1.5274		22.1397	5.86006	0.00157807	0.00929272	-1.22196	0.108239	0.6219	1	0.00157807	0.00929272
Tor1b	Q9ER41	Q9ER41	Torsin-1B OS=Mus musculus GN=Tor1b PE=1 SV=2	7.30124	0.609682	1.52592		24.4524	10.7017	7.71653e-05	0.00225889	2.18935	0.00335493	0.0905348	0.210038	7.71653e-05	0.00225889
Ptpn13	G5E8B1|Q64512	G5E8B1	Protein tyrosine phosphatase, non-receptor type 13 OS=Mus musculus GN=Ptpn13 PE=1 SV=1|Tyrosine-protein phosphatase non-receptor type 13 OS=Mus musculus GN=Ptpn13 PE=1 SV=2	6.49698	0.608025	1.52417		24.1259	8.18709	0.000304552	0.00415935	0.648007	0.0248346	0.312146	0.641541	0.000304552	0.00415935
Bbx	Q8VBW5|Q8VBW5-2|Q8VBW5-3	Q8VBW5	HMG box transcription factor BBX OS=Mus musculus GN=Bbx PE=1 SV=2|Isoform 2 of HMG box transcription factor BBX OS=Mus musculus GN=Bbx|Isoform 3 of HMG box transcription factor BBX OS=Mus musculus GN=Bbx	7.26201	0.607475	1.52359		25.5547	11.0647	6.48878e-05	0.00220377	2.38161	0.002424	0.0742998	0.210038	6.48878e-05	0.00220377
Snrk	Q8VDU5	Q8VDU5	SNF-related serine/threonine-protein kinase OS=Mus musculus GN=Snrk PE=1 SV=1	5.72891	0.605576	1.52159		20.1409	2.72089	0.0385231	0.0802173	-4.80404	0.455814	0.873842	1	0.0385231	0.0802173
Large	Q059X9|Q9Z1M7	Q059X9	Glycosyltransferase-like protein LARGE1 OS=Mus musculus GN=Large PE=1 SV=1|Glycosyltransferase-like protein LARGE1 OS=Mus musculus GN=Large PE=1 SV=1	6.20367	0.604508	1.52046		21.7571	2.85978	0.0324333	0.0712063	-4.61717	0.433142	0.868109	1	0.0324333	0.0712063
Adgra3	Q7TT36	Q7TT36	Adhesion G protein-coupled receptor A3 OS=Mus musculus GN=Adgra3 PE=2 SV=3	6.24658	0.60405	1.51998		22.6826	5.89564	0.00153319	0.00914883	-1.18911	0.106113	0.617225	1	0.00153319	0.00914883
Mocs2	F6ZGI7|Q9Z223-3	F6ZGI7	Molybdopterin synthase sulfur carrier subunit OS=Mus musculus GN=Mocs2 PE=1 SV=1|Isoform 3 of Molybdopterin synthase catalytic subunit OS=Mus musculus GN=Mocs2	6.63482	0.601853	1.51766		22.0026	1.65728	0.154016	0.232986	-6.24336	0.649659	0.908022	1	0.154016	0.232986
Ly75	A2AW86|Q60767	A2AW86	Lymphocyte antigen 75 OS=Mus musculus GN=Ly75 PE=1 SV=1|Lymphocyte antigen 75 OS=Mus musculus GN=Ly75 PE=1 SV=2	6.40729	0.601123	1.5169		22.2646	6.2384	0.00116898	0.00780841	-0.880269	0.0872923	0.570169	1	0.00116898	0.00780841
Hist1h1c	P15864|Q5SZA3	P15864	Histone H1.2 OS=Mus musculus GN=Hist1h1c PE=1 SV=2|Histone H1.2 OS=Mus musculus GN=Hist1h1c PE=1 SV=1	8.7966	0.598541	1.51418		26.2346	3.05848	0.0254814	0.0599494	-4.35325	0.401869	0.85929	1	0.0254814	0.0599494
Ckap2	Q3V1H1	Q3V1H1	Cytoskeleton-associated protein 2 OS=Mus musculus GN=Ckap2 PE=1 SV=1	7.68787	0.597742	1.51335		27.0398	8.91275	0.000197881	0.0033663	1.13497	0.0145715	0.229243	0.641541	0.000197881	0.0033663
Fam102a	Q78T81	Q78T81	Protein FAM102A OS=Mus musculus GN=Fam102a PE=1 SV=1	6.77175	0.595845	1.51136		23.9463	5.47552	0.00217455	0.0111174	-1.58692	0.133417	0.669685	1	0.00217455	0.0111174
Itgav	A2AKI5|P43406	A2AKI5	Integrin alpha-V OS=Mus musculus GN=Itgav PE=1 SV=1|Integrin alpha-V OS=Mus musculus GN=Itgav PE=1 SV=2	7.59793	0.5955	1.511		27.4078	8.0033	0.000341502	0.00434308	0.518348	0.0282649	0.332889	0.641541	0.000341502	0.00434308
Nipsnap3b	B1AWZ5|Q9CQE1	B1AWZ5	Protein NipSnap homolog 3B OS=Mus musculus GN=Nipsnap3b PE=1 SV=1|Protein NipSnap homolog 3B OS=Mus musculus GN=Nipsnap3b PE=1 SV=1	7.16903	0.595175	1.51066		25.1507	8.26243	0.000290774	0.00407645	0.700388	0.0235363	0.303549	0.641541	0.000290774	0.00407645
Hmmr	Q00547	Q00547	Hyaluronan mediated motility receptor OS=Mus musculus GN=Hmmr PE=1 SV=4	7.05038	0.595087	1.51056		26.6424	8.08086	0.000325302	0.00426296	0.573393	0.0267704	0.324182	0.641541	0.000325302	0.00426296
Kiaa1161	Q69ZQ1	Q69ZQ1	Uncharacterized family 31 glucosidase KIAA1161 OS=Mus musculus GN=Kiaa1161 PE=1 SV=2	6.40576	0.593501	1.5089		23.5855	10.4503	8.7289e-05	0.00230786	2.05221	0.00417965	0.10309	0.361993	8.7289e-05	0.00230786
Sort1	Q6PHU5|Q6PHU5-2	Q6PHU5	Sortilin OS=Mus musculus GN=Sort1 PE=1 SV=1|Isoform 2 of Sortilin OS=Mus musculus GN=Sort1	6.67244	0.592069	1.50741		23.6886	5.92981	0.00149149	0.00902964	-1.15771	0.104104	0.612698	1	0.00149149	0.00902964
Vps13a	Q5H8C4	Q5H8C4	Vacuolar protein sorting-associated protein 13A OS=Mus musculus GN=Vps13a PE=1 SV=1	7.10377	0.590036	1.50528		26.1024	10.9418	6.87665e-05	0.00220638	2.31727	0.00270867	0.0797138	0.210038	6.87665e-05	0.00220638
Rad51	F7AT35|Q08297	F7AT35	DNA repair protein RAD51 homolog 1 (Fragment) OS=Mus musculus GN=Rad51 PE=1 SV=1|DNA repair protein RAD51 homolog 1 OS=Mus musculus GN=Rad51 PE=1 SV=1	6.93256	0.588609	1.5038		23.5605	2.37919	0.0594765	0.110802	-5.26948	0.514336	0.886568	1	0.0594765	0.110802
Ubxn6	Q99PL6|Q99PL6-2	Q99PL6	UBX domain-containing protein 6 OS=Mus musculus GN=Ubxn6 PE=1 SV=1|Isoform 2 of UBX domain-containing protein 6 OS=Mus musculus GN=Ubxn6	6.6722	0.58637	1.50146		24.4764	10.9107	6.97927e-05	0.00220638	2.30084	0.00278552	0.0811021	0.210038	6.97927e-05	0.00220638
Ctc1	Q5SUQ9|Q5SUQ9-2	Q5SUQ9	CST complex subunit CTC1 OS=Mus musculus GN=Ctc1 PE=1 SV=2|Isoform 2 of CST complex subunit CTC1 OS=Mus musculus GN=Ctc1	7.66236	0.584042	1.49904		25.8008	9.9128	0.000114677	0.00261341	1.74759	0.00658853	0.139593	0.361993	0.000114677	0.00261341
Uevld	Q3U1V6	Q3U1V6	Ubiquitin-conjugating enzyme E2 variant 3 OS=Mus musculus GN=Uevld PE=1 SV=1	7.0045	0.583738	1.49873		24.5102	10.2107	9.84209e-05	0.00251146	1.9184	0.00513245	0.118874	0.361993	9.84209e-05	0.00251146
Camk1	Q3UY68|Q91YS8	Q3UY68	Calcium/calmodulin-dependent protein kinase I OS=Mus musculus GN=Camk1 PE=1 SV=1|Calcium/calmodulin-dependent protein kinase type 1 OS=Mus musculus GN=Camk1 PE=1 SV=1	7.08703	0.583558	1.49854		23.4047	5.80723	0.00164755	0.00956631	-1.27102	0.111457	0.628763	1	0.00164755	0.00956631
Ube2l3	P68037|Q561N4	P68037	Ubiquitin-conjugating enzyme E2 L3 OS=Mus musculus GN=Ube2l3 PE=1 SV=1|MCG1032217 OS=Mus musculus GN=Ube2l3 PE=1 SV=1	7.9997	0.583063	1.49803		25.9623	9.42307	0.000148822	0.00287099	1.45547	0.0098022	0.176052	0.427881	0.000148822	0.00287099
Fam76a	Q922G2	Q922G2	Protein FAM76A OS=Mus musculus GN=Fam76a PE=2 SV=1	6.88275	0.582938	1.4979		24.146	4.33244	0.00627318	0.0223089	-2.7887	0.235046	0.781266	1	0.00627318	0.0223089
Shroom3	A0A0R4J1H8|E9Q6I3|E9QMY5|Q9QXN0|Q9QXN0-2|Q9QXN0-3|Q9QXN0-4	Q9QXN0	Protein Shroom3 OS=Mus musculus GN=Shroom3 PE=1 SV=1|Protein Shroom3 OS=Mus musculus GN=Shroom3 PE=1 SV=1|Protein Shroom3 OS=Mus musculus GN=Shroom3 PE=1 SV=1|Protein Shroom3 OS=Mus musculus GN=Shroom3 PE=1 SV=2|Isoform 2 of Protein Shroom3 OS=Mus musculus GN=Shroom3|Isoform 3 of Protein Shroom3 OS=Mus musculus GN=Shroom3|Isoform 4 of Protein Shroom3 OS=Mus musculus GN=Shroom3	6.58866	0.581355	1.49625		24.5001	9.47348	0.000144802	0.0028311	1.48622	0.00941662	0.171909	0.427881	0.000144802	0.0028311
Shoc2	O88520	O88520	Leucine-rich repeat protein SHOC-2 OS=Mus musculus GN=Shoc2 PE=1 SV=2	7.19001	0.580808	1.49569		24.6005	5.90845	0.0015174	0.0090919	-1.17733	0.105356	0.615532	1	0.0015174	0.0090919
Fbxo3	Q9DC63|Q9DC63-2	Q9DC63	F-box only protein 3 OS=Mus musculus GN=Fbxo3 PE=1 SV=1|Isoform 2 of F-box only protein 3 OS=Mus musculus GN=Fbxo3	6.39017	0.580423	1.49529		22.0294	10.5126	8.46402e-05	0.00225889	2.08652	0.00395961	0.0991497	0.361993	8.46402e-05	0.00225889
Aurka	P97477|P97477-2	P97477	Aurora kinase A OS=Mus musculus GN=Aurka PE=1 SV=1|Isoform 2 of Aurora kinase A OS=Mus musculus GN=Aurka	7.15649	0.580212	1.49507		25.2547	5.11199	0.00299102	0.0136549	-1.94941	0.161177	0.710082	1	0.00299102	0.0136549
H2-D1	P14426	P14426	H-2 class I histocompatibility antigen, D-K alpha chain OS=Mus musculus GN=H2-D1 PE=1 SV=1	7.16831	0.58007	1.49492		23.438	6.87662	0.000727055	0.0061039	-0.339709	0.059459	0.474663	1	0.000727055	0.0061039
Bach1	P97302|Q3URL4	P97302	Transcription regulator protein BACH1 OS=Mus musculus GN=Bach1 PE=1 SV=1|BTB and CNC homology 1 OS=Mus musculus GN=Bach1 PE=1 SV=1	6.1781	0.580055	1.49491		22.3288	8.52368	0.000248347	0.00382244	0.87868	0.0194798	0.273538	0.641541	0.000248347	0.00382244
Cep68	Q8C0D9	Q8C0D9	Centrosomal protein of 68 kDa OS=Mus musculus GN=Cep68 PE=1 SV=2	5.95186	0.578896	1.49371		21.3735	9.54864	0.000139042	0.00277036	1.53176	0.00886685	0.165761	0.427881	0.000139042	0.00277036
Pld3	O35405	O35405	Phospholipase D3 OS=Mus musculus GN=Pld3 PE=1 SV=1	6.8448	0.578886	1.4937		22.4636	7.37624	0.000513833	0.00514186	0.0548867	0.0432051	0.402806	0.747374	0.000513833	0.00514186
Q9D937	Q9D937	Q9D937	Uncharacterized protein C11orf98 homolog OS=Mus musculus PE=1 SV=1	6.75791	0.577769	1.49254		23.1548	3.10905	0.0239869	0.057454	-4.2868	0.394132	0.856923	1	0.0239869	0.057454
Ppp6r1	Q7TSI3	Q7TSI3	Serine/threonine-protein phosphatase 6 regulatory subunit 1 OS=Mus musculus GN=Ppp6r1 PE=1 SV=1	7.4387	0.576752	1.49149		25.164	10.8162	7.30204e-05	0.00224166	2.25067	0.0030312	0.0853487	0.210038	7.30204e-05	0.00224166
Ikbkg	A3KG44|E9Q2Y3|O88522|Q7TSS3|Q8VC91	A3KG44	NF-kappa-B essential modulator (Fragment) OS=Mus musculus GN=Ikbkg PE=1 SV=1|NF-kappa-B essential modulator OS=Mus musculus GN=Ikbkg PE=1 SV=1|NF-kappa-B essential modulator OS=Mus musculus GN=Ikbkg PE=1 SV=2|Inhibitor of kappaB kinase gamma OS=Mus musculus GN=Ikbkg PE=1 SV=1|Ikbkg protein OS=Mus musculus GN=Ikbkg PE=1 SV=1	7.45024	0.576673	1.49141		25.3666	7.99022	0.000344327	0.00434308	0.509017	0.0285239	0.334349	0.641541	0.000344327	0.00434308
Nxf3	Q4ZGD9	Q4ZGD9	Nuclear export factor 3 OS=Mus musculus GN=Nxf3 PE=1 SV=1	6.22947	0.5766	1.49133		21.224	9.42636	0.000148555	0.00287099	1.45748	0.00977659	0.175781	0.427881	0.000148555	0.00287099
Pdcd4	Q61823	Q61823	Programmed cell death protein 4 OS=Mus musculus GN=Pdcd4 PE=1 SV=1	7.07861	0.576438	1.49116		24.5602	5.68549	0.00182162	0.0100457	-1.38537	0.11916	0.644223	1	0.00182162	0.0100457
Nab1	E9PZ64|Q61122	E9PZ64	NGFI-A-binding protein 1 OS=Mus musculus GN=Nab1 PE=1 SV=1|NGFI-A-binding protein 1 OS=Mus musculus GN=Nab1 PE=1 SV=2	6.69356	0.575462	1.49015		24.7076	4.15115	0.00754321	0.0252349	-2.99666	0.255216	0.795009	1	0.00754321	0.0252349
Sharpin	Q91WA6	Q91WA6	Sharpin OS=Mus musculus GN=Sharpin PE=1 SV=1	6.34401	0.575237	1.48992		22.3777	5.84235	0.00160098	0.00939908	-1.23837	0.10931	0.624211	1	0.00160098	0.00939908
Zfyve1	Q810J8	Q810J8	Zinc finger FYVE domain-containing protein 1 OS=Mus musculus GN=Zfyve1 PE=1 SV=2	6.66548	0.575152	1.48983		23.8861	7.88915	0.000367097	0.00451537	0.436457	0.0305947	0.345548	0.641541	0.000367097	0.00451537
Tradd	B2RRZ7|Q3U0V2	B2RRZ7	TNFRSF1A-associated via death domain OS=Mus musculus GN=Tradd PE=1 SV=1|Tumor necrosis factor receptor type 1-associated DEATH domain protein OS=Mus musculus GN=Tradd PE=1 SV=1	6.42865	0.570879	1.48543		22.4405	7.5301	0.000463582	0.00485967	0.171752	0.0390278	0.383863	0.747374	0.000463582	0.00485967
Ift140	E9PY46|E9Q682	E9PY46	Protein Ift140 OS=Mus musculus GN=Ift140 PE=1 SV=1|Protein Ift140 (Fragment) OS=Mus musculus GN=Ift140 PE=1 SV=1	6.67767	0.568778	1.48327		24.1062	8.32543	0.000279813	0.00400968	0.743852	0.0224963	0.296331	0.641541	0.000279813	0.00400968
Katnb1	Q8BG40	Q8BG40	Katanin p80 WD40 repeat-containing subunit B1 OS=Mus musculus GN=Katnb1 PE=1 SV=1	6.71411	0.566817	1.48125		24.5422	2.31431	0.0646901	0.118255	-5.35832	0.525872	0.88878	1	0.0646901	0.118255
Znf516	Q7TSH3	Q7TSH3	Zinc finger protein 516 OS=Mus musculus GN=Znf516 PE=1 SV=1	6.96122	0.565885	1.4803		26.1013	8.58974	0.000238799	0.00375496	0.922954	0.0185564	0.265947	0.641541	0.000238799	0.00375496
Fbxl3	Q8C4V4|Q8C4V4-2	Q8C4V4	F-box/LRR-repeat protein 3 OS=Mus musculus GN=Fbxl3 PE=1 SV=1|Isoform 2 of F-box/LRR-repeat protein 3 OS=Mus musculus GN=Fbxl3	5.61777	0.565674	1.48008		23.6819	7.08107	0.000629229	0.0056582	-0.175358	0.0522799	0.442725	1	0.000629229	0.0056582
Tbcel	Q8C5W3|Q8C5W3-2	Q8C5W3	Tubulin-specific chaperone cofactor E-like protein OS=Mus musculus GN=Tbcel PE=1 SV=1|Isoform 2 of Tubulin-specific chaperone cofactor E-like protein OS=Mus musculus GN=Tbcel	7.88448	0.565634	1.48004		26.1066	10.167	0.000100628	0.0025235	1.89364	0.00532608	0.121849	0.361993	0.000100628	0.0025235
Gns	Q8BFR4	Q8BFR4	N-acetylglucosamine-6-sulfatase OS=Mus musculus GN=Gns PE=1 SV=1	7.64209	0.565503	1.4799		26.1798	6.65951	0.000850974	0.00660129	-0.518793	0.0679591	0.508045	1	0.000850974	0.00660129
Rab11fip5	A0A0N4SW73	Q8R361	Rab11 family-interacting protein 5 OS=Mus musculus GN=Rab11fip5 PE=1 SV=1	7.60298	0.563426	1.47777		26.3897	7.60145	0.000442245	0.00478157	0.225233	0.0372103	0.376426	0.641541	0.000442245	0.00478157
Ctnnd1	D3Z2H2|E9Q8Z4|E9Q8Z5|E9Q8Z6|E9Q8Z8|E9Q8Z9|E9Q901|E9Q903|E9Q904|G3X9V2|P30999|P30999-2|P30999-3	D3Z2H2	Catenin delta-1 OS=Mus musculus GN=Ctnnd1 PE=1 SV=1|Catenin delta-1 OS=Mus musculus GN=Ctnnd1 PE=1 SV=1|Catenin delta-1 OS=Mus musculus GN=Ctnnd1 PE=1 SV=1|Catenin delta-1 OS=Mus musculus GN=Ctnnd1 PE=1 SV=1|Catenin delta-1 OS=Mus musculus GN=Ctnnd1 PE=1 SV=1|Catenin delta-1 OS=Mus musculus GN=Ctnnd1 PE=1 SV=1|Catenin delta-1 OS=Mus musculus GN=Ctnnd1 PE=1 SV=1|Catenin delta-1 OS=Mus musculus GN=…	6.73321	0.561943	1.47626		23.8028	2.86565	0.0322005	0.07099	-4.60932	0.4322	0.86786	1	0.0322005	0.07099
Ankrd40	Q5SUE8|Q5SUE8-2|Q5SUE8-3	Q5SUE8	Ankyrin repeat domain-containing protein 40 OS=Mus musculus GN=Ankrd40 PE=1 SV=1|Isoform 2 of Ankyrin repeat domain-containing protein 40 OS=Mus musculus GN=Ankrd40|Isoform 3 of Ankyrin repeat domain-containing protein 40 OS=Mus musculus GN=Ankrd40	6.04747	0.561208	1.4755		21.6574	10.193	9.93045e-05	0.00251197	1.90842	0.00520981	0.120071	0.361993	9.93045e-05	0.00251197
Akr1b1|Akr1b3	P45376|Q3UDY1	P45376	Aldose reductase OS=Mus musculus GN=Akr1b1 PE=1 SV=3|Aldose reductase OS=Mus musculus GN=Akr1b3 PE=1 SV=1	9.04808	0.56048	1.47476		28.497	6.65389	0.000854496	0.00661934	-0.523493	0.0681918	0.5089	1	0.000854496	0.00661934
Akr1b8	P45377	P45377	Aldose reductase-related protein 2 OS=Mus musculus GN=Akr1b8 PE=1 SV=2	7.27122	0.558839	1.47308		24.2885	6.91002	0.000709921	0.00601608	-0.31258	0.0582332	0.469471	1	0.000709921	0.00601608
Sptan1	A3KGU5|E9Q447|P16546|P16546-2	A3KGU5	Spectrin alpha chain, non-erythrocytic 1 OS=Mus musculus GN=Sptan1 PE=1 SV=1|Spectrin alpha chain, non-erythrocytic 1 OS=Mus musculus GN=Sptan1 PE=1 SV=1|Spectrin alpha chain, non-erythrocytic 1 OS=Mus musculus GN=Sptan1 PE=1 SV=4|Isoform 2 of Spectrin alpha chain, non-erythrocytic 1 OS=Mus musculus GN=Sptan1	8.64294	0.558355	1.47259		30.0953	9.99646	0.000109812	0.00261104	1.79607	0.00614604	0.13368	0.361993	0.000109812	0.00261104
Ube2c	A2A4Z0|Q9D1C1	A2A4Z0	Ubiquitin-conjugating enzyme E2 C OS=Mus musculus GN=Ube2c PE=1 SV=1|Ubiquitin-conjugating enzyme E2 C OS=Mus musculus GN=Ube2c PE=1 SV=1	7.09395	0.557775	1.472		25.0913	5.22882	0.00269506	0.0127999	-1.83099	0.151816	0.697611	1	0.00269506	0.0127999
Hspb1	P14602|P14602-2	P14602	Heat shock protein beta-1 OS=Mus musculus GN=Hspb1 PE=1 SV=3|Isoform B of Heat shock protein beta-1 OS=Mus musculus GN=Hspb1	8.74978	0.554693	1.46886		26.8384	7.78724	0.000391867	0.00463391	0.362432	0.0328124	0.356671	0.641541	0.000391867	0.00463391
Pls1	Q3V0K9	Q3V0K9	Plastin-1 OS=Mus musculus GN=Pls1 PE=1 SV=1	7.25148	0.553046	1.46718		25.6691	9.55255	0.00013875	0.00277036	1.53412	0.00883905	0.165479	0.361993	0.00013875	0.00277036
Kif20a	P97329	P97329	Kinesin-like protein KIF20A OS=Mus musculus GN=Kif20a PE=2 SV=1	7.2775	0.552926	1.46706		26.0344	6.10043	0.00130196	0.00835148	-1.00295	0.0945162	0.589536	1	0.00130196	0.00835148
Dennd4c	A6H8H2-2	A6H8H2	Isoform 2 of DENN domain-containing protein 4C OS=Mus musculus GN=Dennd4c	7.29583	0.55024	1.46433		26.8002	9.98762	0.000110314	0.00261104	1.79097	0.00619146	0.134302	0.361993	0.000110314	0.00261104
Morf4l1	P60762|P60762-2	P60762	Mortality factor 4-like protein 1 OS=Mus musculus GN=Morf4l1 PE=1 SV=2|Isoform 2 of Mortality factor 4-like protein 1 OS=Mus musculus GN=Morf4l1	6.92238	0.549793	1.46388		22.6484	5.77187	0.00169604	0.00971215	-1.30405	0.113652	0.633305	1	0.00169604	0.00971215
Ndrg2	Q9QYG0|Q9QYG0-2	Q9QYG0	Protein NDRG2 OS=Mus musculus GN=Ndrg2 PE=1 SV=1|Isoform 2 of Protein NDRG2 OS=Mus musculus GN=Ndrg2	7.57387	0.549643	1.46372		25.1888	6.59336	0.000893516	0.00678652	-0.574318	0.0707393	0.518062	1	0.000893516	0.00678652
Hspg2	E9PZ16|Q05793	E9PZ16	Basement membrane-specific heparan sulfate proteoglycan core protein OS=Mus musculus GN=Hspg2 PE=1 SV=1|Basement membrane-specific heparan sulfate proteoglycan core protein OS=Mus musculus GN=Hspg2 PE=1 SV=1	6.95228	0.549367	1.46344		25.9374	8.06707	0.000328115	0.00426978	0.563643	0.027031	0.325735	0.641541	0.000328115	0.00426978
Enpp5	Q9EQG7	Q9EQG7	Ectonucleotide pyrophosphatase/phosphodiesterase family member 5 OS=Mus musculus GN=Enpp5 PE=1 SV=3	6.74028	0.549263	1.46334		23.3119	9.9215	0.000114159	0.00261341	1.75265	0.00654121	0.138976	0.361993	0.000114159	0.00261341
Tns3	Q5SSZ5	Q5SSZ5	Tensin-3 OS=Mus musculus GN=Tns3 PE=1 SV=1	7.31003	0.548695	1.46276		24.7755	9.32215	0.000157272	0.00293265	1.39343	0.0106167	0.185198	0.60999	0.000157272	0.00293265
Chmp2b	Q8BJF9	Q8BJF9	Charged multivesicular body protein 2b OS=Mus musculus GN=Chmp2b PE=1 SV=1	7.75687	0.54636	1.4604		25.544	9.18991	0.000169215	0.00305325	1.31115	0.0117748	0.198885	0.641541	0.000169215	0.00305325
Fbxw8	Q8BIA4|Q8BIA4-4	Q8BIA4	F-box/WD repeat-containing protein 8 OS=Mus musculus GN=Fbxw8 PE=1 SV=2|Isoform 2 of F-box/WD repeat-containing protein 8 OS=Mus musculus GN=Fbxw8	6.2032	0.545766	1.45979		21.9294	8.32425	0.000280013	0.00400968	0.74304	0.0225155	0.296467	0.641541	0.000280013	0.00400968
Hook3	Q8BUK6	Q8BUK6	Protein Hook homolog 3 OS=Mus musculus GN=Hook3 PE=1 SV=2	7.24523	0.544966	1.45899		25.8115	3.17347	0.0222222	0.0544834	-4.20263	0.384409	0.853833	1	0.0222222	0.0544834
Epn2	J3QNT7|Q5NCM5|Q5NCM6|Q8CHU3-2	J3QNT7	Epsin-2 OS=Mus musculus GN=Epn2 PE=1 SV=1|Epsin-2 OS=Mus musculus GN=Epn2 PE=1 SV=1|Epsin-2 OS=Mus musculus GN=Epn2 PE=1 SV=1|Isoform 2 of Epsin-2 OS=Mus musculus GN=Epn2	7.02637	0.544884	1.4589		24.4774	8.00807	0.00034048	0.00434308	0.521745	0.028171	0.332356	0.641541	0.00034048	0.00434308
Naglu	O88325	O88325	Alpha-N-acetylglucosaminidase OS=Mus musculus GN=Naglu PE=1 SV=1	7.41199	0.542322	1.45631		24.5388	7.40396	0.000504324	0.00510453	0.0761031	0.0424256	0.399422	0.747374	0.000504324	0.00510453
Chpf2	Q3UU43	Q3UU43	MCG16489, isoform CRA_a OS=Mus musculus GN=Chpf2 PE=1 SV=1	6.47163	0.542144	1.45613		23.1786	9.77252	0.000123415	0.0026777	1.66539	0.00739506	0.149619	0.361993	0.000123415	0.0026777
Sowahb	Q8BZW2	Q8BZW2	Ankyrin repeat domain-containing protein SOWAHB OS=Mus musculus GN=Sowahb PE=1 SV=1	6.173	0.541638	1.45562		22.9654	8.12797	0.000315902	0.0042292	0.60659	0.0258965	0.318859	0.641541	0.000315902	0.0042292
Klhl22	H9KV05|Q99JN2|Q99JN2-2	Q99JN2	Kelch-like protein 22 OS=Mus musculus GN=Klhl22 PE=1 SV=1|Kelch-like protein 22 OS=Mus musculus GN=Klhl22 PE=1 SV=1|Isoform 2 of Kelch-like protein 22 OS=Mus musculus GN=Klhl22	6.57388	0.541128	1.45511		23.9704	7.8639	0.00037306	0.00457904	0.418192	0.0311319	0.348322	0.641541	0.00037306	0.00457904
Cacnb3	D3Z3Z3|P54285	D3Z3Z3	Voltage-dependent L-type calcium channel subunit beta-3 OS=Mus musculus GN=Cacnb3 PE=1 SV=1|Voltage-dependent L-type calcium channel subunit beta-3 OS=Mus musculus GN=Cacnb3 PE=1 SV=2	6.40369	0.537874	1.45183		21.6664	7.3545	0.000521433	0.00514186	0.0382073	0.0438246	0.405448	0.747374	0.000521433	0.00514186
Ryden	Q8CAK3|Q8CAK3-2	Q8CAK3	Repressor of yield of DENV protein homolog OS=Mus musculus GN=Ryden PE=2 SV=1|Isoform 2 of Repressor of yield of DENV protein homolog OS=Mus musculus GN=Ryden	6.64349	0.536306	1.45025		22.4595	6.31246	0.00110415	0.00764949	-0.815296	0.0836023	0.559553	1	0.00110415	0.00764949
Lipe	P54310-2	P54310	Isoform 2 of Hormone-sensitive lipase OS=Mus musculus GN=Lipe	6.60822	0.535289	1.44923		24.0194	8.30509	0.000283297	0.00402989	0.729854	0.0228276	0.298663	0.641541	0.000283297	0.00402989
Ttc26	Q8BS45	Q8BS45	Intraflagellar transport protein 56 OS=Mus musculus GN=Ttc26 PE=1 SV=1	5.72665	0.534378	1.44832		20.8954	4.46129	0.00551865	0.0203212	-2.64388	0.221414	0.770885	1	0.00551865	0.0203212
Mgst1	E9QJW0|Q53ZD4|Q91VS7	E9QJW0	Microsomal glutathione S-transferase 1 OS=Mus musculus GN=Mgst1 PE=1 SV=1|Microsomal glutathione S-transferase 1 OS=Mus musculus GN=Mgst1 PE=1 SV=1|Microsomal glutathione S-transferase 1 OS=Mus musculus GN=Mgst1 PE=1 SV=3	7.99549	0.533159	1.44709		25.5384	4.59194	0.0048578	0.0185756	-2.49955	0.20818	0.759818	1	0.0048578	0.0185756
Mdk	P12025	P12025	Midkine OS=Mus musculus GN=Mdk PE=2 SV=2	7.00279	0.532585	1.44652		23.0693	5.64974	0.00187672	0.0101932	-1.41929	0.121499	0.648666	1	0.00187672	0.0101932
Ppil2	Q9D787	Q9D787	Peptidyl-prolyl cis-trans isomerase-like 2 OS=Mus musculus GN=Ppil2 PE=1 SV=2	7.3051	0.532392	1.44633		26.2993	5.44806	0.00222633	0.0113422	-1.61369	0.135376	0.6729	1	0.00222633	0.0113422
Stmn1	P54227|Q545B6	P54227	Stathmin OS=Mus musculus GN=Stmn1 PE=1 SV=2|MCG12955, isoform CRA_a OS=Mus musculus GN=Stmn1 PE=1 SV=1	8.33046	0.532292	1.44622		27.2079	6.7983	0.000769164	0.00623258	-0.403766	0.0624178	0.486785	1	0.000769164	0.00623258
Hp1bp3	Q3TEA8-2	Q3TEA8	Isoform 2 of Heterochromatin protein 1-binding protein 3 OS=Mus musculus GN=Hp1bp3	8.17481	0.531012	1.44494		27.7546	9.9262	0.00011388	0.00261341	1.75539	0.00651574	0.138642	0.361993	0.00011388	0.00261341
Lrrcc1	E9QNC6|G5E8Y2|Q69ZB0|Q69ZB0-2	E9QNC6	Leucine-rich repeat and coiled-coil domain-containing protein 1 OS=Mus musculus GN=Lrrcc1 PE=1 SV=1|Leucine rich repeat and coiled-coil domain containing 1, isoform CRA_a OS=Mus musculus GN=Lrrcc1 PE=1 SV=1|Leucine-rich repeat and coiled-coil domain-containing protein 1 OS=Mus musculus GN=Lrrcc1 PE=2 SV=2|Isoform 2 of Leucine-rich repeat and coiled-coil domain-containing protein 1 OS=Mus musculus…	6.80968	0.530586	1.44452		24.2321	6.51628	0.00094626	0.00700425	-0.639606	0.0740962	0.529626	1	0.00094626	0.00700425
Bcam	Q9R069	Q9R069	Basal cell adhesion molecule OS=Mus musculus GN=Bcam PE=1 SV=1	7.93194	0.530444	1.44437		26.6989	7.82193	0.000383222	0.00463104	0.387726	0.0320425	0.352906	0.641541	0.000383222	0.00463104
Acsf2	Q8VCW8	Q8VCW8	Acyl-CoA synthetase family member 2, mitochondrial OS=Mus musculus GN=Acsf2 PE=1 SV=1	7.92892	0.52985	1.44378		26.4434	8.99774	0.000188523	0.00325468	1.18954	0.0136573	0.219789	0.641541	0.000188523	0.00325468
Fyco1	Q8VDC1	Q8VDC1	FYVE and coiled-coil domain-containing protein 1 OS=Mus musculus GN=Fyco1 PE=1 SV=1	7.21784	0.529547	1.44348		26.5209	9.9795	0.000110778	0.00261104	1.78628	0.0062335	0.134874	0.361993	0.000110778	0.00261104
Unkl	E0CYD7|Q5FWH2	E0CYD7	Putative E3 ubiquitin-protein ligase UNKL OS=Mus musculus GN=Unkl PE=1 SV=1|Putative E3 ubiquitin-protein ligase UNKL OS=Mus musculus GN=Unkl PE=2 SV=2	6.47024	0.52942	1.44335		24.8621	4.97925	0.00337386	0.0147366	-2.08621	0.172334	0.723665	1	0.00337386	0.0147366
Cnpy2	Q9QXT0	Q9QXT0	Protein canopy homolog 2 OS=Mus musculus GN=Cnpy2 PE=1 SV=1	7.25464	0.529245	1.44317		24.2159	3.39525	0.0171662	0.0453143	-3.91697	0.352066	0.84252	1	0.0171662	0.0453143
Fam160b1	Q8CDM8	Q8CDM8	Protein FAM160B1 OS=Mus musculus GN=Fam160b1 PE=1 SV=2	7.19639	0.52897	1.4429		23.8861	8.54919	0.000244608	0.00379917	0.895812	0.0191186	0.270606	0.641541	0.000244608	0.00379917
Dync1li2	Q6PDL0	Q6PDL0	Cytoplasmic dynein 1 light intermediate chain 2 OS=Mus musculus GN=Dync1li2 PE=1 SV=2	7.08559	0.525694	1.43963		24.9662	5.67924	0.00183111	0.0100789	-1.39128	0.119566	0.645003	1	0.00183111	0.0100789
Golga1	Q9CW79	Q9CW79	Golgin subfamily A member 1 OS=Mus musculus GN=Golga1 PE=1 SV=2	6.78395	0.525345	1.43928		23.0778	8.89426	0.000199989	0.00337256	1.12303	0.0147773	0.231314	0.641541	0.000199989	0.00337256
Ppp1r12c	Q3UMT1	Q3UMT1	Protein phosphatase 1 regulatory subunit 12C OS=Mus musculus GN=Ppp1r12c PE=1 SV=1	6.608	0.524775	1.43871		24.4481	7.97159	0.000348397	0.00436964	0.495704	0.0288963	0.336425	0.641541	0.000348397	0.00436964
Ubxn1	Q922Y1	Q922Y1	UBX domain-containing protein 1 OS=Mus musculus GN=Ubxn1 PE=1 SV=1	7.76299	0.524621	1.43856		25.5576	7.99152	0.000344046	0.00434308	0.509944	0.0284981	0.334204	0.641541	0.000344046	0.00434308
Man2b2	O54782	O54782	Epididymis-specific alpha-mannosidase OS=Mus musculus GN=Man2b2 PE=1 SV=2	7.20689	0.524052	1.43799		25.3154	9.48571	0.000143845	0.0028311	1.49365	0.00932512	0.170906	0.427881	0.000143845	0.0028311
Kpna1	Q60960	Q60960	Importin subunit alpha-5 OS=Mus musculus GN=Kpna1 PE=1 SV=2	7.30909	0.523278	1.43722		25.2412	9.31638	0.000157772	0.00293265	1.38987	0.010665	0.185784	0.60999	0.000157772	0.00293265
Prpsap2	Q5SWZ0|Q8R574	Q5SWZ0	Phosphoribosyl pyrophosphate synthase-associated protein 2 OS=Mus musculus GN=Prpsap2 PE=1 SV=1|Phosphoribosyl pyrophosphate synthase-associated protein 2 OS=Mus musculus GN=Prpsap2 PE=1 SV=1	6.98321	0.523278	1.43722		25.4935	2.89521	0.0310546	0.0691979	-4.56981	0.427466	0.866592	1	0.0310546	0.0691979
Rab11fip1	E9Q8L9	E9Q8L9	Rab11 family-interacting protein 1 OS=Mus musculus GN=Rab11fip1 PE=1 SV=1	7.21324	0.522769	1.43671		25.5514	9.21854	0.000166541	0.00301914	1.32907	0.0115149	0.195836	0.60999	0.000166541	0.00301914
Atp2c1	H3BIX7|H3BL44|H3BLI6|Q3UZR5|Q80XR2|Q8BMS7	H3BIX7	Calcium-transporting ATPase OS=Mus musculus GN=Atp2c1 PE=1 SV=1|Calcium-transporting ATPase OS=Mus musculus GN=Atp2c1 PE=1 SV=1|Calcium-transporting ATPase type 2C member 1 (Fragment) OS=Mus musculus GN=Atp2c1 PE=1 SV=1|Calcium-transporting ATPase OS=Mus musculus GN=Atp2c1 PE=1 SV=1|Calcium-transporting ATPase type 2C member 1 OS=Mus musculus GN=Atp2c1 PE=1 SV=2|Calcium-transporting ATPase OS=Mus…	6.39243	0.522171	1.43611		21.6978	6.6506	0.000856568	0.00661934	-0.52625	0.0683285	0.5094	1	0.000856568	0.00661934
Cnpy3	Q9DAU1	Q9DAU1	Protein canopy homolog 3 OS=Mus musculus GN=Cnpy3 PE=1 SV=1	6.76868	0.51913	1.43309		24.8679	6.73186	0.000807124	0.00638023	-0.458583	0.065022	0.497001	1	0.000807124	0.00638023
Abcc5	Q9R1X5	Q9R1X5	Multidrug resistance-associated protein 5 OS=Mus musculus GN=Abcc5 PE=1 SV=2	7.24232	0.518831	1.43279		25.9578	7.36331	0.000518336	0.00514186	0.0449757	0.0435725	0.404378	0.747374	0.000518336	0.00514186
Camsap3	Q80VC9|Q80VC9-2	Q80VC9	Calmodulin-regulated spectrin-associated protein 3 OS=Mus musculus GN=Camsap3 PE=1 SV=1|Isoform 2 of Calmodulin-regulated spectrin-associated protein 3 OS=Mus musculus GN=Camsap3	6.64866	0.518403	1.43237		24.5566	9.6752	0.00012994	0.00272921	1.60768	0.00800558	0.156626	0.361993	0.00012994	0.00272921
Glg1	F8WHM5|Q53WR6|Q61543	F8WHM5	Golgi apparatus protein 1 (Fragment) OS=Mus musculus GN=Glg1 PE=1 SV=1|E-selectin ligand 1 OS=Mus musculus GN=Glg1 PE=1 SV=1|Golgi apparatus protein 1 OS=Mus musculus GN=Glg1 PE=1 SV=1	8.07201	0.51645	1.43043		27.6423	7.40283	0.000504707	0.00510453	0.0752406	0.0424571	0.39956	0.747374	0.000504707	0.00510453
Tmc8	Q7TN58|Q7TN58-2	Q7TN58	Transmembrane channel-like protein 8 OS=Mus musculus GN=Tmc8 PE=1 SV=2|Isoform 2 of Transmembrane channel-like protein 8 OS=Mus musculus GN=Tmc8	6.54937	0.516415	1.4304		22.4716	6.72083	0.000813635	0.00641183	-0.467727	0.0654628	0.49869	1	0.000813635	0.00641183
Samd4a	Q8CBY1|Q8CBY1-2	Q8CBY1	Protein Smaug homolog 1 OS=Mus musculus GN=Samd4a PE=1 SV=2|Isoform 2 of Protein Smaug homolog 1 OS=Mus musculus GN=Samd4a	6.71402	0.515759	1.42975		23.5658	8.12246	0.000316985	0.0042292	0.602717	0.0259974	0.319482	0.641541	0.000316985	0.0042292
8030474K03Rik	E9Q4Y8|F6R3T1	E9Q4Y8	Protein 8030474K03Rik OS=Mus musculus GN=8030474K03Rik PE=1 SV=2|Protein 8030474K03Rik (Fragment) OS=Mus musculus GN=8030474K03Rik PE=1 SV=1	7.77829	0.514276	1.42828		26.8227	8.19083	0.00030385	0.00415935	0.650618	0.0247687	0.31172	0.641541	0.00030385	0.00415935
Palld	Q9ET54|Q9ET54-6	Q9ET54	Palladin OS=Mus musculus GN=Palld PE=1 SV=2|Isoform 6 of Palladin OS=Mus musculus GN=Palld	6.90956	0.514247	1.42825		25.679	8.75059	0.000217296	0.00359155	1.02945	0.0164664	0.247551	0.641541	0.000217296	0.00359155
Pawr	Q925B0|Q925B0-2	Q925B0	PRKC apoptosis WT1 regulator protein OS=Mus musculus GN=Pawr PE=1 SV=2|Isoform 2 of PRKC apoptosis WT1 regulator protein OS=Mus musculus GN=Pawr	6.83945	0.514198	1.4282		24.4421	2.84556	0.0330058	0.0721367	-4.63623	0.435434	0.868712	1	0.0330058	0.0721367
Bicd2	D3Z390|Q921C5|Q921C5-2	D3Z390	Bicaudal D homolog 2 (Drosophila), isoform CRA_a OS=Mus musculus GN=Bicd2 PE=1 SV=2|Protein bicaudal D homolog 2 OS=Mus musculus GN=Bicd2 PE=1 SV=1|Isoform 2 of Protein bicaudal D homolog 2 OS=Mus musculus GN=Bicd2	6.5694	0.513739	1.42775		24.2285	6.88176	0.00072439	0.0061039	-0.335532	0.0592692	0.473866	1	0.00072439	0.0061039
Ccdc43	E9Q2S9|Q9CR29|Q9CR29-2	E9Q2S9	Coiled-coil domain-containing protein 43 OS=Mus musculus GN=Ccdc43 PE=1 SV=1|Coiled-coil domain-containing protein 43 OS=Mus musculus GN=Ccdc43 PE=1 SV=1|Isoform 2 of Coiled-coil domain-containing protein 43 OS=Mus musculus GN=Ccdc43	7.0513	0.513491	1.4275		23.472	3.14059	0.0231043	0.0559388	-4.24553	0.389353	0.855421	1	0.0231043	0.0559388
Cggbp1	Q8BHG9	Q8BHG9	CGG triplet repeat-binding protein 1 OS=Mus musculus GN=Cggbp1 PE=1 SV=1	7.21346	0.510642	1.42468		24.6524	6.26528	0.00114495	0.00775075	-0.856617	0.0859381	0.566333	1	0.00114495	0.00775075
Carkd|Naxd	J3QMM7|K3W4M4|Q9CZ42|Q9CZ42-3	J3QMM7	ATP-dependent (S)-NAD(P)H-hydrate dehydratase OS=Mus musculus GN=Carkd PE=1 SV=1|ATP-dependent (S)-NAD(P)H-hydrate dehydratase OS=Mus musculus GN=Carkd PE=1 SV=1|ATP-dependent (S)-NAD(P)H-hydrate dehydratase OS=Mus musculus GN=Naxd PE=1 SV=1|Isoform 3 of ATP-dependent (S)-NAD(P)H-hydrate dehydratase OS=Mus musculus GN=Naxd	7.53852	0.510403	1.42445		24.9726	8.92311	0.000196712	0.00335622	1.14165	0.0144572	0.228085	0.641541	0.000196712	0.00335622
Mafg	O54790	O54790	Transcription factor MafG OS=Mus musculus GN=Mafg PE=1 SV=1	7.2062	0.50574	1.41985		24.0275	5.40213	0.00231617	0.0116154	-1.65869	0.138701	0.678219	1	0.00231617	0.0116154
Caskin2	Q8VHK1	Q8VHK1	Caskin-2 OS=Mus musculus GN=Caskin2 PE=1 SV=3	6.15982	0.505186	1.41931		21.2304	6.24969	0.00115882	0.00777625	-0.870329	0.0867217	0.568561	1	0.00115882	0.00777625
Nfx1	B1AY10	B1AY10	Transcriptional repressor NF-X1 OS=Mus musculus GN=Nfx1 PE=1 SV=1	7.52331	0.502008	1.41618		26.212	8.05568	0.000330462	0.0042725	0.555572	0.027248	0.327017	0.641541	0.000330462	0.0042725
Ass1	P16460|Q3UJ34	P16460	Argininosuccinate synthase OS=Mus musculus GN=Ass1 PE=1 SV=1|Argininosuccinate synthase OS=Mus musculus GN=Ass1 PE=1 SV=1	8.52207	0.501269	1.41546		27.0708	4.71113	0.00433303	0.0171928	-2.37005	0.196615	0.749233	1	0.00433303	0.0171928
Erbb2	P70424	P70424	Receptor tyrosine-protein kinase erbB-2 OS=Mus musculus GN=Erbb2 PE=1 SV=3	6.55007	0.500826	1.41502		23.4566	7.17444	0.000589724	0.00548962	-0.101645	0.049251	0.428634	0.811024	0.000589724	0.00548962
Pcbd1	P61458	P61458	Pterin-4-alpha-carbinolamine dehydratase OS=Mus musculus GN=Pcbd1 PE=1 SV=2	6.52277	0.500613	1.41481		23.8261	9.37843	0.000152493	0.0028798	1.42811	0.0101554	0.179731	0.427881	0.000152493	0.0028798
Usp1	Q8BJQ2	Q8BJQ2	Ubiquitin carboxyl-terminal hydrolase 1 OS=Mus musculus GN=Usp1 PE=1 SV=1	6.61902	0.500102	1.41431		23.6038	2.84356	0.0330869	0.0722325	-4.6389	0.435756	0.868797	1	0.0330869	0.0722325
Mier1	Q5UAK0|Q5UAK0-1|Q5UAK0-2|Q5UAK0-4|Q5UAK0-5	Q5UAK0	Mesoderm induction early response protein 1 OS=Mus musculus GN=Mier1 PE=1 SV=2|Isoform 1 of Mesoderm induction early response protein 1 OS=Mus musculus GN=Mier1|Isoform 2 of Mesoderm induction early response protein 1 OS=Mus musculus GN=Mier1|Isoform 4 of Mesoderm induction early response protein 1 OS=Mus musculus GN=Mier1|Isoform 5 of Mesoderm induction early response protein 1 OS=Mus musculus G…	6.59222	0.49853	1.41277		22.9359	5.80013	0.00165715	0.0096029	-1.27764	0.111895	0.629679	1	0.00165715	0.0096029
Zer1	Q80ZJ6|Q80ZJ6-2	Q80ZJ6	Protein zer-1 homolog OS=Mus musculus GN=Zer1 PE=1 SV=1|Isoform 2 of Protein zer-1 homolog OS=Mus musculus GN=Zer1	5.93324	0.495008	1.40933		21.2457	4.10679	0.00789704	0.0260755	-3.04829	0.260329	0.798223	1	0.00789704	0.0260755
Jade3	A0A140T8R5|Q6IE82	Q6IE82	Protein Jade-3 OS=Mus musculus GN=Jade3 PE=1 SV=1|Protein Jade-3 OS=Mus musculus GN=Jade3 PE=1 SV=1	6.85213	0.494957	1.40928		23.819	6.41985	0.00101743	0.00739	-0.722164	0.0784773	0.543908	1	0.00101743	0.00739
Rbp1	Q00915|Q58EU7	Q00915	Retinol-binding protein 1 OS=Mus musculus GN=Rbp1 PE=1 SV=2|Rbp1 protein OS=Mus musculus GN=Rbp1 PE=1 SV=1	7.66848	0.494657	1.40899		24.1891	3.7919	0.0110283	0.0328701	-3.42342	0.298663	0.819445	1	0.0110283	0.0328701
Hps6	Q8BLY7	Q8BLY7	Hermansky-Pudlak syndrome 6 protein homolog OS=Mus musculus GN=Hps6 PE=1 SV=3	6.18777	0.494591	1.40892		21.4076	7.07323	0.000632685	0.00566302	-0.181587	0.0525412	0.443955	1	0.000632685	0.00566302
Ccdc88a	Q5SNZ0|Q5SNZ0-2	Q5SNZ0	Girdin OS=Mus musculus GN=Ccdc88a PE=1 SV=2|Isoform 2 of Girdin OS=Mus musculus GN=Ccdc88a	7.27239	0.491545	1.40595		27.1348	9.23112	0.000165382	0.00301627	1.33692	0.0114024	0.194533	0.60999	0.000165382	0.00301627
Zcchc2	Q69ZB8|Q69ZB8-2	Q69ZB8	Zinc finger CCHC domain-containing protein 2 OS=Mus musculus GN=Zcchc2 PE=2 SV=3|Isoform 2 of Zinc finger CCHC domain-containing protein 2 OS=Mus musculus GN=Zcchc2	6.07948	0.49146	1.40587		22.3792	3.19874	0.0215697	0.0533329	-4.16975	0.380634	0.852597	1	0.0215697	0.0533329
Mrps15	Q9DC71	Q9DC71	28S ribosomal protein S15, mitochondrial OS=Mus musculus GN=Mrps15 PE=1 SV=2	6.64413	0.491144	1.40556		22.5295	3.16794	0.0223678	0.0547019	-4.20983	0.385237	0.854101	1	0.0223678	0.0547019
Wnt6	P22727	P22727	Protein Wnt-6 OS=Mus musculus GN=Wnt6 PE=1 SV=2	6.64297	0.49102	1.40544		23.0298	5.99972	0.00141019	0.00874749	-1.09389	0.100086	0.603317	1	0.00141019	0.00874749
Cep55	Q8BT07	Q8BT07	Centrosomal protein of 55 kDa OS=Mus musculus GN=Cep55 PE=1 SV=2	7.61765	0.490418	1.40485		26.8093	8.47463	0.000255727	0.00388465	0.845595	0.0201912	0.27918	0.641541	0.000255727	0.00388465
Zfp654	A0A140LI34	Q9DAU9	Zinc finger protein 654 OS=Mus musculus GN=Zfp654 PE=1 SV=1	6.53057	0.489365	1.40383		24.3471	6.08141	0.00132164	0.0084154	-1.02004	0.0955488	0.592163	1	0.00132164	0.0084154
Parp9	Q8CAS9|Q8CAS9-3	Q8CAS9	Poly [ADP-ribose] polymerase 9 OS=Mus musculus GN=Parp9 PE=1 SV=2|Isoform 3 of Poly [ADP-ribose] polymerase 9 OS=Mus musculus GN=Parp9	6.89743	0.48927	1.40373		25.2757	7.60973	0.000439843	0.0047718	0.231414	0.037004	0.375561	0.641541	0.000439843	0.0047718
Crot	Q9DC50	Q9DC50	Peroxisomal carnitine O-octanoyltransferase OS=Mus musculus GN=Crot PE=1 SV=1	7.82168	0.48849	1.40298		26.2183	7.61092	0.000439501	0.0047718	0.232297	0.0369746	0.375437	0.641541	0.000439501	0.0047718
Trim21	Q3U7K7	Q3U7K7	E3 ubiquitin-protein ligase TRIM21 OS=Mus musculus GN=Trim21 PE=1 SV=1	6.53188	0.485487	1.40006		23.341	5.59964	0.00195723	0.0104469	-1.4671	0.124837	0.654819	1	0.00195723	0.0104469
Dennd5b	A2RSQ0	A2RSQ0	DENN domain-containing protein 5B OS=Mus musculus GN=Dennd5b PE=1 SV=2	6.70515	0.485116	1.3997		22.5846	9.07524	0.00018044	0.00319088	1.23889	0.0128683	0.211272	0.641541	0.00018044	0.00319088
Hexim1	Q8R409	Q8R409	Protein HEXIM1 OS=Mus musculus GN=Hexim1 PE=1 SV=1	7.30149	0.484152	1.39876		24.2038	5.30448	0.00252147	0.0122966	-1.75528	0.145979	0.689277	1	0.00252147	0.0122966
Atad1	Q9D5T0	Q9D5T0	ATPase family AAA domain-containing protein 1 OS=Mus musculus GN=Atad1 PE=1 SV=1	7.54125	0.483342	1.39798		25.2008	6.97795	0.000676507	0.00588075	-0.257743	0.0558047	0.458877	1	0.000676507	0.00588075
Prkcz	Q02956	Q02956	Protein kinase C zeta type OS=Mus musculus GN=Prkcz PE=1 SV=2	6.33973	0.483167	1.39781		22.6843	7.82454	0.000382581	0.00463104	0.389624	0.0319853	0.352622	0.641541	0.000382581	0.00463104
Gaa	P70699	P70699	Lysosomal alpha-glucosidase OS=Mus musculus GN=Gaa PE=1 SV=2	7.93005	0.482351	1.39702		25.7589	8.12313	0.000316854	0.0042292	0.603185	0.0259852	0.319407	0.641541	0.000316854	0.0042292
Ubl5|Gm16381	E0CY38|E0CY91|E0CYW1|E0CZB3|E9QJZ1|Q9EPV8	E0CY38	Ubiquitin-like 5, isoform CRA_a OS=Mus musculus GN=Ubl5 PE=4 SV=1|Ubiquitin-like protein 5 OS=Mus musculus GN=Ubl5 PE=4 SV=1|Ubiquitin-like protein 5 (Fragment) OS=Mus musculus GN=Ubl5 PE=1 SV=1|Ubiquitin-like protein 5 OS=Mus musculus GN=Ubl5 PE=1 SV=1|Protein Gm16381 OS=Mus musculus GN=Gm16381 PE=4 SV=1|Ubiquitin-like protein 5 OS=Mus musculus GN=Ubl5 PE=1 SV=1	7.11855	0.482252	1.39692		24.7314	2.50949	0.0503113	0.0980607	-5.0913	0.491568	0.881935	1	0.0503113	0.0980607
Dtx3l	Q3UIR3|Q3UIR3-2	Q3UIR3	E3 ubiquitin-protein ligase DTX3L OS=Mus musculus GN=Dtx3l PE=1 SV=1|Isoform 2 of E3 ubiquitin-protein ligase DTX3L OS=Mus musculus GN=Dtx3l	6.345	0.482243	1.39691		21.9849	6.09595	0.00130657	0.00836261	-1.00698	0.0947588	0.590157	1	0.00130657	0.00836261
Nfia	B1AUB9|Q02780|Q02780-3|Q02780-4|Q02780-5|Q02780-7	B1AUB9	Nuclear factor 1 OS=Mus musculus GN=Nfia PE=1 SV=1|Nuclear factor 1 A-type OS=Mus musculus GN=Nfia PE=1 SV=1|Isoform 3 of Nuclear factor 1 A-type OS=Mus musculus GN=Nfia|Isoform 4 of Nuclear factor 1 A-type OS=Mus musculus GN=Nfia|Isoform 5 of Nuclear factor 1 A-type OS=Mus musculus GN=Nfia|Isoform 7 of Nuclear factor 1 A-type OS=Mus musculus GN=Nfia	6.9698	0.481725	1.39641		23.6771	6.07849	0.00132469	0.00842298	-1.02266	0.0957078	0.592565	1	0.00132469	0.00842298
Ank3	A0A087WNU5|G5E8K2|G5E8K3|G5E8K5|G5E8K5-3|G5E8K5-5	G5E8K5	Ankyrin-3 (Fragment) OS=Mus musculus GN=Ank3 PE=1 SV=1|Ankyrin 3, epithelial, isoform CRA_l OS=Mus musculus GN=Ank3 PE=1 SV=1|Ankyrin 3, epithelial, isoform CRA_b OS=Mus musculus GN=Ank3 PE=1 SV=1|Ankyrin-3 OS=Mus musculus GN=Ank3 PE=1 SV=1|Isoform 3 of Ankyrin-3 OS=Mus musculus GN=Ank3|Isoform 5 of Ankyrin-3 OS=Mus musculus GN=Ank3	7.08931	0.479531	1.39429		25.1237	5.03919	0.00319439	0.0141935	-2.02413	0.167227	0.717608	1	0.00319439	0.0141935
Prosc	Q544R1|Q9Z2Y8	Q544R1	Proline synthase co-transcribed bacterial homolog protein OS=Mus musculus GN=Prosc PE=1 SV=1|Proline synthase co-transcribed bacterial homolog protein OS=Mus musculus GN=Prosc PE=1 SV=1	7.84215	0.479256	1.39402		25.268	6.56366	0.000913424	0.00685716	-0.599402	0.0720178	0.522532	1	0.000913424	0.00685716
Dennd5a	A0A0R4J1B6|Q6PAL8	Q6PAL8	DENN domain-containing protein 5A OS=Mus musculus GN=Dennd5a PE=1 SV=1|DENN domain-containing protein 5A OS=Mus musculus GN=Dennd5a PE=1 SV=1	6.62906	0.478337	1.39314		24.2753	8.33079	0.000278902	0.00400968	0.747537	0.0224097	0.295716	0.641541	0.000278902	0.00400968
Ddr2	Q62371	Q62371	Discoidin domain-containing receptor 2 OS=Mus musculus GN=Ddr2 PE=1 SV=2	6.39396	0.477545	1.39237		22.3433	4.71876	0.00430172	0.017152	-2.36183	0.195891	0.748539	1	0.00430172	0.017152
Cdca8	Q8BHX3|Q8BHX3-2	Q8BHX3	Borealin OS=Mus musculus GN=Cdca8 PE=1 SV=2|Isoform 2 of Borealin OS=Mus musculus GN=Cdca8	6.65025	0.476618	1.39148		23.1293	6.43183	0.00100825	0.00734243	-0.711852	0.0779218	0.542145	1	0.00100825	0.00734243
Kif24	Q6NWW5|Q6NWW5-2	Q6NWW5	Kinesin-like protein KIF24 OS=Mus musculus GN=Kif24 PE=1 SV=2|Isoform 2 of Kinesin-like protein KIF24 OS=Mus musculus GN=Kif24	6.17591	0.476308	1.39118		23.0319	3.802	0.0109081	0.0326123	-3.41115	0.297377	0.818806	1	0.0109081	0.0326123
Naxe	Q8K4Z3	Q8K4Z3	NAD(P)H-hydrate epimerase OS=Mus musculus GN=Naxe PE=1 SV=1	6.67121	0.475959	1.39084		24.1646	3.49136	0.015386	0.0416933	-3.79527	0.338601	0.837276	1	0.015386	0.0416933
Tango2	P54797|Q8BTN3	P54797	Transport and Golgi organization 2 homolog OS=Mus musculus GN=Tango2 PE=1 SV=1|DNA segment, Chr 16, human D22S680E, expressed, isoform CRA_c OS=Mus musculus GN=Tango2 PE=1 SV=1	6.303	0.474871	1.38979		23.0698	4.15775	0.00749212	0.0250945	-2.989	0.254462	0.794526	1	0.00749212	0.0250945
Lzts2	Q91YU6	Q91YU6	Leucine zipper putative tumor suppressor 2 OS=Mus musculus GN=Lzts2 PE=1 SV=3	6.39264	0.473552	1.38852		22.601	8.39547	0.000268189	0.00395018	0.791823	0.0213871	0.288286	0.641541	0.000268189	0.00395018
Cox15	Q8BJ03|Q8BJ03-2	Q8BJ03	Cytochrome c oxidase assembly protein COX15 homolog OS=Mus musculus GN=Cox15 PE=1 SV=1|Isoform 2 of Cytochrome c oxidase assembly protein COX15 homolog OS=Mus musculus GN=Cox15	6.92609	0.473475	1.38845		22.9381	5.39971	0.002321	0.011621	-1.66107	0.138877	0.678496	1	0.002321	0.011621
Man2b1	O09159	O09159	Lysosomal alpha-mannosidase OS=Mus musculus GN=Man2b1 PE=1 SV=4	7.4087	0.472621	1.38763		25.6596	8.46187	0.000257689	0.00389411	0.836961	0.0203799	0.280648	0.641541	0.000257689	0.00389411
Q91V76	Q91V76	Q91V76	Ester hydrolase C11orf54 homolog OS=Mus musculus PE=1 SV=1	7.36395	0.472291	1.38731		25.496	6.05242	0.00135231	0.00853284	-1.04616	0.0971397	0.596145	1	0.00135231	0.00853284
Plk1	Q07832|Q3TPZ2	Q07832	Serine/threonine-protein kinase PLK1 OS=Mus musculus GN=Plk1 PE=1 SV=2|Serine/threonine-protein kinase PLK OS=Mus musculus GN=Plk1 PE=1 SV=1	7.5338	0.471927	1.38696		26.3833	3.56343	0.014187	0.0391812	-3.7049	0.328725	0.833203	1	0.014187	0.0391812
Arpc1a	Q9R0Q6	Q9R0Q6	Actin-related protein 2/3 complex subunit 1A OS=Mus musculus GN=Arpc1a PE=1 SV=1	7.00131	0.470973	1.38604		24.5974	8.53276	0.000247009	0.00381934	0.884781	0.0193506	0.272495	0.641541	0.000247009	0.00381934
Ctnnal1	O88327	O88327	Alpha-catulin OS=Mus musculus GN=Ctnnal1 PE=1 SV=1	6.23506	0.470483	1.38557		22.6226	6.18479	0.00121868	0.00802975	-0.927681	0.0900443	0.577759	1	0.00121868	0.00802975
Tbc1d23	Q8K0F1	Q8K0F1	TBC1 domain family member 23 OS=Mus musculus GN=Tbc1d23 PE=1 SV=1	7.32654	0.469286	1.38442		24.9373	8.17438	0.000306952	0.00418232	0.639121	0.0250598	0.313592	0.641541	0.000306952	0.00418232
Ppp1r2	Q9DCL8	Q9DCL8	Protein phosphatase inhibitor 2 OS=Mus musculus GN=Ppp1r2 PE=1 SV=3	7.07485	0.469016	1.38417		24.7356	3.77358	0.0112498	0.0333256	-3.4457	0.301003	0.820597	1	0.0112498	0.0333256
Napepld	Q8BH82	Q8BH82	N-acyl-phosphatidylethanolamine-hydrolyzing phospholipase D OS=Mus musculus GN=Napepld PE=1 SV=1	6.589	0.468865	1.38402		24.0214	7.92906	0.000357902	0.00446619	0.465205	0.0297621	0.341146	0.641541	0.000357902	0.00446619
Ankib1	Q6ZPS6	Q6ZPS6	Ankyrin repeat and IBR domain-containing protein 1 OS=Mus musculus GN=Ankib1 PE=1 SV=2	6.91379	0.466804	1.38204		24.7301	5.84053	0.00160334	0.00940112	-1.24006	0.10942	0.624447	1	0.00160334	0.00940112
Aifm2	Q8BUE4	Q8BUE4	Apoptosis-inducing factor 2 OS=Mus musculus GN=Aifm2 PE=1 SV=1	7.34769	0.466786	1.38203		25.3585	5.70334	0.0017948	0.00998898	-1.36848	0.118004	0.641987	1	0.0017948	0.00998898
Pdlim1	O70400	O70400	PDZ and LIM domain protein 1 OS=Mus musculus GN=Pdlim1 PE=1 SV=4	8.337	0.465996	1.38127		26.9682	8.44757	0.00025991	0.00390738	0.827263	0.0205933	0.282294	0.641541	0.00025991	0.00390738
Hsbp1	Q9CQZ1	Q9CQZ1	Heat shock factor-binding protein 1 OS=Mus musculus GN=Hsbp1 PE=1 SV=1	6.86533	0.464744	1.38007		23.1525	3.20175	0.0214933	0.0531666	-4.16583	0.380185	0.852449	1	0.0214933	0.0531666
Mdp1	Q9D967	Q9D967	Magnesium-dependent phosphatase 1 OS=Mus musculus GN=Mdp1 PE=1 SV=1	6.17026	0.463955	1.37932		21.5682	5.91226	0.00151274	0.00908789	-1.17382	0.105132	0.615027	1	0.00151274	0.00908789
Gpd1l	Q3ULJ0|Q3ULJ0-2	Q3ULJ0	Glycerol-3-phosphate dehydrogenase 1-like protein OS=Mus musculus GN=Gpd1l PE=1 SV=2|Isoform 2 of Glycerol-3-phosphate dehydrogenase 1-like protein OS=Mus musculus GN=Gpd1l	7.42046	0.463628	1.37901		24.7955	7.73023	0.000406574	0.00467415	0.320647	0.0341119	0.362808	0.641541	0.000406574	0.00467415
Dnaja1	P63037|Q5NTY0	P63037	DnaJ homolog subfamily A member 1 OS=Mus musculus GN=Dnaja1 PE=1 SV=1|DnaJ (Hsp40) homolog, subfamily A, member 1 OS=Mus musculus GN=Dnaja1 PE=1 SV=1	7.09109	0.463377	1.37877		24.751	5.14369	0.00290715	0.013445	-1.91709	0.158595	0.706746	1	0.00290715	0.013445
Tex14	Q7M6U3	Q7M6U3	Inactive serine/threonine-protein kinase TEX14 OS=Mus musculus GN=Tex14 PE=1 SV=2	7.02271	0.462207	1.37765		25.8124	4.8789	0.003701	0.0155683	-2.19125	0.181145	0.733524	1	0.003701	0.0155683
Mastl	Q8C0P0	Q8C0P0	Serine/threonine-protein kinase greatwall OS=Mus musculus GN=Mastl PE=2 SV=2	7.21369	0.461908	1.37736		25.4496	6.84345	0.00074455	0.0062015	-0.366761	0.0606975	0.479806	1	0.00074455	0.0062015
Ccdc85c	E9Q6B2	E9Q6B2	Coiled-coil domain-containing protein 85C OS=Mus musculus GN=Ccdc85c PE=1 SV=1	5.95375	0.46136	1.37684		21.3846	4.55788	0.00502087	0.0189931	-2.53693	0.211573	0.762756	1	0.00502087	0.0189931
Cenpf	E9Q3P4	E9Q3P4	Protein Cenpf OS=Mus musculus GN=Cenpf PE=1 SV=1	7.42951	0.461273	1.37676		27.8867	4.39981	0.00586487	0.0212332	-2.71266	0.227846	0.775903	1	0.00586487	0.0212332
Slc25a30	Q9CR58	Q9CR58	Kidney mitochondrial carrier protein 1 OS=Mus musculus GN=Slc25a30 PE=1 SV=1	6.56701	0.461093	1.37658		23.1783	6.84876	0.000741716	0.00620062	-0.362422	0.0604978	0.478983	1	0.000741716	0.00620062
Zyg11b	Q3UFS0	Q3UFS0	Protein zyg-11 homolog B OS=Mus musculus GN=Zyg11b PE=1 SV=2	6.51938	0.460019	1.37556		23.0096	6.85131	0.000740362	0.00620062	-0.360344	0.0604022	0.478589	1	0.000740362	0.00620062
Man2a1	P27046	P27046	Alpha-mannosidase 2 OS=Mus musculus GN=Man2a1 PE=1 SV=2	7.84858	0.458806	1.3744		26.8035	6.1827	0.00122067	0.00803378	-0.929541	0.0901533	0.578054	1	0.00122067	0.00803378
Phlda1	Q62392	Q62392	Pleckstrin homology-like domain family A member 1 OS=Mus musculus GN=Phlda1 PE=1 SV=2	6.66252	0.458291	1.37391		23.5096	2.64135	0.042564	0.0867845	-4.91177	0.469092	0.876973	1	0.042564	0.0867845
Crkl	A2RS58|P47941	A2RS58	Crk-like protein OS=Mus musculus GN=Crkl PE=1 SV=1|Crk-like protein OS=Mus musculus GN=Crkl PE=1 SV=2	7.05554	0.458291	1.37391		25.1237	6.45946	0.000987464	0.00724472	-0.68813	0.0766528	0.538067	1	0.000987464	0.00724472
Plpp3	Q99JY8	Q99JY8	Phospholipid phosphatase 3 OS=Mus musculus GN=Plpp3 PE=1 SV=1	6.54869	0.458084	1.37372		23.0058	6.05893	0.00134534	0.00851709	-1.04028	0.0967803	0.595252	1	0.00134534	0.00851709
Nexn	A0A0G2JEX1|A0A0G2JG59|Q7TPW1	Q7TPW1	Nexilin OS=Mus musculus GN=Nexn PE=1 SV=1|Nexilin (Fragment) OS=Mus musculus GN=Nexn PE=1 SV=1|Nexilin OS=Mus musculus GN=Nexn PE=1 SV=3	7.57884	0.456716	1.37241		26.3016	8.57936	0.00024027	0.00376789	0.916023	0.0186988	0.267138	0.641541	0.00024027	0.00376789
Ubxn7	G5E8R8	G5E8R8	UBX domain-containing protein 7 OS=Mus musculus GN=Ubxn7 PE=1 SV=1	7.76473	0.456666	1.37237		25.0344	5.99181	0.00141912	0.00874749	-1.10108	0.100534	0.604386	1	0.00141912	0.00874749
Map4	A0A140T8T5|P27546|P27546-4	P27546	Microtubule-associated protein OS=Mus musculus GN=Map4 PE=1 SV=1|Microtubule-associated protein 4 OS=Mus musculus GN=Map4 PE=1 SV=3|Isoform 4 of Microtubule-associated protein 4 OS=Mus musculus GN=Map4	8.21077	0.456247	1.37197		28.6112	7.2419	0.000562981	0.005352	-0.0488988	0.0471554	0.419837	0.811024	0.000562981	0.005352
Aplp2	Q60709	Q60709	Amyloid-like protein 2 OS=Mus musculus GN=Aplp2 PE=1 SV=1	6.59594	0.455826	1.37157		23.3671	6.6478	0.000858335	0.00661934	-0.528595	0.0684449	0.509825	1	0.000858335	0.00661934
Dbn1	Q9QXS6|Q9QXS6-3	Q9QXS6	Drebrin OS=Mus musculus GN=Dbn1 PE=1 SV=4|Isoform E2 of Drebrin OS=Mus musculus GN=Dbn1	7.74727	0.455185	1.37096		26.1843	7.67594	0.000421187	0.00468555	0.280593	0.0353903	0.368593	0.641541	0.000421187	0.00468555
Aamdc	D3YZD8|D3Z442|Q8R0P4	D3YZD8	Mth938 domain-containing protein OS=Mus musculus GN=Aamdc PE=1 SV=1|Mth938 domain-containing protein OS=Mus musculus GN=Aamdc PE=1 SV=1|Mth938 domain-containing protein OS=Mus musculus GN=Aamdc PE=1 SV=1	6.83565	0.455182	1.37096		24.0634	8.10014	0.000321416	0.00424036	0.586999	0.0264097	0.322006	0.641541	0.000321416	0.00424036
Gtf2e2	Q9D902	Q9D902	General transcription factor IIE subunit 2 OS=Mus musculus GN=Gtf2e2 PE=1 SV=2	7.3577	0.454361	1.37018		25.7345	5.72709	0.00175984	0.00992846	-1.34609	0.116482	0.638997	1	0.00175984	0.00992846
March5	A2RTC8|Q3KNM2	A2RTC8	E3 ubiquitin-protein ligase MARCH5 OS=Mus musculus GN=March5 PE=1 SV=1|E3 ubiquitin-protein ligase MARCH5 OS=Mus musculus GN=March5 PE=1 SV=1	6.62379	0.454059	1.36989		23.235	8.46768	0.000256794	0.0038907	0.840891	0.0202938	0.27998	0.641541	0.000256794	0.0038907
Ociad1	A0A0J9YUB6|Q9CRD0	Q9CRD0	OCIA domain-containing protein 1 (Fragment) OS=Mus musculus GN=Ociad1 PE=1 SV=1|OCIA domain-containing protein 1 OS=Mus musculus GN=Ociad1 PE=1 SV=1	6.84264	0.453712	1.36956		23.9564	4.8718	0.00372548	0.0156271	-2.19873	0.181781	0.734208	1	0.00372548	0.0156271
Nsrp1	Q5NCR9	Q5NCR9	Nuclear speckle splicing regulatory protein 1 OS=Mus musculus GN=Nsrp1 PE=1 SV=1	7.24325	0.453523	1.36938		25.0353	3.9619	0.00919164	0.0288441	-3.21904	0.277523	0.808328	1	0.00919164	0.0288441
Msra	Q9D6Y7|Q9D6Y7-2|Q9D6Y7-3	Q9D6Y7	Mitochondrial peptide methionine sulfoxide reductase OS=Mus musculus GN=Msra PE=1 SV=1|Isoform 2 of Mitochondrial peptide methionine sulfoxide reductase OS=Mus musculus GN=Msra|Isoform 3 of Mitochondrial peptide methionine sulfoxide reductase OS=Mus musculus GN=Msra	6.54602	0.453458	1.36932		22.7929	7.18489	0.000585488	0.00546969	-0.0934512	0.0489215	0.427278	0.811024	0.000585488	0.00546969
Eml2	D3YWS2|E9QK48|Q7TNG5|Q7TNG5-2	Q7TNG5	Echinoderm microtubule-associated protein-like 2 OS=Mus musculus GN=Eml2 PE=1 SV=2|Echinoderm microtubule-associated protein-like 2 OS=Mus musculus GN=Eml2 PE=1 SV=1|Echinoderm microtubule-associated protein-like 2 OS=Mus musculus GN=Eml2 PE=1 SV=1|Isoform 2 of Echinoderm microtubule-associated protein-like 2 OS=Mus musculus GN=Eml2	8.08227	0.453009	1.36889		26.2032	7.92646	0.000358492	0.00446619	0.463339	0.0298157	0.341433	0.641541	0.000358492	0.00446619
2210016F16Rik	G3X8U3	G3X8U3	MCG6895 OS=Mus musculus GN=2210016F16Rik PE=1 SV=1	7.60833	0.452174	1.3681		26.4324	3.98613	0.00895925	0.0283516	-3.19027	0.274595	0.806679	1	0.00895925	0.0283516
Smad2	Q62432|Q62432-2	Q62432	Mothers against decapentaplegic homolog 2 OS=Mus musculus GN=Smad2 PE=1 SV=2|Isoform Short of Mothers against decapentaplegic homolog 2 OS=Mus musculus GN=Smad2	7.49252	0.451494	1.36746		25.3295	8.31908	0.000280895	0.00400968	0.739485	0.0225993	0.29706	0.641541	0.000280895	0.00400968
Ppp2r1b	G3UWS4|H3BKU1|Q3TTF6|Q7TNP2	G3UWS4	Serine/threonine-protein phosphatase 2A 65 kDa regulatory subunit A beta isoform OS=Mus musculus GN=Ppp2r1b PE=1 SV=1|Protein phosphatase 2 (Formerly 2A), regulatory subunit A (PR 65), beta isoform, isoform CRA_b OS=Mus musculus GN=Ppp2r1b PE=1 SV=1|Serine/threonine-protein phosphatase 2A 65 kDa regulatory subunit A beta isoform OS=Mus musculus GN=Ppp2r1b PE=1 SV=1|Serine/threonine-protein phosph…	7.19708	0.449352	1.36543		25.3324	4.79571	0.00400009	0.0163956	-2.27941	0.1887	0.741434	1	0.00400009	0.0163956
Zhx3	Q3UPQ8|Q8C0Q2	Q3UPQ8	Zinc fingers and homeoboxes 3 OS=Mus musculus GN=Zhx3 PE=1 SV=1|Zinc fingers and homeoboxes protein 3 OS=Mus musculus GN=Zhx3 PE=1 SV=2	6.34003	0.448953	1.36505		21.4186	4.74928	0.00417907	0.0167681	-2.32904	0.193015	0.745745	1	0.00417907	0.0167681
Gss	P51855|Q541E2	P51855	Glutathione synthetase OS=Mus musculus GN=Gss PE=1 SV=1|Glutathione synthetase (Fragment) OS=Mus musculus GN=Gss PE=1 SV=1	7.45964	0.448653	1.36477		26.7985	7.09845	0.00062165	0.00561696	-0.161581	0.0517049	0.439998	1	0.00062165	0.00561696
Gclm	O09172|Q4FJZ6	O09172	Glutamate--cysteine ligase regulatory subunit OS=Mus musculus GN=Gclm PE=1 SV=1|Gclm protein OS=Mus musculus GN=Gclm PE=1 SV=1	8.80082	0.447786	1.36395		27.0262	5.76819	0.00170118	0.00972438	-1.30749	0.113883	0.633776	1	0.00170118	0.00972438
Abcc4	E9Q236	E9Q236	Protein Abcc4 OS=Mus musculus GN=Abcc4 PE=1 SV=1	7.43015	0.447498	1.36367		26.4993	8.40004	0.000267451	0.00394931	0.794938	0.0213165	0.287761	0.641541	0.000267451	0.00394931
Patl1	Q3TC46	Q3TC46	Protein PAT1 homolog 1 OS=Mus musculus GN=Patl1 PE=1 SV=2	6.67926	0.447311	1.3635		22.3133	6.27454	0.0011368	0.00773558	-0.848486	0.0854755	0.565007	1	0.0011368	0.00773558
Zmynd11	D3YY85|Q8BJZ0|Q8R5C8	D3YY85	Zinc finger MYND domain-containing protein 11 OS=Mus musculus GN=Zmynd11 PE=1 SV=1|Zinc finger MYND domain-containing protein 11 OS=Mus musculus GN=Zmynd11 PE=1 SV=1|Zinc finger MYND domain-containing protein 11 OS=Mus musculus GN=Zmynd11 PE=1 SV=2	6.87264	0.447149	1.36334		24.8764	8.21395	0.000299555	0.0041465	0.66673	0.0243649	0.309086	0.641541	0.000299555	0.0041465
Fnbp1	A2AQ41|A2AQ42|A2AQ43|A2AQ44|A2AQ45|Q80TY0|Q80TY0-2	A2AQ41	Formin-binding protein 1 OS=Mus musculus GN=Fnbp1 PE=1 SV=1|Formin-binding protein 1 OS=Mus musculus GN=Fnbp1 PE=1 SV=1|Formin-binding protein 1 OS=Mus musculus GN=Fnbp1 PE=1 SV=1|Formin-binding protein 1 OS=Mus musculus GN=Fnbp1 PE=1 SV=1|Formin-binding protein 1 OS=Mus musculus GN=Fnbp1 PE=1 SV=1|Formin-binding protein 1 OS=Mus musculus GN=Fnbp1 PE=1 SV=2|Isoform 2 of Formin-binding protein 1 O…	7.42616	0.446403	1.36264		26.0185	6.30175	0.00111326	0.00764949	-0.824654	0.084128	0.561097	1	0.00111326	0.00764949
Hsdl2	Q2TPA8	Q2TPA8	Hydroxysteroid dehydrogenase-like protein 2 OS=Mus musculus GN=Hsdl2 PE=1 SV=1	7.69446	0.446303	1.36254		26.0898	6.92658	0.000701603	0.00600621	-0.299173	0.0576333	0.466893	1	0.000701603	0.00600621
Nt5c	A2A9X5|Q9JM14	A2A9X5	5'(3')-deoxyribonucleotidase, cytosolic type OS=Mus musculus GN=Nt5c PE=1 SV=1|5'(3')-deoxyribonucleotidase, cytosolic type OS=Mus musculus GN=Nt5c PE=1 SV=1	7.19786	0.445946	1.36221		24.0983	7.77236	0.000395645	0.00464979	0.351551	0.0331475	0.358279	0.641541	0.000395645	0.00464979
Phf12	Q5SPL2	Q5SPL2	PHD finger protein 12 OS=Mus musculus GN=Phf12 PE=1 SV=1	6.43991	0.445248	1.36155		22.2901	2.755	0.0369196	0.0777972	-4.75798	0.450185	0.872465	1	0.0369196	0.0777972
Slc6a9	P28571-1	P28571	Isoform GlyT-1A of Sodium- and chloride-dependent glycine transporter 1 OS=Mus musculus GN=Slc6a9	6.48454	0.444991	1.36131		23.2449	7.4922	0.000475403	0.00494794	0.143164	0.0400235	0.388565	0.747374	0.000475403	0.00494794
Homer3	Q99JP6-2	Q99JP6	Isoform 2 of Homer protein homolog 3 OS=Mus musculus GN=Homer3	6.59686	0.444604	1.36094		24.266	7.00534	0.000663558	0.00583169	-0.235763	0.0548498	0.454595	1	0.000663558	0.00583169
Ten1	Q9D7K2	Q9D7K2	CST complex subunit TEN1 OS=Mus musculus GN=Ten1 PE=1 SV=1	5.91076	0.444149	1.36051		22.8231	7.55386	0.000456345	0.00484199	0.189612	0.0384143	0.381366	0.641541	0.000456345	0.00484199
Avl9	Q80U56	Q80U56	Late secretory pathway protein AVL9 homolog OS=Mus musculus GN=Avl9 PE=1 SV=2	6.72937	0.444055	1.36042		24.3618	8.19267	0.000303506	0.00415935	0.651899	0.0247364	0.311511	0.641541	0.000303506	0.00415935
Trim26	B8JJ56|J3QN94|Q99PN3|Q99PN3-2	B8JJ56	Tripartite motif-containing protein 26 (Fragment) OS=Mus musculus GN=Trim26 PE=1 SV=1|Tripartite motif-containing protein 26 OS=Mus musculus GN=Trim26 PE=1 SV=1|Tripartite motif-containing protein 26 OS=Mus musculus GN=Trim26 PE=2 SV=3|Isoform Beta of Tripartite motif-containing protein 26 OS=Mus musculus GN=Trim26	7.1495	0.4427	1.35915		25.7861	5.44686	0.00222862	0.0113439	-1.61486	0.135461	0.673039	1	0.00222862	0.0113439
Igf2bp1	O88477	O88477	Insulin-like growth factor 2 mRNA-binding protein 1 OS=Mus musculus GN=Igf2bp1 PE=1 SV=1	7.57196	0.442456	1.35892		26.4926	7.29523	0.000542839	0.00528626	-0.00749867	0.0455523	0.412943	0.783346	0.000542839	0.00528626
Herc6	F2Z461	F2Z461	E3 ISG15--protein ligase Herc6 OS=Mus musculus GN=Herc6 PE=2 SV=1	6.30211	0.44192	1.35841		22.6905	3.51541	0.0149737	0.0408616	-3.76503	0.335285	0.835931	1	0.0149737	0.0408616
Tbc1d4	Q8BYJ6	Q8BYJ6	TBC1 domain family member 4 OS=Mus musculus GN=Tbc1d4 PE=1 SV=2	6.73955	0.441811	1.35831		24.3814	7.4103	0.000502179	0.00509892	0.0809422	0.0422491	0.398647	0.747374	0.000502179	0.00509892
Armc10	Q9D0L7|Q9D0L7-2	Q9D0L7	Armadillo repeat-containing protein 10 OS=Mus musculus GN=Armc10 PE=1 SV=1|Isoform 2 of Armadillo repeat-containing protein 10 OS=Mus musculus GN=Armc10	7.40472	0.440716	1.35728		24.6899	6.4032	0.00103034	0.00744662	-0.736526	0.079255	0.546354	1	0.00103034	0.00744662
Mettl7a1	Q8C6B0	Q8C6B0	MCG20149, isoform CRA_a OS=Mus musculus GN=Mettl7a1 PE=1 SV=1	6.94048	0.440306	1.35689		24.6748	6.11989	0.00128217	0.00827806	-0.985518	0.0934691	0.586838	1	0.00128217	0.00827806
Klf13	Q9JJZ6	Q9JJZ6	Krueppel-like factor 13 OS=Mus musculus GN=Klf13 PE=1 SV=2	6.43961	0.439866	1.35648		22.7513	7.79039	0.000391072	0.00463391	0.364735	0.0327418	0.35633	0.641541	0.000391072	0.00463391
Pten	O08586	O08586	Phosphatidylinositol 3,4,5-trisphosphate 3-phosphatase and dual-specificity protein phosphatase PTEN OS=Mus musculus GN=Pten PE=1 SV=1	7.31116	0.439676	1.3563		24.0464	8.10978	0.000319493	0.00423419	0.593794	0.0262309	0.320917	0.641541	0.000319493	0.00423419
Ano10	Q8BH79|Q8BH79-2	Q8BH79	Anoctamin-10 OS=Mus musculus GN=Ano10 PE=1 SV=1|Isoform 2 of Anoctamin-10 OS=Mus musculus GN=Ano10	6.82824	0.439529	1.35616		24.5453	8.11535	0.00031839	0.0042292	0.597711	0.0261282	0.320288	0.641541	0.00031839	0.0042292
Thoc7	Q7TMY4	Q7TMY4	THO complex subunit 7 homolog OS=Mus musculus GN=Thoc7 PE=1 SV=2	7.24237	0.439262	1.35591		25.4669	1.66602	0.152239	0.230843	-6.23201	0.647935	0.9078	1	0.152239	0.230843
Lancl2	F6RJV6|Q9JJK2	F6RJV6	LanC-like protein 2 (Fragment) OS=Mus musculus GN=Lancl2 PE=1 SV=1|LanC-like protein 2 OS=Mus musculus GN=Lancl2 PE=1 SV=1	6.81388	0.439206	1.35586		24.8175	7.78743	0.000391818	0.00463391	0.362574	0.0328081	0.35665	0.641541	0.000391818	0.00463391
Ggcx	B2RS80|Q9QYC7	B2RS80	Gamma-glutamyl carboxylase OS=Mus musculus GN=Ggcx PE=1 SV=1|Vitamin K-dependent gamma-carboxylase OS=Mus musculus GN=Ggcx PE=1 SV=1	6.59024	0.439154	1.35581		23.3815	8.14183	0.000313198	0.0042292	0.616321	0.0256441	0.317288	0.641541	0.000313198	0.0042292
Rmnd1	Q8CI78	Q8CI78	Required for meiotic nuclear division protein 1 homolog OS=Mus musculus GN=Rmnd1 PE=1 SV=1	6.79854	0.438392	1.35509		23.0044	7.37263	0.000515084	0.00514186	0.0521227	0.0433074	0.403245	0.747374	0.000515084	0.00514186
Ppp2r5e	Q61151	Q61151	Serine/threonine-protein phosphatase 2A 56 kDa regulatory subunit epsilon isoform OS=Mus musculus GN=Ppp2r5e PE=1 SV=3	6.29851	0.438115	1.35483		23.2066	7.97108	0.000348509	0.00436964	0.495342	0.0289064	0.336482	0.641541	0.000348509	0.00436964
Frmd8	Q3UFK8	Q3UFK8	FERM domain-containing protein 8 OS=Mus musculus GN=Frmd8 PE=1 SV=2	7.09727	0.4381	1.35482		23.2202	7.50628	0.000470972	0.0049106	0.153796	0.0396512	0.386821	0.747374	0.000470972	0.0049106
Arhgef40	Q3UPH7|Q3UPH7-2|Q3UPH7-3|Q3UPH7-6|S4R189	Q3UPH7	Rho guanine nucleotide exchange factor 40 OS=Mus musculus GN=Arhgef40 PE=1 SV=1|Isoform 2 of Rho guanine nucleotide exchange factor 40 OS=Mus musculus GN=Arhgef40|Isoform 3 of Rho guanine nucleotide exchange factor 40 OS=Mus musculus GN=Arhgef40|Isoform 6 of Rho guanine nucleotide exchange factor 40 OS=Mus musculus GN=Arhgef40|Rho guanine nucleotide exchange factor 40 OS=Mus musculus GN=Arhgef40 …	7.14087	0.438049	1.35477		25.617	6.02462	0.00138249	0.00860247	-1.0713	0.098685	0.599939	1	0.00138249	0.00860247
Wdr6	Q99ME2	Q99ME2	WD repeat-containing protein 6 OS=Mus musculus GN=Wdr6 PE=1 SV=1	7.29543	0.437794	1.35453		24.05	4.90023	0.00362851	0.0153358	-2.16881	0.179245	0.731458	1	0.00362851	0.0153358
Agk	Q9ESW4	Q9ESW4	Acylglycerol kinase, mitochondrial OS=Mus musculus GN=Agk PE=1 SV=1	7.5259	0.436322	1.35315		26.2972	5.72154	0.00176794	0.00992846	-1.35132	0.116836	0.639698	1	0.00176794	0.00992846
Polr3f	Q921X6	Q921X6	DNA-directed RNA polymerase III subunit RPC6 OS=Mus musculus GN=Polr3f PE=1 SV=1	6.89169	0.43582	1.35268		24.6303	2.66986	0.0410653	0.0843259	-4.87311	0.464309	0.875863	1	0.0410653	0.0843259
Arl1	F8WIB1|P61211|Q14AC7	F8WIB1	ADP-ribosylation factor-like protein 1 (Fragment) OS=Mus musculus GN=Arl1 PE=1 SV=1|ADP-ribosylation factor-like protein 1 OS=Mus musculus GN=Arl1 PE=1 SV=1|ADP-ribosylation factor-like 1 OS=Mus musculus GN=Arl1 PE=1 SV=1	6.65971	0.435723	1.35259		21.7143	7.79383	0.000390206	0.00463391	0.367248	0.0326649	0.355957	0.641541	0.000390206	0.00463391
Rab6b	P61294|Q0PD53	P61294	Ras-related protein Rab-6B OS=Mus musculus GN=Rab6b PE=1 SV=1|RAB6B, member RAS oncogene family OS=Mus musculus GN=Rab6b PE=1 SV=1	7.06898	0.434744	1.35167		22.9563	5.73317	0.00175101	0.00991955	-1.34036	0.116094	0.638228	1	0.00175101	0.00991955
Ttk	P35761|P35761-2	P35761	Dual specificity protein kinase TTK OS=Mus musculus GN=Ttk PE=1 SV=1|Isoform 2 of Dual specificity protein kinase TTK OS=Mus musculus GN=Ttk	7.17055	0.434416	1.35136		26.2825	5.05577	0.0031467	0.0140935	-2.00705	0.165834	0.71591	1	0.0031467	0.0140935
Smad5	P97454	P97454	Mothers against decapentaplegic homolog 5 OS=Mus musculus GN=Smad5 PE=1 SV=2	7.18116	0.434282	1.35124		23.5038	7.32252	0.000532859	0.00521915	0.0135833	0.0447499	0.409471	0.783346	0.000532859	0.00521915
Hexa	P29416	P29416	Beta-hexosaminidase subunit alpha OS=Mus musculus GN=Hexa PE=1 SV=2	7.51312	0.433507	1.35051		25.0446	7.42867	0.000496024	0.00507858	0.094949	0.0417411	0.396396	0.747374	0.000496024	0.00507858
Kif13a	Q9EQW7	Q9EQW7	Kinesin-like protein KIF13A OS=Mus musculus GN=Kif13a PE=1 SV=1	6.98433	0.432923	1.34997		25.3965	5.25938	0.00262334	0.0126451	-1.80032	0.149438	0.69427	1	0.00262334	0.0126451
Lrrc59	Q922Q8	Q922Q8	Leucine-rich repeat-containing protein 59 OS=Mus musculus GN=Lrrc59 PE=1 SV=1	8.23481	0.432576	1.34964		26.2996	3.70737	0.0120938	0.0351108	-3.52665	0.309564	0.824689	1	0.0120938	0.0351108
Ikbkb	A0A0R4J0T4|O88351|Q5D0E0	O88351	Inhibitor of nuclear factor kappa-B kinase subunit beta OS=Mus musculus GN=Ikbkb PE=1 SV=1|Inhibitor of nuclear factor kappa-B kinase subunit beta OS=Mus musculus GN=Ikbkb PE=1 SV=1|Ikbkb protein OS=Mus musculus GN=Ikbkb PE=1 SV=1	7.06027	0.432514	1.34958		25.5042	6.7791	0.000779914	0.00626732	-0.419559	0.0631612	0.489743	1	0.000779914	0.00626732
Slc25a1	Q8JZU2	Q8JZU2	Tricarboxylate transport protein, mitochondrial OS=Mus musculus GN=Slc25a1 PE=1 SV=1	7.76145	0.432375	1.34945		25.6373	6.1477	0.00125451	0.00817327	-0.960679	0.0919892	0.582963	1	0.00125451	0.00817327
Synm	Q70IV5	Q70IV5	Synemin OS=Mus musculus GN=Synm PE=1 SV=2	6.37914	0.432247	1.34933		24.0035	4.67996	0.00446371	0.0175235	-2.40372	0.199593	0.752047	1	0.00446371	0.0175235
Snap47	Q8R570	Q8R570	Synaptosomal-associated protein 47 OS=Mus musculus GN=Snap47 PE=1 SV=1	7.47334	0.431921	1.34903		25.2161	7.74406	0.000402947	0.00466945	0.330811	0.0337926	0.361325	0.641541	0.000402947	0.00466945
Cdc20	Q9JJ66	Q9JJ66	Cell division cycle protein 20 homolog OS=Mus musculus GN=Cdc20 PE=1 SV=2	6.80353	0.431639	1.34876		24.72	3.51483	0.0149835	0.0408691	-3.76576	0.335364	0.835963	1	0.0149835	0.0408691
Znfx1	Q8R151	Q8R151	NFX1-type zinc finger-containing protein 1 OS=Mus musculus GN=Znfx1 PE=1 SV=3	7.05873	0.43088	1.34806		26.1227	6.83674	0.000748149	0.00620168	-0.372248	0.0609506	0.480845	1	0.000748149	0.00620168
Gpalpp1	Q69ZC8	Q69ZC8	GPALPP motifs-containing protein 1 OS=Mus musculus GN=Gpalpp1 PE=1 SV=2	6.17388	0.430381	1.34759		23.1246	4.63449	0.0046625	0.0180602	-2.45309	0.203996	0.756093	1	0.0046625	0.0180602
Zyx	Q62523|Q7TQE2	Q62523	Zyxin OS=Mus musculus GN=Zyx PE=1 SV=2|Zyx protein OS=Mus musculus GN=Zyx PE=1 SV=1	7.64191	0.42899	1.34629		26.4252	5.72511	0.00176272	0.00992846	-1.34795	0.116608	0.639246	1	0.00176272	0.00992846
Ccar2	Q8VDP4	Q8VDP4	Cell cycle and apoptosis regulator protein 2 OS=Mus musculus GN=Ccar2 PE=1 SV=2	7.55667	0.428706	1.34603		27.0635	7.56596	0.000452711	0.00483279	0.198688	0.0381051	0.380115	0.641541	0.000452711	0.00483279
Hps3	Q91VB4	Q91VB4	Hermansky-Pudlak syndrome 3 protein homolog OS=Mus musculus GN=Hps3 PE=2 SV=2	6.39617	0.427786	1.34517		22.6062	3.47486	0.0156763	0.0422832	-3.81607	0.340889	0.838192	1	0.0156763	0.0422832
Ttn	A2ASS6	A2ASS6	Titin OS=Mus musculus GN=Ttn PE=1 SV=1	6.66426	0.427206	1.34463		25.3824	7.62882	0.000434367	0.00475514	0.24563	0.0365325	0.373562	0.641541	0.000434367	0.00475514
Senp7	E9Q1L5|Q8BUH8	E9Q1L5	Sentrin-specific protease 7 OS=Mus musculus GN=Senp7 PE=1 SV=1|Sentrin-specific protease 7 OS=Mus musculus GN=Senp7 PE=1 SV=1	7.06537	0.426602	1.34406		25.3097	7.36345	0.000518289	0.00514186	0.0450771	0.0435688	0.404362	0.747374	0.000518289	0.00514186
Stat5b	P42232	P42232	Signal transducer and activator of transcription 5B OS=Mus musculus GN=Stat5b PE=1 SV=1	6.60515	0.426524	1.34399		23.7668	1.80842	0.125996	0.199035	-6.04479	0.620133	0.904063	1	0.125996	0.199035
Ttc3	G5E8T2|O88196|O88196-2|O88196-3|O88196-4|O88196-5|O88196-6	G5E8T2	E3 ubiquitin-protein ligase TTC3 OS=Mus musculus GN=Ttc3 PE=1 SV=1|E3 ubiquitin-protein ligase TTC3 OS=Mus musculus GN=Ttc3 PE=1 SV=2|Isoform 2 of E3 ubiquitin-protein ligase TTC3 OS=Mus musculus GN=Ttc3|Isoform 3 of E3 ubiquitin-protein ligase TTC3 OS=Mus musculus GN=Ttc3|Isoform 4 of E3 ubiquitin-protein ligase TTC3 OS=Mus musculus GN=Ttc3|Isoform 5 of E3 ubiquitin-protein ligase TTC3 OS=Mus mu…	6.22514	0.426514	1.34398		23.3263	4.86121	0.0037624	0.0157479	-2.20992	0.182733	0.735226	1	0.0037624	0.0157479
Mbd3	D3YTR5|Q9Z2D8|Q9Z2D8-2	D3YTR5	Methyl-CpG-binding domain protein 3 OS=Mus musculus GN=Mbd3 PE=1 SV=1|Methyl-CpG-binding domain protein 3 OS=Mus musculus GN=Mbd3 PE=1 SV=1|Isoform 2 of Methyl-CpG-binding domain protein 3 OS=Mus musculus GN=Mbd3	7.16759	0.426477	1.34395		23.8041	4.2785	0.00662357	0.0230562	-2.85005	0.240926	0.785459	1	0.00662357	0.0230562
Psme1	G3UXZ5|P97371|Q5HZK3	G3UXZ5	Proteasome activator complex subunit 1 (Fragment) OS=Mus musculus GN=Psme1 PE=1 SV=1|Proteasome activator complex subunit 1 OS=Mus musculus GN=Psme1 PE=1 SV=2|Proteasome (Prosome, macropain) 28 subunit, alpha OS=Mus musculus GN=Psme1 PE=1 SV=1	7.73873	0.426112	1.34361		26.3041	5.15139	0.00288721	0.0133847	-1.90926	0.157973	0.705931	1	0.00288721	0.0133847
Arrb1	J3QNU6|Q8BWG8|Q8BWG8-2	J3QNU6	Beta-arrestin-1 OS=Mus musculus GN=Arrb1 PE=1 SV=1|Beta-arrestin-1 OS=Mus musculus GN=Arrb1 PE=1 SV=1|Isoform 1B of Beta-arrestin-1 OS=Mus musculus GN=Arrb1	6.67985	0.426023	1.34353		23.8599	4.59159	0.00485942	0.0185756	-2.49993	0.208214	0.759848	1	0.00485942	0.0185756
Snap29	Q9ERB0	Q9ERB0	Synaptosomal-associated protein 29 OS=Mus musculus GN=Snap29 PE=1 SV=1	7.10456	0.424897	1.34248		24.4394	7.48695	0.000477068	0.0049564	0.139194	0.0401631	0.389214	0.747374	0.000477068	0.0049564
Ssbp3	B1AS34|B1AS37|Q9D032|Q9D032-2	B1AS34	Single-stranded DNA-binding protein 3 (Fragment) OS=Mus musculus GN=Ssbp3 PE=1 SV=7|Single-stranded DNA-binding protein 3 OS=Mus musculus GN=Ssbp3 PE=1 SV=1|Single-stranded DNA-binding protein 3 OS=Mus musculus GN=Ssbp3 PE=1 SV=2|Isoform 2 of Single-stranded DNA-binding protein 3 OS=Mus musculus GN=Ssbp3	6.48035	0.424522	1.34213		22.3336	4.88913	0.00366602	0.0154705	-2.18048	0.180232	0.732535	1	0.00366602	0.0154705
Smarca2	F2Z4A9|H3BLH0|Q6DIC0	F2Z4A9	Probable global transcription activator SNF2L2 OS=Mus musculus GN=Smarca2 PE=1 SV=1|Probable global transcription activator SNF2L2 OS=Mus musculus GN=Smarca2 PE=1 SV=1|Probable global transcription activator SNF2L2 OS=Mus musculus GN=Smarca2 PE=1 SV=1	7.0267	0.423911	1.34156		25.5323	5.39226	0.00233602	0.0116661	-1.6684	0.139424	0.679352	1	0.00233602	0.0116661
Ccdc124	Q9D8X2	Q9D8X2	Coiled-coil domain-containing protein 124 OS=Mus musculus GN=Ccdc124 PE=1 SV=1	7.27073	0.423341	1.34103		25.5287	2.29114	0.0666685	0.120872	-5.39007	0.530025	0.889555	1	0.0666685	0.120872
Tmc6	B1ATB3|Q7TN60|Q7TN60-2	B1ATB3	Transmembrane channel-like protein OS=Mus musculus GN=Tmc6 PE=1 SV=1|Transmembrane channel-like protein 6 OS=Mus musculus GN=Tmc6 PE=1 SV=2|Isoform 2 of Transmembrane channel-like protein 6 OS=Mus musculus GN=Tmc6	6.59854	0.422306	1.34007		22.777	3.59786	0.0136514	0.0380017	-3.66198	0.324073	0.831213	1	0.0136514	0.0380017
Zak	Q9ESL4|Q9ESL4-2	Q9ESL4	Mitogen-activated protein kinase kinase kinase MLT OS=Mus musculus GN=Zak PE=1 SV=1|Isoform 2 of Mitogen-activated protein kinase kinase kinase MLT OS=Mus musculus GN=Zak	7.25774	0.421916	1.33971		25.5783	7.68094	0.000419815	0.00468555	0.284292	0.0352708	0.368062	0.641541	0.000419815	0.00468555
Ero1b	Q8R2E9	Q8R2E9	ERO1-like protein beta OS=Mus musculus GN=Ero1b PE=1 SV=1	6.53108	0.421895	1.33969		23.5845	6.19897	0.0012053	0.00797773	-0.915109	0.0893097	0.575759	1	0.0012053	0.00797773
Obfc1	Q3UXU8|Q8K2X3	Q3UXU8	CST complex subunit STN1 OS=Mus musculus GN=Obfc1 PE=1 SV=1|CST complex subunit STN1 OS=Mus musculus GN=Obfc1 PE=1 SV=2	7.24421	0.421104	1.33895		25.906	7.90495	0.000363424	0.00448917	0.447855	0.0302627	0.343808	0.641541	0.000363424	0.00448917
Dnajb6	O54946	O54946	DnaJ homolog subfamily B member 6 OS=Mus musculus GN=Dnajb6 PE=1 SV=4	7.23069	0.421087	1.33894		24.7414	3.09452	0.0244063	0.0582188	-4.30587	0.396347	0.857608	1	0.0244063	0.0582188
Fmnl3	D3Z7A7|Q6ZPF4|Q6ZPF4-2	D3Z7A7	Formin-like protein 3 OS=Mus musculus GN=Fmnl3 PE=1 SV=1|Formin-like protein 3 OS=Mus musculus GN=Fmnl3 PE=1 SV=2|Isoform 2 of Formin-like protein 3 OS=Mus musculus GN=Fmnl3	6.50816	0.42081	1.33868		23.549	6.93815	0.000695858	0.00599778	-0.289821	0.0572173	0.46509	1	0.000695858	0.00599778
Zwint	Q9CQU5	Q9CQU5	ZW10 interactor OS=Mus musculus GN=Zwint PE=1 SV=1	7.1433	0.418849	1.33686		25.4799	4.76843	0.00410417	0.0166398	-2.30854	0.191227	0.743976	1	0.00410417	0.0166398
Ccdc12	Q8R344	Q8R344	Coiled-coil domain-containing protein 12 OS=Mus musculus GN=Ccdc12 PE=1 SV=2	6.85835	0.418629	1.33666		24.6518	2.29318	0.0664912	0.120588	-5.38726	0.529658	0.889487	1	0.0664912	0.120588
Myh14	K3W4R2|Q6URW6|Q6URW6-2|Q6URW6-3	K3W4R2	Myosin-14 OS=Mus musculus GN=Myh14 PE=1 SV=1|Myosin-14 OS=Mus musculus GN=Myh14 PE=1 SV=1|Isoform 2 of Myosin-14 OS=Mus musculus GN=Myh14|Isoform 3 of Myosin-14 OS=Mus musculus GN=Myh14	6.61025	0.418282	1.33634		23.965	5.2905	0.00255253	0.0123945	-1.76921	0.147044	0.690832	1	0.00255253	0.0123945
Pnpla8	E9PXB0|Q8K1N1	E9PXB0	Calcium-independent phospholipase A2-gamma OS=Mus musculus GN=Pnpla8 PE=1 SV=1|Calcium-independent phospholipase A2-gamma OS=Mus musculus GN=Pnpla8 PE=1 SV=1	7.03152	0.41758	1.33569		24.9832	5.37388	0.0023735	0.0117925	-1.68651	0.140777	0.681452	1	0.0023735	0.0117925
Lrrc42	Q8R2U7	Q8R2U7	Leucine-rich repeat-containing protein 42 OS=Mus musculus GN=Lrrc42 PE=1 SV=1	6.17932	0.4173	1.33543		23.8042	5.65709	0.00186524	0.0101705	-1.4123	0.121015	0.647756	1	0.00186524	0.0101705
Ubr3	Q5U430|Q5U430-3	Q5U430	E3 ubiquitin-protein ligase UBR3 OS=Mus musculus GN=Ubr3 PE=1 SV=3|Isoform 3 of E3 ubiquitin-protein ligase UBR3 OS=Mus musculus GN=Ubr3	6.94447	0.417232	1.33536		25.0047	7.35578	0.000520982	0.00514186	0.0391909	0.0437879	0.405293	0.747374	0.000520982	0.00514186
Dstyk	Q6XUX1|Q6XUX1-2|Q6XUX1-3	Q6XUX1	Dual serine/threonine and tyrosine protein kinase OS=Mus musculus GN=Dstyk PE=1 SV=1|Isoform 2 of Dual serine/threonine and tyrosine protein kinase OS=Mus musculus GN=Dstyk|Isoform 3 of Dual serine/threonine and tyrosine protein kinase OS=Mus musculus GN=Dstyk	6.52956	0.41709	1.33523		23.2343	5.06912	0.00310889	0.0140341	-1.99332	0.164719	0.714536	1	0.00310889	0.0140341
Tgfbr2	Q62312-2	Q62312	Isoform RII-1 of TGF-beta receptor type-2 OS=Mus musculus GN=Tgfbr2	6.74699	0.417084	1.33523		24.8549	3.62757	0.0132075	0.0372474	-3.62509	0.320093	0.829472	1	0.0132075	0.0372474
Golga4	Q91VW5	Q91VW5	Golgin subfamily A member 4 OS=Mus musculus GN=Golga4 PE=1 SV=2	7.16331	0.417079	1.33522		26.9645	7.76938	0.000396407	0.00464979	0.34937	0.0332149	0.358601	0.641541	0.000396407	0.00464979
Fam114a1	Q9D281	Q9D281	Protein Noxp20 OS=Mus musculus GN=Fam114a1 PE=1 SV=1	6.45594	0.416805	1.33497		22.9151	6.79944	0.000768528	0.00623258	-0.402825	0.0623737	0.486608	1	0.000768528	0.00623258
Hexb	P20060|Q3TXR9	P20060	Beta-hexosaminidase subunit beta OS=Mus musculus GN=Hexb PE=1 SV=2|Beta-hexosaminidase OS=Mus musculus GN=Hexb PE=1 SV=1	7.10978	0.416283	1.33448		25.0157	7.41621	0.000500189	0.00508758	0.0854532	0.0420851	0.397923	0.747374	0.000500189	0.00508758
Pld1	D6RH77|Q6NVF2|Q9Z280|Q9Z280-2	D6RH77	Phospholipase D1 OS=Mus musculus GN=Pld1 PE=1 SV=2|Phospholipase D1 OS=Mus musculus GN=Pld1 PE=1 SV=1|Phospholipase D1 OS=Mus musculus GN=Pld1 PE=2 SV=1|Isoform PLD1B of Phospholipase D1 OS=Mus musculus GN=Pld1	6.59552	0.416136	1.33435		24.0952	7.69638	0.000415612	0.00468555	0.295708	0.0349041	0.366421	0.641541	0.000415612	0.00468555
Zfp384	D3YX49|E9Q1A5|E9QAR1|E9QAR4|E9QAR6	D3YX49	Protein Zfp384 OS=Mus musculus GN=Zfp384 PE=1 SV=1|Protein Zfp384 OS=Mus musculus GN=Zfp384 PE=1 SV=1|Protein Zfp384 OS=Mus musculus GN=Zfp384 PE=1 SV=1|Protein Zfp384 OS=Mus musculus GN=Zfp384 PE=1 SV=1|Protein Zfp384 OS=Mus musculus GN=Zfp384 PE=1 SV=1	6.6128	0.41601	1.33423		21.9416	2.74463	0.0373993	0.0785217	-4.77198	0.451892	0.872886	1	0.0373993	0.0785217
Rai1	Q61818|Q61818-2	Q61818	Retinoic acid-induced protein 1 OS=Mus musculus GN=Rai1 PE=1 SV=3|Isoform 2 of Retinoic acid-induced protein 1 OS=Mus musculus GN=Rai1	6.59535	0.415723	1.33397		23.972	5.744	0.00173542	0.00985538	-1.33018	0.115407	0.636855	1	0.00173542	0.00985538
Ube2h	P62257|Q3V2N4	P62257	Ubiquitin-conjugating enzyme E2 H OS=Mus musculus GN=Ube2h PE=1 SV=1|Ubiquitin-conjugating enzyme E2 H OS=Mus musculus GN=Ube2h PE=1 SV=1	7.2901	0.41565	1.3339		24.6197	4.69839	0.00438592	0.0173522	-2.3838	0.197829	0.750387	1	0.00438592	0.0173522
Tbc1d5	Q80XQ2	Q80XQ2	TBC1 domain family member 5 OS=Mus musculus GN=Tbc1d5 PE=1 SV=2	6.76385	0.41536	1.33363		23.4854	5.56906	0.00200834	0.0106185	-1.49643	0.12691	0.658531	1	0.00200834	0.0106185
Aida	Q8C4Q6	Q8C4Q6	Axin interactor, dorsalization-associated protein OS=Mus musculus GN=Aida PE=1 SV=1	5.87758	0.414964	1.33327		21.7822	3.02611	0.026492	0.0617264	-4.39595	0.40687	0.860779	1	0.026492	0.0617264
Cd2ap	Q9JLQ0	Q9JLQ0	CD2-associated protein OS=Mus musculus GN=Cd2ap PE=1 SV=3	7.64739	0.41492	1.33322		27.2555	7.76085	0.000398595	0.00465668	0.343127	0.0334085	0.359519	0.641541	0.000398595	0.00465668
Pcx|Pc	E9QPD7|G5E8R3|Q05920	E9QPD7	Pyruvate carboxylase OS=Mus musculus GN=Pcx PE=1 SV=1|Pyruvate carboxylase OS=Mus musculus GN=Pcx PE=1 SV=1|Pyruvate carboxylase, mitochondrial OS=Mus musculus GN=Pc PE=1 SV=1	8.13028	0.41483	1.33314		28.0321	6.49357	0.000962485	0.00707932	-0.658961	0.0751097	0.533009	1	0.000962485	0.00707932
Pggt1b	Q8BUY9	Q8BUY9	Geranylgeranyl transferase type-1 subunit beta OS=Mus musculus GN=Pggt1b PE=1 SV=1	7.26493	0.41445	1.33279		25.2077	6.92216	0.000703813	0.00600859	-0.302751	0.057793	0.467582	1	0.000703813	0.00600859
Ak3	Q9WTP7	Q9WTP7	GTP:AMP phosphotransferase AK3, mitochondrial OS=Mus musculus GN=Ak3 PE=1 SV=3	7.38225	0.414064	1.33243		26.1764	6.24236	0.0011654	0.00779345	-0.876777	0.0870916	0.569605	1	0.0011654	0.00779345
Rabep2	Q91WG2|Q91WG2-1	Q91WG2	Rab GTPase-binding effector protein 2 OS=Mus musculus GN=Rabep2 PE=1 SV=3|Isoform 2 of Rab GTPase-binding effector protein 2 OS=Mus musculus GN=Rabep2	7.08648	0.413819	1.33221		26.0587	7.13264	0.000607043	0.00555311	-0.134548	0.0505885	0.434627	1	0.000607043	0.00555311
Ptrf	O54724	O54724	Polymerase I and transcript release factor OS=Mus musculus GN=Ptrf PE=1 SV=1	7.61602	0.41348	1.33189		25.4685	3.04135	0.0260108	0.0609468	-4.37583	0.404511	0.86008	1	0.0260108	0.0609468
Ripk2	P58801|Q547H1	P58801	Receptor-interacting serine/threonine-protein kinase 2 OS=Mus musculus GN=Ripk2 PE=1 SV=1|Receptor-interacting serine/threonine-protein kinase 2 OS=Mus musculus GN=Ripk2 PE=1 SV=1	6.96703	0.412511	1.331		24.8417	2.01841	0.0953644	0.15948	-5.76242	0.580114	0.898119	1	0.0953644	0.15948
Pdlim5	Q8CI51	Q8CI51	PDZ and LIM domain protein 5 OS=Mus musculus GN=Pdlim5 PE=1 SV=4	7.80348	0.412508	1.331		26.1121	6.29949	0.00111519	0.00764949	-0.826634	0.0842394	0.561423	1	0.00111519	0.00764949
Cdk6	Q0VBK8|Q64261	Q0VBK8	Cyclin-dependent kinase 6 OS=Mus musculus GN=Cdk6 PE=1 SV=1|Cyclin-dependent kinase 6 OS=Mus musculus GN=Cdk6 PE=1 SV=2	7.43939	0.411728	1.33028		25.4645	7.59892	0.000442981	0.00478157	0.223346	0.0372734	0.37669	0.641541	0.000442981	0.00478157
Adcy6	F8VQ52|Q01341	F8VQ52	Adenylate cyclase type 6 OS=Mus musculus GN=Adcy6 PE=1 SV=1|Adenylate cyclase type 6 OS=Mus musculus GN=Adcy6 PE=1 SV=1	6.46334	0.411366	1.32994		22.9711	7.28684	0.000545951	0.00528626	-0.0139954	0.0458014	0.414008	0.783346	0.000545951	0.00528626
Dhx57	Q6P5D3	Q6P5D3	Putative ATP-dependent RNA helicase DHX57 OS=Mus musculus GN=Dhx57 PE=1 SV=2	6.75748	0.411219	1.32981		25.053	7.71915	0.000409508	0.00468078	0.312491	0.0343696	0.363994	0.641541	0.000409508	0.00468078
Nadk	P58058	P58058	NAD kinase OS=Mus musculus GN=Nadk PE=1 SV=2	6.36797	0.410949	1.32956		21.8075	4.59719	0.0048332	0.0185119	-2.4938	0.207661	0.759362	1	0.0048332	0.0185119
Zfp185	G5E8W8	G5E8W8	Zinc finger protein 185 OS=Mus musculus GN=Zfp185 PE=1 SV=1	7.43492	0.410367	1.32902		24.788	5.30228	0.00252632	0.0123081	-1.75747	0.146146	0.689522	1	0.00252632	0.0123081
Casp2	P29594	P29594	Caspase-2 OS=Mus musculus GN=Casp2 PE=1 SV=5	6.55209	0.410205	1.32887		22.2031	4.09421	0.00800087	0.026296	-3.063	0.261793	0.799124	1	0.00800087	0.026296
Calm1	P62204	P0DP26	Calmodulin OS=Mus musculus GN=Calm1 PE=1 SV=2	7.8344	0.410199	1.32887		25.6863	3.61424	0.0134046	0.0375846	-3.64162	0.321875	0.830256	1	0.0134046	0.0375846
Diaph2	E9Q4U7|O70566|Q6W4W7	E9Q4U7	Protein diaphanous homolog 2 OS=Mus musculus GN=Diaph2 PE=1 SV=1|Protein diaphanous homolog 2 OS=Mus musculus GN=Diaph2 PE=1 SV=2|DIA3 OS=Mus musculus GN=Diaph2 PE=1 SV=1	7.01726	0.410018	1.3287		25.5158	7.53841	0.000461036	0.00485279	0.178003	0.0388123	0.382958	0.641541	0.000461036	0.00485279
Tsen34	A0A0U1RPF7|D3YWG5|D3YY06|D6RH65|H7BX14|Q8BMZ5|Q8BMZ5-2	Q8BMZ5	tRNA-splicing endonuclease subunit Sen34 OS=Mus musculus GN=Tsen34 PE=1 SV=1|tRNA-splicing endonuclease subunit Sen34 (Fragment) OS=Mus musculus GN=Tsen34 PE=1 SV=1|tRNA-splicing endonuclease subunit Sen34 (Fragment) OS=Mus musculus GN=Tsen34 PE=1 SV=7|tRNA-splicing endonuclease subunit Sen34 OS=Mus musculus GN=Tsen34 PE=1 SV=1|tRNA-splicing endonuclease subunit Sen34 OS=Mus musculus GN=Tsen34 PE…	6.71387	0.409908	1.3286		24.171	3.28831	0.0194229	0.0493461	-4.05388	0.36744	0.848108	1	0.0194229	0.0493461
Pja2	Q80U04|Q80U04-2	Q80U04	E3 ubiquitin-protein ligase Praja-2 OS=Mus musculus GN=Pja2 PE=1 SV=2|Isoform 2 of E3 ubiquitin-protein ligase Praja-2 OS=Mus musculus GN=Pja2	6.95641	0.40916	1.32791		24.3318	5.75113	0.00172525	0.00982143	-1.32349	0.114956	0.63595	1	0.00172525	0.00982143
Zfp512b	B7ZCR6|Q6PHP4	B7ZCR6	Protein Zfp512b OS=Mus musculus GN=Zfp512b PE=1 SV=1|MCG140111, isoform CRA_c (Fragment) OS=Mus musculus GN=Zfp512b PE=1 SV=1	6.54793	0.408905	1.32768		23.5152	2.78927	0.0353818	0.0756806	-4.71182	0.44457	0.871062	1	0.0353818	0.0756806
Zmym3	B1AXS5|B1AXS6|B1AXS7|B1AXS8|Q9JLM4	B1AXS5	Zinc finger MYM-type protein 3 OS=Mus musculus GN=Zmym3 PE=1 SV=1|Zinc finger MYM-type protein 3 OS=Mus musculus GN=Zmym3 PE=1 SV=1|Zinc finger MYM-type protein 3 OS=Mus musculus GN=Zmym3 PE=1 SV=1|Zinc finger MYM-type protein 3 OS=Mus musculus GN=Zmym3 PE=1 SV=1|Zinc finger MYM-type protein 3 OS=Mus musculus GN=Zmym3 PE=1 SV=1	6.73498	0.407759	1.32662		24.1332	6.90926	0.000710305	0.00601608	-0.313195	0.0582608	0.469589	1	0.000710305	0.00601608
Atp9b	D3YV00	D3YV00	Phospholipid-transporting ATPase OS=Mus musculus GN=Atp9b PE=1 SV=1	6.88315	0.407655	1.32653		25.8375	5.57367	0.00200053	0.0105906	-1.492	0.126596	0.657973	1	0.00200053	0.0105906
Ythdf3	Q8BYK6|Q8BYK6-3	Q8BYK6	YTH domain-containing family protein 3 OS=Mus musculus GN=Ythdf3 PE=1 SV=2|Isoform 3 of YTH domain-containing family protein 3 OS=Mus musculus GN=Ythdf3	7.4897	0.407621	1.3265		25.517	5.33301	0.00245937	0.012126	-1.72693	0.143823	0.686081	1	0.00245937	0.012126
Comt	O88587|O88587-2	O88587	Catechol O-methyltransferase OS=Mus musculus GN=Comt PE=1 SV=2|Isoform Soluble of Catechol O-methyltransferase OS=Mus musculus GN=Comt	7.45573	0.407481	1.32637		25.8162	5.16929	0.00284141	0.0132356	-1.89109	0.156533	0.704026	1	0.00284141	0.0132356
Adgrl2	A0A0G2JDE3|A0A0G2JDF4|A0A0G2JDK6|A0A0G2JFF5|A0A0G2JFV3|A0A0G2JG66|A0A0G2JGM8|Q8JZZ7|Q8JZZ7-2	Q8JZZ7	Adhesion G protein-coupled receptor L2 OS=Mus musculus GN=Adgrl2 PE=1 SV=1|Adhesion G protein-coupled receptor L2 OS=Mus musculus GN=Adgrl2 PE=1 SV=1|Adhesion G protein-coupled receptor L2 OS=Mus musculus GN=Adgrl2 PE=1 SV=1|Adhesion G protein-coupled receptor L2 OS=Mus musculus GN=Adgrl2 PE=1 SV=1|Adhesion G protein-coupled receptor L2 OS=Mus musculus GN=Adgrl2 PE=1 SV=1|Adhesion G protein-coupl…	6.4554	0.406744	1.32569		23.4737	5.61774	0.00192769	0.0103749	-1.44978	0.123623	0.652606	1	0.00192769	0.0103749
Arhgef12	F8VQN6|Q8R4H2	F8VQN6	Rho guanine nucleotide exchange factor 12 OS=Mus musculus GN=Arhgef12 PE=1 SV=1|Rho guanine nucleotide exchange factor 12 OS=Mus musculus GN=Arhgef12 PE=1 SV=2	7.09351	0.40661	1.32557		26.0934	6.97231	0.000679213	0.00588921	-0.262283	0.0560032	0.459759	1	0.000679213	0.00588921
Pitpnm1	O35954	O35954	Membrane-associated phosphatidylinositol transfer protein 1 OS=Mus musculus GN=Pitpnm1 PE=1 SV=1	6.52566	0.406299	1.32528		23.7486	5.54364	0.00205201	0.0107361	-1.52091	0.128654	0.661593	1	0.00205201	0.0107361
Vav1	E9PXI0|P27870|Q3U9E2	E9PXI0	Proto-oncogene vav OS=Mus musculus GN=Vav1 PE=1 SV=1|Proto-oncogene vav OS=Mus musculus GN=Vav1 PE=1 SV=1|Proto-oncogene vav OS=Mus musculus GN=Vav1 PE=1 SV=1	6.19413	0.406093	1.32509		23.1482	5.94013	0.00147914	0.00897435	-1.14825	0.103502	0.611322	1	0.00147914	0.00897435
Dsp	E9Q557	E9Q557	Desmoplakin OS=Mus musculus GN=Dsp PE=1 SV=1	7.89526	0.405039	1.32412		29.0287	3.42397	0.0166111	0.0441496	-3.88046	0.348007	0.840975	1	0.0166111	0.0441496
Akr1c12	Q9JLI0	Q9JLI0	Aldo-keto reductase a OS=Mus musculus GN=Akr1c12 PE=1 SV=1	6.79989	0.404776	1.32388		23.6441	6.5202	0.000943491	0.00699279	-0.63627	0.0739224	0.52904	1	0.000943491	0.00699279
Mical1	Q8VDP3|Q8VDP3-3	Q8VDP3	Protein-methionine sulfoxide oxidase MICAL1 OS=Mus musculus GN=Mical1 PE=1 SV=1|Isoform 3 of Protein-methionine sulfoxide oxidase MICAL1 OS=Mus musculus GN=Mical1	7.20452	0.404534	1.32366		25.9118	5.96525	0.00144961	0.00887771	-1.12528	0.102051	0.607961	1	0.00144961	0.00887771
Hmg20a	Q9DC33|Q9DC33-2	Q9DC33	High mobility group protein 20A OS=Mus musculus GN=Hmg20a PE=1 SV=1|Isoform 2 of High mobility group protein 20A OS=Mus musculus GN=Hmg20a	6.72674	0.403617	1.32282		23.8395	4.41436	0.00578074	0.0210334	-2.69634	0.226312	0.774726	1	0.00578074	0.0210334
Fdxr	Q61578	Q61578	NADPH:adrenodoxin oxidoreductase, mitochondrial OS=Mus musculus GN=Fdxr PE=1 SV=1	7.13486	0.402123	1.32145		24.4148	6.03296	0.00137335	0.00858236	-1.06375	0.0982195	0.598804	1	0.00137335	0.00858236
B3gnt3	Q5JCS9	Q5JCS9	N-acetyllactosaminide beta-1,3-N-acetylglucosaminyltransferase 3 OS=Mus musculus GN=B3gnt3 PE=2 SV=1	6.07497	0.401842	1.32119		22.1349	6.1528	0.00124951	0.00814984	-0.956133	0.0917198	0.58225	1	0.00124951	0.00814984
Tnfrsf10b	Q9QZM4	Q9QZM4	Tumor necrosis factor receptor superfamily member 10B OS=Mus musculus GN=Tnfrsf10b PE=2 SV=3	6.31175	0.401697	1.32106		23.3092	5.50677	0.00211731	0.0109033	-1.55656	0.131215	0.665993	1	0.00211731	0.0109033
Topbp1	Q6ZQF0	Q6ZQF0	DNA topoisomerase 2-binding protein 1 OS=Mus musculus GN=Topbp1 PE=1 SV=2	7.318	0.401503	1.32088		26.6296	5.13412	0.00293217	0.0135177	-1.92683	0.159371	0.707756	1	0.00293217	0.0135177
Pacsin3	Q543N7|Q99JB8	Q543N7	Protein kinase C and casein kinase II substrate protein 3 OS=Mus musculus GN=Pacsin3 PE=1 SV=1|Protein kinase C and casein kinase II substrate protein 3 OS=Mus musculus GN=Pacsin3 PE=1 SV=1	6.99701	0.401158	1.32057		24.6432	5.66824	0.00184797	0.0101256	-1.40172	0.120284	0.646373	1	0.00184797	0.0101256
Mocos	Q14CH1	Q14CH1	Molybdenum cofactor sulfurase OS=Mus musculus GN=Mocos PE=1 SV=1	6.69739	0.401074	1.32049		24.3517	7.20742	0.000576467	0.00544865	-0.0758025	0.0482168	0.424343	0.811024	0.000576467	0.00544865
Mast2	E9Q1Q1|E9QLW6	E9Q1Q1	Microtubule-associated serine/threonine-protein kinase 2 OS=Mus musculus GN=Mast2 PE=1 SV=1|Microtubule-associated serine/threonine-protein kinase 2 OS=Mus musculus GN=Mast2 PE=1 SV=1	6.25792	0.400771	1.32021		22.7156	7.54365	0.000459439	0.00485279	0.181942	0.038677	0.382419	0.641541	0.000459439	0.00485279
Cars2	G3X975|Q8BYM8	G3X975	MCG11180, isoform CRA_a OS=Mus musculus GN=Cars2 PE=1 SV=1|Probable cysteine--tRNA ligase, mitochondrial OS=Mus musculus GN=Cars2 PE=1 SV=2	6.86035	0.400512	1.31998		24.4647	7.38301	0.000511491	0.00513965	0.0600744	0.0430137	0.401981	0.747374	0.000511491	0.00513965
Dpy19l4	A2AJQ3|A2AJQ3-2	A2AJQ3	Probable C-mannosyltransferase DPY19L4 OS=Mus musculus GN=Dpy19l4 PE=2 SV=1|Isoform 2 of Probable C-mannosyltransferase DPY19L4 OS=Mus musculus GN=Dpy19l4	6.75403	0.400482	1.31995		23.4603	5.66802	0.0018483	0.0101256	-1.40192	0.120298	0.646399	1	0.0018483	0.0101256
Osbpl11	G5E8A0	G5E8A0	Oxysterol-binding protein OS=Mus musculus GN=Osbpl11 PE=1 SV=1	7.35453	0.400297	1.31978		25.3918	6.19359	0.00121036	0.00798949	-0.91988	0.0895881	0.576519	1	0.00121036	0.00798949
Klhl9	Q6ZPT1	Q6ZPT1	Kelch-like protein 9 OS=Mus musculus GN=Klhl9 PE=2 SV=2	6.72955	0.400231	1.31972		23.9426	5.71624	0.00177571	0.0099484	-1.35631	0.117175	0.640365	1	0.00177571	0.0099484
Ddhd2	Q80Y98	Q80Y98	Phospholipase DDHD2 OS=Mus musculus GN=Ddhd2 PE=1 SV=3	7.67646	0.399742	1.31927		25.9854	5.8885	0.00154207	0.00915488	-1.19569	0.106537	0.618166	1	0.00154207	0.00915488
Ahi1	E9QP54|Q8K3E5	E9QP54	Jouberin OS=Mus musculus GN=Ahi1 PE=1 SV=1|Jouberin OS=Mus musculus GN=Ahi1 PE=1 SV=2	6.46461	0.3997	1.31923		24.0704	4.5479	0.00506986	0.0191039	-2.54792	0.212576	0.76361	1	0.00506986	0.0191039
B4galnt1	Q09200|Q3UN35	Q09200	Beta-1,4 N-acetylgalactosaminyltransferase 1 OS=Mus musculus GN=B4galnt1 PE=1 SV=1|Beta-1,4 N-acetylgalactosaminyltransferase 1 OS=Mus musculus GN=B4galnt1 PE=1 SV=1	6.47327	0.399642	1.31918		23.2333	3.66997	0.0126021	0.0360591	-3.57268	0.314471	0.826951	1	0.0126021	0.0360591
Bahd1	Q497V6|Q497V6-2|Z4YJL0	Q497V6	Bromo adjacent homology domain-containing 1 protein OS=Mus musculus GN=Bahd1 PE=1 SV=1|Isoform 2 of Bromo adjacent homology domain-containing 1 protein OS=Mus musculus GN=Bahd1|Bromo adjacent homology domain-containing 1 protein OS=Mus musculus GN=Bahd1 PE=1 SV=1	6.52815	0.399523	1.31907		22.3458	4.18797	0.00726316	0.024611	-2.95402	0.251025	0.792298	1	0.00726316	0.024611
Fgfr1op	Q66JX5|Q66JX5-2	Q66JX5	FGFR1 oncogene partner OS=Mus musculus GN=Fgfr1op PE=1 SV=1|Isoform 2 of FGFR1 oncogene partner OS=Mus musculus GN=Fgfr1op	5.90805	0.398072	1.31775		21.216	6.22392	0.00118217	0.00788746	-0.893046	0.088029	0.572227	1	0.00118217	0.00788746
Kifc1	Q9QWT9	Q9QWT9	Kinesin-like protein KIFC1 OS=Mus musculus GN=Kifc1 PE=1 SV=2	6.98843	0.398067	1.31774		23.5936	5.70867	0.00178689	0.0099771	-1.36345	0.117662	0.641318	1	0.00178689	0.0099771
Akt3	Q9WUA6|Q9WUA6-2	Q9WUA6	RAC-gamma serine/threonine-protein kinase OS=Mus musculus GN=Akt3 PE=1 SV=1|Isoform 2 of RAC-gamma serine/threonine-protein kinase OS=Mus musculus GN=Akt3	7.17108	0.397372	1.31711		24.8074	5.95618	0.00146019	0.00889572	-1.13357	0.102573	0.609177	1	0.00146019	0.00889572
Phospho1	Q8R2H9	Q8R2H9	Phosphoethanolamine/phosphocholine phosphatase OS=Mus musculus GN=Phospho1 PE=1 SV=1	7.02181	0.397013	1.31678		24.7472	6.12252	0.00127952	0.00827142	-0.983163	0.0933282	0.586472	1	0.00127952	0.00827142
Kif18b	Q6PFD6	Q6PFD6	Kinesin-like protein KIF18B OS=Mus musculus GN=Kif18b PE=2 SV=2	6.41564	0.396408	1.31623		22.4532	2.59083	0.0453683	0.0908928	-4.98044	0.477636	0.878908	1	0.0453683	0.0908928
Txlna	Q6PAM1	Q6PAM1	Alpha-taxilin OS=Mus musculus GN=Txlna PE=1 SV=1	7.08546	0.396082	1.31593		25.8508	2.50869	0.0503631	0.098096	-5.0924	0.491707	0.881964	1	0.0503631	0.098096
Lrch3	B2RXP1|E9QAU9|Q8BVU0	B2RXP1	Leucine-rich repeat and calponin homology domain-containing protein 3 OS=Mus musculus GN=Lrch3 PE=1 SV=1|Leucine-rich repeat and calponin homology domain-containing protein 3 OS=Mus musculus GN=Lrch3 PE=1 SV=1|Leucine-rich repeat and calponin homology domain-containing protein 3 OS=Mus musculus GN=Lrch3 PE=1 SV=3	7.15752	0.396028	1.31588		25.1394	6.68087	0.000837746	0.00651605	-0.500961	0.0670808	0.504794	1	0.000837746	0.00651605
Cep97	Q9CZ62|Q9CZ62-2	Q9CZ62	Centrosomal protein of 97 kDa OS=Mus musculus GN=Cep97 PE=1 SV=1|Isoform 2 of Centrosomal protein of 97 kDa OS=Mus musculus GN=Cep97	7.00674	0.395955	1.31581		24.5997	5.89022	0.00153993	0.00915356	-1.19411	0.106435	0.61794	1	0.00153993	0.00915356
Ccdc174	A0A0R4J0L8|Q3U155	Q3U155	Coiled-coil domain-containing protein 174 OS=Mus musculus GN=Ccdc174 PE=1 SV=1|Coiled-coil domain-containing protein 174 OS=Mus musculus GN=Ccdc174 PE=2 SV=1	6.58635	0.39588	1.31574		23.1619	4.71188	0.00432997	0.0171928	-2.36925	0.196545	0.749166	1	0.00432997	0.0171928
Dock7	A0A0U1RNK7|A2A9M4|A2A9M5|E9PX48|Q8R1A4|Q8R1A4-2	Q8R1A4	Dedicator of cytokinesis protein 7 OS=Mus musculus GN=Dock7 PE=1 SV=1|Dedicator of cytokinesis protein 7 OS=Mus musculus GN=Dock7 PE=1 SV=2|Dedicator of cytokinesis protein 7 OS=Mus musculus GN=Dock7 PE=1 SV=1|Dedicator of cytokinesis protein 7 OS=Mus musculus GN=Dock7 PE=1 SV=2|Dedicator of cytokinesis protein 7 OS=Mus musculus GN=Dock7 PE=1 SV=3|Isoform 2 of Dedicator of cytokinesis protein 7 O…	7.80956	0.395334	1.31525		27.8051	6.24325	0.0011646	0.00779345	-0.875995	0.0870467	0.569478	1	0.0011646	0.00779345
Prr11	Q8BHE0	Q8BHE0	Proline-rich protein 11 OS=Mus musculus GN=Prr11 PE=2 SV=1	7.02514	0.394893	1.31485		24.3621	6.1284	0.00127363	0.00824249	-0.977907	0.0930142	0.585654	1	0.00127363	0.00824249
Gpx8	Q9D7B7	Q9D7B7	Probable glutathione peroxidase 8 OS=Mus musculus GN=Gpx8 PE=1 SV=1	7.22874	0.393773	1.31382		24.0096	3.0778	0.0248988	0.0590547	-4.32784	0.398904	0.858392	1	0.0248988	0.0590547
Ifi35	Q9D8C4	Q9D8C4	Interferon-induced 35 kDa protein homolog OS=Mus musculus GN=Ifi35 PE=1 SV=3	6.53758	0.392362	1.31254		22.5158	5.65902	0.00186223	0.0101637	-1.41047	0.120888	0.647517	1	0.00186223	0.0101637
Erlin2	Q8BFZ9	Q8BFZ9	Erlin-2 OS=Mus musculus GN=Erlin2 PE=1 SV=1	7.84901	0.391356	1.31163		26.6791	6.80638	0.00076469	0.00623105	-0.397129	0.062107	0.485538	1	0.00076469	0.00623105
Srpk2	O54781	O54781	SRSF protein kinase 2 OS=Mus musculus GN=Srpk2 PE=1 SV=2	7.52035	0.389866	1.31027		25.3185	5.29314	0.00254664	0.0123779	-1.76658	0.146843	0.690539	1	0.00254664	0.0123779
Galk2	Q3U3H5|Q68FH4	Q3U3H5	N-acetylgalactosamine kinase OS=Mus musculus GN=Galk2 PE=1 SV=1|N-acetylgalactosamine kinase OS=Mus musculus GN=Galk2 PE=1 SV=1	7.21014	0.389429	1.30987		23.8696	3.02651	0.0264794	0.0617215	-4.39542	0.406808	0.86076	1	0.0264794	0.0617215
Fhod1	Q6P9Q4	Q6P9Q4	FH1/FH2 domain-containing protein 1 OS=Mus musculus GN=Fhod1 PE=1 SV=3	7.02502	0.389286	1.30974		25.4607	5.70241	0.00179619	0.00998898	-1.36936	0.118065	0.642104	1	0.00179619	0.00998898
Smarcd2	Q99JR8|Q99JR8-2	Q99JR8	SWI/SNF-related matrix-associated actin-dependent regulator of chromatin subfamily D member 2 OS=Mus musculus GN=Smarcd2 PE=1 SV=2|Isoform 2 of SWI/SNF-related matrix-associated actin-dependent regulator of chromatin subfamily D member 2 OS=Mus musculus GN=Smarcd2	6.82311	0.389099	1.30958		23.7676	4.00407	0.0087915	0.0280422	-3.16902	0.272441	0.805448	1	0.0087915	0.0280422
Rcbtb2	E9Q3B1|Q99LJ7|Q99LJ7-2	E9Q3B1	RCC1 and BTB domain-containing protein 2 OS=Mus musculus GN=Rcbtb2 PE=1 SV=1|RCC1 and BTB domain-containing protein 2 OS=Mus musculus GN=Rcbtb2 PE=2 SV=1|Isoform 2 of RCC1 and BTB domain-containing protein 2 OS=Mus musculus GN=Rcbtb2	6.68884	0.389017	1.3095		22.8225	6.58646	0.000898096	0.0067906	-0.580138	0.0710347	0.519102	1	0.000898096	0.0067906
Slc12a2	E9QM38|P55012	E9QM38	Solute carrier family 12 member 2 OS=Mus musculus GN=Slc12a2 PE=1 SV=1|Solute carrier family 12 member 2 OS=Mus musculus GN=Slc12a2 PE=1 SV=2	7.46236	0.388564	1.30909		25.8593	7.31296	0.00053633	0.00523552	0.00620554	0.0450296	0.410689	0.783346	0.00053633	0.00523552
Pafah1b3	Q3TJC2|Q61205	Q3TJC2	Platelet-activating factor acetylhydrolase IB subunit gamma OS=Mus musculus GN=Pafah1b3 PE=1 SV=1|Platelet-activating factor acetylhydrolase IB subunit gamma OS=Mus musculus GN=Pafah1b3 PE=1 SV=1	7.47966	0.38836	1.3089		25.7802	6.25464	0.00115439	0.00776443	-0.865967	0.0864719	0.567853	1	0.00115439	0.00776443
Irf2bp1	Q8R3Y8|Q8R3Y8-2	Q8R3Y8	Interferon regulatory factor 2-binding protein 1 OS=Mus musculus GN=Irf2bp1 PE=1 SV=2|Isoform 2 of Interferon regulatory factor 2-binding protein 1 OS=Mus musculus GN=Irf2bp1	7.24461	0.388357	1.3089		25.6212	4.43287	0.00567571	0.0207551	-2.67561	0.224371	0.773219	1	0.00567571	0.0207551
Sfxn3	Q3U4F0|Q91V61|Q91V61-2	Q3U4F0	Sideroflexin-3 OS=Mus musculus GN=Sfxn3 PE=1 SV=1|Sideroflexin-3 OS=Mus musculus GN=Sfxn3 PE=1 SV=1|Isoform 2 of Sideroflexin-3 OS=Mus musculus GN=Sfxn3	7.57418	0.387261	1.30791		24.3933	3.72394	0.0118761	0.0345994	-3.50633	0.307406	0.823675	1	0.0118761	0.0345994
Frk	Q922K9	Q922K9	Tyrosine-protein kinase FRK OS=Mus musculus GN=Frk PE=1 SV=3	6.52804	0.386841	1.30753		23.9978	7.29	0.000544776	0.00528626	-0.0115475	0.0457074	0.413607	0.783346	0.000544776	0.00528626
Isyna1	Q9JHU9	Q9JHU9	Inositol-3-phosphate synthase 1 OS=Mus musculus GN=Isyna1 PE=1 SV=1	8.08413	0.386048	1.30681		25.9127	6.59983	0.00088925	0.00678652	-0.56887	0.0704634	0.517086	1	0.00088925	0.00678652
Ddx4	Q3V086|Q61496	Q3V086	DEAD box polypeptide 4 OS=Mus musculus GN=Ddx4 PE=1 SV=1|Probable ATP-dependent RNA helicase DDX4 OS=Mus musculus GN=Ddx4 PE=1 SV=2	7.96765	0.385621	1.30642		23.1109	7.18436	0.000585702	0.00546969	-0.0938667	0.0489382	0.427347	0.811024	0.000585702	0.00546969
Tceb3	Q8CB77	Q8CB77	Transcription elongation factor B polypeptide 3 OS=Mus musculus GN=Tceb3 PE=1 SV=3	7.3685	0.38473	1.30562		25.8728	4.72131	0.00429132	0.0171358	-2.35909	0.19565	0.748307	1	0.00429132	0.0171358
Ccdc58	E9Q4B5|F8WJI3|Q8R3Q6	E9Q4B5	Coiled-coil domain-containing protein 58 OS=Mus musculus GN=Ccdc58 PE=1 SV=1|Coiled-coil domain-containing protein 58 OS=Mus musculus GN=Ccdc58 PE=1 SV=1|Coiled-coil domain-containing protein 58 OS=Mus musculus GN=Ccdc58 PE=1 SV=1	6.84731	0.384373	1.30529		23.5801	2.04179	0.0924633	0.155838	-5.73067	0.575735	0.897424	1	0.0924633	0.155838
Brf1	G3X8S2|Q8CFK2	G3X8S2	BRF1 homolog, subunit of RNA polymerase III transcription initiation factor IIIB (S. cerevisiae) OS=Mus musculus GN=Brf1 PE=1 SV=1|Transcription factor IIIB 90 kDa subunit OS=Mus musculus GN=Brf1 PE=1 SV=1	6.73622	0.384186	1.30512		24.0385	1.37834	0.222474	0.308915	-6.5932	0.705591	0.914692	1	0.222474	0.308915
Rab3d	P35276|Q543Q4	P35276	Ras-related protein Rab-3D OS=Mus musculus GN=Rab3d PE=1 SV=1|RAB3D, member RAS oncogene family, isoform CRA_a OS=Mus musculus GN=Rab3d PE=1 SV=1	7.11326	0.384064	1.30501		24.0659	7.15583	0.00059736	0.00550783	-0.116269	0.0498426	0.431047	0.811024	0.00059736	0.00550783
Mapre2	D3YYK8|E9Q6X0|Q8R001|Q8R001-2	D3YYK8	Microtubule-associated protein RP/EB family member 2 (Fragment) OS=Mus musculus GN=Mapre2 PE=1 SV=1|Microtubule-associated protein RP/EB family member 2 OS=Mus musculus GN=Mapre2 PE=1 SV=1|Microtubule-associated protein RP/EB family member 2 OS=Mus musculus GN=Mapre2 PE=1 SV=1|Isoform 2 of Microtubule-associated protein RP/EB family member 2 OS=Mus musculus GN=Mapre2	7.46192	0.383716	1.3047		25.1092	5.78925	0.001672	0.00963667	-1.2878	0.112569	0.631078	1	0.001672	0.00963667
Pdxdc1	Q99K01|Q99K01-2|Q99K01-4	Q99K01	Pyridoxal-dependent decarboxylase domain-containing protein 1 OS=Mus musculus GN=Pdxdc1 PE=1 SV=2|Isoform 2 of Pyridoxal-dependent decarboxylase domain-containing protein 1 OS=Mus musculus GN=Pdxdc1|Isoform 4 of Pyridoxal-dependent decarboxylase domain-containing protein 1 OS=Mus musculus GN=Pdxdc1	7.57185	0.38311	1.30415		26.6129	6.92591	0.000701936	0.00600621	-0.299712	0.0576574	0.466997	1	0.000701936	0.00600621
Btbd1	P58544	P58544	BTB/POZ domain-containing protein 1 OS=Mus musculus GN=Btbd1 PE=2 SV=3	6.52252	0.382854	1.30392		23.5487	5.23325	0.00268453	0.0127917	-1.82654	0.15147	0.697129	1	0.00268453	0.0127917
Hsd17b11	Q9EQ06|Q9EQ06-2	Q9EQ06	Estradiol 17-beta-dehydrogenase 11 OS=Mus musculus GN=Hsd17b11 PE=1 SV=1|Isoform 2 of Estradiol 17-beta-dehydrogenase 11 OS=Mus musculus GN=Hsd17b11	6.83321	0.381991	1.30314		23.8122	5.70149	0.00179756	0.00998898	-1.37023	0.118124	0.64222	1	0.00179756	0.00998898
Opa1	P58281-2	P58281	Isoform 2 of Dynamin-like 120 kDa protein, mitochondrial OS=Mus musculus GN=Opa1	7.81414	0.381756	1.30293		26.1977	6.35323	0.00107025	0.00759971	-0.779796	0.0816259	0.553649	1	0.00107025	0.00759971
Pls3	Q99K51	Q99K51	Plastin-3 OS=Mus musculus GN=Pls3 PE=1 SV=3	8.24067	0.380854	1.30211		27.3167	5.91862	0.001505	0.00905491	-1.16798	0.104759	0.614185	1	0.001505	0.00905491
Tgfbrap1	Q3UR70	Q3UR70	Transforming growth factor-beta receptor-associated protein 1 OS=Mus musculus GN=Tgfbrap1 PE=1 SV=1	6.60249	0.380296	1.30161		23.5601	7.18499	0.000585447	0.00546969	-0.093371	0.0489183	0.427264	0.811024	0.000585447	0.00546969
Med1	Q925J9|Q925J9-4	Q925J9	Mediator of RNA polymerase II transcription subunit 1 OS=Mus musculus GN=Med1 PE=1 SV=2|Isoform 4 of Mediator of RNA polymerase II transcription subunit 1 OS=Mus musculus GN=Med1	7.48502	0.380222	1.30154		26.1728	2.63951	0.0426629	0.0869092	-4.91427	0.469402	0.877045	1	0.0426629	0.0869092
Kazn	F6RLJ7|G3UY74|G3UZT9|Q69ZS8|Q69ZS8-2|Q69ZS8-3	F6RLJ7	Kazrin (Fragment) OS=Mus musculus GN=Kazn PE=1 SV=1|Kazrin (Fragment) OS=Mus musculus GN=Kazn PE=1 SV=1|Kazrin (Fragment) OS=Mus musculus GN=Kazn PE=1 SV=1|Kazrin OS=Mus musculus GN=Kazn PE=1 SV=2|Isoform 2 of Kazrin OS=Mus musculus GN=Kazn|Isoform 3 of Kazrin OS=Mus musculus GN=Kazn	6.2877	0.380218	1.30154		22.9312	5.25318	0.0026377	0.0126723	-1.80653	0.149918	0.69495	1	0.0026377	0.0126723
Kctd10	F8WGQ9|Q922M3	F8WGQ9	BTB/POZ domain-containing adapter for CUL3-mediated RhoA degradation protein 3 OS=Mus musculus GN=Kctd10 PE=1 SV=1|BTB/POZ domain-containing adapter for CUL3-mediated RhoA degradation protein 3 OS=Mus musculus GN=Kctd10 PE=1 SV=1	7.06521	0.380024	1.30136		25.1326	3.13532	0.0232491	0.0561493	-4.25241	0.390149	0.855673	1	0.0232491	0.0561493
Abhd6	Q8R2Y0|Q8R2Y0-2	Q8R2Y0	Monoacylglycerol lipase ABHD6 OS=Mus musculus GN=Abhd6 PE=1 SV=1|Isoform 2 of Monoacylglycerol lipase ABHD6 OS=Mus musculus GN=Abhd6	6.41529	0.379801	1.30116		22.6262	6.13755	0.00126452	0.00820079	-0.969733	0.0925271	0.58438	1	0.00126452	0.00820079
Lzic	Q8K3C3	Q8K3C3	Protein LZIC OS=Mus musculus GN=Lzic PE=1 SV=1	7.2552	0.379487	1.30088		25.6291	5.8097	0.00164422	0.00956572	-1.26872	0.111304	0.628444	1	0.00164422	0.00956572
Evi5l	H3BKQ3|H3BL92	H3BKQ3	Protein Evi5l OS=Mus musculus GN=Evi5l PE=1 SV=1|Protein Evi5l OS=Mus musculus GN=Evi5l PE=1 SV=1	6.00643	0.379352	1.30076		21.5191	2.81609	0.034227	0.0739607	-4.67576	0.440203	0.86995	1	0.034227	0.0739607
Skt|Etl4	A2AQ25|E9QAU4	A2AQ25	Sickle tail protein OS=Mus musculus GN=Skt PE=1 SV=1|Sickle tail protein OS=Mus musculus GN=Etl4 PE=1 SV=1	7.56163	0.37925	1.30067		28.0809	6.33977	0.0010813	0.00762547	-0.791492	0.0822739	0.555602	1	0.0010813	0.00762547
Pck2	A0A0R4J0G0|Q8BH04	Q8BH04	Phosphoenolpyruvate carboxykinase [GTP], mitochondrial OS=Mus musculus GN=Pck2 PE=1 SV=1|Phosphoenolpyruvate carboxykinase [GTP], mitochondrial OS=Mus musculus GN=Pck2 PE=1 SV=1	7.10472	0.378576	1.30006		25.6815	6.64678	0.000858977	0.00661934	-0.529446	0.0684872	0.50998	1	0.000858977	0.00661934
Pml	D3YXR5|D3Z3A6|Q60953	D3YXR5	Protein PML OS=Mus musculus GN=Pml PE=1 SV=1|Protein PML OS=Mus musculus GN=Pml PE=1 SV=1|Protein PML OS=Mus musculus GN=Pml PE=1 SV=3	7.10453	0.378432	1.29993		25.1976	6.94817	0.000690926	0.00596411	-0.28173	0.0568589	0.463527	1	0.000690926	0.00596411
Phip	F8VQ93|Q8VDD9	F8VQ93	PH-interacting protein OS=Mus musculus GN=Phip PE=1 SV=1|PH-interacting protein OS=Mus musculus GN=Phip PE=1 SV=2	7.32019	0.378273	1.29978		26.5242	6.83251	0.000750427	0.00620168	-0.375706	0.0611105	0.481499	1	0.000750427	0.00620168
Als2cl	Q60I26	Q60I26	ALS2 C-terminal-like protein OS=Mus musculus GN=Als2cl PE=1 SV=1	7.04495	0.377685	1.29926		24.3989	6.17736	0.00122576	0.00805815	-0.934277	0.0904312	0.578804	1	0.00122576	0.00805815
Manf	F6T4L3|F6USD5|Q3TMX5|Q80ZP8|Q9CXI5	F6T4L3	Mesencephalic astrocyte-derived neurotrophic factor (Fragment) OS=Mus musculus GN=Manf PE=1 SV=1|Mesencephalic astrocyte-derived neurotrophic factor (Fragment) OS=Mus musculus GN=Manf PE=1 SV=1|Arginine-rich, mutated in early stage tumors, isoform CRA_b OS=Mus musculus GN=Manf PE=1 SV=1|Armet protein OS=Mus musculus GN=Manf PE=1 SV=1|Mesencephalic astrocyte-derived neurotrophic factor OS=Mus musc…	6.96992	0.377193	1.29881		24.9338	2.88009	0.0316351	0.0700087	-4.59001	0.429884	0.867242	1	0.0316351	0.0700087
Abcb1b	B2RUR3|P06795	B2RUR3	ATP-binding cassette, sub-family B (MDR/TAP), member 1B OS=Mus musculus GN=Abcb1b PE=1 SV=1|Multidrug resistance protein 1B OS=Mus musculus GN=Abcb1b PE=1 SV=1	7.69056	0.377149	1.29877		26.2359	5.62365	0.00191816	0.0103565	-1.44414	0.123228	0.651881	1	0.00191816	0.0103565
Fam160a2	F8WHJ1|J3QP99|Q3U2I3|Q3U2I3-2|Q3U2I3-3	F8WHJ1	FTS and Hook-interacting protein OS=Mus musculus GN=Fam160a2 PE=1 SV=1|FTS and Hook-interacting protein OS=Mus musculus GN=Fam160a2 PE=1 SV=1|FTS and Hook-interacting protein OS=Mus musculus GN=Fam160a2 PE=1 SV=2|Isoform 2 of FTS and Hook-interacting protein OS=Mus musculus GN=Fam160a2|Isoform 3 of FTS and Hook-interacting protein OS=Mus musculus GN=Fam160a2	6.58013	0.376791	1.29845		23.0935	6.06908	0.00133458	0.00847663	-1.03114	0.0962228	0.59386	1	0.00133458	0.00847663
Tlk1	Q8C0V0	Q8C0V0	Serine/threonine-protein kinase tousled-like 1 OS=Mus musculus GN=Tlk1 PE=1 SV=2	6.48113	0.375973	1.29771		23.0466	5.95953	0.00145628	0.00889046	-1.13051	0.10238	0.608728	1	0.00145628	0.00889046
Fam111a	Q9D2L9	Q9D2L9	Protein FAM111A OS=Mus musculus GN=Fam111a PE=2 SV=1	6.89503	0.375554	1.29734		22.3617	2.79951	0.0349359	0.0749196	-4.69804	0.442899	0.870639	1	0.0349359	0.0749196
Mllt3	A2AM29	A2AM29	Protein AF-9 OS=Mus musculus GN=Mllt3 PE=1 SV=1	6.49594	0.375539	1.29732		23.6863	2.1192	0.0834921	0.143207	-5.62524	0.561346	0.895071	1	0.0834921	0.143207
Trim24	Q64127|Q64127-2	Q64127	Transcription intermediary factor 1-alpha OS=Mus musculus GN=Trim24 PE=1 SV=1|Isoform Short of Transcription intermediary factor 1-alpha OS=Mus musculus GN=Trim24	7.13002	0.375293	1.2971		25.3888	6.14155	0.00126057	0.00819439	-0.966165	0.0923148	0.583822	1	0.00126057	0.00819439
Letm1	Q9Z2I0	Q9Z2I0	LETM1 and EF-hand domain-containing protein 1, mitochondrial OS=Mus musculus GN=Letm1 PE=1 SV=1	7.95902	0.374981	1.29682		26.3587	4.92132	0.00355843	0.0152452	-2.14667	0.17738	0.729399	1	0.00355843	0.0152452
Ift122	E9Q9G8|Q6NWV3|Q6NWV3-2	E9Q9G8	Intraflagellar transport protein 122 homolog OS=Mus musculus GN=Ift122 PE=1 SV=2|Intraflagellar transport protein 122 homolog OS=Mus musculus GN=Ift122 PE=1 SV=1|Isoform 2 of Intraflagellar transport protein 122 homolog OS=Mus musculus GN=Ift122	6.03528	0.374938	1.29678		22.3055	5.26725	0.00260521	0.012589	-1.79244	0.148829	0.693403	1	0.00260521	0.012589
Tpm3	E9Q7Q3|P21107-2	E9Q7Q3	Tropomyosin alpha-3 chain OS=Mus musculus GN=Tpm3 PE=1 SV=1|Isoform 2 of Tropomyosin alpha-3 chain OS=Mus musculus GN=Tpm3	8.47479	0.374058	1.29599		27.2243	5.20936	0.00274192	0.0129379	-1.85058	0.153346	0.699722	1	0.00274192	0.0129379
Ubn2	Q80WC1|Q80WC1-2|Q80WC1-3|Q80WC1-4	Q80WC1	Ubinuclein-2 OS=Mus musculus GN=Ubn2 PE=1 SV=2|Isoform 2 of Ubinuclein-2 OS=Mus musculus GN=Ubn2|Isoform 3 of Ubinuclein-2 OS=Mus musculus GN=Ubn2|Isoform 4 of Ubinuclein-2 OS=Mus musculus GN=Ubn2	7.08942	0.373735	1.2957		24.8974	3.59238	0.0137351	0.0381799	-3.6688	0.32481	0.831531	1	0.0137351	0.0381799
H6pd	A2A7A7|Q8CFX1	A2A7A7	GDH/6PGL endoplasmic bifunctional protein OS=Mus musculus GN=H6pd PE=1 SV=1|GDH/6PGL endoplasmic bifunctional protein OS=Mus musculus GN=H6pd PE=1 SV=2	7.40153	0.373395	1.2954		24.5795	4.75708	0.00414837	0.0167433	-2.32068	0.192285	0.745026	1	0.00414837	0.0167433
Klhl26	E9Q4C1|Q8BGY4|Q8BGY4-2|Q8BGY4-3	E9Q4C1	Kelch-like protein 26 OS=Mus musculus GN=Klhl26 PE=1 SV=1|Kelch-like protein 26 OS=Mus musculus GN=Klhl26 PE=1 SV=1|Isoform 2 of Kelch-like protein 26 OS=Mus musculus GN=Klhl26|Isoform 3 of Kelch-like protein 26 OS=Mus musculus GN=Klhl26	6.32705	0.37314	1.29517		22.3476	5.99948	0.00141046	0.00874749	-1.09411	0.100099	0.603349	1	0.00141046	0.00874749
Sash1	F8VQK5|P59808	F8VQK5	SAM and SH3 domain-containing protein 1 OS=Mus musculus GN=Sash1 PE=1 SV=1|SAM and SH3 domain-containing protein 1 OS=Mus musculus GN=Sash1 PE=1 SV=1	6.73556	0.373086	1.29512		25.221	6.03447	0.00137171	0.00858127	-1.06238	0.0981353	0.598597	1	0.00137171	0.00858127
Glb1	P23780|Q3TAW7	P23780	Beta-galactosidase OS=Mus musculus GN=Glb1 PE=1 SV=1|Beta-galactosidase OS=Mus musculus GN=Glb1 PE=1 SV=1	6.56185	0.372569	1.29466		25.5086	5.50656	0.00211769	0.0109033	-1.55677	0.13123	0.666018	1	0.00211769	0.0109033
Zfp777	B9EKF4|G5E8L5	B9EKF4	Protein Zfp777 OS=Mus musculus GN=Zfp777 PE=2 SV=1|MCG140820 OS=Mus musculus GN=Zfp777 PE=4 SV=1	6.43004	0.37089	1.29315		22.3423	4.64889	0.00459845	0.0179075	-2.43742	0.202594	0.754819	1	0.00459845	0.0179075
Vwa5a	Q99KC8	Q99KC8	von Willebrand factor A domain-containing protein 5A OS=Mus musculus GN=Vwa5a PE=1 SV=2	7.91387	0.370859	1.29312		26.8091	5.02076	0.00324836	0.01435	-2.04316	0.168785	0.719484	1	0.00324836	0.01435
Sdhaf4	Q8BTE0	Q8BTE0	Succinate dehydrogenase assembly factor 4, mitochondrial OS=Mus musculus GN=Sdhaf4 PE=3 SV=2	6.30042	0.370442	1.29275		22.1276	1.48563	0.193275	0.275921	-6.46176	0.683869	0.91222	1	0.193275	0.275921
Ttc13	E9Q723	E9Q723	Protein Ttc13 OS=Mus musculus GN=Ttc13 PE=1 SV=1	7.06139	0.369835	1.29221		24.7465	3.74529	0.0116021	0.034057	-3.48021	0.304642	0.822359	1	0.0116021	0.034057
Ptbp3	Q8BHD7	Q8BHD7	Polypyrimidine tract-binding protein 3 OS=Mus musculus GN=Ptbp3 PE=1 SV=1	8.06135	0.3698	1.29217		24.9318	5.31228	0.0025043	0.012282	-1.74752	0.145387	0.688405	1	0.0025043	0.012282
Cabin1	G3X8Q1	G3X8Q1	Calcineurin binding protein 1, isoform CRA_a OS=Mus musculus GN=Cabin1 PE=1 SV=1	6.44218	0.369751	1.29213		23.9016	4.9105	0.00359419	0.0152899	-2.15802	0.178335	0.730457	1	0.00359419	0.0152899
Fam76b	Q80XP8	Q80XP8	Protein FAM76B OS=Mus musculus GN=Fam76b PE=1 SV=1	7.21409	0.369578	1.29197		25.6056	6.0617	0.0013424	0.00851697	-1.03779	0.0966279	0.594872	1	0.0013424	0.00851697
Plekha1	Q8BUL6	Q8BUL6	Pleckstrin homology domain-containing family A member 1 OS=Mus musculus GN=Plekha1 PE=1 SV=1	6.90369	0.369404	1.29182		24.0468	4.71001	0.00433767	0.0171928	-2.37127	0.196722	0.749335	1	0.00433767	0.0171928
Pi4ka	E9Q3L2	E9Q3L2	Phosphatidylinositol 4-kinase alpha OS=Mus musculus GN=Pi4ka PE=1 SV=2	6.78093	0.368803	1.29128		25.6488	5.65043	0.00187565	0.0101932	-1.41863	0.121453	0.648581	1	0.00187565	0.0101932
Spc24	Q9D083|Q9D083-2|Q9D083-3	Q9D083	Kinetochore protein Spc24 OS=Mus musculus GN=Spc24 PE=1 SV=1|Isoform 2 of Kinetochore protein Spc24 OS=Mus musculus GN=Spc24|Isoform 3 of Kinetochore protein Spc24 OS=Mus musculus GN=Spc24	6.70224	0.368694	1.29118		22.8866	5.05871	0.00313833	0.0140886	-2.00402	0.165588	0.715608	1	0.00313833	0.0140886
Ddrgk1	Q80WW9	Q80WW9	DDRGK domain-containing protein 1 OS=Mus musculus GN=Ddrgk1 PE=1 SV=2	7.13249	0.368291	1.29082		23.9015	5.97557	0.00143768	0.00882323	-1.11587	0.10146	0.606575	1	0.00143768	0.00882323
Rnf220	Q6PDX6|Q6PDX6-2|Q6PDX6-4|Q9D4L6	Q6PDX6	E3 ubiquitin-protein ligase Rnf220 OS=Mus musculus GN=Rnf220 PE=1 SV=1|Isoform 2 of E3 ubiquitin-protein ligase Rnf220 OS=Mus musculus GN=Rnf220|Isoform 4 of E3 ubiquitin-protein ligase Rnf220 OS=Mus musculus GN=Rnf220|E3 ubiquitin-protein ligase Rnf220 OS=Mus musculus GN=Rnf220 PE=1 SV=2	6.42556	0.368262	1.2908		22.6933	4.01365	0.00870336	0.027846	-3.15769	0.271295	0.804787	1	0.00870336	0.027846
Rbpms	Q9WVB0|Q9WVB0-2|T1ECW4	Q9WVB0	RNA-binding protein with multiple splicing OS=Mus musculus GN=Rbpms PE=1 SV=2|Isoform 2 of RNA-binding protein with multiple splicing OS=Mus musculus GN=Rbpms|RNA-binding protein with multiple-splicing OS=Mus musculus GN=Rbpms PE=1 SV=1	6.99726	0.367847	1.29043		23.1947	5.62207	0.00192071	0.0103565	-1.44566	0.123334	0.652076	1	0.00192071	0.0103565
Nit2	Q9JHW2	Q9JHW2	Omega-amidase NIT2 OS=Mus musculus GN=Nit2 PE=1 SV=1	7.45301	0.367219	1.28986		24.6155	5.42401	0.00227286	0.0114787	-1.63722	0.137109	0.675694	1	0.00227286	0.0114787
Sh3bgrl	Q9JJU8	Q9JJU8	SH3 domain-binding glutamic acid-rich-like protein OS=Mus musculus GN=Sh3bgrl PE=1 SV=1	7.84209	0.367202	1.28985		25.7231	6.52017	0.00094351	0.00699279	-0.636293	0.0739236	0.529045	1	0.00094351	0.00699279
Apeh	A0A0R4J107|Q8R146|Q8R146-2	Q8R146	Acylamino-acid-releasing enzyme (Fragment) OS=Mus musculus GN=Apeh PE=1 SV=1|Acylamino-acid-releasing enzyme OS=Mus musculus GN=Apeh PE=1 SV=3|Isoform 2 of Acylamino-acid-releasing enzyme OS=Mus musculus GN=Apeh	6.8115	0.366945	1.28962		24.4485	6.90535	0.000712287	0.00602338	-0.316365	0.0584032	0.470197	1	0.000712287	0.00602338
Rps6kc1	E9QMX4|Q8BLK9	E9QMX4	Ribosomal protein S6 kinase delta-1 OS=Mus musculus GN=Rps6kc1 PE=1 SV=1|Ribosomal protein S6 kinase delta-1 OS=Mus musculus GN=Rps6kc1 PE=1 SV=2	6.39373	0.366735	1.28943		23.1297	6.81919	0.000757659	0.00622348	-0.386619	0.0616169	0.483559	1	0.000757659	0.00622348
Prc1	G3UWQ7	G3UWQ7	Protein regulator of cytokinesis 1 OS=Mus musculus GN=Prc1 PE=1 SV=1	7.16393	0.366607	1.28932		25.9236	5.04702	0.00317177	0.0141622	-2.01606	0.166568	0.716808	1	0.00317177	0.0141622
Vps8	D3YUP0|F8WI64|Q0P5W1|Q0P5W1-3	D3YUP0	Vacuolar protein sorting-associated protein 8 homolog OS=Mus musculus GN=Vps8 PE=1 SV=1|Vacuolar protein sorting-associated protein 8 homolog OS=Mus musculus GN=Vps8 PE=1 SV=2|Vacuolar protein sorting-associated protein 8 homolog OS=Mus musculus GN=Vps8 PE=1 SV=1|Isoform 3 of Vacuolar protein sorting-associated protein 8 homolog OS=Mus musculus GN=Vps8	6.51427	0.366428	1.28916		24.0067	6.30109	0.00111382	0.00764949	-0.825232	0.0841605	0.561192	1	0.00111382	0.00764949
Topors	Q80Z37	Q80Z37	E3 ubiquitin-protein ligase Topors OS=Mus musculus GN=Topors PE=1 SV=1	6.41828	0.366235	1.28898		23.3238	6.38392	0.00104553	0.00751903	-0.753187	0.080163	0.549175	1	0.00104553	0.00751903
Drap1	D3YY09|D3YYC2|F6T9K1|G3UXH5|Q4FJW2|Q9D6N5	D3YY09	Dr1-associated corepressor OS=Mus musculus GN=Drap1 PE=1 SV=1|Dr1-associated corepressor OS=Mus musculus GN=Drap1 PE=1 SV=1|Dr1-associated corepressor OS=Mus musculus GN=Drap1 PE=1 SV=2|Dr1-associated corepressor OS=Mus musculus GN=Drap1 PE=1 SV=1|Dr1 associated protein 1 (Negative cofactor 2 alpha), isoform CRA_d OS=Mus musculus GN=Drap1 PE=1 SV=1|Dr1-associated corepressor OS=Mus musculus GN=Dr…	6.60013	0.365853	1.28864		21.2322	1.89472	0.11235	0.181772	-5.92947	0.603541	0.901685	1	0.11235	0.181772
Prkra	Q9WTX2	Q9WTX2	Interferon-inducible double-stranded RNA-dependent protein kinase activator A OS=Mus musculus GN=Prkra PE=1 SV=1	6.86246	0.36583	1.28862		24.5494	2.61033	0.0442632	0.0894177	-4.95392	0.474329	0.878166	1	0.0442632	0.0894177
Erf	A0A0R4J0I0|P70459	P70459	ETS domain-containing transcription factor ERF OS=Mus musculus GN=Erf PE=1 SV=1|ETS domain-containing transcription factor ERF OS=Mus musculus GN=Erf PE=1 SV=1	6.56621	0.365751	1.28855		23.3856	4.62728	0.00469496	0.0181603	-2.46094	0.204701	0.756729	1	0.00469496	0.0181603
Nufip1	Q9QXX8	Q9QXX8	Nuclear fragile X mental retardation-interacting protein 1 OS=Mus musculus GN=Nufip1 PE=1 SV=1	5.84627	0.364157	1.28713		23.1464	3.8298	0.0105853	0.0319924	-3.37748	0.29386	0.817034	1	0.0105853	0.0319924
Ncoa2	E9PV80|Q61026	E9PV80	Nuclear receptor coactivator 2 OS=Mus musculus GN=Ncoa2 PE=1 SV=1|Nuclear receptor coactivator 2 OS=Mus musculus GN=Ncoa2 PE=1 SV=3	7.13162	0.363918	1.28692		25.0439	4.85709	0.00377685	0.0157857	-2.21427	0.183104	0.735621	1	0.00377685	0.0157857
Glipr2	Q9CYL5	Q9CYL5	Golgi-associated plant pathogenesis-related protein 1 OS=Mus musculus GN=Glipr2 PE=1 SV=3	6.86786	0.363789	1.2868		23.8626	5.76704	0.00170278	0.00972438	-1.30856	0.113955	0.633922	1	0.00170278	0.00972438
Hdac10	Q6P3E7	Q6P3E7	Histone deacetylase 10 OS=Mus musculus GN=Hdac10 PE=2 SV=2	6.24911	0.363588	1.28662		21.3512	6.20528	0.0011994	0.007975	-0.909525	0.0889846	0.574868	1	0.0011994	0.007975
Chek1	G3UYB1|O35280	O35280	Serine/threonine-protein kinase Chk1 OS=Mus musculus GN=Chek1 PE=1 SV=1|Serine/threonine-protein kinase Chk1 OS=Mus musculus GN=Chek1 PE=1 SV=2	6.81035	0.363364	1.28642		24.6864	4.18385	0.00729389	0.0246786	-2.95878	0.251492	0.792603	1	0.00729389	0.0246786
Setdb2	B2RXP3	B2RXP3	Histone-lysine N-methyltransferase SETDB2 OS=Mus musculus GN=Setdb2 PE=1 SV=1	6.70101	0.363149	1.28623		25.0903	4.93653	0.00350887	0.0150884	-2.13075	0.176045	0.727905	1	0.00350887	0.0150884
Erlin1	A0A0R4J1G5|Q91X78	Q91X78	Erlin-1 OS=Mus musculus GN=Erlin1 PE=1 SV=1|Erlin-1 OS=Mus musculus GN=Erlin1 PE=1 SV=1	7.33171	0.363108	1.28619		23.7736	3.37202	0.0176302	0.0462245	-3.94656	0.35537	0.843755	1	0.0176302	0.0462245
Cpox	P36552	P36552	Oxygen-dependent coproporphyrinogen-III oxidase, mitochondrial OS=Mus musculus GN=Cpox PE=1 SV=2	7.62326	0.362736	1.28586		25.392	5.83195	0.00161461	0.0094315	-1.24803	0.109942	0.625563	1	0.00161461	0.0094315
Aen	Q9CZI9|Q9CZI9-2	Q9CZI9	Apoptosis-enhancing nuclease OS=Mus musculus GN=Aen PE=2 SV=1|Isoform 2 of Apoptosis-enhancing nuclease OS=Mus musculus GN=Aen	6.68265	0.36259	1.28573		23.3533	2.60758	0.0444169	0.0896482	-4.95765	0.474793	0.878271	1	0.0444169	0.0896482
Trpm7	A2AI57|Q923J1	A2AI57	Transient receptor potential cation channel subfamily M member 7 OS=Mus musculus GN=Trpm7 PE=1 SV=1|Transient receptor potential cation channel subfamily M member 7 OS=Mus musculus GN=Trpm7 PE=1 SV=1	6.62062	0.362326	1.2855		24.8935	6.71764	0.00081553	0.00641183	-0.470374	0.0655908	0.499178	1	0.00081553	0.00641183
Hspa12a	Q8K0U4	Q8K0U4	Heat shock 70 kDa protein 12A OS=Mus musculus GN=Hspa12a PE=1 SV=1	7.13228	0.362053	1.28525		25.2425	4.71417	0.00432055	0.0171928	-2.36678	0.196327	0.748957	1	0.00432055	0.0171928
Rhox5	P52651|Q3UJH4|V9GXJ4	P52651	Homeobox protein Rhox5 OS=Mus musculus GN=Rhox5 PE=2 SV=1|Homeobox protein Rhox5 OS=Mus musculus GN=Rhox5 PE=1 SV=1|Homeobox protein Rhox5 (Fragment) OS=Mus musculus GN=Rhox5 PE=1 SV=1	7.52356	0.361901	1.28512		25.6731	4.66878	0.00451167	0.0176784	-2.41583	0.20067	0.753048	1	0.00451167	0.0176784
Manea	Q6NXH2	Q6NXH2	Glycoprotein endo-alpha-1,2-mannosidase OS=Mus musculus GN=Manea PE=2 SV=1	6.70992	0.361405	1.28468		22.5898	2.72276	0.0384332	0.0801231	-4.80151	0.455504	0.873767	1	0.0384332	0.0801231
Pitpnc1	Q8K4R4-2	Q8K4R4	Isoform 2 of Cytoplasmic phosphatidylinositol transfer protein 1 OS=Mus musculus GN=Pitpnc1	6.51253	0.361271	1.28456		22.7209	3.50751	0.0151077	0.0411307	-3.77495	0.336371	0.836374	1	0.0151077	0.0411307
Fam60a	A0A0N4SW48|D3Z0C1|Q8C8M1	D3Z0C1	Protein FAM60A OS=Mus musculus GN=Fam60a PE=1 SV=1|Protein FAM60A (Fragment) OS=Mus musculus GN=Fam60a PE=1 SV=1|Protein FAM60A OS=Mus musculus GN=Fam60a PE=1 SV=1	6.51327	0.361097	1.2844		24.0446	2.92551	0.0299262	0.067434	-4.52939	0.422645	0.865275	1	0.0299262	0.067434
Lgals7	Q9CRB1	Q9CRB1	Galectin OS=Mus musculus GN=Lgals7 PE=1 SV=1	8.69822	0.360989	1.28431		25.9294	5.38966	0.00234127	0.0116823	-1.67096	0.139614	0.67965	1	0.00234127	0.0116823
Bub1	A2APR8|O08901	A2APR8	Mitotic checkpoint serine/threonine-protein kinase BUB1 OS=Mus musculus GN=Bub1 PE=1 SV=1|Mitotic checkpoint serine/threonine-protein kinase BUB1 OS=Mus musculus GN=Bub1 PE=1 SV=1	6.85372	0.360761	1.2841		24.5258	2.01925	0.0952591	0.159349	-5.76129	0.579957	0.898095	1	0.0952591	0.159349
Endod1	Q8C522	Q8C522	Endonuclease domain-containing 1 protein OS=Mus musculus GN=Endod1 PE=1 SV=2	6.94441	0.35992	1.28335		23.9643	5.10798	0.00300181	0.0136762	-1.9535	0.161506	0.710501	1	0.00300181	0.0136762
Akr1c13	Q8VC28	Q8VC28	Aldo-keto reductase family 1 member C13 OS=Mus musculus GN=Akr1c13 PE=1 SV=2	7.15506	0.359673	1.28314		24.6045	6.25767	0.0011517	0.00775529	-0.863309	0.08632	0.567422	1	0.0011517	0.00775529
Anxa8	O35640|Q921D0	O35640	Annexin A8 OS=Mus musculus GN=Anxa8 PE=1 SV=2|Annexin OS=Mus musculus GN=Anxa8 PE=1 SV=1	6.6661	0.359371	1.28287		23.4416	1.43379	0.206902	0.291749	-6.52582	0.694333	0.913428	1	0.206902	0.291749
Pnkp	G5E8N7|Q9JLV6|Q9JLV6-2	G5E8N7	Bifunctional polynucleotide phosphatase/kinase OS=Mus musculus GN=Pnkp PE=1 SV=1|Bifunctional polynucleotide phosphatase/kinase OS=Mus musculus GN=Pnkp PE=1 SV=2|Isoform 2 of Bifunctional polynucleotide phosphatase/kinase OS=Mus musculus GN=Pnkp	7.03525	0.359296	1.2828		24.6729	5.42099	0.00227878	0.0114905	-1.64018	0.137328	0.676044	1	0.00227878	0.0114905
Mrpl40	D3Z7C0|Q3UKS6|Q9Z2Q5	D3Z7C0	39S ribosomal protein L40, mitochondrial OS=Mus musculus GN=Mrpl40 PE=1 SV=1|39S ribosomal protein L40, mitochondrial OS=Mus musculus GN=Mrpl40 PE=1 SV=1|39S ribosomal protein L40, mitochondrial OS=Mus musculus GN=Mrpl40 PE=1 SV=2	6.64989	0.358812	1.28237		21.8926	2.33307	0.0631346	0.115983	-5.33263	0.522523	0.888147	1	0.0631346	0.115983
Sulf2	Q8CFG0	Q8CFG0	Extracellular sulfatase Sulf-2 OS=Mus musculus GN=Sulf2 PE=2 SV=2	6.90712	0.358679	1.28225		24.1901	2.57731	0.0461524	0.0921148	-4.99884	0.479937	0.879418	1	0.0461524	0.0921148
Q3TYS2	Q3TYS2	Q3TYS2	Uncharacterized protein C17orf62 homolog OS=Mus musculus PE=1 SV=2	7.26364	0.358378	1.28198		24.9109	4.95788	0.00344062	0.0148829	-2.10845	0.174183	0.725793	1	0.00344062	0.0148829
Rad54l	P70270	P70270	DNA repair and recombination protein RAD54-like OS=Mus musculus GN=Rad54l PE=1 SV=2	6.23487	0.35794	1.28159		22.7781	3.08326	0.0247368	0.0588144	-4.32066	0.398068	0.858137	1	0.0247368	0.0588144
Acbd6	Q9D061	Q9D061	Acyl-CoA-binding domain-containing protein 6 OS=Mus musculus GN=Acbd6 PE=1 SV=2	6.53525	0.357848	1.28151		23.1091	3.53288	0.0146819	0.0402542	-3.74312	0.332889	0.834945	1	0.0146819	0.0402542
Ripk1	Q60855	Q60855	Receptor-interacting serine/threonine-protein kinase 1 OS=Mus musculus GN=Ripk1 PE=1 SV=1	7.29935	0.357405	1.28112		25.6702	6.17221	0.0012307	0.00807697	-0.938859	0.0907004	0.579529	1	0.0012307	0.00807697
Adh4	Q9QYY9	Q9QYY9	Alcohol dehydrogenase 4 OS=Mus musculus GN=Adh4 PE=1 SV=4	7.21417	0.356877	1.28065		24.7108	4.01283	0.00871085	0.027846	-3.15866	0.271393	0.804843	1	0.00871085	0.027846
Znf512	Q69Z99	Q69Z99	Zinc finger protein 512 OS=Mus musculus GN=Znf512 PE=2 SV=2	7.53881	0.356402	1.28023		25.8923	6.34674	0.00107556	0.00760344	-0.785433	0.0819379	0.554591	1	0.00107556	0.00760344
Lztfl1	F6VG18|Q9JHQ5	F6VG18	Leucine zipper transcription factor-like protein 1 (Fragment) OS=Mus musculus GN=Lztfl1 PE=1 SV=1|Leucine zipper transcription factor-like protein 1 OS=Mus musculus GN=Lztfl1 PE=1 SV=1	6.36596	0.356271	1.28011		22.6953	3.62227	0.0132856	0.0374242	-3.63167	0.320802	0.829785	1	0.0132856	0.0374242
Etnk1	A0A0N4SV10|A0A0N4SVC4|Q9D4V0	Q9D4V0	Ethanolamine kinase 1 OS=Mus musculus GN=Etnk1 PE=1 SV=1|Ethanolamine kinase 1 OS=Mus musculus GN=Etnk1 PE=1 SV=1|Ethanolamine kinase 1 OS=Mus musculus GN=Etnk1 PE=1 SV=2	6.89492	0.356203	1.28005		24.7321	2.39784	0.0580619	0.108829	-5.24395	0.511044	0.885921	1	0.0580619	0.108829
Sdhb	Q9CQA3	Q9CQA3	Succinate dehydrogenase [ubiquinone] iron-sulfur subunit, mitochondrial OS=Mus musculus GN=Sdhb PE=1 SV=1	7.27067	0.355095	1.27907		25.6799	4.71326	0.0043243	0.0171928	-2.36777	0.196414	0.74904	1	0.0043243	0.0171928
Uckl1	Q91YL3	Q91YL3	Uridine-cytidine kinase-like 1 OS=Mus musculus GN=Uckl1 PE=1 SV=1	7.05202	0.354788	1.2788		24.1925	6.6424	0.000861749	0.00662306	-0.533114	0.0686696	0.510644	1	0.000861749	0.00662306
Ccdc51	Q3URS9|Q3URS9-2	Q3URS9	Coiled-coil domain-containing protein 51 OS=Mus musculus GN=Ccdc51 PE=1 SV=1|Isoform 2 of Coiled-coil domain-containing protein 51 OS=Mus musculus GN=Ccdc51	6.86873	0.354671	1.27869		23.9621	4.55549	0.00503259	0.0190251	-2.53957	0.211814	0.762961	1	0.00503259	0.0190251
Llph	D3YXW1|Q9D945	Q9D945	Protein LLP homolog (Fragment) OS=Mus musculus GN=Llph PE=1 SV=1|Protein LLP homolog OS=Mus musculus GN=Llph PE=1 SV=1	7.11217	0.35371	1.27784		22.9225	3.80985	0.0108159	0.0324533	-3.40163	0.296381	0.818308	1	0.0108159	0.0324533
Numa1	E9Q7G0|F6ZQA3	E9Q7G0	Protein Numa1 OS=Mus musculus GN=Numa1 PE=1 SV=1|Protein Numa1 (Fragment) OS=Mus musculus GN=Numa1 PE=1 SV=1	8.20273	0.353625	1.27777		29.4354	6.13991	0.00126219	0.00819579	-0.967631	0.092402	0.584051	1	0.00126219	0.00819579
Fnta	Q541Z2|Q61239	Q541Z2	Protein farnesyltransferase/geranylgeranyltransferase type-1 subunit alpha OS=Mus musculus GN=Fnta PE=1 SV=1|Protein farnesyltransferase/geranylgeranyltransferase type-1 subunit alpha OS=Mus musculus GN=Fnta PE=1 SV=1	6.77633	0.353212	1.2774		24.2786	5.95653	0.00145979	0.00889572	-1.13325	0.102553	0.609131	1	0.00145979	0.00889572
Ube3c	Q80U95	Q80U95	Ubiquitin-protein ligase E3C OS=Mus musculus GN=Ube3c PE=1 SV=2	7.75068	0.352766	1.27701		27.0495	6.30496	0.00111052	0.00764949	-0.821852	0.0839703	0.560635	1	0.00111052	0.00764949
Zc3h7a	E9PWW6	E9PWW6	Protein Zc3h7a OS=Mus musculus GN=Zc3h7a PE=1 SV=1	6.79317	0.352712	1.27696		24.5214	3.17828	0.0220962	0.0542393	-4.19636	0.383688	0.853598	1	0.0220962	0.0542393
Fam192a	Q91WE2	Q91WE2	Protein FAM192A OS=Mus musculus GN=Fam192a PE=1 SV=1	7.06613	0.352559	1.27682		26.2558	5.00186	0.00330483	0.0145004	-2.06274	0.170394	0.721395	1	0.00330483	0.0145004
Dnajc10	Q9DC23	Q9DC23	DnaJ homolog subfamily C member 10 OS=Mus musculus GN=Dnajc10 PE=1 SV=2	7.70815	0.352235	1.27654		26.6575	3.31399	0.0188522	0.0483182	-4.02086	0.363711	0.846789	1	0.0188522	0.0483182
Dnajb1	Q3TU79|Q9QYJ3	Q3TU79	DnaJ (Hsp40) homolog, subfamily B, member 1 OS=Mus musculus GN=Dnajb1 PE=1 SV=1|DnaJ homolog subfamily B member 1 OS=Mus musculus GN=Dnajb1 PE=1 SV=3	7.72142	0.351149	1.27558		26.3779	5.03868	0.00319585	0.0141935	-2.02465	0.167269	0.71766	1	0.00319585	0.0141935
Casc5	A3KGI3|Q66JQ7	A3KGI3	Protein CASC5 OS=Mus musculus GN=Casc5 PE=1 SV=1|Protein CASC5 OS=Mus musculus GN=Casc5 PE=1 SV=3	6.09534	0.350884	1.27534		22.1104	2.05556	0.0907973	0.153474	-5.71195	0.573163	0.897011	1	0.0907973	0.153474
Ric1	E9QPA1	E9QPA1	RAB6A-GEF complex partner protein 1 OS=Mus musculus GN=Ric1 PE=1 SV=1	6.7693	0.350685	1.27517		24.6059	6.61418	0.000879869	0.00673563	-0.556798	0.0698546	0.514919	1	0.000879869	0.00673563
Myo6	E9PVU0|E9Q175	E9PVU0	Unconventional myosin-VI OS=Mus musculus GN=Myo6 PE=1 SV=1|Unconventional myosin-VI OS=Mus musculus GN=Myo6 PE=1 SV=1	7.72908	0.350662	1.27515		27.3453	5.03602	0.00320359	0.0141953	-2.0274	0.167494	0.717931	1	0.00320359	0.0141953
Clspn	Q80YR7	Q80YR7	Claspin OS=Mus musculus GN=Clspn PE=1 SV=2	6.57832	0.350393	1.27491		24.4668	2.95707	0.0287986	0.0654749	-4.4874	0.417657	0.863885	1	0.0287986	0.0654749
Spast	Q9QYY8|Q9QYY8-2	Q9QYY8	Spastin OS=Mus musculus GN=Spast PE=1 SV=3|Isoform 2 of Spastin OS=Mus musculus GN=Spast	6.67637	0.350087	1.27464		23.9776	6.38799	0.0010423	0.00750507	-0.749663	0.0799704	0.54858	1	0.0010423	0.00750507
Ndufaf4	A2AJX3|Q9D1H6	A2AJX3	NADH dehydrogenase [ubiquinone] 1 alpha subcomplex assembly factor 4 (Fragment) OS=Mus musculus GN=Ndufaf4 PE=1 SV=1|NADH dehydrogenase [ubiquinone] 1 alpha subcomplex assembly factor 4 OS=Mus musculus GN=Ndufaf4 PE=1 SV=1	7.05698	0.34961	1.27422		23.5624	3.84725	0.0103881	0.0315767	-3.35639	0.291665	0.81591	1	0.0103881	0.0315767
Trmt2a	E9PUQ7|Q3UYU2	E9PUQ7	tRNA (uracil-5-)-methyltransferase homolog A OS=Mus musculus GN=Trmt2a PE=1 SV=1|HpaII tinys locus 9c, isoform CRA_a OS=Mus musculus GN=Trmt2a PE=1 SV=1	7.18751	0.349517	1.27413		25.5216	6.56564	0.000912079	0.00685591	-0.597724	0.0719318	0.522234	1	0.000912079	0.00685591
Rasa2	P58069	P58069	Ras GTPase-activating protein 2 OS=Mus musculus GN=Rasa2 PE=1 SV=2	6.96076	0.348207	1.27298		24.8235	5.88495	0.00154651	0.00916254	-1.19897	0.106748	0.618633	1	0.00154651	0.00916254
Nnt	Q61941	Q61941	NAD(P) transhydrogenase, mitochondrial OS=Mus musculus GN=Nnt PE=1 SV=2	7.83385	0.348048	1.27284		27.2013	3.39209	0.0172284	0.0454168	-3.92098	0.352514	0.842688	1	0.0172284	0.0454168
Znf593	Q9DB42	Q9DB42	Zinc finger protein 593 OS=Mus musculus GN=Znf593 PE=1 SV=2	6.52896	0.347225	1.27211		22.0471	1.26387	0.25809	0.346942	-6.72813	0.729035	0.917208	1	0.25809	0.346942
Tjap1	Q9DCD5	Q9DCD5	Tight junction-associated protein 1 OS=Mus musculus GN=Tjap1 PE=1 SV=1	6.87584	0.346981	1.2719		24.4175	5.98726	0.00142429	0.00875028	-1.10522	0.100792	0.605	1	0.00142429	0.00875028
Cic	Q924A2	Q924A2	Protein capicua homolog OS=Mus musculus GN=Cic PE=1 SV=2	6.66893	0.345591	1.27067		23.561	6.52538	0.000939848	0.00699279	-0.631866	0.0736932	0.528267	1	0.000939848	0.00699279
Atg3	Q9CPX6	Q9CPX6	Ubiquitin-like-conjugating enzyme ATG3 OS=Mus musculus GN=Atg3 PE=1 SV=1	7.52535	0.345505	1.2706		24.9008	5.39815	0.00232413	0.0116267	-1.6626	0.138991	0.678675	1	0.00232413	0.0116267
Bak1	O08734|Q91WX5	O08734	Bcl-2 homologous antagonist/killer OS=Mus musculus GN=Bak1 PE=1 SV=3|Bak1 protein OS=Mus musculus GN=Bak1 PE=1 SV=1	6.93428	0.345397	1.2705		23.0986	5.25094	0.00264293	0.0126869	-1.80878	0.150092	0.695196	1	0.00264293	0.0126869
Papd5	E9QJT6|F8WI26|Q68ED3	E9QJT6	Non-canonical poly(A) RNA polymerase PAPD5 OS=Mus musculus GN=Papd5 PE=1 SV=1|Non-canonical poly(A) RNA polymerase PAPD5 OS=Mus musculus GN=Papd5 PE=1 SV=1|Non-canonical poly(A) RNA polymerase PAPD5 OS=Mus musculus GN=Papd5 PE=1 SV=2	7.28365	0.345244	1.27037		24.0709	2.51735	0.0498098	0.0973441	-5.08058	0.490214	0.881647	1	0.0498098	0.0973441
Pcyox1	Q9CQF9	Q9CQF9	Prenylcysteine oxidase OS=Mus musculus GN=Pcyox1 PE=1 SV=1	8.00275	0.344918	1.27008		26.2909	4.16442	0.00744088	0.0250093	-2.98127	0.2537	0.794037	1	0.00744088	0.0250093
Dag1	Q544G5|Q62165	Q544G5	Dystroglycan OS=Mus musculus GN=Dag1 PE=1 SV=1|Dystroglycan OS=Mus musculus GN=Dag1 PE=1 SV=4	6.74115	0.344855	1.27002		23.102	5.6869	0.00181949	0.0100434	-1.38403	0.119068	0.644047	1	0.00181949	0.0100434
Atxn1	J3QPR1|P54254	J3QPR1	Ataxin-1 OS=Mus musculus GN=Atxn1 PE=1 SV=1|Ataxin-1 OS=Mus musculus GN=Atxn1 PE=1 SV=2	6.61827	0.344447	1.26966		23.2907	6.31322	0.00110351	0.00764949	-0.814639	0.0835655	0.559444	1	0.00110351	0.00764949
Anxa6	F8WIT2	F8WIT2	Annexin OS=Mus musculus GN=Anxa6 PE=1 SV=1	8.26556	0.344428	1.26965		28.0812	5.37458	0.00237206	0.0117925	-1.68581	0.140725	0.681373	1	0.00237206	0.0117925
Ercc5	E9QM61|P35689	E9QM61	DNA repair protein-complementing XP-G cells homolog OS=Mus musculus GN=Ercc5 PE=1 SV=1|DNA repair protein complementing XP-G cells homolog OS=Mus musculus GN=Ercc5 PE=1 SV=4	6.68175	0.344376	1.2696		24.3558	5.98982	0.00142139	0.00874749	-1.1029	0.100647	0.604655	1	0.00142139	0.00874749
Rhox2d	W4VSN9	W4VSN9	MCG125586 OS=Mus musculus GN=Rhox2d PE=1 SV=1	7.03781	0.34434	1.26957		24.1053	3.43788	0.0163495	0.0435736	-3.86282	0.346052	0.84022	1	0.0163495	0.0435736
Cep85	A2A9K3|Q8BMK0	A2A9K3	Centrosomal protein of 85 kDa OS=Mus musculus GN=Cep85 PE=1 SV=1|Centrosomal protein of 85 kDa OS=Mus musculus GN=Cep85 PE=1 SV=2	6.88125	0.344185	1.26943		24.8433	4.56526	0.00498502	0.0189414	-2.52882	0.210835	0.762123	1	0.00498502	0.0189414
Yap1	P46938	P46938	Transcriptional coactivator YAP1 OS=Mus musculus GN=Yap1 PE=1 SV=2	7.25252	0.343769	1.26907		24.4112	6.30267	0.00111247	0.00764949	-0.823852	0.0840828	0.560965	1	0.00111247	0.00764949
Ethe1	Q9DCM0	Q9DCM0	Persulfide dioxygenase ETHE1, mitochondrial OS=Mus musculus GN=Ethe1 PE=1 SV=2	7.68399	0.343388	1.26873		25.5088	2.41828	0.0565524	0.107034	-5.21597	0.507448	0.885205	1	0.0565524	0.107034
Iqgap3	F8VQ29	F8VQ29	Protein Iqgap3 OS=Mus musculus GN=Iqgap3 PE=1 SV=1	7.1181	0.343278	1.26864		24.459	1.96902	0.101808	0.167645	-5.82934	0.589418	0.899566	1	0.101808	0.167645
Dnm1l	Q8K1M6	Q8K1M6	Dynamin-1-like protein OS=Mus musculus GN=Dnm1l PE=1 SV=2	8.02938	0.342538	1.26799		27.7183	5.96221	0.00145315	0.00889005	-1.12806	0.102226	0.608369	1	0.00145315	0.00889005
Mef2d	E9Q5E0|Q63943|Q921S6	E9Q5E0	Myocyte-specific enhancer factor 2D OS=Mus musculus GN=Mef2d PE=1 SV=1|Myocyte-specific enhancer factor 2D OS=Mus musculus GN=Mef2d PE=1 SV=2|Myocyte enhancer factor 2D OS=Mus musculus GN=Mef2d PE=1 SV=1	6.31958	0.341911	1.26743		22.9482	2.41987	0.0564367	0.106884	-5.21379	0.507169	0.885149	1	0.0564367	0.106884
Erlec1	Q8VEH8	Q8VEH8	Endoplasmic reticulum lectin 1 OS=Mus musculus GN=Erlec1 PE=1 SV=1	7.0288	0.341179	1.26679		24.7711	5.75561	0.00171889	0.00979479	-1.31928	0.114673	0.63538	1	0.00171889	0.00979479
Adprh	P54923|Q3U5N4	P54923	[Protein ADP-ribosylarginine] hydrolase OS=Mus musculus GN=Adprh PE=1 SV=1|ADP-ribosylarginine hydrolase, isoform CRA_a OS=Mus musculus GN=Adprh PE=1 SV=1	7.29001	0.340926	1.26657		24.8722	6.37073	0.00105607	0.00757225	-0.764609	0.080789	0.551101	1	0.00105607	0.00757225
Galnt1	O08912	O08912	Polypeptide N-acetylgalactosaminyltransferase 1 OS=Mus musculus GN=Galnt1 PE=1 SV=1	7.06041	0.340575	1.26626		24.4188	5.51697	0.00209901	0.0108648	-1.54669	0.130503	0.664781	1	0.00209901	0.0108648
Gpx7	Q3TNK3|Q99LJ6	Q3TNK3	Glutathione peroxidase OS=Mus musculus GN=Gpx7 PE=1 SV=1|Glutathione peroxidase 7 OS=Mus musculus GN=Gpx7 PE=1 SV=1	6.6296	0.340168	1.2659		24.1535	4.62584	0.00470147	0.0181628	-2.46251	0.204842	0.756856	1	0.00470147	0.0181628
H2afv|H2afz	B2RVP5|P0C0S6|Q3THW5	B2RVP5	Histone H2A OS=Mus musculus GN=H2afv PE=1 SV=1|Histone H2A.Z OS=Mus musculus GN=H2afz PE=1 SV=2|Histone H2A.V OS=Mus musculus GN=H2afv PE=1 SV=3	6.5805	0.340148	1.26589		21.8862	3.15777	0.0226386	0.0551324	-4.22309	0.386765	0.854594	1	0.0226386	0.0551324
Slc25a46	Q9CQS4	Q9CQS4	Solute carrier family 25 member 46 OS=Mus musculus GN=Slc25a46 PE=1 SV=1	6.74183	0.340112	1.26585		23.6926	4.50157	0.0053045	0.0196821	-2.59911	0.217271	0.767531	1	0.0053045	0.0196821
Atp11c	E9QKK8|F6Q8D3|Q9QZW0|Q9QZW0-2	E9QKK8	Phospholipid-transporting ATPase OS=Mus musculus GN=Atp11c PE=1 SV=1|Phospholipid-transporting ATPase OS=Mus musculus GN=Atp11c PE=1 SV=1|Phospholipid-transporting ATPase 11C OS=Mus musculus GN=Atp11c PE=1 SV=2|Isoform 2 of Phospholipid-transporting ATPase 11C OS=Mus musculus GN=Atp11c	7.0966	0.340023	1.26578		25.3378	3.99602	0.00886636	0.0281882	-3.17855	0.273407	0.806002	1	0.00886636	0.0281882
Ccdc6	D3YZP9	D3YZP9	Coiled-coil domain-containing protein 6 OS=Mus musculus GN=Ccdc6 PE=1 SV=1	7.19854	0.339929	1.26569		25.045	4.60358	0.00480347	0.0184466	-2.48682	0.20703	0.758805	1	0.00480347	0.0184466
Zzz3	D3YTT9|Q6KAQ7	D3YTT9	ZZ-type zinc finger-containing protein 3 OS=Mus musculus GN=Zzz3 PE=1 SV=1|ZZ-type zinc finger-containing protein 3 OS=Mus musculus GN=Zzz3 PE=1 SV=2	6.26864	0.339896	1.26567		22.5225	3.12799	0.0234524	0.0564761	-4.262	0.391258	0.856023	1	0.0234524	0.0564761
Gm20696|Eif4e3	H3BJN7|Q9DBB5	H3BJN7	Protein Gm20696 OS=Mus musculus GN=Gm20696 PE=4 SV=1|Eukaryotic translation initiation factor 4E type 3 OS=Mus musculus GN=Eif4e3 PE=1 SV=1	6.21927	0.339807	1.26559		22.6402	4.68181	0.00445582	0.0175044	-2.40172	0.199416	0.751881	1	0.00445582	0.0175044
Swi5	A0A0A0MQ99	A0A0A0MQ99	DNA repair protein SWI5 homolog OS=Mus musculus GN=Swi5 PE=1 SV=1	6.88337	0.339634	1.26544		23.6954	2.38157	0.0592934	0.110567	-5.26621	0.513914	0.886485	1	0.0592934	0.110567
Pcnp	Q3UCC5|Q6P8I4	Q3UCC5	MCG130899 OS=Mus musculus GN=Pcnp PE=1 SV=1|PEST proteolytic signal-containing nuclear protein OS=Mus musculus GN=Pcnp PE=1 SV=1	7.68502	0.339531	1.26535		26	4.10007	0.00795235	0.0262283	-3.05615	0.261111	0.798705	1	0.00795235	0.0262283
Scpep1	Q920A5	Q920A5	Retinoid-inducible serine carboxypeptidase OS=Mus musculus GN=Scpep1 PE=1 SV=2	7.71834	0.339461	1.26528		25.6767	4.22132	0.0070197	0.0239675	-2.91558	0.247271	0.789807	1	0.0070197	0.0239675
Casp7	P97864|Q4FJQ4	P97864	Caspase-7 OS=Mus musculus GN=Casp7 PE=1 SV=2|Casp7 protein OS=Mus musculus GN=Casp7 PE=1 SV=1	7.3803	0.338191	1.26417		25.3935	6.37118	0.00105571	0.00757225	-0.764215	0.0807674	0.551034	1	0.00105571	0.00757225
Prkd3	D3Z6I0|Q5FWX6|Q8K1Y2	D3Z6I0	Serine/threonine-protein kinase D3 OS=Mus musculus GN=Prkd3 PE=1 SV=1|Serine/threonine-protein kinase OS=Mus musculus GN=Prkd3 PE=1 SV=1|Serine/threonine-protein kinase D3 OS=Mus musculus GN=Prkd3 PE=1 SV=1	7.02523	0.33801	1.26401		22.9155	2.64117	0.0425737	0.0867845	-4.91202	0.469122	0.87698	1	0.0425737	0.0867845
Q3TEI4	Q3TEI4	Q3TEI4	Uncharacterized protein C15orf39 homolog OS=Mus musculus PE=1 SV=2	6.30706	0.33772	1.26376		22.201	1.86498	0.116875	0.187529	-5.96934	0.609237	0.902515	1	0.116875	0.187529
Srcap|Gm42715	A0A087WNL7|A0A087WNX7|A0A087WP63|A0A087WQ44	A0A087WNL7	Protein Srcap OS=Mus musculus GN=Srcap PE=1 SV=1|Protein Srcap OS=Mus musculus GN=Srcap PE=1 SV=1|Protein Gm42715 (Fragment) OS=Mus musculus GN=Gm42715 PE=1 SV=1|Protein Srcap OS=Mus musculus GN=Srcap PE=1 SV=1	6.28492	0.337542	1.2636		22.8575	4.78394	0.00404462	0.0164713	-2.29197	0.189787	0.742534	1	0.00404462	0.0164713
Kif20b	Q80WE4|Q80WE4-3|Q80WE4-4	Q80WE4	Kinesin-like protein KIF20B OS=Mus musculus GN=Kif20b PE=1 SV=3|Isoform 3 of Kinesin-like protein KIF20B OS=Mus musculus GN=Kif20b|Isoform 4 of Kinesin-like protein KIF20B OS=Mus musculus GN=Kif20b	6.78681	0.337521	1.26358		25.3018	4.05875	0.00830184	0.0269833	-3.10456	0.265947	0.80164	1	0.00830184	0.0269833
Btbd11	Q6GQW0	Q6GQW0	Ankyrin repeat and BTB/POZ domain-containing protein BTBD11 OS=Mus musculus GN=Btbd11 PE=2 SV=2	5.85566	0.337436	1.26351		21.9721	5.06723	0.00311421	0.0140386	-1.99526	0.164876	0.714731	1	0.00311421	0.0140386
Vapb	Q8BH80|Q9QY76	Q8BH80	Vesicle-associated membrane protein, associated protein B and C OS=Mus musculus GN=Vapb PE=1 SV=1|Vesicle-associated membrane protein-associated protein B OS=Mus musculus GN=Vapb PE=1 SV=3	8.06127	0.336811	1.26296		26.1347	5.55703	0.00202887	0.0106404	-1.50801	0.127733	0.659983	1	0.00202887	0.0106404
Recql5	Q8VID5	Q8VID5	ATP-dependent DNA helicase Q5 OS=Mus musculus GN=Recql5 PE=1 SV=1	6.20526	0.336667	1.26284		21.8886	3.19646	0.0216275	0.0533845	-4.1727	0.380973	0.852709	1	0.0216275	0.0533845
Chfr	Q810L3|Q810L3-2|Q810L3-3|Q810L3-4	Q810L3	E3 ubiquitin-protein ligase CHFR OS=Mus musculus GN=Chfr PE=1 SV=1|Isoform 2 of E3 ubiquitin-protein ligase CHFR OS=Mus musculus GN=Chfr|Isoform 3 of E3 ubiquitin-protein ligase CHFR OS=Mus musculus GN=Chfr|Isoform 4 of E3 ubiquitin-protein ligase CHFR OS=Mus musculus GN=Chfr	6.46485	0.336562	1.26274		22.692	4.78377	0.00404525	0.0164713	-2.29214	0.189802	0.742549	1	0.00404525	0.0164713
Dhrs1	Q99L04	Q99L04	Dehydrogenase/reductase SDR family member 1 OS=Mus musculus GN=Dhrs1 PE=1 SV=1	7.43379	0.336197	1.26242		25.6814	6.29801	0.00111646	0.00764949	-0.827928	0.0843123	0.561636	1	0.00111646	0.00764949
Rpusd4	Q9CWX4	Q9CWX4	RNA pseudouridylate synthase domain-containing protein 4 OS=Mus musculus GN=Rpusd4 PE=2 SV=1	6.60716	0.336143	1.26238		21.9421	5.2613	0.0026189	0.0126341	-1.79839	0.149289	0.694058	1	0.0026189	0.0126341
Uck2	Q543C2|Q99PM9	Q543C2	Uridine kinase OS=Mus musculus GN=Uck2 PE=1 SV=1|Uridine-cytidine kinase 2 OS=Mus musculus GN=Uck2 PE=1 SV=1	6.8398	0.336122	1.26236		23.9354	4.5537	0.00504131	0.0190457	-2.54153	0.211992	0.763114	1	0.00504131	0.0190457
Ppp2r5b	Q6PD28	Q6PD28	Protein Ppp2r5b OS=Mus musculus GN=Ppp2r5b PE=1 SV=1	6.52507	0.336056	1.2623		23.3883	5.71042	0.0017843	0.0099771	-1.3618	0.117549	0.641098	1	0.0017843	0.0099771
Vamp8	A0A0R4J0R1|O70404	O70404	Vesicle-associated membrane protein 8 OS=Mus musculus GN=Vamp8 PE=1 SV=1|Vesicle-associated membrane protein 8 OS=Mus musculus GN=Vamp8 PE=1 SV=1	6.88097	0.335803	1.26208		22.8311	1.03673	0.344038	0.436462	-6.97567	0.776293	0.921854	1	0.344038	0.436462
Gfer	P56213	P56213	FAD-linked sulfhydryl oxidase ALR OS=Mus musculus GN=Gfer PE=1 SV=2	6.38359	0.335774	1.26205		22.1794	3.69754	0.0122252	0.0352633	-3.53873	0.310849	0.825287	1	0.0122252	0.0352633
Sntb2	Q542S9|Q61235	Q542S9	Beta-2-syntrophin OS=Mus musculus GN=Sntb2 PE=1 SV=1|Beta-2-syntrophin OS=Mus musculus GN=Sntb2 PE=1 SV=2	7.08991	0.335632	1.26193		25.0948	5.1209	0.00296717	0.0136036	-1.94031	0.160448	0.709148	1	0.00296717	0.0136036
Camkk1	Q8VBY2	Q8VBY2	Calcium/calmodulin-dependent protein kinase kinase 1 OS=Mus musculus GN=Camkk1 PE=1 SV=1	5.91511	0.334845	1.26124		22.0651	6.29327	0.00112054	0.00766075	-0.832078	0.0845464	0.562319	1	0.00112054	0.00766075
Arf4	P61750|Q14BR4	P61750	ADP-ribosylation factor 4 OS=Mus musculus GN=Arf4 PE=1 SV=2|ADP-ribosylation factor 4 OS=Mus musculus GN=Arf4 PE=1 SV=1	7.58497	0.33446	1.26091		25.0059	5.57386	0.00200022	0.0105906	-1.49182	0.126583	0.657951	1	0.00200022	0.0105906
Spice1	Q8C804	Q8C804	Spindle and centriole-associated protein 1 OS=Mus musculus GN=Spice1 PE=1 SV=2	6.73213	0.334453	1.2609		23.7794	4.60614	0.0047916	0.0184253	-2.48402	0.206777	0.758582	1	0.0047916	0.0184253
Aip	O08915	O08915	AH receptor-interacting protein OS=Mus musculus GN=Aip PE=1 SV=1	7.22489	0.33433	1.26079		24.8073	4.48014	0.00541725	0.0199858	-2.62291	0.219469	0.769322	1	0.00541725	0.0199858
Coro7	Q9D2V7	Q9D2V7	Coronin-7 OS=Mus musculus GN=Coro7 PE=1 SV=2	6.48778	0.334243	1.26072		23.4038	4.78755	0.00403089	0.0164551	-2.28811	0.189453	0.742197	1	0.00403089	0.0164551
Dyrk1a	A1L341|A9C475|Q61214	A1L341	Dual-specificity tyrosine-phosphorylation-regulated kinase 1A OS=Mus musculus GN=Dyrk1a PE=1 SV=1|Dual-specificity tyrosine-(Y)-phosphorylation regulated kinase 1a OS=Mus musculus GN=Dyrk1a PE=1 SV=1|Dual specificity tyrosine-phosphorylation-regulated kinase 1A OS=Mus musculus GN=Dyrk1a PE=1 SV=1	6.55926	0.334104	1.26059		23.3816	3.68239	0.0124306	0.0357143	-3.55736	0.312835	0.826203	1	0.0124306	0.0357143
Fam193a	M0QWZ1	M0QWZ1	Protein FAM193A OS=Mus musculus GN=Fam193a PE=1 SV=1	6.71287	0.333794	1.26032		25.1833	3.89703	0.00984812	0.0303435	-3.29651	0.285466	0.812662	1	0.00984812	0.0303435
Nisch	Q80TM9	Q80TM9	Nischarin OS=Mus musculus GN=Nisch PE=1 SV=2	7.28154	0.333675	1.26022		25.0573	4.61239	0.00476279	0.018351	-2.47719	0.206162	0.758036	1	0.00476279	0.018351
Inpp5f	Q8CDA1	Q8CDA1	Phosphatidylinositide phosphatase SAC2 OS=Mus musculus GN=Inpp5f PE=1 SV=1	7.33454	0.332954	1.25959		26.7731	6.11868	0.0012834	0.00827806	-0.986605	0.0935342	0.587007	1	0.0012834	0.00827806
Mapk9	Q9WTU6|Q9WTU6-2	Q9WTU6	Mitogen-activated protein kinase 9 OS=Mus musculus GN=Mapk9 PE=1 SV=2|Isoform Alpha-1 of Mitogen-activated protein kinase 9 OS=Mus musculus GN=Mapk9	7.27624	0.332742	1.2594		24.1916	4.17702	0.00734516	0.0248022	-2.96668	0.252266	0.793108	1	0.00734516	0.0248022
Cxxc1	Q541B1|Q9CWW7	Q541B1	CXXC finger 1 (PHD domain), isoform CRA_f OS=Mus musculus GN=Cxxc1 PE=1 SV=1|CXXC-type zinc finger protein 1 OS=Mus musculus GN=Cxxc1 PE=2 SV=1	6.96012	0.332062	1.25881		25.0985	4.75377	0.00416136	0.0167433	-2.32423	0.192595	0.745331	1	0.00416136	0.0167433
Dctn2	Q3TPZ5|Q99KJ8	Q3TPZ5	Dynactin 2 OS=Mus musculus GN=Dctn2 PE=1 SV=1|Dynactin subunit 2 OS=Mus musculus GN=Dctn2 PE=1 SV=3	7.81883	0.331557	1.25837		26.1095	3.63326	0.0131244	0.037103	-3.61804	0.319335	0.829136	1	0.0131244	0.037103
Cep192	E9Q4Y4	E9Q4Y4	Protein Cep192 OS=Mus musculus GN=Cep192 PE=1 SV=1	6.59106	0.331438	1.25827		23.7273	3.03127	0.0263282	0.0615417	-4.38914	0.406071	0.860543	1	0.0263282	0.0615417
Tapbp	Q3TCU5|Q9R233|Q9R233-2	Q3TCU5	Tapasin OS=Mus musculus GN=Tapbp PE=1 SV=1|Tapasin OS=Mus musculus GN=Tapbp PE=1 SV=2|Isoform Short of Tapasin OS=Mus musculus GN=Tapbp	7.08488	0.331283	1.25813		23.4572	3.16557	0.0224307	0.0547614	-4.21293	0.385593	0.854216	1	0.0224307	0.0547614
Uaca	A0A0R4J0S7|Q8CGB3|Q8CGB3-3	Q8CGB3	Uveal autoantigen with coiled-coil domains and ankyrin repeats OS=Mus musculus GN=Uaca PE=1 SV=1|Uveal autoantigen with coiled-coil domains and ankyrin repeats OS=Mus musculus GN=Uaca PE=1 SV=2|Isoform 3 of Uveal autoantigen with coiled-coil domains and ankyrin repeats OS=Mus musculus GN=Uaca	6.56938	0.331094	1.25797		24.8164	5.62063	0.00192302	0.0103594	-1.44702	0.12343	0.652251	1	0.00192302	0.0103594
Hars2	Q99KK9	Q99KK9	Probable histidine--tRNA ligase, mitochondrial OS=Mus musculus GN=Hars2 PE=1 SV=1	6.98127	0.330918	1.25781		24.2478	4.62058	0.00472532	0.0182307	-2.46824	0.205357	0.757317	1	0.00472532	0.0182307
Brms1l	Q3U1T3|Q3U1T3-2	Q3U1T3	Breast cancer metastasis-suppressor 1-like protein OS=Mus musculus GN=Brms1l PE=2 SV=1|Isoform 2 of Breast cancer metastasis-suppressor 1-like protein OS=Mus musculus GN=Brms1l	6.95681	0.330911	1.25781		24.3014	6.17148	0.0012314	0.00807697	-0.939504	0.0907384	0.579631	1	0.0012314	0.00807697
Fahd2a	A0A0R4J094	A0A0R4J094	Fumarylacetoacetate hydrolase domain-containing protein 2A OS=Mus musculus GN=Fahd2a PE=1 SV=1	6.47484	0.329937	1.25696		23.7466	4.09271	0.00801335	0.026296	-3.06475	0.261968	0.799232	1	0.00801335	0.026296
Ccnb2	P30276	P30276	G2/mitotic-specific cyclin-B2 OS=Mus musculus GN=Ccnb2 PE=1 SV=2	6.62604	0.329345	1.25644		24.3311	4.09083	0.00802898	0.026317	-3.06695	0.262186	0.799365	1	0.00802898	0.026317
Ap2a1	P17426|P17426-2	P17426	AP-2 complex subunit alpha-1 OS=Mus musculus GN=Ap2a1 PE=1 SV=1|Isoform B of AP-2 complex subunit alpha-1 OS=Mus musculus GN=Ap2a1	7.90707	0.328614	1.25581		26.1033	6.08392	0.00131902	0.0084154	-1.01778	0.0954118	0.591817	1	0.00131902	0.0084154
Atp6v1e1	P50518	P50518	V-type proton ATPase subunit E 1 OS=Mus musculus GN=Atp6v1e1 PE=1 SV=2	7.83043	0.328129	1.25538		26.3027	4.25347	0.00679377	0.0234298	-2.87868	0.243689	0.787375	1	0.00679377	0.0234298
Kansl1	A2A5Y4|Q80TG1	A2A5Y4	KAT8 regulatory NSL complex subunit 1 OS=Mus musculus GN=Kansl1 PE=1 SV=1|KAT8 regulatory NSL complex subunit 1 OS=Mus musculus GN=Kansl1 PE=1 SV=1	6.36983	0.328113	1.25537		23.7294	2.46889	0.0529933	0.102057	-5.14676	0.498604	0.883406	1	0.0529933	0.102057
Dnase2a|Dnase2	D3Z512|D3Z5U3|P56542|Q3UM14	D3Z512	Deoxyribonuclease-2-alpha OS=Mus musculus GN=Dnase2a PE=1 SV=1|Deoxyribonuclease-2-alpha (Fragment) OS=Mus musculus GN=Dnase2a PE=1 SV=7|Deoxyribonuclease-2-alpha OS=Mus musculus GN=Dnase2 PE=1 SV=1|Deoxyribonuclease II alpha OS=Mus musculus GN=Dnase2a PE=1 SV=1	6.57557	0.327779	1.25508		23.1881	3.69954	0.0121983	0.0352505	-3.53627	0.310587	0.825165	1	0.0121983	0.0352505
Ppp1r10	Q80W00	Q80W00	Serine/threonine-protein phosphatase 1 regulatory subunit 10 OS=Mus musculus GN=Ppp1r10 PE=1 SV=1	7.21248	0.327233	1.2546		26.0093	3.49005	0.0154088	0.041702	-3.79692	0.338782	0.837349	1	0.0154088	0.041702
Gse1	Q3U3C9|Q3U3C9-2|Q3U3C9-3	Q3U3C9	Genetic suppressor element 1 OS=Mus musculus GN=Gse1 PE=1 SV=2|Isoform 2 of Genetic suppressor element 1 OS=Mus musculus GN=Gse1|Isoform 3 of Genetic suppressor element 1 OS=Mus musculus GN=Gse1	6.01242	0.326287	1.25378		22.365	1.7534	0.135555	0.21037	-6.11763	0.630814	0.905534	1	0.135555	0.21037
Tmem102	Q3UPR7	Q3UPR7	Transmembrane protein 102 OS=Mus musculus GN=Tmem102 PE=1 SV=2	6.13547	0.324991	1.25266		23.0494	3.78649	0.0110931	0.032979	-3.42999	0.299352	0.819786	1	0.0110931	0.032979
Cdc16	Q3TI84|Q8R349	Q3TI84	CDC16 cell division cycle 16 homolog (S. cerevisiae), isoform CRA_e OS=Mus musculus GN=Cdc16 PE=1 SV=1|Cell division cycle protein 16 homolog OS=Mus musculus GN=Cdc16 PE=1 SV=1	7.52171	0.324601	1.25232		25.9633	5.43399	0.00225342	0.0114168	-1.62745	0.136388	0.674537	1	0.00225342	0.0114168
Psap	E9PZ00|J3QPG5|K3W4L3|Q3UFE8|Q61207|Q8BFQ1	E9PZ00	Prosaposin OS=Mus musculus GN=Psap PE=1 SV=1|Prosaposin OS=Mus musculus GN=Psap PE=1 SV=1|Prosaposin OS=Mus musculus GN=Psap PE=1 SV=1|Prosaposin OS=Mus musculus GN=Psap PE=1 SV=1|Prosaposin OS=Mus musculus GN=Psap PE=1 SV=2|Prosaposin OS=Mus musculus GN=Psap PE=1 SV=1	6.96307	0.324418	1.25216		25.1184	4.66559	0.00452548	0.0177063	-2.4193	0.200978	0.753334	1	0.00452548	0.0177063
C2cd2	E9Q3C1	E9Q3C1	Protein C2cd2 OS=Mus musculus GN=C2cd2 PE=1 SV=1	6.25653	0.324152	1.25193		23.0443	4.86734	0.00374098	0.0156808	-2.20344	0.182181	0.734638	1	0.00374098	0.0156808
Hps5	E9Q3X4|P59438	E9Q3X4	Hermansky-Pudlak syndrome 5 protein homolog OS=Mus musculus GN=Hps5 PE=1 SV=1|Hermansky-Pudlak syndrome 5 protein homolog OS=Mus musculus GN=Hps5 PE=1 SV=2	6.83153	0.323951	1.25175		24.9173	5.70952	0.00178562	0.0099771	-1.36264	0.117607	0.641211	1	0.00178562	0.0099771
Mta2	Q9R190	Q9R190	Metastasis-associated protein MTA2 OS=Mus musculus GN=Mta2 PE=1 SV=1	8.16851	0.323917	1.25172		27.4873	5.62703	0.00191273	0.0103422	-1.44092	0.123003	0.651466	1	0.00191273	0.0103422
Ptprf	A2A8L5	A2A8L5	Receptor-type tyrosine-protein phosphatase F OS=Mus musculus GN=Ptprf PE=1 SV=1	6.73095	0.323596	1.25145		25.2158	5.81268	0.00164021	0.00956189	-1.26594	0.111121	0.628059	1	0.00164021	0.00956189
Sh3bgrl2	A0A087WQX3|A0A087WS96|Q8BG73	Q8BG73	SH3 domain-binding glutamic acid-rich-like protein 2 OS=Mus musculus GN=Sh3bgrl2 PE=1 SV=1|SH3 domain-binding glutamic acid-rich-like protein OS=Mus musculus GN=Sh3bgrl2 PE=1 SV=1|SH3 domain-binding glutamic acid-rich-like protein 2 OS=Mus musculus GN=Sh3bgrl2 PE=1 SV=1	6.52428	0.323443	1.25131		22.2037	4.35476	0.00613439	0.0219495	-2.76343	0.232643	0.779505	1	0.00613439	0.0219495
Erc1	V9GXP8	V9GXP8	ELKS/Rab6-interacting/CAST family member 1 OS=Mus musculus GN=Erc1 PE=1 SV=1	7.34007	0.323058	1.25098		27.0519	5.93305	0.0014876	0.00901549	-1.15474	0.103915	0.612266	1	0.0014876	0.00901549
Ufd1l	P70362	P70362	Ubiquitin fusion degradation protein 1 homolog OS=Mus musculus GN=Ufd1l PE=1 SV=2	7.67639	0.322958	1.25089		25.4509	5.12414	0.00295855	0.0135855	-1.937	0.160184	0.708808	1	0.00295855	0.0135855
Gm5814|Mrfap1	J3QP80|Q9CQL7	Q9CQL7	MCG15559 OS=Mus musculus GN=Gm5814 PE=4 SV=1|MORF4 family-associated protein 1 OS=Mus musculus GN=Mrfap1 PE=1 SV=1	6.46071	0.322927	1.25087		21.9494	2.92522	0.0299368	0.067434	-4.52978	0.422691	0.865288	1	0.0299368	0.067434
Fbxl20	Q9CZV8|Q9CZV8-3|Q9CZV8-4	Q9CZV8	F-box/LRR-repeat protein 20 OS=Mus musculus GN=Fbxl20 PE=1 SV=3|Isoform 3 of F-box/LRR-repeat protein 20 OS=Mus musculus GN=Fbxl20|Isoform 2 of F-box/LRR-repeat protein 20 OS=Mus musculus GN=Fbxl20	7.37206	0.322312	1.25033		25.3485	3.60326	0.0135695	0.0378859	-3.65527	0.323348	0.830898	1	0.0135695	0.0378859
Vcl	Q64727	Q64727	Vinculin OS=Mus musculus GN=Vcl PE=1 SV=4	8.39502	0.321104	1.24929		28.8032	4.58115	0.0049088	0.0187275	-2.51138	0.209251	0.760753	1	0.0049088	0.0187275
Gripap1	A2AEW8|A2AEW9|Q8VD04	A2AEW8	GRIP1-associated protein 1 OS=Mus musculus GN=Gripap1 PE=1 SV=1|GRIP1-associated protein 1 OS=Mus musculus GN=Gripap1 PE=1 SV=1|GRIP1-associated protein 1 OS=Mus musculus GN=Gripap1 PE=1 SV=1	6.7045	0.321016	1.24921		23.9935	5.34883	0.00242571	0.0120007	-1.71126	0.142638	0.684296	1	0.00242571	0.0120007
Dctn3	E9Q919|Q9Z0Y1	E9Q919	Dynactin subunit 3 OS=Mus musculus GN=Dctn3 PE=1 SV=1|Dynactin subunit 3 OS=Mus musculus GN=Dctn3 PE=1 SV=2	7.19717	0.320541	1.2488		25.3455	4.44234	0.00562283	0.0206005	-2.66503	0.223383	0.772444	1	0.00562283	0.0206005
Apbb1	A0A0R4J2C1|A0A0R4J2C6|Q9QXJ1	Q9QXJ1	Amyloid beta A4 precursor protein-binding family B member 1 OS=Mus musculus GN=Apbb1 PE=1 SV=1|Amyloid beta (A4) protein-binding, family B, member 1, isoform CRA_e OS=Mus musculus GN=Apbb1 PE=1 SV=1|Amyloid beta A4 precursor protein-binding family B member 1 OS=Mus musculus GN=Apbb1 PE=1 SV=3	6.71392	0.320295	1.24859		23.3508	3.38908	0.017288	0.045512	-3.92482	0.352941	0.842849	1	0.017288	0.045512
Mmp14	P53690	P53690	Matrix metalloproteinase-14 OS=Mus musculus GN=Mmp14 PE=2 SV=3	7.15908	0.320014	1.24834		25.1521	5.00685	0.00328981	0.0144716	-2.05756	0.169968	0.720892	1	0.00328981	0.0144716
Dgkz	A2AHJ7|A2AHK0|Q80UP3	A2AHJ7	Diacylglycerol kinase OS=Mus musculus GN=Dgkz PE=1 SV=1|Diacylglycerol kinase OS=Mus musculus GN=Dgkz PE=1 SV=1|Diacylglycerol kinase zeta OS=Mus musculus GN=Dgkz PE=1 SV=2	6.61797	0.319812	1.24817		23.6536	4.54879	0.00506548	0.0190998	-2.54694	0.212486	0.763534	1	0.00506548	0.0190998
Ston2	E9PXP7|Q8BZ60	E9PXP7	Stonin-2 OS=Mus musculus GN=Ston2 PE=1 SV=1|Stonin-2 OS=Mus musculus GN=Ston2 PE=1 SV=1	6.66095	0.31915	1.2476		23.8501	4.08675	0.00806312	0.0263694	-3.07172	0.262663	0.799656	1	0.00806312	0.0263694
Ccdc186	Q8C9S4	Q8C9S4	Coiled-coil domain-containing protein 186 OS=Mus musculus GN=Ccdc186 PE=1 SV=2	6.93155	0.319139	1.24759		25.4703	3.72546	0.0118564	0.0345767	-3.50447	0.30721	0.823582	1	0.0118564	0.0345767
Rnf214	Q8BFU3	Q8BFU3	RING finger protein 214 OS=Mus musculus GN=Rnf214 PE=1 SV=1	6.81452	0.318981	1.24745		24.7403	5.40893	0.0023026	0.0115787	-1.65201	0.138204	0.677435	1	0.0023026	0.0115787
Znf48	Q3US17	Q3US17	Zinc finger protein 48 OS=Mus musculus GN=Znf48 PE=1 SV=2	6.4722	0.318813	1.2473		23.9424	5.05222	0.00315683	0.0141172	-2.0107	0.166131	0.716275	1	0.00315683	0.0141172
Commd1	A2RSF1|Q8K4M5|Q8VI86	A2RSF1	COMM domain containing 1 OS=Mus musculus GN=Commd1 PE=1 SV=1|COMM domain-containing protein 1 OS=Mus musculus GN=Commd1 PE=1 SV=2|COMM domain containing 1, isoform CRA_b OS=Mus musculus GN=Commd1 PE=1 SV=1	6.42805	0.318638	1.24715		23.1622	4.08797	0.00805292	0.0263694	-3.0703	0.262521	0.79957	1	0.00805292	0.0263694
Stat2	E9QJX9|Q9QXJ2	E9QJX9	Signal transducer and activator of transcription OS=Mus musculus GN=Stat2 PE=1 SV=2|Signal transducer and activator of transcription OS=Mus musculus GN=Stat2 PE=1 SV=1	7.05362	0.317885	1.2465		25.2287	5.53466	0.0020677	0.0107891	-1.52958	0.129274	0.662669	1	0.0020677	0.0107891
Lpin2	E9PWN0|Q99PI5	E9PWN0	Phosphatidate phosphatase LPIN2 OS=Mus musculus GN=Lpin2 PE=1 SV=1|Phosphatidate phosphatase LPIN2 OS=Mus musculus GN=Lpin2 PE=1 SV=2	6.2215	0.31783	1.24645		22.8612	5.19504	0.00277701	0.0130387	-1.86503	0.154479	0.701267	1	0.00277701	0.0130387
Tbc1d2b	Q3U0J8	Q3U0J8	TBC1 domain family member 2B OS=Mus musculus GN=Tbc1d2b PE=1 SV=2	7.18699	0.317759	1.24639		25.5574	5.59741	0.00196091	0.010457	-1.46923	0.124988	0.655091	1	0.00196091	0.010457
Lchn	Q3UHG7|Q3UHG7-2	Q3UHG7	Protein LCHN OS=Mus musculus GN=Lchn PE=2 SV=1|Isoform 2 of Protein LCHN OS=Mus musculus GN=Lchn	6.19076	0.317494	1.24616		22.599	5.04468	0.0031785	0.0141814	-2.01847	0.166764	0.717047	1	0.0031785	0.0141814
Zbtb11	G5E8B9	G5E8B9	MCG130893 OS=Mus musculus GN=Zbtb11 PE=1 SV=1	6.6858	0.317242	1.24595		24.6798	3.91474	0.00966381	0.0299542	-3.2753	0.283283	0.81149	1	0.00966381	0.0299542
Tbc1d8	A0A0A6YWY1|Q9Z1A9	Q9Z1A9	TBC1 domain family member 8 OS=Mus musculus GN=Tbc1d8 PE=1 SV=1|TBC1 domain family member 8 OS=Mus musculus GN=Tbc1d8 PE=1 SV=2	6.61026	0.316947	1.24569		23.3186	3.88016	0.0100274	0.0307699	-3.31676	0.287556	0.81377	1	0.0100274	0.0307699
Slc25a25	A2ASZ8|A2ASZ8-2|A2ASZ8-3|A2ASZ8-4|A2ASZ8-5	A2ASZ8	Calcium-binding mitochondrial carrier protein SCaMC-2 OS=Mus musculus GN=Slc25a25 PE=1 SV=1|Isoform 2 of Calcium-binding mitochondrial carrier protein SCaMC-2 OS=Mus musculus GN=Slc25a25|Isoform 3 of Calcium-binding mitochondrial carrier protein SCaMC-2 OS=Mus musculus GN=Slc25a25|Isoform 4 of Calcium-binding mitochondrial carrier protein SCaMC-2 OS=Mus musculus GN=Slc25a25|Isoform 5 of Calcium-b…	7.05253	0.316945	1.24569		23.6749	5.68942	0.00181567	0.0100319	-1.38164	0.118904	0.643732	1	0.00181567	0.0100319
Tgoln1	Q4FJY3|Q62313	Q4FJY3	MCG129299 OS=Mus musculus GN=Tgoln1 PE=1 SV=1|Trans-Golgi network integral membrane protein 1 OS=Mus musculus GN=Tgoln1 PE=1 SV=1	6.45346	0.316862	1.24562		23.3095	5.69012	0.00181462	0.0100319	-1.38098	0.118859	0.643644	1	0.00181462	0.0100319
Prdx6	O08709	O08709	Peroxiredoxin-6 OS=Mus musculus GN=Prdx6 PE=1 SV=3	8.65192	0.316753	1.24552		27.3782	5.01731	0.00325857	0.0143749	-2.04673	0.169077	0.719833	1	0.00325857	0.0143749
Men1	A0A0R4J1I3|D3YZC2|F8WHD9|O88559	O88559	Menin OS=Mus musculus GN=Men1 PE=1 SV=1|Menin OS=Mus musculus GN=Men1 PE=1 SV=1|Menin OS=Mus musculus GN=Men1 PE=1 SV=1|Menin OS=Mus musculus GN=Men1 PE=1 SV=2	7.02357	0.316676	1.24546		24.2665	2.13514	0.08176	0.140817	-5.60349	0.558406	0.894576	1	0.08176	0.140817
Cnot7	Q543X5|Q60809	Q543X5	CCR4-NOT transcription complex subunit 7 OS=Mus musculus GN=Cnot7 PE=1 SV=1|CCR4-NOT transcription complex subunit 7 OS=Mus musculus GN=Cnot7 PE=1 SV=1	6.98135	0.316661	1.24544		23.6754	5.07725	0.00308614	0.013962	-1.98497	0.164043	0.713697	1	0.00308614	0.013962
Kif3a	B1AQZ2|P28741|Q3TET1|Q3UI47	B1AQZ2	Kinesin-like protein OS=Mus musculus GN=Kif3a PE=1 SV=1|Kinesin-like protein KIF3A OS=Mus musculus GN=Kif3a PE=1 SV=2|Kinesin-like protein OS=Mus musculus GN=Kif3a PE=1 SV=1|Kinesin-like protein OS=Mus musculus GN=Kif3a PE=1 SV=1	7.30326	0.316472	1.24528		25.8614	4.94854	0.00347029	0.0149668	-2.1182	0.174996	0.726719	1	0.00347029	0.0149668
Rnf31	Q924T7|Q924T7-2	Q924T7	E3 ubiquitin-protein ligase RNF31 OS=Mus musculus GN=Rnf31 PE=1 SV=2|Isoform 2 of E3 ubiquitin-protein ligase RNF31 OS=Mus musculus GN=Rnf31	7.09244	0.316311	1.24514		25.1638	5.96088	0.00145471	0.00889021	-1.12928	0.102303	0.608548	1	0.00145471	0.00889021
Rbms1	E9PZ21	E9PZ21	RNA-binding motif, single-stranded-interacting protein 1 OS=Mus musculus GN=Rbms1 PE=1 SV=1	7.36407	0.316163	1.24501		25.3407	5.37436	0.00237251	0.0117925	-1.68603	0.140741	0.681397	1	0.00237251	0.0117925
Pip5k1c	F8WHW6|O70161|O70161-3	F8WHW6	Phosphatidylinositol 4-phosphate 5-kinase type-1 gamma OS=Mus musculus GN=Pip5k1c PE=1 SV=1|Phosphatidylinositol 4-phosphate 5-kinase type-1 gamma OS=Mus musculus GN=Pip5k1c PE=1 SV=2|Isoform 3 of Phosphatidylinositol 4-phosphate 5-kinase type-1 gamma OS=Mus musculus GN=Pip5k1c	6.12144	0.315626	1.24455		22.2684	4.19753	0.0071924	0.0244424	-2.94299	0.249945	0.791587	1	0.0071924	0.0244424
Ngdn	Q9DB96	Q9DB96	Neuroguidin OS=Mus musculus GN=Ngdn PE=1 SV=1	7.28487	0.315461	1.24441		24.3798	5.66005	0.00186063	0.0101637	-1.40949	0.12082	0.647389	1	0.00186063	0.0101637
Nufip2	Q5F2E7	Q5F2E7	Nuclear fragile X mental retardation-interacting protein 2 OS=Mus musculus GN=Nufip2 PE=1 SV=1	7.29438	0.315274	1.24425		26.28	2.85419	0.0326571	0.0715345	-4.62466	0.434043	0.868347	1	0.0326571	0.0715345
Stx5	Q8K1E0	Q8K1E0	Syntaxin-5 OS=Mus musculus GN=Stx5 PE=1 SV=3	7.54717	0.315249	1.24423		26.3117	4.75533	0.00415525	0.0167433	-2.32256	0.192449	0.745188	1	0.00415525	0.0167433
Rrp36	Q3UFY0	Q3UFY0	Ribosomal RNA processing protein 36 homolog OS=Mus musculus GN=Rrp36 PE=1 SV=1	7.01914	0.315217	1.2442		23.7246	2.99955	0.0273546	0.0632953	-4.43107	0.411001	0.861985	1	0.0273546	0.0632953
Rbm15b	Q6PHZ5	Q6PHZ5	Putative RNA-binding protein 15B OS=Mus musculus GN=Rbm15b PE=1 SV=2	6.68312	0.315051	1.24406		23.5153	3.97239	0.00909014	0.0286492	-3.20657	0.276252	0.807616	1	0.00909014	0.0286492
Rbfa	Q3UKZ0|Q6P3B9	Q3UKZ0	Putative ribosome-binding factor A, mitochondrial OS=Mus musculus GN=Rbfa PE=1 SV=1|Putative ribosome-binding factor A, mitochondrial OS=Mus musculus GN=Rbfa PE=2 SV=1	6.50267	0.314787	1.24383		23.1843	4.34603	0.00618829	0.0220745	-2.77331	0.233581	0.780196	1	0.00618829	0.0220745
Pik3r2	O08908	O08908	Phosphatidylinositol 3-kinase regulatory subunit beta OS=Mus musculus GN=Pik3r2 PE=1 SV=2	6.72891	0.313736	1.24292		24.8424	5.43579	0.00224992	0.0114168	-1.62568	0.136257	0.674327	1	0.00224992	0.0114168
Ube2j1	F6SPK0|Q9JJZ4	F6SPK0	Ubiquitin-conjugating enzyme E2 J1 (Fragment) OS=Mus musculus GN=Ube2j1 PE=1 SV=1|Ubiquitin-conjugating enzyme E2 J1 OS=Mus musculus GN=Ube2j1 PE=1 SV=2	7.12839	0.313347	1.24259		24.0414	3.80694	0.01085	0.032522	-3.40516	0.29675	0.818493	1	0.01085	0.032522
Terf1	P70371|Q3V252	P70371	Telomeric repeat-binding factor 1 OS=Mus musculus GN=Terf1 PE=1 SV=1|Telomeric repeat-binding factor 1 OS=Mus musculus GN=Terf1 PE=1 SV=1	6.68944	0.31299	1.24228		23.7577	3.12844	0.02344	0.0564696	-4.26142	0.391191	0.856002	1	0.02344	0.0564696
Grk5	Q3TST4|Q8VEB1	Q3TST4	Protein-serine/threonine kinase OS=Mus musculus GN=Grk5 PE=1 SV=1|G protein-coupled receptor kinase 5 OS=Mus musculus GN=Grk5 PE=1 SV=2	6.48125	0.3127	1.24203		22.5853	5.00652	0.00329081	0.0144716	-2.05791	0.169997	0.720925	1	0.00329081	0.0144716
Ring1	O35730	O35730	E3 ubiquitin-protein ligase RING1 OS=Mus musculus GN=Ring1 PE=1 SV=2	6.08281	0.311489	1.24099		20.5922	4.29407	0.0065202	0.0228384	-2.8323	0.239218	0.784258	1	0.0065202	0.0228384
Cep135	Q6P5D4	Q6P5D4	Centrosomal protein of 135 kDa OS=Mus musculus GN=Cep135 PE=1 SV=1	5.98839	0.310999	1.24057		21.2233	4.41111	0.00579945	0.0210619	-2.69999	0.226655	0.77499	1	0.00579945	0.0210619
Nit1	Q8VDK1|Q8VDK1-2	Q8VDK1	Nitrilase homolog 1 OS=Mus musculus GN=Nit1 PE=1 SV=2|Isoform 2 of Nitrilase homolog 1 OS=Mus musculus GN=Nit1	6.71041	0.310945	1.24052		24.1736	5.31618	0.00249578	0.0122639	-1.74364	0.145092	0.687969	1	0.00249578	0.0122639
Lrrfip2	A0A0G2JEP4	A0A0G2JEP4	Leucine-rich repeat flightless-interacting protein 2 OS=Mus musculus GN=Lrrfip2 PE=1 SV=1	7.1463	0.31074	1.24034		25.2524	2.0259	0.0944255	0.158274	-5.75226	0.57871	0.897898	1	0.0944255	0.158274
Iba57	Q8CAK1	Q8CAK1	Putative transferase CAF17 homolog, mitochondrial OS=Mus musculus GN=Iba57 PE=1 SV=1	6.76979	0.310412	1.24006		23.3037	3.74682	0.0115827	0.034057	-3.47834	0.304444	0.822264	1	0.0115827	0.034057
Cep170b	Q80U49	Q80U49	Centrosomal protein of 170 kDa protein B OS=Mus musculus GN=Cep170b PE=1 SV=2	7.26692	0.310167	1.23985		26.0033	2.59354	0.0452133	0.0907616	-4.97676	0.477177	0.878805	1	0.0452133	0.0907616
Acot11	A2AVR6|Q543P6|Q8VHQ9	A2AVR6	Acyl-coenzyme A thioesterase 11 OS=Mus musculus GN=Acot11 PE=1 SV=1|Acyl-CoA thioesterase 11 OS=Mus musculus GN=Acot11 PE=1 SV=1|Acyl-coenzyme A thioesterase 11 OS=Mus musculus GN=Acot11 PE=1 SV=1	6.62605	0.30896	1.23881		23.6393	4.23712	0.00690759	0.0236681	-2.89742	0.245506	0.788615	1	0.00690759	0.0236681
Dcaf10	A2AKB9|A2AKB9-3	A2AKB9	DDB1- and CUL4-associated factor 10 OS=Mus musculus GN=Dcaf10 PE=1 SV=1|Isoform 3 of DDB1- and CUL4-associated factor 10 OS=Mus musculus GN=Dcaf10	6.17114	0.308725	1.23861		22.811	2.63814	0.0427365	0.0870287	-4.91613	0.469632	0.877098	1	0.0427365	0.0870287
Fn3krp	Q8K274	Q8K274	Ketosamine-3-kinase OS=Mus musculus GN=Fn3krp PE=1 SV=2	7.30541	0.308546	1.23846		24.6609	4.72698	0.00426832	0.0170674	-2.353	0.195114	0.747791	1	0.00426832	0.0170674
Ston1	Q8CDJ8	Q8CDJ8	Stonin-1 OS=Mus musculus GN=Ston1 PE=1 SV=2	7.17642	0.308382	1.23832		25.8723	4.12446	0.00775393	0.0257638	-3.0277	0.258285	0.79695	1	0.00775393	0.0257638
Dnajc8	A2ALF2|A2ALF3|Q6NZB0	A2ALF2	DnaJ (Hsp40) homolog, subfamily C, member 8 OS=Mus musculus GN=Dnajc8 PE=1 SV=1|DnaJ homolog subfamily C member 8 OS=Mus musculus GN=Dnajc8 PE=1 SV=1|DnaJ homolog subfamily C member 8 OS=Mus musculus GN=Dnajc8 PE=1 SV=2	7.89488	0.308287	1.23824		26.3655	1.86588	0.116735	0.187459	-5.96813	0.609063	0.90249	1	0.116735	0.187459
Cfap36	Q8C6E0	Q8C6E0	Cilia- and flagella-associated protein 36 OS=Mus musculus GN=Cfap36 PE=1 SV=1	6.63453	0.308077	1.23806		23.8106	3.88724	0.0099518	0.03057	-3.30826	0.286678	0.813306	1	0.0099518	0.03057
Usp9x	G3UY52|P70398|Q4FE56	G3UY52	Probable ubiquitin carboxyl-terminal hydrolase FAF-X (Fragment) OS=Mus musculus GN=Usp9x PE=1 SV=1|Probable ubiquitin carboxyl-terminal hydrolase FAF-X OS=Mus musculus GN=Usp9x PE=1 SV=2|Probable ubiquitin carboxyl-terminal hydrolase FAF-X OS=Mus musculus GN=Usp9x PE=1 SV=1	8.27498	0.307186	1.23729		29.0358	5.71932	0.0017712	0.00993715	-1.35341	0.116979	0.639978	1	0.0017712	0.00993715
Tle3	E0CXS2|E0CXS9|E0CY14|F8WIE2|Q08122|Q08122-1|Q08122-2|Q08122-4	E0CXS2	Transducin-like enhancer protein 3 OS=Mus musculus GN=Tle3 PE=1 SV=1|Transducin-like enhancer protein 3 OS=Mus musculus GN=Tle3 PE=1 SV=1|Transducin-like enhancer protein 3 OS=Mus musculus GN=Tle3 PE=1 SV=1|Transducin-like enhancer protein 3 OS=Mus musculus GN=Tle3 PE=1 SV=1|Transducin-like enhancer protein 3 OS=Mus musculus GN=Tle3 PE=1 SV=3|Isoform 1 of Transducin-like enhancer protein 3 OS=Mus…	7.3039	0.306798	1.23696		24.1213	3.59573	0.0136838	0.0380739	-3.66463	0.324359	0.831336	1	0.0136838	0.0380739
Siae	P70665|P70665-2	P70665	Sialate O-acetylesterase OS=Mus musculus GN=Siae PE=1 SV=3|Isoform 2 of Sialate O-acetylesterase OS=Mus musculus GN=Siae	6.87587	0.306502	1.23671		23.1612	3.81705	0.010732	0.0323014	-3.3929	0.295469	0.817849	1	0.010732	0.0323014
Spred1	Q924S8	Q924S8	Sprouty-related, EVH1 domain-containing protein 1 OS=Mus musculus GN=Spred1 PE=1 SV=1	6.33615	0.30639	1.23661		22.9771	4.56062	0.00500754	0.0189797	-2.53392	0.211299	0.762521	1	0.00500754	0.0189797
Tjp1	A0A0U1RPB2|B9EHJ3	B9EHJ3	Tight junction protein ZO-1 (Fragment) OS=Mus musculus GN=Tjp1 PE=1 SV=1|Tight junction protein ZO-1 OS=Mus musculus GN=Tjp1 PE=1 SV=1	8.04736	0.306246	1.23649		28.441	5.18734	0.0027961	0.0130875	-1.87282	0.155091	0.702095	1	0.0027961	0.0130875
Kank2	Q8BX02	Q8BX02	KN motif and ankyrin repeat domain-containing protein 2 OS=Mus musculus GN=Kank2 PE=1 SV=1	7.29571	0.306212	1.23646		26.3717	5.60202	0.00195331	0.0104356	-1.46481	0.124677	0.654528	1	0.00195331	0.0104356
Mdc1	E9QK89|Q5PSV9	E9QK89	Mediator of DNA damage checkpoint protein 1 OS=Mus musculus GN=Mdc1 PE=1 SV=1|Mediator of DNA damage checkpoint protein 1 OS=Mus musculus GN=Mdc1 PE=1 SV=1	7.63329	0.30585	1.23615		26.4829	3.70039	0.012187	0.0352505	-3.53523	0.310476	0.825114	1	0.012187	0.0352505
Jup	Q02257	Q02257	Junction plakoglobin OS=Mus musculus GN=Jup PE=1 SV=3	7.21375	0.305687	1.23601		26.1071	1.38139	0.221591	0.307909	-6.58953	0.704971	0.914623	1	0.221591	0.307909
Tmed4	Q8R1V4	Q8R1V4	Transmembrane emp24 domain-containing protein 4 OS=Mus musculus GN=Tmed4 PE=1 SV=1	7.69118	0.305593	1.23593		25.6236	5.24617	0.00265406	0.0127042	-1.81356	0.150462	0.695718	1	0.00265406	0.0127042
Stambp	Q9CQ26	Q9CQ26	STAM-binding protein OS=Mus musculus GN=Stambp PE=1 SV=1	6.83093	0.304918	1.23535		24.1227	4.12173	0.0077758	0.0258105	-3.03087	0.258599	0.797147	1	0.0077758	0.0258105
Taf7	Q9R1C0	Q9R1C0	Transcription initiation factor TFIID subunit 7 OS=Mus musculus GN=Taf7 PE=1 SV=1	6.27927	0.304242	1.23477		23.0141	5.69825	0.0018024	0.0100061	-1.37329	0.118333	0.642626	1	0.0018024	0.0100061
Flot1	G3UYU4|O08917|Q540I4	G3UYU4	Flotillin-1 OS=Mus musculus GN=Flot1 PE=1 SV=1|Flotillin-1 OS=Mus musculus GN=Flot1 PE=1 SV=1|Flotillin 1 OS=Mus musculus GN=Flot1 PE=1 SV=1	7.51546	0.304215	1.23475		26.0529	5.67758	0.00183365	0.0100833	-1.39286	0.119674	0.64521	1	0.00183365	0.0100833
Rnf169	E9Q7F2	E9Q7F2	E3 ubiquitin-protein ligase RNF169 OS=Mus musculus GN=Rnf169 PE=1 SV=1	6.4369	0.304214	1.23475		21.985	3.33134	0.0184771	0.0476506	-3.99859	0.361203	0.84589	1	0.0184771	0.0476506
Gsk3b	E9QAQ5|Q5KU03|Q9WV60	E9QAQ5	Glycogen synthase kinase-3 beta OS=Mus musculus GN=Gsk3b PE=1 SV=1|Glycogen synthase kinase 3 beta OS=Mus musculus GN=Gsk3b PE=1 SV=1|Glycogen synthase kinase-3 beta OS=Mus musculus GN=Gsk3b PE=1 SV=2	7.38034	0.303744	1.23434		24.7084	5.56359	0.00201764	0.0106338	-1.50169	0.127284	0.659192	1	0.00201764	0.0106338
Rabgap1	A2AWA9	A2AWA9	Rab GTPase-activating protein 1 OS=Mus musculus GN=Rabgap1 PE=1 SV=1	7.4843	0.303305	1.23397		27.3811	4.2273	0.006977	0.0238778	-2.9087	0.246602	0.789357	1	0.006977	0.0238778
Tmed8	Q3UHI4	Q3UHI4	Protein TMED8 OS=Mus musculus GN=Tmed8 PE=2 SV=1	6.76567	0.303251	1.23392		22.7676	5.57545	0.00199753	0.0105906	-1.49029	0.126475	0.657758	1	0.00199753	0.0105906
Clic1	Q542F1|Q9Z1Q5	Q542F1	Chloride intracellular channel protein OS=Mus musculus GN=Clic1 PE=1 SV=1|Chloride intracellular channel protein 1 OS=Mus musculus GN=Clic1 PE=1 SV=3	8.21924	0.303188	1.23387		26.754	5.44123	0.00223943	0.011379	-1.62036	0.135866	0.673696	1	0.00223943	0.011379
Golim4	D3YVW2	D3YVW2	Golgi integral membrane protein 4 OS=Mus musculus GN=Golim4 PE=1 SV=1	6.88529	0.302706	1.23346		25.2671	5.2402	0.00266809	0.0127415	-1.81955	0.150927	0.696371	1	0.00266809	0.0127415
Vezt	D3Z4E6	D3Z4E6	Vezatin OS=Mus musculus GN=Vezt PE=1 SV=1	7.53021	0.302498	1.23328		24.9866	2.24227	0.0710524	0.126776	-5.45698	0.538836	0.891164	1	0.0710524	0.126776
Tagln	P37804	P37804	Transgelin OS=Mus musculus GN=Tagln PE=1 SV=3	8.10532	0.302455	1.23324		26.7973	1.70864	0.143863	0.220959	-6.17644	0.639561	0.906706	1	0.143863	0.220959
Cyb5r1	Q9DB73	Q9DB73	NADH-cytochrome b5 reductase 1 OS=Mus musculus GN=Cyb5r1 PE=1 SV=1	7.57314	0.302242	1.23306		24.7818	3.42154	0.0166572	0.0442519	-3.88354	0.348349	0.841106	1	0.0166572	0.0442519
Sap130	A0A0R4J060|J3QNK5|Q8BIH0|Q8BIH0-2	Q8BIH0	Histone deacetylase complex subunit SAP130 OS=Mus musculus GN=Sap130 PE=1 SV=1|Histone deacetylase complex subunit SAP130 OS=Mus musculus GN=Sap130 PE=1 SV=1|Histone deacetylase complex subunit SAP130 OS=Mus musculus GN=Sap130 PE=1 SV=2|Isoform 2 of Histone deacetylase complex subunit SAP130 OS=Mus musculus GN=Sap130	7.03528	0.301902	1.23277		24.2521	4.30771	0.00643116	0.0226218	-2.81678	0.237729	0.7832	1	0.00643116	0.0226218
Dmap1	Q9JI44	Q9JI44	DNA methyltransferase 1-associated protein 1 OS=Mus musculus GN=Dmap1 PE=1 SV=1	6.94928	0.301882	1.23275		24.4988	4.9579	0.00344056	0.0148829	-2.10844	0.174181	0.725792	1	0.00344056	0.0148829
Zfp219	Q6IQX8	Q6IQX8	Protein Zfp219 OS=Mus musculus GN=Zfp219 PE=1 SV=1	6.89641	0.300801	1.23183		24.0487	1.4865	0.193053	0.275831	-6.46067	0.683694	0.912199	1	0.193053	0.275831
Zfpm1	O35615	O35615	Zinc finger protein ZFPM1 OS=Mus musculus GN=Zfpm1 PE=1 SV=1	6.63513	0.300631	1.23168		23.7298	3.23044	0.0207811	0.0518903	-4.12862	0.375931	0.851028	1	0.0207811	0.0518903
Tcf25	Q8R3L2|Q8R3L2-2|Q8R3L2-3|Q8R3L2-5	Q8R3L2	Transcription factor 25 OS=Mus musculus GN=Tcf25 PE=1 SV=2|Isoform 2 of Transcription factor 25 OS=Mus musculus GN=Tcf25|Isoform 3 of Transcription factor 25 OS=Mus musculus GN=Tcf25|Isoform 5 of Transcription factor 25 OS=Mus musculus GN=Tcf25	6.41188	0.300273	1.23138		22.7305	3.04538	0.0258853	0.0607092	-4.37052	0.403889	0.859895	1	0.0258853	0.0607092
Mtus1	A0A0R4J1L9|Q5HZI1	Q5HZI1	Microtubule-associated tumor suppressor 1 homolog OS=Mus musculus GN=Mtus1 PE=1 SV=1|Microtubule-associated tumor suppressor 1 homolog OS=Mus musculus GN=Mtus1 PE=1 SV=2	6.69785	0.299852	1.23102		24.914	5.55528	0.00203188	0.0106404	-1.50969	0.127853	0.660194	1	0.00203188	0.0106404
Ephb3	P54754	P54754	Ephrin type-B receptor 3 OS=Mus musculus GN=Ephb3 PE=1 SV=2	6.61973	0.299742	1.23092		23.6826	4.31082	0.00641103	0.0226151	-2.81324	0.237391	0.782957	1	0.00641103	0.0226151
Fem1b	Q9Z2G0	Q9Z2G0	Protein fem-1 homolog B OS=Mus musculus GN=Fem1b PE=1 SV=1	6.79071	0.299373	1.23061		23.915	4.09317	0.0080095	0.026296	-3.06421	0.261914	0.799198	1	0.0080095	0.026296
Sh3bp5l	Q99LH9	Q99LH9	SH3 domain-binding protein 5-like OS=Mus musculus GN=Sh3bp5l PE=1 SV=1	6.227	0.299357	1.2306		23.2284	4.5633	0.00499452	0.0189427	-2.53097	0.211031	0.762291	1	0.00499452	0.0189427
Fanca	Q9JL70	Q9JL70	Fanconi anemia group A protein homolog OS=Mus musculus GN=Fanca PE=2 SV=2	6.11065	0.299326	1.23057		22.2478	4.29753	0.00649745	0.0227998	-2.82835	0.238839	0.783989	1	0.00649745	0.0227998
Mkln1	O89050	O89050	Muskelin OS=Mus musculus GN=Mkln1 PE=1 SV=1	7.1584	0.29921	1.23047		24.9547	2.71	0.0390505	0.0811125	-4.81875	0.457619	0.874277	1	0.0390505	0.0811125
Comtd1	H3BJ37|Q8BIG7	H3BJ37	Catechol O-methyltransferase domain-containing protein 1 OS=Mus musculus GN=Comtd1 PE=1 SV=1|Catechol O-methyltransferase domain-containing protein 1 OS=Mus musculus GN=Comtd1 PE=1 SV=1	7.20224	0.298673	1.23001		24.8881	4.57682	0.00492943	0.0187815	-2.51613	0.209682	0.761127	1	0.00492943	0.0187815
Nucks1	A0A087WRY3|Q80XU3	Q80XU3	Nuclear ubiquitous casein and cyclin-dependent kinase substrate 1 OS=Mus musculus GN=Nucks1 PE=1 SV=1|Nuclear ubiquitous casein and cyclin-dependent kinase substrate 1 OS=Mus musculus GN=Nucks1 PE=1 SV=1	7.71464	0.298634	1.22998		26.4379	2.88165	0.0315746	0.069928	-4.58792	0.429634	0.867175	1	0.0315746	0.069928
Ercc4	D6RHP2|Q9QZD4	D6RHP2	DNA repair endonuclease XPF OS=Mus musculus GN=Ercc4 PE=1 SV=1|DNA repair endonuclease XPF OS=Mus musculus GN=Ercc4 PE=1 SV=3	6.71913	0.29854	1.2299		24.0602	4.90933	0.00359807	0.0152899	-2.15924	0.178438	0.730571	1	0.00359807	0.0152899
Tpd52l2	A2AUD5|Q3TAI4|Q9CYZ2	A2AUD5	Tumor protein D54 OS=Mus musculus GN=Tpd52l2 PE=1 SV=1|Tumor protein D52-like 2, isoform CRA_c OS=Mus musculus GN=Tpd52l2 PE=1 SV=1|Tumor protein D54 OS=Mus musculus GN=Tpd52l2 PE=1 SV=1	7.72653	0.298362	1.22975		25.8063	4.14535	0.00758844	0.0253442	-3.0034	0.255881	0.795433	1	0.00758844	0.0253442
Lrp2	A2ARV4	A2ARV4	Low-density lipoprotein receptor-related protein 2 OS=Mus musculus GN=Lrp2 PE=1 SV=1	6.86819	0.297771	1.22924		24.3819	2.87301	0.0319108	0.0704314	-4.59947	0.431018	0.867545	1	0.0319108	0.0704314
Ptpn14	Q62130	Q62130	Tyrosine-protein phosphatase non-receptor type 14 OS=Mus musculus GN=Ptpn14 PE=1 SV=2	7.22472	0.297623	1.22912		25.3739	4.38238	0.00596752	0.0214584	-2.73227	0.229693	0.777304	1	0.00596752	0.0214584
Actr1a	P61164	P61164	Alpha-centractin OS=Mus musculus GN=Actr1a PE=1 SV=1	7.65663	0.297033	1.22861		25.9495	4.78016	0.00405903	0.0165028	-2.296	0.190137	0.742886	1	0.00405903	0.0165028
Abcb6	Q9DC29	Q9DC29	ATP-binding cassette sub-family B member 6, mitochondrial OS=Mus musculus GN=Abcb6 PE=1 SV=1	7.61983	0.296578	1.22823		26.3538	4.64206	0.00462871	0.0180133	-2.44485	0.203258	0.755425	1	0.00462871	0.0180133
Zfp148|Znf148	Q548L0|Q61624	Q548L0	G-rich box-binding protein Berf-1 OS=Mus musculus GN=Zfp148 PE=1 SV=1|Zinc finger protein 148 OS=Mus musculus GN=Znf148 PE=1 SV=2	7.14352	0.2965	1.22816		24.9592	5.37232	0.00237671	0.0117984	-1.68804	0.140892	0.68163	1	0.00237671	0.0117984
Dpf2	D3Z5N6|Q61103	D3Z5N6	Zinc finger protein ubi-d4 OS=Mus musculus GN=Dpf2 PE=1 SV=1|Zinc finger protein ubi-d4 OS=Mus musculus GN=Dpf2 PE=1 SV=1	6.5521	0.296464	1.22813		23.5162	3.4245	0.016601	0.0441429	-3.87979	0.347933	0.840946	1	0.016601	0.0441429
Mfap3|Mfap3l	A0A0R4J1C7|Q922T2|Q9D3X9|Q9D3X9-2	Q9D3X9	Microfibril-associated glycoprotein 3 OS=Mus musculus GN=Mfap3 PE=1 SV=1|Microfibril-associated glycoprotein 3 OS=Mus musculus GN=Mfap3 PE=2 SV=1|Microfibrillar-associated protein 3-like OS=Mus musculus GN=Mfap3l PE=1 SV=1|Isoform 2 of Microfibrillar-associated protein 3-like OS=Mus musculus GN=Mfap3l	6.34779	0.296324	1.22801		25.0285	2.2949	0.0663426	0.120356	-5.38491	0.529349	0.889429	1	0.0663426	0.120356
Gatad2b	Q8VHR5	Q8VHR5	Transcriptional repressor p66-beta OS=Mus musculus GN=Gatad2b PE=1 SV=1	7.48897	0.295905	1.22765		26.415	4.19863	0.00718429	0.0244291	-2.94172	0.249821	0.791505	1	0.00718429	0.0244291
Bphl	Q8R164	Q8R164	Valacyclovir hydrolase OS=Mus musculus GN=Bphl PE=1 SV=1	7.33362	0.295286	1.22713		24.9365	4.29757	0.00649724	0.0227998	-2.82832	0.238836	0.783987	1	0.00649724	0.0227998
Atp13a3	Q5XF89|Q5XF89-2	Q5XF89	Probable cation-transporting ATPase 13A3 OS=Mus musculus GN=Atp13a3 PE=1 SV=1|Isoform 2 of Probable cation-transporting ATPase 13A3 OS=Mus musculus GN=Atp13a3	6.63753	0.295226	1.22708		24.3653	4.51725	0.0052237	0.0194693	-2.58175	0.215673	0.766212	1	0.0052237	0.0194693
Fth1	P09528	P09528	Ferritin heavy chain OS=Mus musculus GN=Fth1 PE=1 SV=2	6.5765	0.295076	1.22695		22.4124	3.97497	0.0090654	0.0286022	-3.2035	0.275941	0.80744	1	0.0090654	0.0286022
Mtr	A6H5Y3	A6H5Y3	Methionine synthase OS=Mus musculus GN=Mtr PE=1 SV=1	6.78376	0.294674	1.22661		24.3204	3.15197	0.0227946	0.0554194	-4.23066	0.387637	0.854873	1	0.0227946	0.0554194
Igf2r	Q07113	Q07113	Cation-independent mannose-6-phosphate receptor OS=Mus musculus GN=Igf2r PE=1 SV=1	8.10765	0.294555	1.22651		28.4965	3.7527	0.0115087	0.0339197	-3.47116	0.303686	0.8219	1	0.0115087	0.0339197
Dpysl2	O08553	O08553	Dihydropyrimidinase-related protein 2 OS=Mus musculus GN=Dpysl2 PE=1 SV=2	8.12328	0.294392	1.22637		25.8676	2.63302	0.0430136	0.0874399	-4.92309	0.470496	0.877296	1	0.0430136	0.0874399
Dnmt3a	O88508	O88508	DNA (cytosine-5)-methyltransferase 3A OS=Mus musculus GN=Dnmt3a PE=1 SV=2	7.49564	0.293008	1.22519		26.2701	4.25989	0.00674962	0.0233746	-2.87132	0.242978	0.786885	1	0.00674962	0.0233746
Rps6ka3	B1AXN9|P18654	B1AXN9	Ribosomal protein S6 kinase alpha-3 OS=Mus musculus GN=Rps6ka3 PE=1 SV=1|Ribosomal protein S6 kinase alpha-3 OS=Mus musculus GN=Rps6ka3 PE=1 SV=2	7.70214	0.292632	1.22487		26.1209	3.40252	0.0170236	0.0449788	-3.90771	0.351035	0.84213	1	0.0170236	0.0449788
Mex3d	D3YTR3|E9PUA0|Q3UE17|Q3UE17-2	D3YTR3	RNA-binding protein MEX3D OS=Mus musculus GN=Mex3d PE=1 SV=1|RNA-binding protein MEX3D OS=Mus musculus GN=Mex3d PE=1 SV=1|RNA-binding protein MEX3D OS=Mus musculus GN=Mex3d PE=1 SV=2|Isoform 2 of RNA-binding protein MEX3D OS=Mus musculus GN=Mex3d	6.00838	0.292547	1.2248		21.2141	4.81541	0.00392681	0.0162003	-2.25844	0.18689	0.739582	1	0.00392681	0.0162003
Numb	Q9QZS3|Q9QZS3-2|Q9QZS3-3|Q9QZS3-4	Q9QZS3	Protein numb homolog OS=Mus musculus GN=Numb PE=1 SV=1|Isoform 2 of Protein numb homolog OS=Mus musculus GN=Numb|Isoform 3 of Protein numb homolog OS=Mus musculus GN=Numb|Isoform 4 of Protein numb homolog OS=Mus musculus GN=Numb	7.31999	0.292401	1.22468		25.5096	4.78695	0.00403316	0.0164551	-2.28875	0.189508	0.742252	1	0.00403316	0.0164551
Zfp644	E9Q624|E9QA22	E9Q624	Protein Zfp644 OS=Mus musculus GN=Zfp644 PE=1 SV=1|Protein Zfp644 OS=Mus musculus GN=Zfp644 PE=1 SV=1	6.97472	0.2921	1.22442		23.402	4.42368	0.0057276	0.0208923	-2.6859	0.225333	0.773969	1	0.0057276	0.0208923
Gnaq	P21279|Q3UHH5	P21279	Guanine nucleotide-binding protein G(q) subunit alpha OS=Mus musculus GN=Gnaq PE=1 SV=4|Guanine nucleotide-binding protein G(q) subunit alpha OS=Mus musculus GN=Gnaq PE=1 SV=1	7.35369	0.291985	1.22432		25.6328	4.66794	0.00451528	0.0176784	-2.41674	0.20075	0.753123	1	0.00451528	0.0176784
Spn	A0A0U1RNN5|P15702|Q544C5	P15702	Leukosialin (Fragment) OS=Mus musculus GN=Spn PE=1 SV=1|Leukosialin OS=Mus musculus GN=Spn PE=1 SV=1|Leukosialin OS=Mus musculus GN=Spn PE=1 SV=1	6.73325	0.291675	1.22406		23.2146	5.24789	0.00265003	0.0127042	-1.81183	0.150328	0.695529	1	0.00265003	0.0127042
Fbxw11	Q5SRY7|Q5SRY7-2|Q5SRY7-3|Q5SRY7-4	Q5SRY7	F-box/WD repeat-containing protein 11 OS=Mus musculus GN=Fbxw11 PE=1 SV=1|Isoform 2 of F-box/WD repeat-containing protein 11 OS=Mus musculus GN=Fbxw11|Isoform 3 of F-box/WD repeat-containing protein 11 OS=Mus musculus GN=Fbxw11|Isoform 4 of F-box/WD repeat-containing protein 11 OS=Mus musculus GN=Fbxw11	6.32691	0.291533	1.22394		23.1405	3.9308	0.00949993	0.0295881	-3.2561	0.281312	0.81042	1	0.00949993	0.0295881
Pcbp4	A0A0R4J044|P57724	P57724	Poly(rC)-binding protein 4 OS=Mus musculus GN=Pcbp4 PE=1 SV=1|Poly(rC)-binding protein 4 OS=Mus musculus GN=Pcbp4 PE=1 SV=1	6.20861	0.291233	1.22369		23.6658	3.70853	0.0120785	0.0350836	-3.52523	0.309413	0.824618	1	0.0120785	0.0350836
Ap2s1	P62743|Q3UJ76	P62743	AP-2 complex subunit sigma OS=Mus musculus GN=Ap2s1 PE=1 SV=1|AP-2 complex subunit sigma OS=Mus musculus GN=Ap2s1 PE=1 SV=1	6.841	0.290976	1.22347		23.6531	4.65527	0.00457043	0.0178342	-2.43049	0.201976	0.754253	1	0.00457043	0.0178342
Sept10	A0A0R4J233|Q8C650|Q8C650-2	Q8C650	Septin-10 OS=Mus musculus GN=Sept10 PE=1 SV=1|Septin-10 OS=Mus musculus GN=Sept10 PE=1 SV=1|Isoform 2 of Septin-10 OS=Mus musculus GN=Sept10	7.4998	0.290594	1.22314		25.9483	4.31791	0.00636544	0.0225268	-2.80518	0.23662	0.782404	1	0.00636544	0.0225268
Cmas	A0A0R4J0B4	A0A0R4J0B4	Cytidine monophospho-N-acetylneuraminic acid synthetase OS=Mus musculus GN=Cmas PE=1 SV=1	7.43851	0.290163	1.22278		25.4831	1.53643	0.180747	0.262372	-6.39805	0.673671	0.911009	1	0.180747	0.262372
Gata4	Q08369	Q08369	Transcription factor GATA-4 OS=Mus musculus GN=Gata4 PE=1 SV=4	6.64128	0.289574	1.22228		23.1813	3.67612	0.0125169	0.035909	-3.5651	0.31366	0.826581	1	0.0125169	0.035909
Ppm1f	Q8CGA0	Q8CGA0	Protein phosphatase 1F OS=Mus musculus GN=Ppm1f PE=1 SV=1	6.22086	0.288475	1.22135		21.5368	4.79778	0.0039923	0.0163803	-2.2772	0.188508	0.741239	1	0.0039923	0.0163803
Acadvl	P50544	P50544	Very long-chain specific acyl-CoA dehydrogenase, mitochondrial OS=Mus musculus GN=Acadvl PE=1 SV=3	7.64272	0.288471	1.22135		26.8562	3.24199	0.0205019	0.0513473	-4.11367	0.374228	0.850451	1	0.0205019	0.0513473
Nradd	Q8CJ26	Q8CJ26	Death domain-containing membrane protein NRADD OS=Mus musculus GN=Nradd PE=1 SV=1	6.627	0.288447	1.22132		23.5923	3.6405	0.0130195	0.0369139	-3.60908	0.318372	0.828708	1	0.0130195	0.0369139
Adat1	Q9JHI2|Q9JHI2-2	Q9JHI2	tRNA-specific adenosine deaminase 1 OS=Mus musculus GN=Adat1 PE=1 SV=1|Isoform 2 of tRNA-specific adenosine deaminase 1 OS=Mus musculus GN=Adat1	6.68034	0.287479	1.22051		24.2721	3.98588	0.00896161	0.0283516	-3.19056	0.274625	0.806696	1	0.00896161	0.0283516
Nudt19	P11930	P11930	Nucleoside diphosphate-linked moiety X motif 19 OS=Mus musculus GN=Nudt19 PE=1 SV=2	6.50933	0.287357	1.2204		22.8191	4.60963	0.00477549	0.0183842	-2.4802	0.206433	0.758277	1	0.00477549	0.0183842
Fntb	D3YWJ4|Q8K2I1	D3YWJ4	Protein farnesyltransferase subunit beta OS=Mus musculus GN=Fntb PE=1 SV=1|Protein farnesyltransferase subunit beta OS=Mus musculus GN=Fntb PE=1 SV=1	6.31801	0.287249	1.22031		21.0219	3.36679	0.0177366	0.04642	-3.95324	0.356117	0.844032	1	0.0177366	0.04642
Grb2	B1AT92|Q60631	B1AT92	Growth factor receptor-bound protein 2 OS=Mus musculus GN=Grb2 PE=1 SV=1|Growth factor receptor-bound protein 2 OS=Mus musculus GN=Grb2 PE=1 SV=1	8.14018	0.286725	1.21987		27.1355	5.06086	0.00313222	0.014072	-2.00181	0.165408	0.715387	1	0.00313222	0.014072
Arhgef18	Q6P9R4|Q6P9R4-2	Q6P9R4	Rho guanine nucleotide exchange factor 18 OS=Mus musculus GN=Arhgef18 PE=1 SV=2|Isoform 2 of Rho guanine nucleotide exchange factor 18 OS=Mus musculus GN=Arhgef18	7.14671	0.285934	1.2192		25.2192	2.51677	0.0498462	0.0973825	-5.08136	0.490313	0.881668	1	0.0498462	0.0973825
Rgl3	Q3UYI5	Q3UYI5	Ral guanine nucleotide dissociation stimulator-like 3 OS=Mus musculus GN=Rgl3 PE=1 SV=2	6.80264	0.285928	1.21919		24.6415	5.04204	0.00318613	0.0141935	-2.02119	0.166987	0.717317	1	0.00318613	0.0141935
Faah	O08914	O08914	Fatty-acid amide hydrolase 1 OS=Mus musculus GN=Faah PE=1 SV=1	6.71524	0.285271	1.21864		22.2534	3.065	0.0252833	0.0596505	-4.34468	0.400868	0.858988	1	0.0252833	0.0596505
Ccnc	Q3UXL9|Q62447|Q8CAS3	Q3UXL9	Cyclin-C OS=Mus musculus GN=Ccnc PE=1 SV=1|Cyclin-C OS=Mus musculus GN=Ccnc PE=2 SV=4|Cyclin C, isoform CRA_f OS=Mus musculus GN=Ccnc PE=1 SV=1	6.68974	0.284852	1.21829		23.044	4.42646	0.00571185	0.0208491	-2.68278	0.225042	0.773742	1	0.00571185	0.0208491
Nubp1	Q9R060	Q9R060	Cytosolic Fe-S cluster assembly factor NUBP1 OS=Mus musculus GN=Nubp1 PE=1 SV=1	6.83943	0.284815	1.21825		25.2628	2.01772	0.0954524	0.159581	-5.76337	0.580244	0.89814	1	0.0954524	0.159581
Uhrf1bp1	B2KF50	B2KF50	Protein Uhrf1bp1 OS=Mus musculus GN=Uhrf1bp1 PE=1 SV=1	7.02792	0.284717	1.21817		25.3056	4.85413	0.00378727	0.0157945	-2.2174	0.183371	0.735904	1	0.00378727	0.0157945
Rnf216	P58283|P58283-2	P58283	E3 ubiquitin-protein ligase RNF216 OS=Mus musculus GN=Rnf216 PE=1 SV=3|Isoform 2 of E3 ubiquitin-protein ligase RNF216 OS=Mus musculus GN=Rnf216	6.19753	0.284399	1.2179		22.29	5.06519	0.00311996	0.0140386	-1.99735	0.165046	0.714941	1	0.00311996	0.0140386
Ptprj	A2AWF8|A2AWF9|E9Q4S7|Q64455	A2AWF8	Receptor-type tyrosine-protein phosphatase eta OS=Mus musculus GN=Ptprj PE=1 SV=1|Receptor-type tyrosine-protein phosphatase eta OS=Mus musculus GN=Ptprj PE=1 SV=1|Receptor-type tyrosine-protein phosphatase eta OS=Mus musculus GN=Ptprj PE=1 SV=2|Receptor-type tyrosine-protein phosphatase eta OS=Mus musculus GN=Ptprj PE=1 SV=2	6.16404	0.283886	1.21747		21.0806	4.81483	0.00392895	0.0162003	-2.25906	0.186943	0.739637	1	0.00392895	0.0162003
Rttn	Q8R4Y8	Q8R4Y8	Rotatin OS=Mus musculus GN=Rttn PE=1 SV=2	6.24476	0.283489	1.21713		21.2105	2.48669	0.0517992	0.100255	-5.12244	0.495514	0.882764	1	0.0517992	0.100255
Nudt12	Q9DCN1	Q9DCN1	Peroxisomal NADH pyrophosphatase NUDT12 OS=Mus musculus GN=Nudt12 PE=1 SV=1	7.3886	0.283354	1.21702		25.5292	5.11059	0.00299479	0.0136549	-1.95084	0.161292	0.710229	1	0.00299479	0.0136549
Mapre3	Q2UZW7|Q6PER3	Q2UZW7	Microtubule-associated protein OS=Mus musculus GN=Mapre3 PE=1 SV=1|Microtubule-associated protein RP/EB family member 3 OS=Mus musculus GN=Mapre3 PE=1 SV=1	6.64358	0.283345	1.21701		24.0347	4.07963	0.0081231	0.0265209	-3.08007	0.263495	0.800163	1	0.0081231	0.0265209
Sgf29	A0A0U1RNH1|A0A0U1RPT9|Q9DA08	Q9DA08	SAGA-associated factor 29 OS=Mus musculus GN=Sgf29 PE=1 SV=1|SAGA-associated factor 29 OS=Mus musculus GN=Sgf29 PE=1 SV=1|SAGA-associated factor 29 OS=Mus musculus GN=Sgf29 PE=2 SV=1	6.34572	0.283312	1.21699		22.393	5.1839	0.00280467	0.0131065	-1.8763	0.155365	0.702464	1	0.00280467	0.0131065
Snx30	Q8CE50	Q8CE50	Sorting nexin-30 OS=Mus musculus GN=Snx30 PE=1 SV=1	7.20381	0.283067	1.21678		25.7243	5.10387	0.00301293	0.0136947	-1.9577	0.161843	0.71093	1	0.00301293	0.0136947
Mrpl55	Q9CZ83|Q9CZ83-2	Q9CZ83	39S ribosomal protein L55, mitochondrial OS=Mus musculus GN=Mrpl55 PE=1 SV=1|Isoform 2 of 39S ribosomal protein L55, mitochondrial OS=Mus musculus GN=Mrpl55	6.86067	0.282945	1.21668		24.3619	0.678815	0.525258	0.611068	-7.29353	0.852403	0.928331	1	0.525258	0.611068
Mat2b	Q99LB6-2	Q99LB6	Isoform 2 of Methionine adenosyltransferase 2 subunit beta OS=Mus musculus GN=Mat2b	7.14214	0.282931	1.21666		23.8421	5.11061	0.00299472	0.0136549	-1.95081	0.16129	0.710226	1	0.00299472	0.0136549
Pxn	F8VQ28|Q8VI36	F8VQ28	Paxillin OS=Mus musculus GN=Pxn PE=1 SV=1|Paxillin OS=Mus musculus GN=Pxn PE=1 SV=1	7.60074	0.282771	1.21653		26.3804	5.21243	0.00273448	0.0129238	-1.84749	0.153104	0.69939	1	0.00273448	0.0129238
Adam15	O88839|O88839-2|O88839-3	O88839	Disintegrin and metalloproteinase domain-containing protein 15 OS=Mus musculus GN=Adam15 PE=1 SV=2|Isoform 2 of Disintegrin and metalloproteinase domain-containing protein 15 OS=Mus musculus GN=Adam15|Isoform 3 of Disintegrin and metalloproteinase domain-containing protein 15 OS=Mus musculus GN=Adam15	6.68835	0.282072	1.21594		23.4926	4.23954	0.0068906	0.0236286	-2.89465	0.245236	0.788432	1	0.0068906	0.0236286
Abhd10	Q6PE15|Q6PE15-2	Q6PE15	Mycophenolic acid acyl-glucuronide esterase, mitochondrial OS=Mus musculus GN=Abhd10 PE=1 SV=1|Isoform 2 of Mycophenolic acid acyl-glucuronide esterase, mitochondrial OS=Mus musculus GN=Abhd10	6.55903	0.281986	1.21587		23.9319	4.25518	0.00678196	0.023403	-2.87672	0.2435	0.787244	1	0.00678196	0.023403
Lrrc20	Q8CI70	Q8CI70	Leucine-rich repeat-containing protein 20 OS=Mus musculus GN=Lrrc20 PE=1 SV=1	6.23785	0.281163	1.21517		21.5842	2.87874	0.0316874	0.0700445	-4.59181	0.430099	0.8673	1	0.0316874	0.0700445
Pank3	Q5SXA7|Q8R2W9	Q5SXA7	Pantothenate kinase 3 OS=Mus musculus GN=Pank3 PE=1 SV=1|Pantothenate kinase 3 OS=Mus musculus GN=Pank3 PE=2 SV=1	6.23618	0.281038	1.21507		22.2846	2.5484	0.0478782	0.0947755	-5.03823	0.484877	0.8805	1	0.0478782	0.0947755
Ccna2	P51943	P51943	Cyclin-A2 OS=Mus musculus GN=Ccna2 PE=1 SV=2	7.55839	0.280298	1.21445		24.7805	3.9701	0.0091122	0.0286877	-3.20929	0.27653	0.807772	1	0.0091122	0.0286877
Rad18	Q9QXK2	Q9QXK2	E3 ubiquitin-protein ligase RAD18 OS=Mus musculus GN=Rad18 PE=1 SV=2	7.16359	0.280278	1.21443		26.2773	4.13881	0.0076398	0.0255011	-3.011	0.256632	0.795909	1	0.0076398	0.0255011
Tshz1	Q5DTH5	Q5DTH5	Teashirt homolog 1 OS=Mus musculus GN=Tshz1 PE=1 SV=2	6.07534	0.280029	1.21422		21.8756	3.65787	0.0127717	0.0363571	-3.58761	0.316069	0.827675	1	0.0127717	0.0363571
Dbr1	Q923B1	Q923B1	Lariat debranching enzyme OS=Mus musculus GN=Dbr1 PE=1 SV=2	6.86908	0.279944	1.21415		24.9823	5.17904	0.00281683	0.0131422	-1.88122	0.155753	0.702984	1	0.00281683	0.0131422
Gtse1	Q542Q3|Q8R080	Q542Q3	G two S phase expressed protein 1, isoform CRA_a OS=Mus musculus GN=Gtse1 PE=1 SV=1|G2 and S phase-expressed protein 1 OS=Mus musculus GN=Gtse1 PE=1 SV=2	7.2672	0.279876	1.21409		25.7268	3.57368	0.014025	0.0388745	-3.6921	0.327335	0.832613	1	0.014025	0.0388745
Acot8	P58137|Q3U965	P58137	Acyl-coenzyme A thioesterase 8 OS=Mus musculus GN=Acot8 PE=1 SV=1|Acyl-CoA thioesterase 8, isoform CRA_c OS=Mus musculus GN=Acot8 PE=1 SV=1	7.12764	0.279875	1.21409		24.6681	5.05659	0.00314436	0.0140935	-2.0062	0.165765	0.715826	1	0.00314436	0.0140935
Bag3	Q9JLV1	Q9JLV1	BAG family molecular chaperone regulator 3 OS=Mus musculus GN=Bag3 PE=1 SV=2	7.23797	0.279758	1.21399		25.8337	3.91636	0.00964712	0.0299344	-3.27336	0.283084	0.811383	1	0.00964712	0.0299344
Cbx4	O55187	O55187	E3 SUMO-protein ligase CBX4 OS=Mus musculus GN=Cbx4 PE=1 SV=2	6.81446	0.279544	1.21381		23.8365	3.61746	0.0133567	0.0375457	-3.63763	0.321444	0.830067	1	0.0133567	0.0375457
Bag2	Q91YN9	Q91YN9	BAG family molecular chaperone regulator 2 OS=Mus musculus GN=Bag2 PE=1 SV=1	7.67444	0.279244	1.21356		26.3758	4.0118	0.00872034	0.027861	-3.15988	0.271517	0.804915	1	0.00872034	0.027861
Csrp2	P97314	P97314	Cysteine and glycine-rich protein 2 OS=Mus musculus GN=Csrp2 PE=1 SV=3	7.83493	0.278223	1.2127		25.4139	4.79882	0.00398843	0.0163759	-2.2761	0.188413	0.741142	1	0.00398843	0.0163759
Tjp2	Q9Z0U1	Q9Z0U1	Tight junction protein ZO-2 OS=Mus musculus GN=Tjp2 PE=1 SV=2	8.08366	0.278147	1.21264		28.616	5.04098	0.00318918	0.0141935	-2.02228	0.167076	0.717425	1	0.00318918	0.0141935
Ralbp1	Q62172	Q62172	RalA-binding protein 1 OS=Mus musculus GN=Ralbp1 PE=1 SV=4	7.04579	0.277637	1.21221		25.4979	4.63712	0.00465074	0.0180481	-2.45023	0.20374	0.755862	1	0.00465074	0.0180481
Nfat5	Q9WV30|Q9WV30-2|Q9WV30-3|Q9WV30-4	Q9WV30	Nuclear factor of activated T-cells 5 OS=Mus musculus GN=Nfat5 PE=1 SV=2|Isoform 2 of Nuclear factor of activated T-cells 5 OS=Mus musculus GN=Nfat5|Isoform 3 of Nuclear factor of activated T-cells 5 OS=Mus musculus GN=Nfat5|Isoform 4 of Nuclear factor of activated T-cells 5 OS=Mus musculus GN=Nfat5	6.73665	0.277246	1.21188		24.0628	5.03959	0.00319322	0.0141935	-2.02372	0.167193	0.717567	1	0.00319322	0.0141935
Lrpap1	P55302|Q52KI7	P55302	Alpha-2-macroglobulin receptor-associated protein OS=Mus musculus GN=Lrpap1 PE=1 SV=1|Alpha-2-macroglobulin receptor-associated protein OS=Mus musculus GN=Lrpap1 PE=1 SV=1	7.63619	0.277164	1.21181		26.0114	3.17798	0.022104	0.0542393	-4.19675	0.383732	0.853613	1	0.022104	0.0542393
Znf280d|Zfp280d	Q68FE8|Q68FE8-2|Q68FE8-3|V9GWW1|V9GXP2	Q68FE8	Zinc finger protein 280D OS=Mus musculus GN=Znf280d PE=1 SV=1|Isoform 2 of Zinc finger protein 280D OS=Mus musculus GN=Znf280d|Isoform 3 of Zinc finger protein 280D OS=Mus musculus GN=Znf280d|Zinc finger protein 280D OS=Mus musculus GN=Zfp280d PE=1 SV=1|Suppressor of hairy wing homolog 4 (Drosophila), isoform CRA_b OS=Mus musculus GN=Zfp280d PE=1 SV=1	6.33767	0.276904	1.21159		22.2294	2.46123	0.0535159	0.102791	-5.15722	0.499937	0.883681	1	0.0535159	0.102791
Hmgn5	Q9JL35	Q9JL35	High mobility group nucleosome-binding domain-containing protein 5 OS=Mus musculus GN=Hmgn5 PE=1 SV=2	7.22451	0.276298	1.21108		25.9994	2.96601	0.028488	0.0648956	-4.47554	0.416252	0.863488	1	0.028488	0.0648956
Ranbp1	P34022	P34022	Ran-specific GTPase-activating protein OS=Mus musculus GN=Ranbp1 PE=1 SV=2	8.28585	0.276296	1.21108		26.601	3.47543	0.0156662	0.0422754	-3.81535	0.34081	0.83816	1	0.0156662	0.0422754
H2afx	P27661	P27661	Histone H2AX OS=Mus musculus GN=H2afx PE=1 SV=2	8.62914	0.27597	1.21081		26.8667	3.40797	0.0169178	0.0448213	-3.90078	0.350265	0.841838	1	0.0169178	0.0448213
Tmem168	Q91VX9	Q91VX9	Transmembrane protein 168 OS=Mus musculus GN=Tmem168 PE=1 SV=1	7.25286	0.275695	1.21058		25.053	4.52083	0.0052055	0.0194138	-2.5778	0.215311	0.76591	1	0.0052055	0.0194138
Stxbp1	O08599|O08599-2	O08599	Syntaxin-binding protein 1 OS=Mus musculus GN=Stxbp1 PE=1 SV=2|Isoform 2 of Syntaxin-binding protein 1 OS=Mus musculus GN=Stxbp1	7.71166	0.275672	1.21056		26.4661	4.93029	0.00352912	0.0151531	-2.13728	0.176593	0.728519	1	0.00352912	0.0151531
Abl1	P00520|P00520-2|P00520-3|P00520-4	P00520	Tyrosine-protein kinase ABL1 OS=Mus musculus GN=Abl1 PE=1 SV=3|Isoform II of Tyrosine-protein kinase ABL1 OS=Mus musculus GN=Abl1|Isoform III of Tyrosine-protein kinase ABL1 OS=Mus musculus GN=Abl1|Isoform IV of Tyrosine-protein kinase ABL1 OS=Mus musculus GN=Abl1	6.58009	0.274734	1.20977		23.9198	4.1594	0.00747938	0.0250807	-2.98709	0.254273	0.794405	1	0.00747938	0.0250807
Spr	Q64105|Q91XH5	Q64105	Sepiapterin reductase OS=Mus musculus GN=Spr PE=1 SV=1|Sepiapterin reductase OS=Mus musculus GN=Spr PE=1 SV=1	7.68501	0.274463	1.20954		25.5301	3.10122	0.0242119	0.0579213	-4.29708	0.395325	0.857293	1	0.0242119	0.0579213
Strn	O55106	O55106	Striatin OS=Mus musculus GN=Strn PE=1 SV=2	7.3673	0.274323	1.20943		25.3815	3.5455	0.0144751	0.0398374	-3.72731	0.331165	0.834228	1	0.0144751	0.0398374
Lats1	Q8BYR2	Q8BYR2	Serine/threonine-protein kinase LATS1 OS=Mus musculus GN=Lats1 PE=1 SV=3	6.93613	0.273925	1.20909		24.658	4.08706	0.00806052	0.0263694	-3.07136	0.262626	0.799634	1	0.00806052	0.0263694
Usp19	E9Q9M5|J3KMM1|Q3UJD6|Q3UJD6-2	E9Q9M5	Ubiquitin carboxyl-terminal hydrolase 19 OS=Mus musculus GN=Usp19 PE=1 SV=1|Ubiquitin carboxyl-terminal hydrolase 19 OS=Mus musculus GN=Usp19 PE=1 SV=1|Ubiquitin carboxyl-terminal hydrolase 19 OS=Mus musculus GN=Usp19 PE=1 SV=1|Isoform 2 of Ubiquitin carboxyl-terminal hydrolase 19 OS=Mus musculus GN=Usp19	7.70444	0.273853	1.20903		26.1524	3.9555	0.00925415	0.0289933	-3.22666	0.2783	0.808761	1	0.00925415	0.0289933
Rtel1	Q0VGM9|Q0VGM9-2|Q0VGM9-4	Q0VGM9	Regulator of telomere elongation helicase 1 OS=Mus musculus GN=Rtel1 PE=1 SV=2|Isoform 2 of Regulator of telomere elongation helicase 1 OS=Mus musculus GN=Rtel1|Isoform 4 of Regulator of telomere elongation helicase 1 OS=Mus musculus GN=Rtel1	6.24217	0.273537	1.20877		22.4278	1.60787	0.164445	0.245022	-6.3071	0.659433	0.909262	1	0.164445	0.245022
Atg5	Q99J83	Q99J83	Autophagy protein 5 OS=Mus musculus GN=Atg5 PE=1 SV=1	6.79574	0.273516	1.20875		24.5751	4.07349	0.00817515	0.026642	-3.08726	0.264214	0.800598	1	0.00817515	0.026642
Yaf2	Q99LW6	Q99LW6	YY1-associated factor 2 OS=Mus musculus GN=Yaf2 PE=1 SV=1	6.78475	0.273154	1.20845		21.7302	1.17835	0.287961	0.377928	-6.82477	0.746718	0.91901	1	0.287961	0.377928
0610011F06Rik|Q9DCS2	E9Q7K5|G5E8X1|Q9DCS2	G5E8X1	Protein 0610011F06Rik OS=Mus musculus GN=0610011F06Rik PE=1 SV=1|Protein 0610011F06Rik OS=Mus musculus GN=0610011F06Rik PE=1 SV=1|UPF0585 protein C16orf13 homolog OS=Mus musculus PE=1 SV=1	7.57257	0.272936	1.20826		23.6202	2.16058	0.0790728	0.137402	-5.56873	0.553727	0.89378	1	0.0790728	0.137402
Larp1b|Larp2	A0A0A6YXJ7|Q8R3F0	Q8BVS5	Protein Larp1b (Fragment) OS=Mus musculus GN=Larp1b PE=1 SV=1|Larp2 protein OS=Mus musculus GN=Larp2 PE=1 SV=1	6.60301	0.272933	1.20826		23.5228	2.69685	0.0396986	0.0821651	-4.83655	0.459805	0.8748	1	0.0396986	0.0821651
Nr1h2	A0A140LHL9|Q60644|Q8BP65	Q8BP65	Oxysterols receptor LXR-beta (Fragment) OS=Mus musculus GN=Nr1h2 PE=1 SV=1|Oxysterols receptor LXR-beta OS=Mus musculus GN=Nr1h2 PE=1 SV=1|Oxysterols receptor LXR-beta OS=Mus musculus GN=Nr1h2 PE=1 SV=1	5.96919	0.272801	1.20815		21.771	3.24529	0.0204228	0.0511935	-4.1094	0.373742	0.850286	1	0.0204228	0.0511935
Gprc5a	G5E8C3	G5E8C3	G protein-coupled receptor, family C, group 5, member A OS=Mus musculus GN=Gprc5a PE=1 SV=1	8.34204	0.272195	1.20764		27.0123	4.17927	0.00732821	0.0247737	-2.96407	0.252011	0.792942	1	0.00732821	0.0247737
Msrb3	A0A0R4J139|Q8BU85	Q8BU85	Methionine sulfoxide reductase B3 OS=Mus musculus GN=Msrb3 PE=1 SV=1|Methionine-R-sulfoxide reductase B3, mitochondrial OS=Mus musculus GN=Msrb3 PE=1 SV=2	6.67994	0.271937	1.20743		22.473	3.33591	0.0183799	0.0475052	-3.99274	0.360546	0.845652	1	0.0183799	0.0475052
Slc9a3r2	A0A0R4IZX2|Q9JHL1	Q9JHL1	Na(+)/H(+) exchange regulatory cofactor NHE-RF OS=Mus musculus GN=Slc9a3r2 PE=1 SV=1|Na(+)/H(+) exchange regulatory cofactor NHE-RF2 OS=Mus musculus GN=Slc9a3r2 PE=1 SV=2	6.82613	0.27191	1.20741		22.4686	4.25588	0.00677716	0.023402	-2.87592	0.243422	0.787191	1	0.00677716	0.023402
Snx14	G3UX33|G3UXB6|Q8BHY8	G3UX33	Sorting nexin-14 OS=Mus musculus GN=Snx14 PE=1 SV=1|Sorting nexin-14 OS=Mus musculus GN=Snx14 PE=1 SV=1|Sorting nexin-14 OS=Mus musculus GN=Snx14 PE=1 SV=2	6.68315	0.27159	1.20714		23.7153	3.31338	0.0188656	0.0483312	-4.02164	0.363799	0.846821	1	0.0188656	0.0483312
Stxbp4	Q9WV89|Q9WV89-2|Q9WV89-4	Q9WV89	Syntaxin-binding protein 4 OS=Mus musculus GN=Stxbp4 PE=1 SV=1|Isoform 2 of Syntaxin-binding protein 4 OS=Mus musculus GN=Stxbp4|Isoform 4 of Syntaxin-binding protein 4 OS=Mus musculus GN=Stxbp4	6.75418	0.270986	1.20663		24.5833	3.75676	0.0114578	0.033821	-3.4662	0.303163	0.821647	1	0.0114578	0.033821
Rbck1	Q9WUB0	Q9WUB0	RanBP-type and C3HC4-type zinc finger-containing protein 1 OS=Mus musculus GN=Rbck1 PE=1 SV=2	6.85096	0.270748	1.20643		24.1077	3.16932	0.0223313	0.0546586	-4.20803	0.385029	0.854034	1	0.0223313	0.0546586
Nedd8	P29595|Q3UI46	P29595	NEDD8 OS=Mus musculus GN=Nedd8 PE=1 SV=2|NEDD8 OS=Mus musculus GN=Nedd8 PE=1 SV=1	7.27247	0.27057	1.20628		26.0595	2.48255	0.052074	0.10052	-5.12809	0.496231	0.882914	1	0.052074	0.10052
Loxl2	P58022|P58022-2	P58022	Lysyl oxidase homolog 2 OS=Mus musculus GN=Loxl2 PE=1 SV=2|Isoform 2 of Lysyl oxidase homolog 2 OS=Mus musculus GN=Loxl2	6.22637	0.270371	1.20612		23.9918	4.33516	0.00625608	0.0222753	-2.78561	0.234752	0.781052	1	0.00625608	0.0222753
Yeats2	Q3TUF7|Q3TUF7-2|Q3TUF7-3	Q3TUF7	YEATS domain-containing protein 2 OS=Mus musculus GN=Yeats2 PE=1 SV=2|Isoform 2 of YEATS domain-containing protein 2 OS=Mus musculus GN=Yeats2|Isoform 3 of YEATS domain-containing protein 2 OS=Mus musculus GN=Yeats2	6.45385	0.270359	1.20611		24.104	4.79272	0.00401134	0.0164006	-2.2826	0.188975	0.741713	1	0.00401134	0.0164006
Ash2l	E9PU93|Q91X20	E9PU93	Set1/Ash2 histone methyltransferase complex subunit ASH2 OS=Mus musculus GN=Ash2l PE=1 SV=1|Set1/Ash2 histone methyltransferase complex subunit ASH2 OS=Mus musculus GN=Ash2l PE=1 SV=1	7.69982	0.270329	1.20608		26.6629	4.8546	0.00378563	0.0157945	-2.21691	0.183329	0.73586	1	0.00378563	0.0157945
Kdm4b	B0V2M9|Q91VY5|Q91VY5-2	B0V2M9	Lysine-specific demethylase 4B OS=Mus musculus GN=Kdm4b PE=1 SV=1|Lysine-specific demethylase 4B OS=Mus musculus GN=Kdm4b PE=2 SV=1|Isoform 2 of Lysine-specific demethylase 4B OS=Mus musculus GN=Kdm4b	6.38872	0.269855	1.20569		21.9765	3.11225	0.0238957	0.0572826	-4.28261	0.393646	0.856771	1	0.0238957	0.0572826
Ccdc9	D3YW42|G3X927|Q8VC31	D3YW42	Coiled-coil domain-containing protein 9 OS=Mus musculus GN=Ccdc9 PE=1 SV=2|Coiled-coil domain-containing protein 9 OS=Mus musculus GN=Ccdc9 PE=1 SV=1|Coiled-coil domain-containing protein 9 OS=Mus musculus GN=Ccdc9 PE=2 SV=1	7.62276	0.269788	1.20563		26.8893	4.827	0.00388445	0.016088	-2.24614	0.185832	0.738487	1	0.00388445	0.016088
Znf511	Q6P0X2|Q6P0X2-2	Q6P0X2	Zinc finger protein 511 OS=Mus musculus GN=Znf511 PE=2 SV=2|Isoform 2 of Zinc finger protein 511 OS=Mus musculus GN=Znf511	6.48319	0.269484	1.20538		21.7733	4.07004	0.00820459	0.026712	-3.0913	0.264619	0.800842	1	0.00820459	0.026712
Gadd45gip1	Q9CR59	Q9CR59	Growth arrest and DNA damage-inducible proteins-interacting protein 1 OS=Mus musculus GN=Gadd45gip1 PE=1 SV=1	6.84754	0.269105	1.20506		23.3281	1.83903	0.120975	0.192814	-6.00402	0.614226	0.90323	1	0.120975	0.192814
Tram2	Q924Z5	Q924Z5	Translocating chain-associated membrane protein 2 OS=Mus musculus GN=Tram2 PE=1 SV=1	6.88071	0.269061	1.20502		23.9446	3.99076	0.00891561	0.0282676	-3.18478	0.274038	0.806362	1	0.00891561	0.0282676
Rpl36-ps3|Rpl36	A0A140T8K6|Q6ZWZ4	Q6ZWZ4	60S ribosomal protein L36 OS=Mus musculus GN=Rpl36-ps3 PE=3 SV=1|60S ribosomal protein L36 OS=Mus musculus GN=Rpl36 PE=1 SV=1	8.07507	0.268925	1.20491		25.4867	2.11003	0.0845061	0.14469	-5.63775	0.563042	0.895354	1	0.0845061	0.14469
Apip	Q9WVQ5	Q9WVQ5	Methylthioribulose-1-phosphate dehydratase OS=Mus musculus GN=Apip PE=1 SV=1	6.7702	0.268783	1.20479		22.1854	3.64377	0.0129724	0.0368163	-3.60503	0.317937	0.828514	1	0.0129724	0.0368163
Prr5l	A2AVJ5	A2AVJ5	Proline-rich protein 5-like OS=Mus musculus GN=Prr5l PE=1 SV=1	6.33668	0.268467	1.20453		22.8478	3.26164	0.0200362	0.0505729	-4.08827	0.371339	0.849463	1	0.0200362	0.0505729
Tpmt	A0A0R4J018|D3YWK6|D3Z217|D3Z380|O55060	O55060	Thiopurine S-methyltransferase OS=Mus musculus GN=Tpmt PE=1 SV=1|Thiopurine S-methyltransferase (Fragment) OS=Mus musculus GN=Tpmt PE=1 SV=1|Thiopurine S-methyltransferase (Fragment) OS=Mus musculus GN=Tpmt PE=1 SV=1|Thiopurine S-methyltransferase OS=Mus musculus GN=Tpmt PE=1 SV=1|Thiopurine S-methyltransferase OS=Mus musculus GN=Tpmt PE=1 SV=1	7.41508	0.268385	1.20446		24.3264	1.80595	0.126411	0.199334	-6.04807	0.620611	0.90413	1	0.126411	0.199334
Nf1	Q04690|Q04690-2|Q5SYH9	Q04690	Neurofibromin OS=Mus musculus GN=Nf1 PE=1 SV=1|Isoform 1 of Neurofibromin OS=Mus musculus GN=Nf1|Neurofibromin (Fragment) OS=Mus musculus GN=Nf1 PE=1 SV=1	6.96925	0.268339	1.20442		25.7786	4.96546	0.00341676	0.0148247	-2.10055	0.173525	0.72504	1	0.00341676	0.0148247
Rab33b	O35963|Q0PD21	O35963	Ras-related protein Rab-33B OS=Mus musculus GN=Rab33b PE=1 SV=1|RAB33B, member of RAS oncogene family, isoform CRA_a OS=Mus musculus GN=Rab33b PE=1 SV=1	7.28026	0.268334	1.20442		24.667	3.64176	0.0130013	0.0368805	-3.60752	0.318204	0.828633	1	0.0130013	0.0368805
Cc2d1a	E9PX94	E9PX94	Coiled-coil and C2 domain-containing protein 1A OS=Mus musculus GN=Cc2d1a PE=1 SV=2	6.5778	0.268114	1.20423		23.6336	4.68566	0.00443949	0.0174757	-2.39756	0.199047	0.751535	1	0.00443949	0.0174757
Hyi	Q8R1F5	Q8R1F5	Putative hydroxypyruvate isomerase OS=Mus musculus GN=Hyi PE=1 SV=2	6.38864	0.268106	1.20423		23.2115	4.22504	0.00699306	0.0239046	-2.91129	0.246854	0.789527	1	0.00699306	0.0239046
Dnaja3	Q99M87|Q99M87-2	Q99M87	DnaJ homolog subfamily A member 3, mitochondrial OS=Mus musculus GN=Dnaja3 PE=1 SV=1|Isoform 2 of DnaJ homolog subfamily A member 3, mitochondrial OS=Mus musculus GN=Dnaja3	6.93335	0.267828	1.20399		22.372	2.03657	0.0931029	0.156508	-5.73776	0.576711	0.89758	1	0.0931029	0.156508
Ccdc71	Q8VEG0	Q8VEG0	Coiled-coil domain-containing protein 71 OS=Mus musculus GN=Ccdc71 PE=2 SV=1	6.23488	0.267577	1.20378		21.9438	4.84442	0.00382173	0.0158902	-2.22768	0.184249	0.736831	1	0.00382173	0.0158902
Shtn1	Q8K2Q9	Q8K2Q9	Shootin-1 OS=Mus musculus GN=Shtn1 PE=1 SV=1	7.32545	0.267458	1.20368		26.048	3.61581	0.0133813	0.0375535	-3.63968	0.321665	0.830164	1	0.0133813	0.0375535
Foxo1	Q9R1E0	Q9R1E0	Forkhead box protein O1 OS=Mus musculus GN=Foxo1 PE=1 SV=2	6.62392	0.266776	1.20312		22.8975	3.35279	0.0180251	0.0469426	-3.97114	0.358121	0.844769	1	0.0180251	0.0469426
Palm3	A2TJV2	A2TJV2	Paralemmin-3 OS=Mus musculus GN=Palm3 PE=1 SV=1	6.9706	0.266543	1.20292		24.7673	4.83237	0.00386497	0.0160388	-2.24044	0.185342	0.737977	1	0.00386497	0.0160388
Klhl20	Q8VCK5	Q8VCK5	Kelch-like protein 20 OS=Mus musculus GN=Klhl20 PE=2 SV=2	6.43312	0.266061	1.20252		23.8196	2.31115	0.0649564	0.118284	-5.36266	0.526438	0.888886	1	0.0649564	0.118284
Rhbdf1	Q6PIX5	Q6PIX5	Inactive rhomboid protein 1 OS=Mus musculus GN=Rhbdf1 PE=1 SV=2	6.43206	0.265656	1.20218		22.2264	3.76254	0.0113858	0.0336599	-3.45915	0.302419	0.821287	1	0.0113858	0.0336599
Gm7694	J3QNH8	J3QNH8	Protein Gm7694 OS=Mus musculus GN=Gm7694 PE=1 SV=1	5.84463	0.265628	1.20216		21.8015	3.0539	0.025622	0.0601812	-4.35929	0.402576	0.859502	1	0.025622	0.0601812
Wdr13	Q32P16|Q91V09	Q32P16	WD repeat domain 13 OS=Mus musculus GN=Wdr13 PE=1 SV=1|WD repeat-containing protein 13 OS=Mus musculus GN=Wdr13 PE=1 SV=1	6.86628	0.265602	1.20214		24.8547	3.49374	0.0153447	0.0416202	-3.79228	0.338272	0.837144	1	0.0153447	0.0416202
Chmp3	Q9CQ10	Q9CQ10	Charged multivesicular body protein 3 OS=Mus musculus GN=Chmp3 PE=1 SV=3	7.37123	0.265483	1.20204		24.5327	2.79746	0.0350247	0.0750271	-4.7008	0.443233	0.870724	1	0.0350247	0.0750271
Sike1	Q9CPR7	Q9CPR7	Suppressor of IKBKE 1 OS=Mus musculus GN=Sike1 PE=1 SV=1	6.53405	0.264943	1.20159		23.0886	2.10594	0.0849618	0.145256	-5.64333	0.563798	0.895479	1	0.0849618	0.145256
Cdk5rap3	Q99LM2	Q99LM2	CDK5 regulatory subunit-associated protein 3 OS=Mus musculus GN=Cdk5rap3 PE=1 SV=1	7.45296	0.264902	1.20155		25.9618	4.84386	0.00382371	0.0158902	-2.22826	0.184299	0.736884	1	0.00382371	0.0158902
Ube2s	A0A0U1RQ37|Q921J4	Q921J4	MCG20927, isoform CRA_b OS=Mus musculus GN=Ube2s PE=1 SV=1|Ubiquitin-conjugating enzyme E2 S OS=Mus musculus GN=Ube2s PE=1 SV=1	6.55185	0.264776	1.20145		22.6064	2.53461	0.0487255	0.0959665	-5.05702	0.487242	0.881011	1	0.0487255	0.0959665
Smg9	Q9DB90	Q9DB90	Protein SMG9 OS=Mus musculus GN=Smg9 PE=1 SV=1	6.78601	0.264753	1.20143		23.0504	2.75374	0.0369777	0.0778633	-4.75969	0.450393	0.872517	1	0.0369777	0.0778633
Sqrdl	F6ZKZ3|H3BLH2|Q9R112	F6ZKZ3	Sulfide:quinone oxidoreductase, mitochondrial OS=Mus musculus GN=Sqrdl PE=1 SV=1|Sulfide:quinone oxidoreductase, mitochondrial (Fragment) OS=Mus musculus GN=Sqrdl PE=1 SV=1|Sulfide:quinone oxidoreductase, mitochondrial OS=Mus musculus GN=Sqrdl PE=1 SV=3	5.77875	0.264443	1.20117		23.1118	4.82049	0.0039082	0.0161399	-2.25305	0.186426	0.739103	1	0.0039082	0.0161399
Bloc1s4	Q8VED2	Q8VED2	Biogenesis of lysosome-related organelles complex 1 subunit 4 OS=Mus musculus GN=Bloc1s4 PE=1 SV=1	6.70434	0.264404	1.20114		23.0217	3.01912	0.026716	0.0620335	-4.40518	0.407954	0.861097	1	0.026716	0.0620335
Fignl1	Q8BPY9	Q8BPY9	Fidgetin-like protein 1 OS=Mus musculus GN=Fignl1 PE=1 SV=1	6.90632	0.264162	1.20094		24.4068	2.19721	0.0753648	0.132309	-5.51865	0.547025	0.892619	1	0.0753648	0.132309
Toe1	Q9D2E2	Q9D2E2	Target of EGR1 protein 1 OS=Mus musculus GN=Toe1 PE=1 SV=1	7.38242	0.263789	1.20063		25.0068	2.86049	0.0324053	0.0711718	-4.61623	0.433029	0.868079	1	0.0324053	0.0711718
Nrf1	Q99K73	Q99K73	Nrf1 protein OS=Mus musculus GN=Nrf1 PE=1 SV=1	7.03044	0.263708	1.20056		23.149	2.33489	0.0629857	0.115892	-5.33014	0.522199	0.888085	1	0.0629857	0.115892
Ankle2	Q6P1H6	Q6P1H6	Ankyrin repeat and LEM domain-containing protein 2 OS=Mus musculus GN=Ankle2 PE=1 SV=2	6.91299	0.263677	1.20053		25.6259	4.96704	0.00341184	0.0148247	-2.09892	0.173389	0.724884	1	0.00341184	0.0148247
Brwd3	A2AHJ4	A2AHJ4	Bromodomain and WD repeat-containing protein 3 OS=Mus musculus GN=Brwd3 PE=1 SV=1	6.91758	0.263199	1.20014		22.5069	2.76874	0.0362944	0.0770099	-4.73946	0.447929	0.871905	1	0.0362944	0.0770099
Nosip	Q9D6T0	Q9D6T0	Nitric oxide synthase-interacting protein OS=Mus musculus GN=Nosip PE=1 SV=1	6.89045	0.262856	1.19985		24.8354	2.30832	0.0651957	0.118608	-5.36653	0.526944	0.888981	1	0.0651957	0.118608
Pdlim7	Q3TJD7	Q3TJD7	PDZ and LIM domain protein 7 OS=Mus musculus GN=Pdlim7 PE=1 SV=1	7.63292	0.26277	1.19978		25.6512	3.85098	0.0103465	0.0314833	-3.3519	0.291198	0.81567	1	0.0103465	0.0314833
Decr1	Q4FJK0|Q9CQ62	Q4FJK0	2,4-dienoyl-CoA reductase, mitochondrial OS=Mus musculus GN=Decr1 PE=1 SV=1|2,4-dienoyl-CoA reductase, mitochondrial OS=Mus musculus GN=Decr1 PE=1 SV=1	8.01161	0.262465	1.19953		26.1423	1.60863	0.16428	0.244947	-6.30613	0.659284	0.909243	1	0.16428	0.244947
Mlec	D3Z1M3|Q6ZQI3	Q6ZQI3	Malectin OS=Mus musculus GN=Mlec PE=1 SV=2|Malectin OS=Mus musculus GN=Mlec PE=1 SV=2	7.69929	0.262046	1.19918		26.1364	2.67148	0.0409817	0.0841919	-4.87091	0.464038	0.8758	1	0.0409817	0.0841919
Apob	E9Q1Y3|E9Q414	E9Q1Y3	Apolipoprotein B-100 (Fragment) OS=Mus musculus GN=Apob PE=1 SV=1|Apolipoprotein B-100 OS=Mus musculus GN=Apob PE=1 SV=1	6.51504	0.261975	1.19912		23.8035	3.12438	0.0235533	0.0566486	-4.26673	0.391805	0.856195	1	0.0235533	0.0566486
Alkbh3	Q8K1E6	Q8K1E6	Alpha-ketoglutarate-dependent dioxygenase alkB homolog 3 OS=Mus musculus GN=Alkbh3 PE=1 SV=1	6.62516	0.26186	1.19902		22.9606	4.71097	0.00433369	0.0171928	-2.37023	0.19663	0.749248	1	0.00433369	0.0171928
Hira	Q61666	Q61666	Protein HIRA OS=Mus musculus GN=Hira PE=1 SV=3	6.7901	0.261804	1.19898		23.5167	3.4968	0.0152916	0.0414957	-3.78842	0.337849	0.836973	1	0.0152916	0.0414957
Shpk	Q9D5J6	Q9D5J6	Sedoheptulokinase OS=Mus musculus GN=Shpk PE=1 SV=1	6.48901	0.261666	1.19886		22.3577	2.82789	0.0337322	0.0731198	-4.65992	0.43829	0.869456	1	0.0337322	0.0731198
Pla2g15	Q8VEB4	Q8VEB4	Group XV phospholipase A2 OS=Mus musculus GN=Pla2g15 PE=1 SV=1	6.69044	0.261617	1.19882		23.4545	3.671	0.0125877	0.0360458	-3.5714	0.314334	0.826888	1	0.0125877	0.0360458
Nmi	O35309|Q3UJ82	O35309	N-myc-interactor OS=Mus musculus GN=Nmi PE=1 SV=1|N-myc-interactor OS=Mus musculus GN=Nmi PE=1 SV=1	6.81876	0.261616	1.19882		24.5961	3.55961	0.0142478	0.0393235	-3.70967	0.329244	0.833422	1	0.0142478	0.0393235
Hdgfrp2	Q3UMU9|Q3UMU9-3	Q3UMU9	Hepatoma-derived growth factor-related protein 2 OS=Mus musculus GN=Hdgfrp2 PE=1 SV=1|Isoform 3 of Hepatoma-derived growth factor-related protein 2 OS=Mus musculus GN=Hdgfrp2	7.99516	0.261495	1.19872		27.4566	4.82563	0.00388941	0.0160943	-2.24759	0.185956	0.738616	1	0.00388941	0.0160943
Hectd3	Q3U487	Q3U487	E3 ubiquitin-protein ligase HECTD3 OS=Mus musculus GN=Hectd3 PE=1 SV=2	7.09835	0.260984	1.1983		25.3003	4.26004	0.00674862	0.0233746	-2.87116	0.242962	0.786874	1	0.00674862	0.0233746
Sgo2	Q7TSY8	Q7TSY8	Shugoshin 2 OS=Mus musculus GN=Sgo2 PE=1 SV=1	7.26063	0.260861	1.19819		26.2613	3.34438	0.0182009	0.0472105	-3.9819	0.359328	0.84521	1	0.0182009	0.0472105
Kmt2c	F8WI37|Q8BRH4	F8WI37	Histone-lysine N-methyltransferase 2C OS=Mus musculus GN=Kmt2c PE=1 SV=1|Histone-lysine N-methyltransferase 2C OS=Mus musculus GN=Kmt2c PE=1 SV=2	7.1704	0.260135	1.19759		25.7439	2.99636	0.0274601	0.0634986	-4.43529	0.411498	0.862129	1	0.0274601	0.0634986
Hook2	Q7TMK6	Q7TMK6	Protein Hook homolog 2 OS=Mus musculus GN=Hook2 PE=1 SV=3	6.36715	0.26007	1.19754		23.8164	4.01962	0.00864894	0.0277879	-3.15064	0.270583	0.804373	1	0.00864894	0.0277879
Zfp318|Znf318	B0V2M3|Q99PP2	Q99PP2	Zinc finger protein 318 OS=Mus musculus GN=Zfp318 PE=1 SV=1|Zinc finger protein 318 (Fragment) OS=Mus musculus GN=Znf318 PE=1 SV=2	6.36344	0.260032	1.19751		22.6608	3.05846	0.0254821	0.0599494	-4.35328	0.401873	0.859291	1	0.0254821	0.0599494
Fam3c	G3X9I1|G5E911|Q91VU0	G3X9I1	DNA segment, Chr 6, Wayne State University 176, expressed, isoform CRA_a OS=Mus musculus GN=Fam3c PE=1 SV=1|DNA segment, Chr 6, Wayne State University 176, expressed, isoform CRA_f OS=Mus musculus GN=Fam3c PE=1 SV=1|Protein FAM3C OS=Mus musculus GN=Fam3c PE=1 SV=1	7.60953	0.259867	1.19737		25.7247	4.71418	0.0043205	0.0171928	-2.36677	0.196326	0.748956	1	0.0043205	0.0171928
Ppp2r3a	B2RXC8	B2RXC8	3222402P14Rik protein OS=Mus musculus GN=Ppp2r3a PE=1 SV=1	6.52053	0.259523	1.19708		23.821	4.18359	0.00729583	0.0246786	-2.95908	0.251521	0.792622	1	0.00729583	0.0246786
Micu2	Q8CD10	Q8CD10	Calcium uptake protein 2, mitochondrial OS=Mus musculus GN=Micu2 PE=1 SV=2	6.86513	0.258794	1.19648		23.3257	3.82012	0.0106965	0.032239	-3.38919	0.295081	0.817653	1	0.0106965	0.032239
Dhdh	Q9DBB8	Q9DBB8	Trans-1,2-dihydrobenzene-1,2-diol dehydrogenase OS=Mus musculus GN=Dhdh PE=1 SV=1	6.99961	0.258685	1.19639		24.9285	3.52628	0.0147913	0.0405159	-3.75138	0.333792	0.835318	1	0.0147913	0.0405159
N4bp2	F8VQG7	F8VQG7	Protein N4bp2 OS=Mus musculus GN=N4bp2 PE=1 SV=1	6.20443	0.25865	1.19636		23.0476	4.61736	0.00474003	0.0182754	-2.47176	0.205674	0.7576	1	0.00474003	0.0182754
Tap1	P21958|Q3TBA3	P21958	Antigen peptide transporter 1 OS=Mus musculus GN=Tap1 PE=1 SV=3|Antigen peptide transporter 1 OS=Mus musculus GN=Tap1 PE=1 SV=1	7.37889	0.258602	1.19632		25.9636	3.24754	0.0203691	0.0511028	-4.10649	0.37341	0.850173	1	0.0203691	0.0511028
Aurkb	O70126	O70126	Aurora kinase B OS=Mus musculus GN=Aurkb PE=1 SV=2	7.20063	0.258561	1.19629		24.2607	2.70593	0.03925	0.0814395	-4.82426	0.458295	0.874439	1	0.03925	0.0814395
Ing2	Q9ESK4	Q9ESK4	Inhibitor of growth protein 2 OS=Mus musculus GN=Ing2 PE=1 SV=3	6.51811	0.258357	1.19612		23.997	3.91312	0.00968051	0.029974	-3.27724	0.283482	0.811598	1	0.00968051	0.029974
Lactb	B2RWI2|Q9EP89	B2RWI2	Lactamase, beta OS=Mus musculus GN=Lactb PE=1 SV=1|Serine beta-lactamase-like protein LACTB, mitochondrial OS=Mus musculus GN=Lactb PE=1 SV=1	7.4829	0.258289	1.19606		26.7418	3.63841	0.0130497	0.0369489	-3.61167	0.31865	0.828832	1	0.0130497	0.0369489
Pcmtd1	P59913|Q3TGS5	P59913	Protein-L-isoaspartate O-methyltransferase domain-containing protein 1 OS=Mus musculus GN=Pcmtd1 PE=1 SV=1|Protein-L-isoaspartate (D-aspartate) O-methyltransferase domain containing 1 OS=Mus musculus GN=Pcmtd1 PE=1 SV=1	6.3776	0.258276	1.19605		22.7564	4.01901	0.00865447	0.0277879	-3.15136	0.270655	0.804416	1	0.00865447	0.0277879
Sgo1	Q9CXH7	Q9CXH7	Shugoshin 1 OS=Mus musculus GN=Sgo1 PE=2 SV=1	6.2024	0.258149	1.19594		22.6715	4.68771	0.00443081	0.0174651	-2.39534	0.19885	0.751351	1	0.00443081	0.0174651
Nin	E9Q4S3|Q61043|Q61043-2	Q61043	Ninein OS=Mus musculus GN=Nin PE=1 SV=1|Ninein OS=Mus musculus GN=Nin PE=1 SV=3|Isoform 2 of Ninein OS=Mus musculus GN=Nin	6.19988	0.258028	1.19584		22.7987	3.83083	0.0105735	0.0319734	-3.37623	0.293729	0.816968	1	0.0105735	0.0319734
Ddb2	Q99J79	Q99J79	DNA damage-binding protein 2 OS=Mus musculus GN=Ddb2 PE=1 SV=1	6.57485	0.257486	1.19539		22.3496	4.60914	0.00477774	0.0183842	-2.48074	0.206482	0.75832	1	0.00477774	0.0183842
Me1	P06801	P06801	NADP-dependent malic enzyme OS=Mus musculus GN=Me1 PE=1 SV=2	7.79104	0.256967	1.19496		25.8486	4.37825	0.00599218	0.021513	-2.73693	0.230134	0.777635	1	0.00599218	0.021513
Erich1	E9PY43	E9PY43	Protein Erich1 OS=Mus musculus GN=Erich1 PE=1 SV=1	6.63273	0.256893	1.1949		23.1117	3.19536	0.0216556	0.0533866	-4.17413	0.381137	0.852763	1	0.0216556	0.0533866
Paf	Q9CQX4	Q9CQX4	PCNA-associated factor OS=Mus musculus GN=Paf PE=1 SV=1	6.80146	0.256593	1.19465		24.3483	1.32859	0.237363	0.324783	-6.65258	0.715748	0.9158	1	0.237363	0.324783
Rnf40	A0A0X1KG60|Q3U319	Q3U319	E3 ubiquitin-protein ligase BRE1B OS=Mus musculus GN=Rnf40 PE=1 SV=1|E3 ubiquitin-protein ligase BRE1B OS=Mus musculus GN=Rnf40 PE=1 SV=2	7.41089	0.256462	1.19455		26.4036	4.74139	0.00421039	0.0168705	-2.33751	0.193756	0.746471	1	0.00421039	0.0168705
Styx	Q60969|Q60969-2	Q60969	Serine/threonine/tyrosine-interacting protein OS=Mus musculus GN=Styx PE=1 SV=2|Isoform 2 of Serine/threonine/tyrosine-interacting protein OS=Mus musculus GN=Styx	6.3881	0.256345	1.19445		23.0065	2.46552	0.0532224	0.102363	-5.15136	0.49919	0.883527	1	0.0532224	0.102363
Arhgap26	E9QAQ3|Q6ZQ82	E9QAQ3	Rho GTPase-activating protein 26 OS=Mus musculus GN=Arhgap26 PE=1 SV=1|Rho GTPase-activating protein 26 OS=Mus musculus GN=Arhgap26 PE=1 SV=3	6.21967	0.256246	1.19437		21.9184	2.13455	0.0818233	0.140871	-5.60429	0.558514	0.894595	1	0.0818233	0.140871
Smap1	Q91VZ6	Q91VZ6	Stromal membrane-associated protein 1 OS=Mus musculus GN=Smap1 PE=1 SV=1	7.22866	0.256025	1.19418		24.1285	4.6394	0.00464056	0.0180353	-2.44774	0.203518	0.75566	1	0.00464056	0.0180353
Rps25	P62852|Q58EA6	P62852	40S ribosomal protein S25 OS=Mus musculus GN=Rps25 PE=1 SV=1|40S ribosomal protein S25 OS=Mus musculus GN=Rps25 PE=1 SV=1	8.00292	0.255851	1.19404		25.3788	1.91174	0.10984	0.178873	-5.90659	0.600292	0.901206	1	0.10984	0.178873
Ate1	Q4FCQ7|Q9Z2A5|Q9Z2A5-2	Q4FCQ7	Arginyl-tRNA--protein transferase 1 OS=Mus musculus GN=Ate1 PE=1 SV=1|Arginyl-tRNA--protein transferase 1 OS=Mus musculus GN=Ate1 PE=1 SV=2|Isoform ATE1-2 of Arginyl-tRNA--protein transferase 1 OS=Mus musculus GN=Ate1	7.53436	0.255773	1.19398		25.928	4.04443	0.00842702	0.0272683	-3.1214	0.267637	0.802645	1	0.00842702	0.0272683
Otub2	D3Z0Y8|Q9CQX0	D3Z0Y8	Ubiquitin thioesterase OTUB2 OS=Mus musculus GN=Otub2 PE=1 SV=1|Ubiquitin thioesterase OTUB2 OS=Mus musculus GN=Otub2 PE=1 SV=1	6.3457	0.255623	1.19385		23.6017	3.56931	0.0140937	0.0390278	-3.69755	0.327927	0.832865	1	0.0140937	0.0390278
Bcor	Q8CGN4|Q8CGN4-2|Q8CGN4-3|Q8CGN4-4	Q8CGN4	BCL-6 corepressor OS=Mus musculus GN=Bcor PE=1 SV=2|Isoform 2 of BCL-6 corepressor OS=Mus musculus GN=Bcor|Isoform 3 of BCL-6 corepressor OS=Mus musculus GN=Bcor|Isoform 4 of BCL-6 corepressor OS=Mus musculus GN=Bcor	6.53547	0.255563	1.1938		24.1377	2.64265	0.0424947	0.0867184	-4.91002	0.468874	0.876923	1	0.0424947	0.0867184
Dpp7	Q9ET22	Q9ET22	Dipeptidyl peptidase 2 OS=Mus musculus GN=Dpp7 PE=1 SV=2	7.94039	0.255248	1.19354		26.5951	2.92012	0.0301235	0.0676674	-4.53657	0.4235	0.86551	1	0.0301235	0.0676674
Mtmr9	Q9Z2D0	Q9Z2D0	Myotubularin-related protein 9 OS=Mus musculus GN=Mtmr9 PE=1 SV=2	7.16582	0.255224	1.19352		24.1426	3.92082	0.00960134	0.0298241	-3.26802	0.282535	0.811086	1	0.00960134	0.0298241
Arfgef1	G3X9K3	G3X9K3	Brefeldin A-inhibited guanine nucleotide-exchange protein 1 OS=Mus musculus GN=Arfgef1 PE=1 SV=1	7.60299	0.254414	1.19285		26.8812	4.73108	0.00425174	0.0170128	-2.34859	0.194727	0.747416	1	0.00425174	0.0170128
Gcdh	A0A0A0MQ68|Q60759	Q60759	Glutaryl-CoA dehydrogenase, mitochondrial OS=Mus musculus GN=Gcdh PE=1 SV=1|Glutaryl-CoA dehydrogenase, mitochondrial OS=Mus musculus GN=Gcdh PE=1 SV=2	6.80227	0.253913	1.19244		24.6776	2.43593	0.0552826	0.105247	-5.19182	0.504354	0.884582	1	0.0552826	0.105247
Mocs3	A2BDX3	A2BDX3	Adenylyltransferase and sulfurtransferase MOCS3 OS=Mus musculus GN=Mocs3 PE=1 SV=1	7.33419	0.253885	1.19241		25.6038	4.69986	0.00437979	0.0173462	-2.38222	0.197689	0.750255	1	0.00437979	0.0173462
Pmm1	O35621|Q545Q8|Q91W01	O35621	Phosphomannomutase 1 OS=Mus musculus GN=Pmm1 PE=1 SV=1|Phosphomannomutase OS=Mus musculus GN=Pmm1 PE=1 SV=1|Phosphomannomutase OS=Mus musculus GN=Pmm1 PE=1 SV=1	6.48594	0.253793	1.19234		22.6313	1.07643	0.32746	0.419916	-6.93461	0.767969	0.921074	1	0.32746	0.419916
Cdc42ep4	Q9JM96	Q9JM96	Cdc42 effector protein 4 OS=Mus musculus GN=Cdc42ep4 PE=1 SV=1	7.12184	0.253306	1.19194		25.7279	4.24943	0.00682164	0.0234981	-2.8833	0.244137	0.787681	1	0.00682164	0.0234981
Trim25	Q5SU71|Q61510	Q5SU71	E3 ubiquitin/ISG15 ligase TRIM25 OS=Mus musculus GN=Trim25 PE=1 SV=1|E3 ubiquitin/ISG15 ligase TRIM25 OS=Mus musculus GN=Trim25 PE=1 SV=2	7.26277	0.25288	1.19158		25.7996	3.73263	0.0117637	0.0343604	-3.4957	0.30628	0.823141	1	0.0117637	0.0343604
Sco1	Q5SUC9|Q5SUD5	Q5SUC9	Protein SCO1 homolog, mitochondrial OS=Mus musculus GN=Sco1 PE=1 SV=1|Protein SCO1 homolog, mitochondrial OS=Mus musculus GN=Sco1 PE=1 SV=1	7.13039	0.252785	1.1915		24.4194	4.60423	0.00480043	0.0184466	-2.4861	0.206965	0.758748	1	0.00480043	0.0184466
Tfg	Q9Z1A1	Q9Z1A1	Protein Tfg OS=Mus musculus GN=Tfg PE=1 SV=1	8.13584	0.252543	1.19131		26.2771	4.38336	0.00596173	0.0214584	-2.73117	0.22959	0.777226	1	0.00596173	0.0214584
Smad4	P97471	P97471	Mothers against decapentaplegic homolog 4 OS=Mus musculus GN=Smad4 PE=1 SV=2	7.24247	0.252532	1.1913		25.497	3.82713	0.0106158	0.0320511	-3.3807	0.294195	0.817204	1	0.0106158	0.0320511
Polr2m	Q6P6I6	Q6P6I6	DNA-directed RNA polymerase II subunit GRINL1A OS=Mus musculus GN=Polr2m PE=2 SV=2	6.09144	0.252524	1.19129		22.1669	1.99843	0.0979194	0.162799	-5.78953	0.58387	0.898708	1	0.0979194	0.162799
Tap2	P36371|Q792S7	P36371	Antigen peptide transporter 2 OS=Mus musculus GN=Tap2 PE=1 SV=1|Antigen peptide transporter 2 OS=Mus musculus GN=Tap2 PE=1 SV=1	7.46819	0.252239	1.19105		25.2486	4.08765	0.00805562	0.0263694	-3.07068	0.262558	0.799593	1	0.00805562	0.0263694
Vps37a	Q8CHS8|Q8CHS8-3	Q8CHS8	Vacuolar protein sorting-associated protein 37A OS=Mus musculus GN=Vps37a PE=1 SV=1|Isoform 3 of Vacuolar protein sorting-associated protein 37A OS=Mus musculus GN=Vps37a	6.62288	0.252213	1.19103		24.0102	3.65543	0.0128061	0.0364332	-3.59062	0.316391	0.82782	1	0.0128061	0.0364332
Cog1	Q9Z160	Q9Z160	Conserved oligomeric Golgi complex subunit 1 OS=Mus musculus GN=Cog1 PE=1 SV=3	6.98961	0.25221	1.19103		25.1304	2.8517	0.0327573	0.0716743	-4.628	0.434444	0.868452	1	0.0327573	0.0716743
Chmp1a	Q921W0	Q921W0	Charged multivesicular body protein 1a OS=Mus musculus GN=Chmp1a PE=1 SV=1	7.11136	0.252098	1.19094		24.9969	3.09505	0.0243907	0.0582188	-4.30517	0.396265	0.857583	1	0.0243907	0.0582188
D2hgdh	E9QN44|Q8CIM3	E9QN44	D-2-hydroxyglutarate dehydrogenase, mitochondrial OS=Mus musculus GN=D2hgdh PE=1 SV=1|D-2-hydroxyglutarate dehydrogenase, mitochondrial OS=Mus musculus GN=D2hgdh PE=1 SV=3	6.36604	0.251323	1.1903		22.7747	2.64226	0.0425152	0.0867299	-4.91054	0.468939	0.876938	1	0.0425152	0.0867299
Ankmy2	Q3TPE9	Q3TPE9	Ankyrin repeat and MYND domain-containing protein 2 OS=Mus musculus GN=Ankmy2 PE=1 SV=1	7.34395	0.250774	1.18985		26.4953	3.29825	0.0191997	0.0489071	-4.04108	0.365993	0.847599	1	0.0191997	0.0489071
Abca3	Q8R420	Q8R420	ATP-binding cassette sub-family A member 3 OS=Mus musculus GN=Abca3 PE=1 SV=3	6.32292	0.250495	1.18962		23.1358	4.56404	0.00499092	0.0189414	-2.53016	0.210957	0.762227	1	0.00499092	0.0189414
Ankrd50	F7BE84	F7BE84	Protein Ankrd50 (Fragment) OS=Mus musculus GN=Ankrd50 PE=1 SV=1	6.68004	0.250315	1.18947		24.5945	3.09133	0.0244993	0.0583452	-4.31006	0.396834	0.857758	1	0.0244993	0.0583452
Wdyhv1	Q80WB5	Q80WB5	Protein N-terminal glutamine amidohydrolase OS=Mus musculus GN=Wdyhv1 PE=1 SV=1	6.71247	0.250245	1.18941		23.4393	2.01981	0.0951886	0.159277	-5.76052	0.579852	0.898078	1	0.0951886	0.159277
Dnajb11	Q99KV1	Q99KV1	DnaJ homolog subfamily B member 11 OS=Mus musculus GN=Dnajb11 PE=1 SV=1	7.65974	0.250171	1.18935		25.7232	3.68259	0.0124279	0.0357143	-3.55712	0.312809	0.826191	1	0.0124279	0.0357143
Cgrrf1	Q8BMJ7	Q8BMJ7	Cell growth regulator with RING finger domain protein 1 OS=Mus musculus GN=Cgrrf1 PE=2 SV=1	6.66348	0.250035	1.18924		22.8862	3.69325	0.0122829	0.0353706	-3.544	0.31141	0.825547	1	0.0122829	0.0353706
Alms1	Q8K4E0	Q8K4E0	Alstrom syndrome protein 1 homolog OS=Mus musculus GN=Alms1 PE=1 SV=2	6.25356	0.249923	1.18914		25.1481	3.12979	0.0234023	0.056402	-4.25964	0.390985	0.855937	1	0.0234023	0.056402
Nop10	Q9CQS2	Q9CQS2	H/ACA ribonucleoprotein complex subunit 3 OS=Mus musculus GN=Nop10 PE=3 SV=1	6.77402	0.249909	1.18913		22.7632	3.50892	0.0150838	0.0410851	-3.77319	0.336178	0.836295	1	0.0150838	0.0410851
Ckap2l	Q7TS74	Q7TS74	Cytoskeleton-associated protein 2-like OS=Mus musculus GN=Ckap2l PE=1 SV=1	6.99618	0.249788	1.18903		25.3064	3.07162	0.0250836	0.0593238	-4.33597	0.399852	0.85868	1	0.0250836	0.0593238
Atp11b	A0A0G2JE89|Q6DFW5	Q6DFW5	Phospholipid-transporting ATPase (Fragment) OS=Mus musculus GN=Atp11b PE=1 SV=1|Phospholipid-transporting ATPase OS=Mus musculus GN=Atp11b PE=1 SV=1	6.92088	0.249746	1.189		24.7787	4.63588	0.00465628	0.0180481	-2.45157	0.203861	0.755971	1	0.00465628	0.0180481
Pcyt1a	P49586	P49586	Choline-phosphate cytidylyltransferase A OS=Mus musculus GN=Pcyt1a PE=1 SV=1	7.81812	0.249293	1.18862		26.0286	4.02031	0.00864269	0.0277879	-3.14982	0.270501	0.804326	1	0.00864269	0.0277879
Clk3	O35492	O35492	Dual specificity protein kinase CLK3 OS=Mus musculus GN=Clk3 PE=1 SV=2	6.57011	0.248994	1.18838		23.2238	4.33779	0.00623961	0.0222439	-2.78264	0.234469	0.780845	1	0.00623961	0.0222439
Eif4enif1	Q9EST3	Q9EST3	Eukaryotic translation initiation factor 4E transporter OS=Mus musculus GN=Eif4enif1 PE=1 SV=2	7.12759	0.248888	1.18829		25.3207	2.72797	0.0381839	0.0797968	-4.79447	0.454642	0.873558	1	0.0381839	0.0797968
Hacl1	D3YZ54|Q9QXE0	D3YZ54	2-hydroxyacyl-CoA lyase 1 OS=Mus musculus GN=Hacl1 PE=1 SV=2|2-hydroxyacyl-CoA lyase 1 OS=Mus musculus GN=Hacl1 PE=1 SV=2	6.93014	0.248791	1.18821		23.9732	1.15806	0.29548	0.386142	-6.84712	0.750935	0.919428	1	0.29548	0.386142
Cog7	A0A0R4J0Q9|Q3TR20|Q3UM29	Q3TR20	Conserved oligomeric Golgi complex subunit 7 OS=Mus musculus GN=Cog7 PE=1 SV=1|Conserved oligomeric Golgi complex subunit 7 OS=Mus musculus GN=Cog7 PE=1 SV=1|Conserved oligomeric Golgi complex subunit 7 OS=Mus musculus GN=Cog7 PE=1 SV=1	6.60314	0.248547	1.18801		24.3719	3.7983	0.010952	0.0327097	-3.41564	0.297847	0.81904	1	0.010952	0.0327097
Yars2	Q8BYL4	Q8BYL4	Tyrosine--tRNA ligase, mitochondrial OS=Mus musculus GN=Yars2 PE=1 SV=2	7.45997	0.248495	1.18797		25.2143	4.5147	0.00523677	0.0195037	-2.58458	0.215933	0.766427	1	0.00523677	0.0195037
Kif1c	E9Q9B0|O35071	E9Q9B0	Kinesin-like protein KIF1C OS=Mus musculus GN=Kif1c PE=1 SV=1|Kinesin-like protein KIF1C OS=Mus musculus GN=Kif1c PE=1 SV=2	6.92373	0.248396	1.18789		25.3648	4.45756	0.00553896	0.0203573	-2.64803	0.2218	0.771192	1	0.00553896	0.0203573
Coil	E9Q284|Q5SU73	E9Q284	Coilin OS=Mus musculus GN=Coil PE=1 SV=1|Coilin OS=Mus musculus GN=Coil PE=1 SV=1	6.81825	0.248067	1.18761		25.0088	2.86528	0.0322149	0.0709949	-4.60981	0.432258	0.867875	1	0.0322149	0.0709949
Dhodh	O35435	O35435	Dihydroorotate dehydrogenase (quinone), mitochondrial OS=Mus musculus GN=Dhodh PE=1 SV=2	7.00638	0.24683	1.1866		24.5318	2.46792	0.0530593	0.102117	-5.14809	0.498773	0.883441	1	0.0530593	0.102117
R3hcc1l	E0CZA8|Q8BJM3	E0CZA8	Coiled-coil domain-containing protein R3HCC1L (Fragment) OS=Mus musculus GN=R3hcc1l PE=1 SV=1|Coiled-coil domain-containing protein R3HCC1L OS=Mus musculus GN=R3hcc1l PE=1 SV=1	6.7218	0.246724	1.18651		22.9148	2.12802	0.082529	0.141889	-5.61321	0.559718	0.894798	1	0.082529	0.141889
Nip7	E9Q109|Q9CXK8	E9Q109	60S ribosome subunit biogenesis protein NIP7 homolog OS=Mus musculus GN=Nip7 PE=1 SV=1|60S ribosome subunit biogenesis protein NIP7 homolog OS=Mus musculus GN=Nip7 PE=1 SV=1	8.03414	0.246266	1.18613		23.275	4.53609	0.00512853	0.0192502	-2.56094	0.213766	0.764616	1	0.00512853	0.0192502
Snip1	Q8BIZ6	Q8BIZ6	Smad nuclear-interacting protein 1 OS=Mus musculus GN=Snip1 PE=1 SV=1	7.09852	0.246129	1.18602		24.6455	4.13161	0.0076968	0.0256325	-3.01937	0.25746	0.796432	1	0.0076968	0.0256325
Sfr1	Q8BP27|Q8BP27-2	Q8BP27	Swi5-dependent recombination DNA repair protein 1 homolog OS=Mus musculus GN=Sfr1 PE=1 SV=2|Isoform 2 of Swi5-dependent recombination DNA repair protein 1 homolog OS=Mus musculus GN=Sfr1	7.95686	0.246125	1.18602		25.6378	2.31259	0.0648348	0.118272	-5.36068	0.52618	0.888837	1	0.0648348	0.118272
Mad2l1bp	Q9DCX1	Q9DCX1	MAD2L1-binding protein OS=Mus musculus GN=Mad2l1bp PE=1 SV=2	6.59817	0.24599	1.18591		23.4781	4.20522	0.00713603	0.0242792	-2.93412	0.249078	0.791013	1	0.00713603	0.0242792
Lamp2	P17047|P17047-2|P17047-3	P17047	Lysosome-associated membrane glycoprotein 2 OS=Mus musculus GN=Lamp2 PE=1 SV=2|Isoform LAMP-2B of Lysosome-associated membrane glycoprotein 2 OS=Mus musculus GN=Lamp2|Isoform LAMP-2C of Lysosome-associated membrane glycoprotein 2 OS=Mus musculus GN=Lamp2	7.90752	0.245731	1.18569		25.842	3.13452	0.0232712	0.0561791	-4.25346	0.39027	0.855711	1	0.0232712	0.0561791
Cenpi	Q8K1K4	Q8K1K4	Centromere protein I OS=Mus musculus GN=Cenpi PE=2 SV=1	6.09983	0.245501	1.1855		21.9501	4.36488	0.00607268	0.0217555	-2.75201	0.23156	0.778702	1	0.00607268	0.0217555
Zbtb33	A2A3Z2|A2A3Z3|Q8BN78	A2A3Z2	Transcriptional regulator Kaiso (Fragment) OS=Mus musculus GN=Zbtb33 PE=1 SV=1|Transcriptional regulator Kaiso OS=Mus musculus GN=Zbtb33 PE=1 SV=1|Transcriptional regulator Kaiso OS=Mus musculus GN=Zbtb33 PE=1 SV=1	5.72505	0.244574	1.18474		20.8561	3.50703	0.0151159	0.0411338	-3.77556	0.336438	0.836401	1	0.0151159	0.0411338
Edf1	Q9JMG1	Q9JMG1	Endothelial differentiation-related factor 1 OS=Mus musculus GN=Edf1 PE=1 SV=1	7.40793	0.244546	1.18472		24.8425	1.6555	0.15438	0.233331	-6.24566	0.650009	0.908067	1	0.15438	0.233331
Rab28	Q3TWY9|Q99KL7	Q3TWY9	Rab28 OS=Mus musculus GN=Rab28 PE=1 SV=1|Ras-related protein Rab-28 OS=Mus musculus GN=Rab28 PE=1 SV=1	6.26456	0.244464	1.18465		21.2107	1.71681	0.142308	0.218919	-6.16573	0.637959	0.906493	1	0.142308	0.218919
Hn1	P97825	P97825	Hematological and neurological expressed 1 protein OS=Mus musculus GN=Hn1 PE=1 SV=3	7.04184	0.244454	1.18464		24.2615	2.94987	0.0290519	0.065922	-4.49698	0.418793	0.864204	1	0.0290519	0.065922
Ift172	Q6VH22	Q6VH22	Intraflagellar transport protein 172 homolog OS=Mus musculus GN=Ift172 PE=1 SV=1	5.74961	0.24435	1.18456		20.4231	1.55188	0.177097	0.258233	-6.37853	0.670583	0.910636	1	0.177097	0.258233
Psme2|PSME2b	P97372|Q5SVP3	P97372	Proteasome activator complex subunit 2 OS=Mus musculus GN=Psme2 PE=1 SV=4|MCG22048, isoform CRA_c OS=Mus musculus GN=PSME2b PE=1 SV=1	8.22126	0.244349	1.18456		26.6378	3.08639	0.0246443	0.0586446	-4.31654	0.397588	0.85799	1	0.0246443	0.0586446
Hip1r	Q9JKY5	Q9JKY5	Huntingtin-interacting protein 1-related protein OS=Mus musculus GN=Hip1r PE=1 SV=2	7.24989	0.244335	1.18455		25.0388	3.38113	0.0174466	0.0458673	-3.93495	0.354073	0.843272	1	0.0174466	0.0458673
Stam2	O88811|O88811-2	O88811	Signal transducing adapter molecule 2 OS=Mus musculus GN=Stam2 PE=1 SV=1|Isoform 2 of Signal transducing adapter molecule 2 OS=Mus musculus GN=Stam2	6.71857	0.24431	1.18453		24.2226	4.56429	0.0049897	0.0189414	-2.52988	0.210932	0.762206	1	0.0049897	0.0189414
Fam65a	Q68FE6	Q68FE6	Protein FAM65A OS=Mus musculus GN=Fam65a PE=1 SV=2	6.93177	0.244297	1.18452		24.4512	2.48082	0.0521896	0.10066	-5.13046	0.496531	0.882977	1	0.0521896	0.10066
Senp6	F6Z9A1|H3BK32|Q6P7W0|Q6P7W0-2	F6Z9A1	Sentrin-specific protease 6 OS=Mus musculus GN=Senp6 PE=1 SV=2|Sentrin-specific protease 6 (Fragment) OS=Mus musculus GN=Senp6 PE=1 SV=1|Sentrin-specific protease 6 OS=Mus musculus GN=Senp6 PE=1 SV=3|Isoform 2 of Sentrin-specific protease 6 OS=Mus musculus GN=Senp6	6.5172	0.244241	1.18447		24.0368	3.66887	0.0126173	0.0360726	-3.57403	0.314615	0.827016	1	0.0126173	0.0360726
Lcmt2	Q8BYR1|Q8BYR1-2	Q8BYR1	tRNA wybutosine-synthesizing protein 4 OS=Mus musculus GN=Lcmt2 PE=2 SV=4|Isoform 2 of tRNA wybutosine-synthesizing protein 4 OS=Mus musculus GN=Lcmt2	5.80009	0.244073	1.18433		22.3668	1.5983	0.166545	0.24731	-6.31938	0.661335	0.909499	1	0.166545	0.24731
Gtf2h4	E0CXV5|O70422|Q542U3	E0CXV5	General transcription factor IIH subunit 4 (Fragment) OS=Mus musculus GN=Gtf2h4 PE=1 SV=1|General transcription factor IIH subunit 4 OS=Mus musculus GN=Gtf2h4 PE=1 SV=1|General transcription factor IIH subunit 4 OS=Mus musculus GN=Gtf2h4 PE=1 SV=1	6.65485	0.243882	1.18417		23.1521	2.60462	0.0445834	0.0899398	-4.96167	0.475295	0.878384	1	0.0445834	0.0899398
Itpa	Q60I30|Q9D892	Q60I30	Inosine triphosphate pyrophosphatase OS=Mus musculus GN=Itpa PE=1 SV=1|Inosine triphosphate pyrophosphatase OS=Mus musculus GN=Itpa PE=1 SV=2	7.05263	0.243824	1.18413		23.6491	3.51983	0.0148993	0.0407158	-3.75948	0.334678	0.835682	1	0.0148993	0.0407158
Mkrn2	Q9ERV1	Q9ERV1	Probable E3 ubiquitin-protein ligase makorin-2 OS=Mus musculus GN=Mkrn2 PE=1 SV=2	6.58551	0.243598	1.18394		23.6588	3.83977	0.0104721	0.0317491	-3.36542	0.292604	0.816393	1	0.0104721	0.0317491
Vipas39	Q8BGQ1|Q8BGQ1-2	Q8BGQ1	Spermatogenesis-defective protein 39 homolog OS=Mus musculus GN=Vipas39 PE=1 SV=1|Isoform 2 of Spermatogenesis-defective protein 39 homolog OS=Mus musculus GN=Vipas39	7.10691	0.243334	1.18372		25.6093	4.38561	0.00594837	0.0214554	-2.72864	0.229351	0.777045	1	0.00594837	0.0214554
Esx1	A2AG22|O88933	A2AG22	Protein Esx1 OS=Mus musculus GN=Esx1 PE=1 SV=1|Homeobox protein SPX1 OS=Mus musculus GN=Esx1 PE=1 SV=1	7.01422	0.242902	1.18337		23.8838	2.82879	0.0336948	0.0730933	-4.65872	0.438144	0.869418	1	0.0336948	0.0730933
Bre	Q8K3W0	Q8K3W0	BRCA1-A complex subunit BRE OS=Mus musculus GN=Bre PE=1 SV=2	6.7063	0.242519	1.18306		22.9368	3.61275	0.0134269	0.0376107	-3.64347	0.322074	0.830343	1	0.0134269	0.0376107
Dhrs13	Q5SS80	Q5SS80	Dehydrogenase/reductase SDR family member 13 OS=Mus musculus GN=Dhrs13 PE=1 SV=1	6.87375	0.242267	1.18285		23.794	3.63821	0.0130526	0.0369489	-3.61191	0.318676	0.828844	1	0.0130526	0.0369489
Flot2	Q5SS83|Q60634|Q60634-2|Q60634-3	Q5SS83	Flotillin 2, isoform CRA_a OS=Mus musculus GN=Flot2 PE=1 SV=1|Flotillin-2 OS=Mus musculus GN=Flot2 PE=1 SV=2|Isoform 2 of Flotillin-2 OS=Mus musculus GN=Flot2|Isoform 3 of Flotillin-2 OS=Mus musculus GN=Flot2	7.3645	0.242113	1.18272		25.5379	4.0639	0.00825728	0.0268535	-3.09851	0.26534	0.801276	1	0.00825728	0.0268535
Sorbs1	E9QNA7|Q62417-2	E9QNA7	Sorbin and SH3 domain-containing protein 1 OS=Mus musculus GN=Sorbs1 PE=1 SV=1|Isoform 2 of Sorbin and SH3 domain-containing protein 1 OS=Mus musculus GN=Sorbs1	7.00153	0.241715	1.1824		25.2911	2.98548	0.0278238	0.0641357	-4.44971	0.413199	0.862618	1	0.0278238	0.0641357
Rad51ap1	A0A0R4J1G4|A0A0R4J1H1|Q8C551	Q8C551	RAD51-associated protein 1 OS=Mus musculus GN=Rad51ap1 PE=1 SV=1|RAD51-associated protein 1 OS=Mus musculus GN=Rad51ap1 PE=1 SV=1|RAD51-associated protein 1 OS=Mus musculus GN=Rad51ap1 PE=1 SV=2	6.53209	0.241441	1.18217		22.9544	2.60833	0.0443751	0.0896127	-4.95664	0.474667	0.878242	1	0.0443751	0.0896127
Crip2	Q4FJU3|Q9DCT8	Q4FJU3	Crip2 protein OS=Mus musculus GN=Crip2 PE=1 SV=1|Cysteine-rich protein 2 OS=Mus musculus GN=Crip2 PE=1 SV=1	8.35495	0.241385	1.18213		26.9275	3.85438	0.0103087	0.0314202	-3.34779	0.290771	0.815449	1	0.0103087	0.0314202
Rpl29	P47915|Q5M8M8	P47915	60S ribosomal protein L29 OS=Mus musculus GN=Rpl29 PE=2 SV=2|60S ribosomal protein L29 OS=Mus musculus GN=Rpl29 PE=2 SV=1	8.78321	0.240931	1.18175		26.1609	1.6139	0.163137	0.243787	-6.29936	0.658238	0.909112	1	0.163137	0.243787
Cst12	E9Q1S9|Q9DAN8	E9Q1S9	Cystatin OS=Mus musculus GN=Cst12 PE=1 SV=1|Cystatin-12 OS=Mus musculus GN=Cst12 PE=1 SV=1	6.78815	0.240775	1.18163		22.2835	1.88556	0.113724	0.183535	-5.94176	0.605292	0.901942	1	0.113724	0.183535
Trp53bp2|Tp53bp2	E9QJU8|Q8CG79	E9QJU8	Apoptosis-stimulating of p53 protein 2 OS=Mus musculus GN=Trp53bp2 PE=1 SV=1|Apoptosis-stimulating of p53 protein 2 OS=Mus musculus GN=Tp53bp2 PE=1 SV=3	7.07422	0.240667	1.18154		25.6627	2.5499	0.0477871	0.094663	-5.03619	0.48462	0.880444	1	0.0477871	0.094663
Abcf3	Q8K268	Q8K268	ATP-binding cassette sub-family F member 3 OS=Mus musculus GN=Abcf3 PE=1 SV=1	7.50826	0.240646	1.18152		26.2917	4.09176	0.0080212	0.0263063	-3.06586	0.262077	0.799299	1	0.0080212	0.0263063
Tor1aip2	Q8BYU6|Q9ER81	Q8BYU6	Torsin-1A-interacting protein 2 OS=Mus musculus GN=Tor1aip2 PE=1 SV=1|Torsin-1A-interacting protein 2, isoform IFRG15 OS=Mus musculus GN=Tor1aip2 PE=1 SV=1	7.16026	0.240256	1.1812		25.1546	2.58677	0.0456024	0.0912595	-4.98597	0.478327	0.879061	1	0.0456024	0.0912595
Rprd1a	Q8VDS4	Q8VDS4	Regulation of nuclear pre-mRNA domain-containing protein 1A OS=Mus musculus GN=Rprd1a PE=1 SV=1	6.35033	0.240141	1.18111		22.7953	3.865	0.0101919	0.0311266	-3.33501	0.289445	0.81476	1	0.0101919	0.0311266
Wash1	Q8VDD8	Q8VDD8	WAS protein family homolog 1 OS=Mus musculus GN=Wash1 PE=1 SV=1	7.05443	0.239975	1.18097		25.4496	4.19613	0.0072027	0.0244531	-2.9446	0.250103	0.791691	1	0.0072027	0.0244531
Tm9sf2	P58021|Q542E4	P58021	Transmembrane 9 superfamily member 2 OS=Mus musculus GN=Tm9sf2 PE=1 SV=1|Transmembrane 9 superfamily member OS=Mus musculus GN=Tm9sf2 PE=1 SV=1	7.95806	0.239958	1.18096		25.8957	3.33241	0.0184545	0.0476133	-3.99723	0.361051	0.845834	1	0.0184545	0.0476133
Tigar	B2RWB7|Q8BZA9	B2RWB7	9630033F20Rik protein OS=Mus musculus GN=Tigar PE=1 SV=1|Fructose-2,6-bisphosphatase TIGAR OS=Mus musculus GN=Tigar PE=1 SV=1	6.96846	0.239737	1.18078		23.0219	2.80734	0.0345994	0.074525	-4.68753	0.441626	0.870314	1	0.0345994	0.074525
Gna13	P27601	P27601	Guanine nucleotide-binding protein subunit alpha-13 OS=Mus musculus GN=Gna13 PE=1 SV=1	7.65366	0.2397	1.18075		25.923	3.58323	0.0138761	0.0385353	-3.68019	0.326045	0.832062	1	0.0138761	0.0385353
Cbll1	A0A087WPK1|E9QM14|Q9JIY2	E9QM14	E3 ubiquitin-protein ligase Hakai (Fragment) OS=Mus musculus GN=Cbll1 PE=1 SV=5|E3 ubiquitin-protein ligase Hakai OS=Mus musculus GN=Cbll1 PE=1 SV=1|E3 ubiquitin-protein ligase Hakai OS=Mus musculus GN=Cbll1 PE=1 SV=1	6.83551	0.239441	1.18054		23.7877	3.69877	0.0122086	0.0352505	-3.53722	0.310688	0.825212	1	0.0122086	0.0352505
Terf2	D3YZ08|E9QM06|O35144	D3YZ08	Telomeric repeat-binding factor 2 OS=Mus musculus GN=Terf2 PE=1 SV=1|Telomeric repeat-binding factor 2 OS=Mus musculus GN=Terf2 PE=1 SV=1|Telomeric repeat-binding factor 2 OS=Mus musculus GN=Terf2 PE=1 SV=3	6.9172	0.239415	1.18051		24.7745	4.48407	0.00539636	0.0199593	-2.61854	0.219065	0.768995	1	0.00539636	0.0199593
Zbtb2	Q3V3W4	Q3V3W4	Protein Zbtb2 OS=Mus musculus GN=Zbtb2 PE=1 SV=1	6.80795	0.239311	1.18043		23.6087	4.30866	0.00642496	0.0226151	-2.81569	0.237625	0.783125	1	0.00642496	0.0226151
Arhgef10	Q8C033|Q8C033-2	Q8C033	Rho guanine nucleotide exchange factor 10 OS=Mus musculus GN=Arhgef10 PE=1 SV=2|Isoform 2 of Rho guanine nucleotide exchange factor 10 OS=Mus musculus GN=Arhgef10	6.85819	0.239188	1.18033		24.4328	2.98369	0.0278842	0.0642156	-4.45208	0.413479	0.862698	1	0.0278842	0.0642156
Mta3	Q3UII8	Q3UII8	Metastasis-associated protein MTA3 OS=Mus musculus GN=Mta3 PE=1 SV=1	7.55095	0.238983	1.18016		25.8698	4.37795	0.00599392	0.021513	-2.73726	0.230165	0.777658	1	0.00599392	0.021513
Rnf114	Q9ET26	Q9ET26	E3 ubiquitin-protein ligase RNF114 OS=Mus musculus GN=Rnf114 PE=1 SV=2	7.70577	0.238939	1.18012		25.6795	2.28451	0.0672461	0.121729	-5.39915	0.531216	0.889775	1	0.0672461	0.121729
Ect2	Q07139|Q07139-2	Q07139	Protein ECT2 OS=Mus musculus GN=Ect2 PE=1 SV=2|Isoform 2 of Protein ECT2 OS=Mus musculus GN=Ect2	6.91894	0.238907	1.1801		25.3823	3.13371	0.0232938	0.0562104	-4.25453	0.390393	0.85575	1	0.0232938	0.0562104
Mios	Q8VE19	Q8VE19	WD repeat-containing protein mio OS=Mus musculus GN=Mios PE=1 SV=2	6.55326	0.238696	1.17993		23.5778	4.10988	0.00787185	0.0260588	-3.0447	0.259971	0.798001	1	0.00787185	0.0260588
Kif22	Q3V300	Q3V300	Kinesin-like protein KIF22 OS=Mus musculus GN=Kif22 PE=2 SV=2	7.30382	0.238659	1.1799		25.7116	3.79607	0.0109785	0.0327722	-3.41835	0.298132	0.819182	1	0.0109785	0.0327722
Mbtd1	Q6P5G3|Q6P5G3-2	Q6P5G3	MBT domain-containing protein 1 OS=Mus musculus GN=Mbtd1 PE=1 SV=1|Isoform 2 of MBT domain-containing protein 1 OS=Mus musculus GN=Mbtd1	6.55418	0.238524	1.17979		23.6692	4.1631	0.00745096	0.0250143	-2.9828	0.25385	0.794133	1	0.00745096	0.0250143
Terf2ip	Q91VL8	Q91VL8	Telomeric repeat-binding factor 2-interacting protein 1 OS=Mus musculus GN=Terf2ip PE=1 SV=1	5.96694	0.238397	1.17968		22.1636	3.94008	0.00940672	0.0293607	-3.24503	0.280178	0.809798	1	0.00940672	0.0293607
Znf652	Q5DU09	Q5DU09	Zinc finger protein 652 OS=Mus musculus GN=Znf652 PE=1 SV=2	6.91986	0.238105	1.17944		24.2659	3.19683	0.0216182	0.0533845	-4.17223	0.380918	0.852691	1	0.0216182	0.0533845
Pdpk1	F2Z3X6|Q9Z2A0	F2Z3X6	3-phosphoinositide-dependent protein kinase 1 OS=Mus musculus GN=Pdpk1 PE=1 SV=1|3-phosphoinositide-dependent protein kinase 1 OS=Mus musculus GN=Pdpk1 PE=1 SV=2	6.98903	0.238074	1.17942		24.7145	1.4855	0.193306	0.275921	-6.46191	0.683894	0.912223	1	0.193306	0.275921
Evi5	E9PWR7|F8VPT6|P97366	E9PWR7	Ecotropic viral integration site 5 protein (Fragment) OS=Mus musculus GN=Evi5 PE=1 SV=1|Ecotropic viral integration site 5 protein OS=Mus musculus GN=Evi5 PE=1 SV=1|Ecotropic viral integration site 5 protein OS=Mus musculus GN=Evi5 PE=1 SV=2	6.31686	0.237858	1.17924		22.9713	3.35963	0.0178835	0.0466993	-3.96239	0.357141	0.844409	1	0.0178835	0.0466993
Triobp	Q99KW3|Q99KW3-1|Q99KW3-2|Q99KW3-4	Q99KW3	TRIO and F-actin-binding protein OS=Mus musculus GN=Triobp PE=1 SV=3|Isoform 1 of TRIO and F-actin-binding protein OS=Mus musculus GN=Triobp|Isoform 2 of TRIO and F-actin-binding protein OS=Mus musculus GN=Triobp|Isoform 4 of TRIO and F-actin-binding protein OS=Mus musculus GN=Triobp	7.24709	0.237762	1.17916		25.9123	4.4264	0.00571218	0.0208491	-2.68285	0.225048	0.773747	1	0.00571218	0.0208491
Zfp36l2	P23949	P23949	Zinc finger protein 36, C3H1 type-like 2 OS=Mus musculus GN=Zfp36l2 PE=1 SV=2	6.67616	0.237687	1.1791		23.8026	2.59141	0.0453349	0.0908885	-4.97964	0.477537	0.878886	1	0.0453349	0.0908885
Suds3	A0A0R4J243|Q8BR65	Q8BR65	Sin3 histone deacetylase corepressor complex component SDS3 OS=Mus musculus GN=Suds3 PE=1 SV=1|Sin3 histone deacetylase corepressor complex component SDS3 OS=Mus musculus GN=Suds3 PE=1 SV=1	6.66886	0.23764	1.17906		22.8816	3.13727	0.0231956	0.0560897	-4.24987	0.389855	0.85558	1	0.0231956	0.0560897
Zc3h4	Q6ZPZ3	Q6ZPZ3	Zinc finger CCCH domain-containing protein 4 OS=Mus musculus GN=Zc3h4 PE=1 SV=2	7.44085	0.237079	1.1786		26.3493	4.19596	0.00720395	0.0244531	-2.9448	0.250122	0.791704	1	0.00720395	0.0244531
Git1	Q5F258|Q68FF6	Q5F258	ARF GTPase-activating protein GIT1 OS=Mus musculus GN=Git1 PE=1 SV=1|ARF GTPase-activating protein GIT1 OS=Mus musculus GN=Git1 PE=1 SV=1	7.66546	0.236839	1.17841		25.7971	4.01976	0.00864773	0.0277879	-3.15048	0.270567	0.804364	1	0.00864773	0.0277879
Esd	H3BJL6|H3BKH6|H3BLJ9|Q9R0P3	H3BJL6	S-formylglutathione hydrolase OS=Mus musculus GN=Esd PE=1 SV=1|S-formylglutathione hydrolase OS=Mus musculus GN=Esd PE=1 SV=1|S-formylglutathione hydrolase OS=Mus musculus GN=Esd PE=1 SV=1|S-formylglutathione hydrolase OS=Mus musculus GN=Esd PE=1 SV=1	8.60115	0.236711	1.1783		26.8082	2.52852	0.0491052	0.0963881	-5.06534	0.48829	0.881236	1	0.0491052	0.0963881
Fam126a	Q6P9N1-3	Q6P9N1	Isoform 3 of Hyccin OS=Mus musculus GN=Fam126a	6.89626	0.236637	1.17824		24.1877	3.08636	0.0246453	0.0586446	-4.31659	0.397593	0.857992	1	0.0246453	0.0586446
Melk	Q61846	Q61846	Maternal embryonic leucine zipper kinase OS=Mus musculus GN=Melk PE=1 SV=2	7.21346	0.236411	1.17806		25.0126	3.68646	0.0123751	0.0355899	-3.55236	0.312301	0.825958	1	0.0123751	0.0355899
Tstd2	Q3U269	Q3U269	Thiosulfate sulfurtransferase/rhodanese-like domain-containing protein 2 OS=Mus musculus GN=Tstd2 PE=2 SV=3	6.46024	0.236375	1.17803		23.3331	2.40398	0.0576038	0.108271	-5.23554	0.509962	0.885706	1	0.0576038	0.108271
Hjurp	E9QKG8	E9QKG8	Holliday junction recognition protein OS=Mus musculus GN=Hjurp PE=1 SV=1	7.39932	0.236338	1.178		25.2667	2.62401	0.043505	0.0882232	-4.93533	0.472016	0.877642	1	0.043505	0.0882232
Papolg	Q6PCL9	Q6PCL9	Poly(A) polymerase gamma OS=Mus musculus GN=Papolg PE=1 SV=1	6.48503	0.236103	1.17781		23.1989	2.94374	0.0292692	0.0663117	-4.50513	0.419761	0.864475	1	0.0292692	0.0663117
Gmppb	Q8BTZ7	Q8BTZ7	Mannose-1-phosphate guanyltransferase beta OS=Mus musculus GN=Gmppb PE=1 SV=1	7.4457	0.235238	1.1771		23.3631	4.13673	0.0076562	0.0255265	-3.01341	0.25687	0.79606	1	0.0076562	0.0255265
Ubap1	Q8BH48|Q8BH48-2	Q8BH48	Ubiquitin-associated protein 1 OS=Mus musculus GN=Ubap1 PE=1 SV=1|Isoform 2 of Ubiquitin-associated protein 1 OS=Mus musculus GN=Ubap1	6.8894	0.235058	1.17695		23.9476	3.70629	0.0121082	0.0351348	-3.52798	0.309705	0.824754	1	0.0121082	0.0351348
Fam98b	Q80VD1	Q80VD1	Protein FAM98B OS=Mus musculus GN=Fam98b PE=1 SV=1	7.60548	0.234896	1.17682		25.3203	4.41936	0.00575219	0.0209688	-2.69074	0.225787	0.77432	1	0.00575219	0.0209688
Cst3	P21460	P21460	Cystatin-C OS=Mus musculus GN=Cst3 PE=1 SV=2	6.09788	0.234557	1.17655		20.6753	1.79133	0.12889	0.201745	-6.06747	0.623442	0.904524	1	0.12889	0.201745
Trip10	Q8CJ53-3|Q8CJ53-4	Q8CJ53	Isoform 3 of Cdc42-interacting protein 4 OS=Mus musculus GN=Trip10|Isoform 4 of Cdc42-interacting protein 4 OS=Mus musculus GN=Trip10	7.55494	0.234124	1.17619		26.2668	3.72455	0.0118682	0.0345938	-3.50559	0.307328	0.823638	1	0.0118682	0.0345938
Mboat7	Q8CHK3	Q8CHK3	Lysophospholipid acyltransferase 7 OS=Mus musculus GN=Mboat7 PE=1 SV=1	7.57651	0.233614	1.17578		25.4219	1.97752	0.100668	0.166105	-5.81784	0.587812	0.899319	1	0.100668	0.166105
Thyn1	Q91YJ3	Q91YJ3	Thymocyte nuclear protein 1 OS=Mus musculus GN=Thyn1 PE=1 SV=1	7.21121	0.233491	1.17568		25.0963	3.60647	0.0135211	0.0378018	-3.65128	0.322916	0.83071	1	0.0135211	0.0378018
Pi4k2a	Q2TBE6	Q2TBE6	Phosphatidylinositol 4-kinase type 2-alpha OS=Mus musculus GN=Pi4k2a PE=1 SV=1	6.98478	0.232894	1.17519		24.4298	4.40078	0.00585926	0.0212261	-2.71158	0.227744	0.775825	1	0.00585926	0.0212261
Gid8	Q9D7M1	Q9D7M1	Glucose-induced degradation protein 8 homolog OS=Mus musculus GN=Gid8 PE=1 SV=1	7.3121	0.232769	1.17509		25.2478	1.9969	0.098117	0.162959	-5.79159	0.584157	0.898753	1	0.098117	0.162959
Ermp1	Q3UVK0	Q3UVK0	Endoplasmic reticulum metallopeptidase 1 OS=Mus musculus GN=Ermp1 PE=1 SV=2	8.07958	0.232737	1.17506		27.5748	3.56741	0.0141238	0.0390552	-3.69992	0.328185	0.832974	1	0.0141238	0.0390552
Xiap	Q60989	Q60989	E3 ubiquitin-protein ligase XIAP OS=Mus musculus GN=Xiap PE=1 SV=2	6.31769	0.23266	1.175		22.963	2.89009	0.0312496	0.0694727	-4.57664	0.428283	0.866812	1	0.0312496	0.0694727
Med25	A0A140LHG7	A0A140LHG7	Mediator of RNA polymerase II transcription subunit 25 OS=Mus musculus GN=Med25 PE=1 SV=1	6.63478	0.232351	1.17475		23.6282	4.08093	0.00811205	0.0264997	-3.07853	0.263342	0.80007	1	0.00811205	0.0264997
Ilvbl	Q8BU33	Q8BU33	Acetolactate synthase-like protein OS=Mus musculus GN=Ilvbl PE=1 SV=1	6.01049	0.232293	1.1747		22.0979	3.16748	0.0223801	0.0547069	-4.21043	0.385306	0.854124	1	0.0223801	0.0547069
Pkn1	P70268|P70268-2	P70268	Serine/threonine-protein kinase N1 OS=Mus musculus GN=Pkn1 PE=1 SV=3|Isoform 2 of Serine/threonine-protein kinase N1 OS=Mus musculus GN=Pkn1	7.23222	0.232161	1.17459		24.3172	3.48523	0.0154932	0.0418872	-3.803	0.339451	0.837617	1	0.0154932	0.0418872
Bmp2k	Q91Z96	Q91Z96	BMP-2-inducible protein kinase OS=Mus musculus GN=Bmp2k PE=1 SV=1	7.28597	0.232026	1.17448		26.0534	1.59562	0.167137	0.247747	-6.32282	0.661868	0.909566	1	0.167137	0.247747
Pdha1	P35486|Q3UFJ3	P35486	Pyruvate dehydrogenase E1 component subunit alpha, somatic form, mitochondrial OS=Mus musculus GN=Pdha1 PE=1 SV=1|Pyruvate dehydrogenase E1 component subunit alpha OS=Mus musculus GN=Pdha1 PE=1 SV=1	8.36555	0.231771	1.17428		26.7571	2.94244	0.0293153	0.0663755	-4.50685	0.419965	0.864531	1	0.0293153	0.0663755
Man2c1	F8WIE1|Q3ZCX9|Q91W89	F8WIE1	Alpha-mannosidase OS=Mus musculus GN=Man2c1 PE=1 SV=1|Alpha-mannosidase OS=Mus musculus GN=Man2c1 PE=1 SV=1|Alpha-mannosidase 2C1 OS=Mus musculus GN=Man2c1 PE=1 SV=1	7.39049	0.231763	1.17427		25.5394	4.03288	0.0085295	0.0275496	-3.135	0.269006	0.803452	1	0.0085295	0.0275496
Prepl	Q8C167|Q8C167-2	Q8C167	Prolyl endopeptidase-like OS=Mus musculus GN=Prepl PE=1 SV=1|Isoform 2 of Prolyl endopeptidase-like OS=Mus musculus GN=Prepl	6.49042	0.231636	1.17417		23.0751	2.97955	0.0280241	0.0643118	-4.45756	0.414126	0.862884	1	0.0280241	0.0643118
Eif2ak2	Q03963	Q03963	Interferon-induced, double-stranded RNA-activated protein kinase OS=Mus musculus GN=Eif2ak2 PE=1 SV=2	7.58664	0.231522	1.17407		25.2643	2.26714	0.068784	0.123896	-5.42292	0.534342	0.890349	1	0.068784	0.123896
Kdsr	Q6GV12|Q8CII3	Q6GV12	3-ketodihydrosphingosine reductase OS=Mus musculus GN=Kdsr PE=1 SV=1|3-ketodihydrosphingosine reductase OS=Mus musculus GN=Kdsr PE=1 SV=2	6.8101	0.230971	1.17362		24.5798	2.83759	0.0333313	0.0726569	-4.64691	0.436721	0.869048	1	0.0333313	0.0726569
Smyd4	Q8BTK5	Q8BTK5	SET and MYND domain-containing protein 4 OS=Mus musculus GN=Smyd4 PE=2 SV=2	6.3412	0.230921	1.17358		22.5313	4.24411	0.00685863	0.0235976	-2.8894	0.244728	0.788086	1	0.00685863	0.0235976
Morc3	A0A0J9YU83|F7BJB9	F7BJB9	MORC family CW-type zinc finger protein 3 OS=Mus musculus GN=Morc3 PE=1 SV=1|MORC family CW-type zinc finger protein 3 OS=Mus musculus GN=Morc3 PE=1 SV=1	6.82816	0.230893	1.17356		24.5044	3.38318	0.0174055	0.0457801	-3.93234	0.353781	0.843163	1	0.0174055	0.0457801
Tada2b	D3YW26|D3Z4Z0	D3YW26	Protein Tada2b OS=Mus musculus GN=Tada2b PE=1 SV=1|MCG49644 OS=Mus musculus GN=Tada2b PE=1 SV=1	6.47911	0.230865	1.17354		23.6465	3.91317	0.00967994	0.029974	-3.27718	0.283475	0.811594	1	0.00967994	0.029974
Brap	Q99MP8|Q99MP8-2	Q99MP8	BRCA1-associated protein OS=Mus musculus GN=Brap PE=1 SV=1|Isoform 2 of BRCA1-associated protein OS=Mus musculus GN=Brap	6.23533	0.23078	1.17347		22.1756	3.72739	0.0118314	0.034521	-3.50211	0.306959	0.823463	1	0.0118314	0.034521
Bub1b	Q9Z1S0	Q9Z1S0	Mitotic checkpoint serine/threonine-protein kinase BUB1 beta OS=Mus musculus GN=Bub1b PE=1 SV=2	7.25892	0.230559	1.17329		26.1178	3.07456	0.0249954	0.0592115	-4.3321	0.3994	0.858543	1	0.0249954	0.0592115
Rtn3	Q9ES97|Q9ES97-2|Q9ES97-3|Q9ES97-4|Q9ES97-5	Q9ES97	Reticulon-3 OS=Mus musculus GN=Rtn3 PE=1 SV=2|Isoform 2 of Reticulon-3 OS=Mus musculus GN=Rtn3|Isoform 3 of Reticulon-3 OS=Mus musculus GN=Rtn3|Isoform 4 of Reticulon-3 OS=Mus musculus GN=Rtn3|Isoform 5 of Reticulon-3 OS=Mus musculus GN=Rtn3	7.45952	0.230407	1.17317		24.0185	1.20143	0.279612	0.36964	-6.79907	0.741932	0.91853	1	0.279612	0.36964
Pxk	Q8BX57|Q8BX57-2	Q8BX57	PX domain-containing protein kinase-like protein OS=Mus musculus GN=Pxk PE=1 SV=2|Isoform 2 of PX domain-containing protein kinase-like protein OS=Mus musculus GN=Pxk	6.88934	0.230319	1.17309		24.6089	2.92516	0.0299392	0.067434	-4.52987	0.422701	0.86529	1	0.0299392	0.067434
Tmem43	Q9DBS1	Q9DBS1	Transmembrane protein 43 OS=Mus musculus GN=Tmem43 PE=1 SV=1	7.91601	0.230267	1.17305		25.0582	2.57624	0.0462153	0.092177	-5.0003	0.48012	0.879459	1	0.0462153	0.092177
Tmem237	A0A087WQC2|Q3V0J1|Q3V0J1-2|Q3V0J1-3	Q3V0J1	Transmembrane protein 237 (Fragment) OS=Mus musculus GN=Tmem237 PE=1 SV=1|Transmembrane protein 237 OS=Mus musculus GN=Tmem237 PE=1 SV=1|Isoform 2 of Transmembrane protein 237 OS=Mus musculus GN=Tmem237|Isoform 3 of Transmembrane protein 237 OS=Mus musculus GN=Tmem237	6.25232	0.230206	1.173		22.4755	3.30737	0.0189976	0.0485836	-4.02936	0.36467	0.84713	1	0.0189976	0.0485836
Ugp2	Q91ZJ5	Q91ZJ5	UTP--glucose-1-phosphate uridylyltransferase OS=Mus musculus GN=Ugp2 PE=1 SV=3	8.09144	0.230195	1.17299		27.2892	2.88059	0.0316155	0.069992	-4.58934	0.429803	0.867221	1	0.0316155	0.069992
Txnrd1	Q9JMH6|Q9JMH6-2	Q9JMH6	Thioredoxin reductase 1, cytoplasmic OS=Mus musculus GN=Txnrd1 PE=1 SV=3|Isoform 2 of Thioredoxin reductase 1, cytoplasmic OS=Mus musculus GN=Txnrd1	8.69523	0.230003	1.17284		27.8617	3.9112	0.00970035	0.0300035	-3.27954	0.283719	0.811725	1	0.00970035	0.0300035
Golph3	Q9CRA5	Q9CRA5	Golgi phosphoprotein 3 OS=Mus musculus GN=Golph3 PE=1 SV=1	7.29378	0.229999	1.17283		25.2422	4.28061	0.00660945	0.0230501	-2.84765	0.240694	0.785296	1	0.00660945	0.0230501
Hdac6	Q9Z2V5	Q9Z2V5	Histone deacetylase 6 OS=Mus musculus GN=Hdac6 PE=1 SV=3	7.4295	0.229699	1.17259		25.8745	2.40499	0.0575286	0.108232	-5.23415	0.509784	0.885671	1	0.0575286	0.108232
Troap	B7ZNG4	B7ZNG4	Tastin OS=Mus musculus GN=Troap PE=2 SV=1	6.6338	0.229323	1.17228		22.2055	3.04745	0.025821	0.0605997	-4.36779	0.40357	0.8598	1	0.025821	0.0605997
Tyk2	E9QJS1|Q9R117	E9QJS1	Non-receptor tyrosine-protein kinase TYK2 OS=Mus musculus GN=Tyk2 PE=1 SV=1|Non-receptor tyrosine-protein kinase TYK2 OS=Mus musculus GN=Tyk2 PE=1 SV=2	6.68315	0.229209	1.17219		23.1014	1.36755	0.22563	0.312253	-6.60618	0.707791	0.914934	1	0.22563	0.312253
Alad	P10518	P10518	Delta-aminolevulinic acid dehydratase OS=Mus musculus GN=Alad PE=1 SV=1	8.64908	0.228878	1.17192		27.1443	3.53298	0.0146803	0.0402542	-3.74299	0.332875	0.834939	1	0.0146803	0.0402542
Nagk	Q3U2G9|Q9D997|Q9QZ08	Q3U2G9	N-acetyl-D-glucosamine kinase OS=Mus musculus GN=Nagk PE=1 SV=1|N-acetyl-D-glucosamine kinase OS=Mus musculus GN=Nagk PE=1 SV=1|N-acetyl-D-glucosamine kinase OS=Mus musculus GN=Nagk PE=1 SV=3	7.54547	0.228695	1.17177		25.3644	3.48126	0.015563	0.0420556	-3.808	0.340001	0.837838	1	0.015563	0.0420556
Lypla1	P97823	P97823	Acyl-protein thioesterase 1 OS=Mus musculus GN=Lypla1 PE=1 SV=1	7.73604	0.228637	1.17173		25.1702	3.5682	0.0141113	0.0390392	-3.69893	0.328078	0.832929	1	0.0141113	0.0390392
Mfge8	P21956|P21956-2	P21956	Lactadherin OS=Mus musculus GN=Mfge8 PE=1 SV=3|Isoform 2 of Lactadherin OS=Mus musculus GN=Mfge8	7.61741	0.2286	1.1717		25.4725	2.43738	0.0551803	0.105121	-5.18985	0.504102	0.884531	1	0.0551803	0.105121
Neb	A2AQA9|E9Q1W3	A2AQA9	Protein Neb OS=Mus musculus GN=Neb PE=1 SV=1|Protein Neb OS=Mus musculus GN=Neb PE=1 SV=1	6.58043	0.228304	1.17146		22.8059	2.43368	0.0554428	0.105448	-5.1949	0.504748	0.884662	1	0.0554428	0.105448
Zzef1	A0A140LJ04|E9Q5W5|Q5SSH7|Q5SSH7-2	Q5SSH7	Zinc finger ZZ-type and EF-hand domain-containing protein 1 OS=Mus musculus GN=Zzef1 PE=1 SV=1|Zinc finger ZZ-type and EF-hand domain-containing protein 1 OS=Mus musculus GN=Zzef1 PE=1 SV=1|Zinc finger ZZ-type and EF-hand domain-containing protein 1 OS=Mus musculus GN=Zzef1 PE=1 SV=2|Isoform 2 of Zinc finger ZZ-type and EF-hand domain-containing protein 1 OS=Mus musculus GN=Zzef1	7.22943	0.227853	1.17109		26.2329	3.62176	0.0132931	0.0374242	-3.6323	0.32087	0.829815	1	0.0132931	0.0374242
Ltbp4	D3Z598|E9QPS5|Q8K4G1|Q8K4G1-2|Q8K4G1-3	D3Z598	Latent-transforming growth factor beta-binding protein 4 OS=Mus musculus GN=Ltbp4 PE=1 SV=1|Latent-transforming growth factor beta-binding protein 4 OS=Mus musculus GN=Ltbp4 PE=1 SV=1|Latent-transforming growth factor beta-binding protein 4 OS=Mus musculus GN=Ltbp4 PE=1 SV=2|Isoform 2 of Latent-transforming growth factor beta-binding protein 4 OS=Mus musculus GN=Ltbp4|Isoform 3 of Latent-transfor…	5.88192	0.227283	1.17063		21.0732	2.58533	0.0456858	0.0913717	-4.98793	0.478572	0.879116	1	0.0456858	0.0913717
Gpr107	Q148Z6|Q8BUV8	Q148Z6	Expressed sequence AI790205 OS=Mus musculus GN=Gpr107 PE=1 SV=1|Protein GPR107 OS=Mus musculus GN=Gpr107 PE=1 SV=2	7.33958	0.227235	1.17059		24.9944	3.80372	0.0108879	0.0325686	-3.40907	0.297159	0.818697	1	0.0108879	0.0325686
Nelfe	P19426|P19426-2	P19426	Negative elongation factor E OS=Mus musculus GN=Nelfe PE=1 SV=2|Isoform 2 of Negative elongation factor E OS=Mus musculus GN=Nelfe	7.2367	0.226956	1.17036		25.3116	3.37296	0.0176111	0.0462245	-3.94536	0.355236	0.843705	1	0.0176111	0.0462245
Egln1	Q91YE3	Q91YE3	Egl nine homolog 1 OS=Mus musculus GN=Egln1 PE=1 SV=2	6.52652	0.226653	1.17012		22.8475	4.27948	0.00661706	0.0230527	-2.84894	0.240819	0.785384	1	0.00661706	0.0230527
Arhgap30	E9QMX7|Q640N3|Q640N3-2	E9QMX7	Rho GTPase-activating protein 30 OS=Mus musculus GN=Arhgap30 PE=1 SV=1|Rho GTPase-activating protein 30 OS=Mus musculus GN=Arhgap30 PE=1 SV=3|Isoform 2 of Rho GTPase-activating protein 30 OS=Mus musculus GN=Arhgap30	7.09153	0.226289	1.16982		25.2196	3.2275	0.0208528	0.0519578	-4.13242	0.376366	0.851174	1	0.0208528	0.0519578
Dnajb14	Q149L6|Q149L6-2	Q149L6	DnaJ homolog subfamily B member 14 OS=Mus musculus GN=Dnajb14 PE=2 SV=1|Isoform 2 of DnaJ homolog subfamily B member 14 OS=Mus musculus GN=Dnajb14	6.40294	0.22617	1.16973		23.4705	1.89872	0.111754	0.18101	-5.92409	0.602776	0.901573	1	0.111754	0.18101
Eif4g1	E9PVC5	E9PVC5	Eukaryotic translation initiation factor 4 gamma 1 OS=Mus musculus GN=Eif4g1 PE=1 SV=1	8.20621	0.226123	1.16969		28.2926	4.00196	0.00881103	0.0280703	-3.17151	0.272694	0.805593	1	0.00881103	0.0280703
Ivd	Q9JHI5	Q9JHI5	Isovaleryl-CoA dehydrogenase, mitochondrial OS=Mus musculus GN=Ivd PE=1 SV=1	7.40913	0.225885	1.16949		25.4223	3.27343	0.0197624	0.0500497	-4.07305	0.369611	0.848865	1	0.0197624	0.0500497
Spag9	Q58A65-2|Q58A65-4	Q58A65	Isoform 2 of C-Jun-amino-terminal kinase-interacting protein 4 OS=Mus musculus GN=Spag9|Isoform 4 of C-Jun-amino-terminal kinase-interacting protein 4 OS=Mus musculus GN=Spag9	7.61533	0.225767	1.1694		26.993	4.24072	0.00688237	0.0236286	-2.8933	0.245106	0.788343	1	0.00688237	0.0236286
Knop1	H7BX94|Q9Z2Q2	H7BX94	Lysine-rich nucleolar protein 1 OS=Mus musculus GN=Knop1 PE=1 SV=2|Lysine-rich nucleolar protein 1 OS=Mus musculus GN=Knop1 PE=1 SV=2	7.05512	0.225741	1.16938		24.4015	3.94867	0.00932133	0.029141	-3.23478	0.27913	0.809221	1	0.00932133	0.029141
Rdh14	Q9ERI6	Q9ERI6	Retinol dehydrogenase 14 OS=Mus musculus GN=Rdh14 PE=1 SV=1	6.95577	0.225718	1.16936		24.4824	3.90637	0.00975038	0.0300943	-3.28532	0.284313	0.812045	1	0.00975038	0.0300943
Usp38	Q8BW70	Q8BW70	Ubiquitin carboxyl-terminal hydrolase 38 OS=Mus musculus GN=Usp38 PE=1 SV=2	6.40055	0.225694	1.16934		22.7152	2.59499	0.0451301	0.0906655	-4.97478	0.47693	0.87875	1	0.0451301	0.0906655
Slc25a16	Q8C0K5	Q8C0K5	Graves disease carrier protein homolog OS=Mus musculus GN=Slc25a16 PE=1 SV=1	6.87103	0.225684	1.16933		22.9518	3.95409	0.00926799	0.0290055	-3.22834	0.278472	0.808856	1	0.00926799	0.0290055
Ktn1	F8VQC7	F8VQC7	Kinectin OS=Mus musculus GN=Ktn1 PE=1 SV=1	8.16853	0.225616	1.16928		28.9075	3.98301	0.00898878	0.0284067	-3.19397	0.274971	0.806892	1	0.00898878	0.0284067
Agap3	A0A0G2JDW1|F8VQE9|Q8VHH5	F8VQE9	Arf-GAP with GTPase, ANK repeat and PH domain-containing protein 3 OS=Mus musculus GN=Agap3 PE=1 SV=1|Arf-GAP with GTPase, ANK repeat and PH domain-containing protein 3 OS=Mus musculus GN=Agap3 PE=1 SV=1|Arf-GAP with GTPase, ANK repeat and PH domain-containing protein 3 OS=Mus musculus GN=Agap3 PE=1 SV=1	7.16035	0.225372	1.16908		24.5141	3.21357	0.0211967	0.0525896	-4.15049	0.37843	0.851866	1	0.0211967	0.0525896
Coro1b	A2RS22|Q9WUM3	A2RS22	Coronin OS=Mus musculus GN=Coro1b PE=1 SV=1|Coronin-1B OS=Mus musculus GN=Coro1b PE=1 SV=1	8.21271	0.225359	1.16907		26.4052	3.73549	0.0117269	0.034285	-3.49219	0.305908	0.822964	1	0.0117269	0.034285
Kansl2	F8WJE3|Q8BQR4|Q8BQR4-2	F8WJE3	KAT8 regulatory NSL complex subunit 2 OS=Mus musculus GN=Kansl2 PE=1 SV=1|KAT8 regulatory NSL complex subunit 2 OS=Mus musculus GN=Kansl2 PE=1 SV=1|Isoform 2 of KAT8 regulatory NSL complex subunit 2 OS=Mus musculus GN=Kansl2	6.22642	0.225321	1.16904		22.3535	3.5208	0.0148829	0.0407033	-3.75826	0.334544	0.835627	1	0.0148829	0.0407033
Cfl2	P45591|Q3UHW9	P45591	Cofilin-2 OS=Mus musculus GN=Cfl2 PE=1 SV=1|Cofilin-2 OS=Mus musculus GN=Cfl2 PE=1 SV=1	8.08793	0.225124	1.16888		26.1889	3.30806	0.0189822	0.0485658	-4.02847	0.364569	0.847095	1	0.0189822	0.0485658
Dock1	Q8BUR4	Q8BUR4	Dedicator of cytokinesis protein 1 OS=Mus musculus GN=Dock1 PE=1 SV=3	7.04859	0.224486	1.16836		25.8675	3.85298	0.0103243	0.0314321	-3.34948	0.290947	0.81554	1	0.0103243	0.0314321
Ctsb	P10605	P10605	Cathepsin B OS=Mus musculus GN=Ctsb PE=1 SV=2	8.25516	0.224199	1.16813		26.2695	2.45905	0.0536661	0.103012	-5.16021	0.500318	0.883759	1	0.0536661	0.103012
Stk25	Q9Z2W1	Q9Z2W1	Serine/threonine-protein kinase 25 OS=Mus musculus GN=Stk25 PE=1 SV=2	6.91646	0.224191	1.16812		24.2531	4.1081	0.00788633	0.0260693	-3.04677	0.260177	0.798129	1	0.00788633	0.0260693
Dpm3	Q9D1Q4	Q9D1Q4	Dolichol-phosphate mannosyltransferase subunit 3 OS=Mus musculus GN=Dpm3 PE=1 SV=1	7.16795	0.223671	1.1677		22.957	3.96867	0.00912598	0.0287	-3.21099	0.276703	0.807869	1	0.00912598	0.0287
Dcaf7	P61963	P61963	DDB1- and CUL4-associated factor 7 OS=Mus musculus GN=Dcaf7 PE=1 SV=1	7.48024	0.223669	1.1677		25.1606	3.47434	0.0156856	0.0422886	-3.81673	0.340962	0.838221	1	0.0156856	0.0422886
Tsg101	Q3UCW0|Q61187	Q3UCW0	MCG123182 OS=Mus musculus GN=Tsg101 PE=1 SV=1|Tumor susceptibility gene 101 protein OS=Mus musculus GN=Tsg101 PE=1 SV=2	6.99717	0.223485	1.16755		23.5407	2.80447	0.0347223	0.0745765	-4.69138	0.442092	0.870433	1	0.0347223	0.0745765
Smap2	Q7TN29|Q7TN29-2	Q7TN29	Stromal membrane-associated protein 2 OS=Mus musculus GN=Smap2 PE=1 SV=1|Isoform 2 of Stromal membrane-associated protein 2 OS=Mus musculus GN=Smap2	6.89382	0.223463	1.16753		24.4062	4.09342	0.00800738	0.026296	-3.06392	0.261884	0.79918	1	0.00800738	0.026296
Mina	Q8CD15	Q8CD15	Bifunctional lysine-specific demethylase and histidyl-hydroxylase MINA OS=Mus musculus GN=Mina PE=1 SV=2	7.90152	0.223277	1.16738		26.8374	3.95448	0.00926416	0.0290055	-3.22787	0.278424	0.80883	1	0.00926416	0.0290055
Rnf219	G3X8V5|Q8K2Y0	G3X8V5	RIKEN cDNA 2610206B13, isoform CRA_b OS=Mus musculus GN=Rnf219 PE=1 SV=1|RING finger protein 219 OS=Mus musculus GN=Rnf219 PE=1 SV=2	6.18111	0.223083	1.16723		22.9867	2.77121	0.0361835	0.0768585	-4.73614	0.447525	0.871805	1	0.0361835	0.0768585
Spc25	A2AUT1|A2AUT3|A2AUT4|Q3UA16|Q3UA16-2|Q3UA16-3	A2AUT1	Kinetochore protein Spc25 (Fragment) OS=Mus musculus GN=Spc25 PE=1 SV=1|Kinetochore protein Spc25 (Fragment) OS=Mus musculus GN=Spc25 PE=1 SV=1|Kinetochore protein Spc25 (Fragment) OS=Mus musculus GN=Spc25 PE=1 SV=1|Kinetochore protein Spc25 OS=Mus musculus GN=Spc25 PE=2 SV=1|Isoform 2 of Kinetochore protein Spc25 OS=Mus musculus GN=Spc25|Isoform 3 of Kinetochore protein Spc25 OS=Mus musculus GN=…	7.13865	0.22295	1.16712		24.9401	2.65596	0.0417885	0.0855473	-4.89195	0.466637	0.876406	1	0.0417885	0.0855473
Nol4l	Q3UH85	Q3UH85	Nucleolar protein 4-like OS=Mus musculus GN=Nol4l PE=1 SV=1	6.64	0.222638	1.16686		23.7349	3.21763	0.0210958	0.0524287	-4.14522	0.377827	0.851664	1	0.0210958	0.0524287
Plxnb2	B2RXS4	B2RXS4	Plexin-B2 OS=Mus musculus GN=Plxnb2 PE=1 SV=1	7.48147	0.222586	1.16682		26.9038	4.08249	0.0080989	0.0264716	-3.07671	0.26316	0.799959	1	0.0080989	0.0264716
Ubr7	Q52KC0|Q8BU04	Q52KC0	Putative E3 ubiquitin-protein ligase UBR7 OS=Mus musculus GN=Ubr7 PE=1 SV=1|Putative E3 ubiquitin-protein ligase UBR7 OS=Mus musculus GN=Ubr7 PE=1 SV=1	7.35041	0.22225	1.16655		25.8639	3.66075	0.012731	0.0363262	-3.58405	0.315687	0.827503	1	0.012731	0.0363262
Trappc1	B1ASW5|Q14BF8|Q5NCF2	B1ASW5	Trafficking protein particle complex 1, isoform CRA_a OS=Mus musculus GN=Trappc1 PE=1 SV=1|Trafficking protein particle complex 1, isoform CRA_b OS=Mus musculus GN=Trappc1 PE=1 SV=1|Trafficking protein particle complex subunit 1 OS=Mus musculus GN=Trappc1 PE=1 SV=1	6.91808	0.222231	1.16654		24.1644	3.17974	0.0220583	0.0541727	-4.19446	0.38347	0.853527	1	0.0220583	0.0541727
Fam109b	A0A0R4J1Z2|Q14B98	Q14B98	Sesquipedalian-2 OS=Mus musculus GN=Fam109b PE=1 SV=1|Sesquipedalian-2 OS=Mus musculus GN=Fam109b PE=1 SV=1	6.11675	0.221793	1.16618		21.6602	2.09906	0.0857354	0.146407	-5.65271	0.565073	0.895691	1	0.0857354	0.146407
Clp1	Q99LI9	Q99LI9	Polyribonucleotide 5'-hydroxyl-kinase Clp1 OS=Mus musculus GN=Clp1 PE=1 SV=1	6.93392	0.221653	1.16607		24.303	3.46401	0.0158706	0.0426491	-3.82977	0.342399	0.83879	1	0.0158706	0.0426491
Brca1	P48754	P48754	Breast cancer type 1 susceptibility protein homolog OS=Mus musculus GN=Brca1 PE=1 SV=3	6.90613	0.221379	1.16585		25.7835	2.39695	0.0581282	0.108908	-5.24516	0.5112	0.885951	1	0.0581282	0.108908
Echdc2	Q3TLP5|Q3TLP5-2	Q3TLP5	Enoyl-CoA hydratase domain-containing protein 2, mitochondrial OS=Mus musculus GN=Echdc2 PE=1 SV=2|Isoform 2 of Enoyl-CoA hydratase domain-containing protein 2, mitochondrial OS=Mus musculus GN=Echdc2	7.41062	0.221271	1.16576		24.6953	2.43069	0.0556567	0.105751	-5.19899	0.505272	0.884768	1	0.0556567	0.105751
Setd8|Kmt5a	A0A0G2JFK5|D3YXI6|E9QNB8|Q2YDW7	Q2YDW7	N-lysine methyltransferase KMT5A OS=Mus musculus GN=Setd8 PE=1 SV=1|N-lysine methyltransferase KMT5A OS=Mus musculus GN=Setd8 PE=1 SV=1|N-lysine methyltransferase KMT5A OS=Mus musculus GN=Setd8 PE=1 SV=1|N-lysine methyltransferase KMT5A OS=Mus musculus GN=Kmt5a PE=1 SV=1	6.30973	0.221244	1.16574		22.2915	2.28659	0.067064	0.121513	-5.39629	0.530842	0.889706	1	0.067064	0.121513
Hgs	B1ATZ0|B1ATZ1|Q3UMA3|Q99LI8	Q99LI8	Hepatocyte growth factor-regulated tyrosine kinase substrate OS=Mus musculus GN=Hgs PE=1 SV=1|Hepatocyte growth factor-regulated tyrosine kinase substrate OS=Mus musculus GN=Hgs PE=1 SV=1|Hepatocyte growth factor-regulated tyrosine kinase substrate OS=Mus musculus GN=Hgs PE=1 SV=1|Hepatocyte growth factor-regulated tyrosine kinase substrate OS=Mus musculus GN=Hgs PE=1 SV=2	7.58576	0.221051	1.16558		26.9702	3.70444	0.0121328	0.0351753	-3.53025	0.309947	0.824867	1	0.0121328	0.0351753
Szt2	A2A9C3|A2A9C3-2	A2A9C3	Protein SZT2 OS=Mus musculus GN=Szt2 PE=1 SV=1|Isoform 2 of Protein SZT2 OS=Mus musculus GN=Szt2	6.54586	0.220906	1.16547		24.2863	3.83844	0.0104871	0.0317615	-3.36703	0.292771	0.816478	1	0.0104871	0.0317615
Foxm1	E9Q7Y0|O08696|Q6P1H7	E9Q7Y0	Forkhead box protein M1 OS=Mus musculus GN=Foxm1 PE=1 SV=1|Forkhead box protein M1 OS=Mus musculus GN=Foxm1 PE=1 SV=2|Forkhead box M1 OS=Mus musculus GN=Foxm1 PE=1 SV=1	6.83778	0.220857	1.16543		23.4178	2.97865	0.0280549	0.0643118	-4.45877	0.414269	0.862924	1	0.0280549	0.0643118
Morf4l2	Q9R0Q4	Q9R0Q4	Mortality factor 4-like protein 2 OS=Mus musculus GN=Morf4l2 PE=1 SV=1	7.29514	0.220047	1.16477		25.2999	2.2287	0.0723228	0.128481	-5.47555	0.541295	0.891605	1	0.0723228	0.128481
Cog8	Q9JJA2	Q9JJA2	Conserved oligomeric Golgi complex subunit 8 OS=Mus musculus GN=Cog8 PE=1 SV=3	7.33473	0.21981	1.16458		25.0944	3.60571	0.0135325	0.0378157	-3.65222	0.323018	0.830755	1	0.0135325	0.0378157
Dpagt1	P42867	P42867	UDP-N-acetylglucosamine--dolichyl-phosphate N-acetylglucosaminephosphotransferase OS=Mus musculus GN=Dpagt1 PE=1 SV=2	6.84231	0.219318	1.16418		23.532	3.19727	0.0216071	0.0533802	-4.17166	0.380853	0.852669	1	0.0216071	0.0533802
Cpd	O89001	O89001	Carboxypeptidase D OS=Mus musculus GN=Cpd PE=1 SV=2	5.09877	0.218809	1.16377		21.0936	1.56769	0.173432	0.254099	-6.35845	0.667428	0.910251	1	0.173432	0.254099
Supt7l	E9PX66|Q9CZV5	E9PX66	STAGA complex 65 subunit gamma OS=Mus musculus GN=Supt7l PE=1 SV=1|STAGA complex 65 subunit gamma OS=Mus musculus GN=Supt7l PE=1 SV=1	6.36374	0.218438	1.16347		23.2503	3.45375	0.0160567	0.04301	-3.84273	0.34383	0.839353	1	0.0160567	0.04301
Magi3	G5E8T6|Q9EQJ9	G5E8T6	Membrane associated guanylate kinase, WW and PDZ domain containing 3, isoform CRA_a OS=Mus musculus GN=Magi3 PE=1 SV=1|Membrane-associated guanylate kinase, WW and PDZ domain-containing protein 3 OS=Mus musculus GN=Magi3 PE=1 SV=2	6.84881	0.217878	1.16302		25.2437	4.01934	0.00865152	0.0277879	-3.15097	0.270617	0.804393	1	0.00865152	0.0277879
Tbl1xr1	Q8BHJ5	Q8BHJ5	F-box-like/WD repeat-containing protein TBL1XR1 OS=Mus musculus GN=Tbl1xr1 PE=1 SV=1	7.18821	0.217874	1.16302		23.5723	3.25651	0.0201567	0.0507889	-4.0949	0.372092	0.849722	1	0.0201567	0.0507889
Klc2	D3YXZ3|Q91YS4	D3YXZ3	Kinesin light chain 2 OS=Mus musculus GN=Klc2 PE=1 SV=1|Kinesin light chain 2 OS=Mus musculus GN=Klc2 PE=1 SV=1	6.83156	0.217865	1.16301		25.0899	2.85558	0.0326015	0.0714677	-4.62281	0.433819	0.868288	1	0.0326015	0.0714677
Gnpnat1	Q9JK38	Q9JK38	Glucosamine 6-phosphate N-acetyltransferase OS=Mus musculus GN=Gnpnat1 PE=1 SV=1	6.69152	0.217829	1.16298		23.7073	3.54344	0.0145086	0.0399107	-3.72988	0.331445	0.834345	1	0.0145086	0.0399107
Nek9	Q8K1R7	Q8K1R7	Serine/threonine-protein kinase Nek9 OS=Mus musculus GN=Nek9 PE=1 SV=2	7.52155	0.217754	1.16292		25.3209	4.07318	0.00817783	0.026642	-3.08762	0.264251	0.80062	1	0.00817783	0.026642
Sat2	Q6P8J2	Q6P8J2	Diamine acetyltransferase 2 OS=Mus musculus GN=Sat2 PE=1 SV=1	6.84528	0.217062	1.16236		23.6655	2.32296	0.0639681	0.117255	-5.34648	0.524327	0.888488	1	0.0639681	0.117255
Tanc1	E9QAF9|Q0VGY8	E9QAF9	Protein TANC1 OS=Mus musculus GN=Tanc1 PE=1 SV=1|Protein TANC1 OS=Mus musculus GN=Tanc1 PE=1 SV=2	6.38367	0.216293	1.16174		23.4594	2.71879	0.0386244	0.0803708	-4.80688	0.456163	0.873926	1	0.0386244	0.0803708
Pcca	Q3UGC8|Q91ZA3	Q3UGC8	Propionyl-CoA carboxylase alpha chain, mitochondrial OS=Mus musculus GN=Pcca PE=1 SV=1|Propionyl-CoA carboxylase alpha chain, mitochondrial OS=Mus musculus GN=Pcca PE=1 SV=2	7.58177	0.216036	1.16154		26.1443	3.07287	0.0250461	0.0592592	-4.33432	0.39966	0.858622	1	0.0250461	0.0592592
Synrg	Q5SV85|V9GX40|V9GXD9	Q5SV85	Synergin gamma OS=Mus musculus GN=Synrg PE=1 SV=1|Synergin gamma OS=Mus musculus GN=Synrg PE=1 SV=1|Synergin gamma OS=Mus musculus GN=Synrg PE=1 SV=1	7.2728	0.215733	1.16129		26.6957	3.9955	0.00887118	0.0281882	-3.17916	0.273469	0.806037	1	0.00887118	0.0281882
Wwp2	I3RSH5|Q9DBH0	I3RSH5	E3 ubiquitin-protein ligase OS=Mus musculus GN=Wwp2 PE=1 SV=1|NEDD4-like E3 ubiquitin-protein ligase WWP2 OS=Mus musculus GN=Wwp2 PE=1 SV=1	6.72231	0.215419	1.16104		24.0629	3.80865	0.01083	0.0324787	-3.40309	0.296534	0.818384	1	0.01083	0.0324787
Tcf7l2	A0A0R4J1F7|A0A0R4J1F9|A0A0R4J1G0|A0A0R4J1G1|D3YWT3|D3Z2K5|E9Q990|E9QQ89|E9QQ90|E9QQ91|F6WPX2|Q3V1G9|Q80WT9|Q924A0|Q924A0-2|Q924A0-3|Q924A0-4|Q924A0-5|Q924A0-6|Q924A0-7|Q924A0-8	Q924A0	Transcription factor 7-like 2 OS=Mus musculus GN=Tcf7l2 PE=1 SV=1|Transcription factor 7-like 2 OS=Mus musculus GN=Tcf7l2 PE=1 SV=1|Transcription factor 7-like 2 OS=Mus musculus GN=Tcf7l2 PE=1 SV=1|Transcription factor 7-like 2 OS=Mus musculus GN=Tcf7l2 PE=1 SV=1|Transcription factor 7-like 2 OS=Mus musculus GN=Tcf7l2 PE=1 SV=1|Transcription factor 7-like 2 OS=Mus musculus GN=Tcf7l2 PE=1 SV=1|Tra…	6.58289	0.215243	1.1609		23.4219	1.70285	0.144973	0.222254	-6.18402	0.640696	0.906856	1	0.144973	0.222254
Ip6k1	Q6PD10	Q6PD10	Inositol hexakisphosphate kinase 1 OS=Mus musculus GN=Ip6k1 PE=2 SV=1	6.37492	0.215213	1.16087		23.6767	3.93187	0.00948914	0.0295881	-3.25482	0.281181	0.810349	1	0.00948914	0.0295881
Nacc1	Q7TSZ8	Q7TSZ8	Nucleus accumbens-associated protein 1 OS=Mus musculus GN=Nacc1 PE=1 SV=1	7.03736	0.215041	1.16074		23.6553	1.59878	0.166439	0.247278	-6.31877	0.66124	0.909488	1	0.166439	0.247278
Sdr39u1	Q5M8N4-2	Q5M8N4	Isoform 2 of Epimerase family protein SDR39U1 OS=Mus musculus GN=Sdr39u1	6.73798	0.215016	1.16072		25.0075	2.20514	0.0745866	0.131419	-5.5078	0.54558	0.892365	1	0.0745866	0.131419
Slc25a51	Q5HZI9	Q5HZI9	Solute carrier family 25 member 51 OS=Mus musculus GN=Slc25a51 PE=1 SV=1	7.14313	0.214943	1.16066		24.9609	3.37203	0.01763	0.0462245	-3.94655	0.355369	0.843754	1	0.01763	0.0462245
Ccdc59	Q8R2N0	Q8R2N0	Thyroid transcription factor 1-associated protein 26 OS=Mus musculus GN=Ccdc59 PE=2 SV=2	6.70323	0.214787	1.16053		22.8787	1.59728	0.166769	0.247439	-6.32068	0.661537	0.909525	1	0.166769	0.247439
Wdr55	Q9CX97	Q9CX97	WD repeat-containing protein 55 OS=Mus musculus GN=Wdr55 PE=1 SV=2	5.85729	0.214761	1.16051		20.4371	1.11924	0.310337	0.403112	-6.88922	0.75902	0.920217	1	0.310337	0.403112
Kif1bp	Q6ZPU9	Q6ZPU9	KIF1-binding protein OS=Mus musculus GN=Kif1bp PE=1 SV=2	7.33427	0.21454	1.16033		25.4021	2.57142	0.0464985	0.0926466	-5.00686	0.480941	0.87964	1	0.0464985	0.0926466
Wac	E9Q5D5|Q924H7|Q924H7-2	E9Q5D5	WW domain-containing adapter protein with coiled-coil OS=Mus musculus GN=Wac PE=1 SV=1|WW domain-containing adapter protein with coiled-coil OS=Mus musculus GN=Wac PE=1 SV=2|Isoform 2 of WW domain-containing adapter protein with coiled-coil OS=Mus musculus GN=Wac	6.52491	0.214336	1.16017		23.5193	2.39301	0.0584244	0.109262	-5.25055	0.511895	0.886089	1	0.0584244	0.109262
Q8VDP2	Q8VDP2	Q8VDP2	UPF0428 protein CXorf56 homolog OS=Mus musculus PE=1 SV=1	6.72235	0.214257	1.16011		23.539	2.73077	0.038051	0.0795761	-4.79069	0.45418	0.873445	1	0.038051	0.0795761
Znf672	Q99LH4	Q99LH4	Zinc finger protein 672 OS=Mus musculus GN=Znf672 PE=2 SV=1	6.00607	0.214171	1.16004		21.3265	1.18814	0.284393	0.374598	-6.8139	0.744687	0.918807	1	0.284393	0.374598
Htra2	Q9JIY5	Q9JIY5	Serine protease HTRA2, mitochondrial OS=Mus musculus GN=Htra2 PE=1 SV=2	7.67917	0.214167	1.16003		25.9674	3.02466	0.0265383	0.0617846	-4.39786	0.407095	0.860845	1	0.0265383	0.0617846
Fam98c	E9PYD1	E9PYD1	Protein Fam98c OS=Mus musculus GN=Fam98c PE=1 SV=1	6.64101	0.214086	1.15997		23.3164	2.35653	0.0612445	0.113225	-5.3005	0.518349	0.887347	1	0.0612445	0.113225
Ngly1	Q9JI78	Q9JI78	Peptide-N(4)-(N-acetyl-beta-glucosaminyl)asparagine amidase OS=Mus musculus GN=Ngly1 PE=1 SV=2	6.59568	0.214068	1.15995		23.6053	1.61376	0.163167	0.243787	-6.29954	0.658266	0.909116	1	0.163167	0.243787
Fam162a	Q9D6U8	Q9D6U8	Protein FAM162A OS=Mus musculus GN=Fam162a PE=1 SV=1	6.45449	0.213751	1.1597		24.0987	1.77527	0.131671	0.205434	-6.08874	0.626558	0.904954	1	0.131671	0.205434
Fuca1	Q99LJ1	Q99LJ1	Tissue alpha-L-fucosidase OS=Mus musculus GN=Fuca1 PE=1 SV=1	6.74562	0.213746	1.1597		22.8653	3.16716	0.0223886	0.0547069	-4.21085	0.385355	0.854139	1	0.0223886	0.0547069
Cirbp	P60824	P60824	Cold-inducible RNA-binding protein OS=Mus musculus GN=Cirbp PE=1 SV=1	7.94055	0.213737	1.15969		26.5351	3.97246	0.00908949	0.0286492	-3.20649	0.276244	0.807611	1	0.00908949	0.0286492
Mavs	Q8VCF0	Q8VCF0	Mitochondrial antiviral-signaling protein OS=Mus musculus GN=Mavs PE=1 SV=1	7.04095	0.213538	1.15953		23.647	2.22831	0.0723598	0.128507	-5.47609	0.541366	0.891618	1	0.0723598	0.128507
Sh3pxd2b	A2AAY5	A2AAY5	SH3 and PX domain-containing protein 2B OS=Mus musculus GN=Sh3pxd2b PE=1 SV=1	6.94161	0.213486	1.15949		24.4594	3.60176	0.0135922	0.0378916	-3.65713	0.323549	0.830985	1	0.0135922	0.0378916
Nelfa	Q8BG30	Q8BG30	Negative elongation factor A OS=Mus musculus GN=Nelfa PE=1 SV=1	6.85991	0.213347	1.15938		24.3662	2.20008	0.075082	0.131972	-5.51472	0.546501	0.892527	1	0.075082	0.131972
Mtmr12	Q80TA6	Q80TA6	Myotubularin-related protein 12 OS=Mus musculus GN=Mtmr12 PE=1 SV=2	7.04891	0.212723	1.15887		25.3341	2.89346	0.0311212	0.0692931	-4.57215	0.427746	0.866667	1	0.0311212	0.0692931
Fez2	D3Z6D5|Q3U049|Q6TYB5	D3Z6D5	Fasciculation and elongation protein zeta-2 OS=Mus musculus GN=Fez2 PE=1 SV=1|Fasciculation and elongation protein zeta-2 OS=Mus musculus GN=Fez2 PE=1 SV=1|Fasciculation and elongation protein zeta-2 OS=Mus musculus GN=Fez2 PE=2 SV=1	6.56125	0.212113	1.15838		21.9628	2.97948	0.0280267	0.0643118	-4.45767	0.414138	0.862887	1	0.0280267	0.0643118
Golgb1	E9PVZ8|E9QAH1	E9PVZ8	Protein Golgb1 OS=Mus musculus GN=Golgb1 PE=1 SV=1|Protein Golgb1 OS=Mus musculus GN=Golgb1 PE=1 SV=1	7.54949	0.21197	1.15827		27.5137	3.8179	0.0107221	0.0322885	-3.39188	0.295362	0.817795	1	0.0107221	0.0322885
Osbp	Q3B7Z2	Q3B7Z2	Oxysterol-binding protein 1 OS=Mus musculus GN=Osbp PE=1 SV=3	8.08949	0.211883	1.1582		26.932	2.96898	0.0283855	0.0647635	-4.47159	0.415785	0.863356	1	0.0283855	0.0647635
Shprh	Q7TPQ3|Q7TPQ3-2|Q7TPQ3-5	Q7TPQ3	E3 ubiquitin-protein ligase SHPRH OS=Mus musculus GN=Shprh PE=1 SV=1|Isoform 2 of E3 ubiquitin-protein ligase SHPRH OS=Mus musculus GN=Shprh|Isoform 4 of E3 ubiquitin-protein ligase SHPRH OS=Mus musculus GN=Shprh	6.36164	0.211822	1.15815		23.332	1.72778	0.14025	0.216381	-6.15134	0.635814	0.906207	1	0.14025	0.216381
Setd1a	E9PYH6	E9PYH6	Protein Setd1a OS=Mus musculus GN=Setd1a PE=1 SV=1	7.00057	0.211779	1.15812		26.0371	3.8543	0.0103096	0.0314202	-3.34789	0.290781	0.815454	1	0.0103096	0.0314202
Golph3l	H3BJ07|H3BJ12|K3W4Q3|Q8R088|Q8R088-3	H3BJ07	Golgi phosphoprotein 3-like OS=Mus musculus GN=Golph3l PE=1 SV=1|Golgi phosphoprotein 3-like (Fragment) OS=Mus musculus GN=Golph3l PE=1 SV=1|Golgi phosphoprotein 3-like OS=Mus musculus GN=Golph3l PE=1 SV=1|Golgi phosphoprotein 3-like OS=Mus musculus GN=Golph3l PE=1 SV=1|Isoform 3 of Golgi phosphoprotein 3-like OS=Mus musculus GN=Golph3l	6.87363	0.211764	1.1581		23.7021	2.66084	0.0415329	0.085114	-4.88533	0.465819	0.876216	1	0.0415329	0.085114
Adam17	E9PXU2|Q9Z0F8|Q9Z0F8-2	E9PXU2	Disintegrin and metalloproteinase domain-containing protein 17 OS=Mus musculus GN=Adam17 PE=1 SV=1|Disintegrin and metalloproteinase domain-containing protein 17 OS=Mus musculus GN=Adam17 PE=1 SV=3|Isoform Short of Disintegrin and metalloproteinase domain-containing protein 17 OS=Mus musculus GN=Adam17	7.26826	0.211606	1.15798		25.7087	1.70485	0.144589	0.221841	-6.1814	0.640304	0.906804	1	0.144589	0.221841
Kif1b	Q60575|Q60575-2|Q60575-3	Q60575	Kinesin-like protein KIF1B OS=Mus musculus GN=Kif1b PE=1 SV=2|Isoform 2 of Kinesin-like protein KIF1B OS=Mus musculus GN=Kif1b|Isoform 3 of Kinesin-like protein KIF1B OS=Mus musculus GN=Kif1b	7.09207	0.211535	1.15792		26.4418	2.77931	0.0358214	0.0763962	-4.72523	0.446198	0.871472	1	0.0358214	0.0763962
Srsf3	P84104|P84104-2	P84104	Serine/arginine-rich splicing factor 3 OS=Mus musculus GN=Srsf3 PE=1 SV=1|Isoform Short of Serine/arginine-rich splicing factor 3 OS=Mus musculus GN=Srsf3	8.41943	0.211383	1.1578		26.5074	2.45029	0.0542726	0.103868	-5.17219	0.501845	0.884072	1	0.0542726	0.103868
Ep400	F6R9G0|Q8CHI8|Q8CHI8-2|Q8CHI8-3|Q8CHI8-4	F6R9G0	E1A-binding protein p400 (Fragment) OS=Mus musculus GN=Ep400 PE=1 SV=1|E1A-binding protein p400 OS=Mus musculus GN=Ep400 PE=1 SV=3|Isoform 2 of E1A-binding protein p400 OS=Mus musculus GN=Ep400|Isoform 3 of E1A-binding protein p400 OS=Mus musculus GN=Ep400|Isoform 4 of E1A-binding protein p400 OS=Mus musculus GN=Ep400	6.78865	0.211269	1.15771		25.5614	3.13826	0.0231682	0.0560468	-4.24857	0.389705	0.855532	1	0.0231682	0.0560468
Camk2g	Q923T9-2|Q923T9-3	Q923T9	Isoform 2 of Calcium/calmodulin-dependent protein kinase type II subunit gamma OS=Mus musculus GN=Camk2g|Isoform 3 of Calcium/calmodulin-dependent protein kinase type II subunit gamma OS=Mus musculus GN=Camk2g	8.23102	0.211206	1.15766		26.5665	3.0333	0.026264	0.061441	-4.38646	0.405757	0.86045	1	0.026264	0.061441
Galnt2	Q6PB93|Q6PB93-2	Q6PB93	Polypeptide N-acetylgalactosaminyltransferase 2 OS=Mus musculus GN=Galnt2 PE=1 SV=1|Isoform 2 of Polypeptide N-acetylgalactosaminyltransferase 2 OS=Mus musculus GN=Galnt2	7.33116	0.211132	1.1576		25.8115	3.28691	0.0194546	0.0494049	-4.05568	0.367644	0.848179	1	0.0194546	0.0494049
Anapc2	Q8BZQ7	Q8BZQ7	Anaphase-promoting complex subunit 2 OS=Mus musculus GN=Anapc2 PE=1 SV=2	7.04855	0.211099	1.15757		25.946	2.77555	0.035989	0.0766568	-4.73029	0.446814	0.871627	1	0.035989	0.0766568
Map3k3	Q61084	Q61084	Mitogen-activated protein kinase kinase kinase 3 OS=Mus musculus GN=Map3k3 PE=1 SV=1	6.60944	0.211074	1.15755		22.5876	2.87557	0.0318106	0.0702899	-4.59604	0.430607	0.867436	1	0.0318106	0.0702899
Dnpep	Q3TVK3|Q8BPW9|Q9Z2W0	Q3TVK3	Aspartyl aminopeptidase OS=Mus musculus GN=Dnpep PE=1 SV=1|Aspartyl aminopeptidase OS=Mus musculus GN=Dnpep PE=1 SV=1|Aspartyl aminopeptidase OS=Mus musculus GN=Dnpep PE=1 SV=2	7.82974	0.211011	1.1575		25.8969	2.16206	0.0789196	0.137184	-5.56672	0.553456	0.893734	1	0.0789196	0.137184
Mkrn1	E9QAG7|F6S742|Q8C5V4|Q99LD7|Q9QXP6	E9QAG7	E3 ubiquitin-protein ligase makorin-1 OS=Mus musculus GN=Mkrn1 PE=1 SV=1|E3 ubiquitin-protein ligase makorin-1 (Fragment) OS=Mus musculus GN=Mkrn1 PE=1 SV=1|E3 ubiquitin-protein ligase makorin-1 OS=Mus musculus GN=Mkrn1 PE=1 SV=1|E3 ubiquitin-protein ligase makorin-1 OS=Mus musculus GN=Mkrn1 PE=1 SV=1|E3 ubiquitin-protein ligase makorin-1 OS=Mus musculus GN=Mkrn1 PE=1 SV=1	6.64268	0.210982	1.15748		23.4515	1.80602	0.126398	0.199334	-6.04797	0.620597	0.904128	1	0.126398	0.199334
Stat3	P42227|P42227-2|P42227-3	P42227	Signal transducer and activator of transcription 3 OS=Mus musculus GN=Stat3 PE=1 SV=2|Isoform Stat3B of Signal transducer and activator of transcription 3 OS=Mus musculus GN=Stat3|Isoform Del-701 of Signal transducer and activator of transcription 3 OS=Mus musculus GN=Stat3	7.49304	0.210499	1.15709		25.3515	3.47172	0.0157323	0.0423752	-3.82003	0.341326	0.838365	1	0.0157323	0.0423752
Ist1	Q9CX00	Q9CX00	IST1 homolog OS=Mus musculus GN=Ist1 PE=1 SV=1	6.98628	0.210116	1.15678		24.4524	3.34851	0.0181142	0.0470904	-3.9766	0.358734	0.844993	1	0.0181142	0.0470904
Anapc5	A0A0G2JDM7|A0A0G2JE03|Q3TWF7|Q3UFC2|Q8BTZ4|Q8BTZ4-2	Q8BTZ4	Anaphase-promoting complex subunit 5 OS=Mus musculus GN=Anapc5 PE=1 SV=1|Anaphase-promoting complex subunit 5 OS=Mus musculus GN=Anapc5 PE=1 SV=1|Anaphase-promoting complex subunit 5 OS=Mus musculus GN=Anapc5 PE=1 SV=1|Anaphase-promoting complex subunit 5 OS=Mus musculus GN=Anapc5 PE=1 SV=1|Anaphase-promoting complex subunit 5 OS=Mus musculus GN=Anapc5 PE=1 SV=1|Isoform 2 of Anaphase-promoting co…	7.0686	0.210043	1.15672		25.2482	3.8752	0.0100809	0.0308689	-3.32273	0.288174	0.814095	1	0.0100809	0.0308689
Rbm12b2|Rbm12b1	Q66JV4|Q80YR9	Q66JV4	RNA-binding protein 12B-B OS=Mus musculus GN=Rbm12b2 PE=2 SV=2|RNA-binding protein 12B-A OS=Mus musculus GN=Rbm12b1 PE=1 SV=2	6.91295	0.209932	1.15663		24.3368	1.87191	0.115804	0.186277	-5.96006	0.607906	0.902322	1	0.115804	0.186277
Smarce1	O54941	O54941	SWI/SNF-related matrix-associated actin-dependent regulator of chromatin subfamily E member 1 OS=Mus musculus GN=Smarce1 PE=1 SV=1	7.13194	0.209698	1.15645		24.4434	2.27798	0.0678196	0.122567	-5.40808	0.532389	0.889991	1	0.0678196	0.122567
Psip1	A2BI12|Q99JF8|Q99JF8-2	A2BI12	PC4 and SFRS1-interacting protein OS=Mus musculus GN=Psip1 PE=1 SV=1|PC4 and SFRS1-interacting protein OS=Mus musculus GN=Psip1 PE=1 SV=1|Isoform 2 of PC4 and SFRS1-interacting protein OS=Mus musculus GN=Psip1	8.44218	0.209681	1.15643		27.8889	3.74544	0.0116002	0.034057	-3.48003	0.304622	0.82235	1	0.0116002	0.034057
Rhot1	Q8BG51	Q8BG51	Mitochondrial Rho GTPase 1 OS=Mus musculus GN=Rhot1 PE=1 SV=1	7.3322	0.209281	1.15611		23.9346	2.3267	0.0636583	0.11676	-5.34136	0.523659	0.888362	1	0.0636583	0.11676
G3bp2	P97379-2	P97379	Isoform B of Ras GTPase-activating protein-binding protein 2 OS=Mus musculus GN=G3bp2	7.68034	0.208852	1.15577		25.5535	2.13953	0.081289	0.140338	-5.59748	0.557596	0.894439	1	0.081289	0.140338
Cdk5rap2	Q5SP75|Q8K389	Q5SP75	CDK5 regulatory subunit-associated protein 2 (Fragment) OS=Mus musculus GN=Cdk5rap2 PE=1 SV=2|CDK5 regulatory subunit-associated protein 2 OS=Mus musculus GN=Cdk5rap2 PE=1 SV=3	7.32919	0.208812	1.15574		26.8406	3.81368	0.0107712	0.0323859	-3.39699	0.295896	0.818064	1	0.0107712	0.0323859
Zswim8	Q3UHH1|Q3UHH1-3	Q3UHH1	Zinc finger SWIM domain-containing protein 8 OS=Mus musculus GN=Zswim8 PE=1 SV=1|Isoform 3 of Zinc finger SWIM domain-containing protein 8 OS=Mus musculus GN=Zswim8	6.78474	0.208514	1.1555		25.1572	3.11268	0.0238835	0.0572771	-4.28205	0.393581	0.856751	1	0.0238835	0.0572771
Arih2	Q3TK92|Q9Z1K6	Q3TK92	Ariadne homolog 2 (Drosophila), isoform CRA_a OS=Mus musculus GN=Arih2 PE=1 SV=1|E3 ubiquitin-protein ligase ARIH2 OS=Mus musculus GN=Arih2 PE=1 SV=1	7.25884	0.207945	1.15504		25.2244	3.7016	0.0121707	0.035234	-3.53374	0.310318	0.82504	1	0.0121707	0.035234
Rrp1	P56183	P56183	Ribosomal RNA processing protein 1 homolog A OS=Mus musculus GN=Rrp1 PE=1 SV=2	7.60484	0.20741	1.15461		26.2167	1.47384	0.196296	0.279298	-6.47641	0.686243	0.912497	1	0.196296	0.279298
Prpf38a	Q4FK66	Q4FK66	Pre-mRNA-splicing factor 38A OS=Mus musculus GN=Prpf38a PE=1 SV=1	6.92506	0.207234	1.15447		24.3849	3.69885	0.0122075	0.0352505	-3.53711	0.310677	0.825207	1	0.0122075	0.0352505
Fbxo22	Q78JE5	Q78JE5	F-box only protein 22 OS=Mus musculus GN=Fbxo22 PE=1 SV=2	7.5767	0.207101	1.15437		25.0511	3.19458	0.0216756	0.0534132	-4.17515	0.381254	0.852801	1	0.0216756	0.0534132
Apobr	Q8VBT6	Q8VBT6	Apolipoprotein B receptor OS=Mus musculus GN=Apobr PE=1 SV=1	7.05998	0.206768	1.1541		25.7607	3.37282	0.017614	0.0462245	-3.94555	0.355256	0.843713	1	0.017614	0.0462245
Map2k7	Q8CE90|Q8CE90-2|Q8CE90-3|Q8CE90-4|Q8CE90-5|Q8CE90-6|Q8CE90-7|Q8CE90-8	Q8CE90	Dual specificity mitogen-activated protein kinase kinase 7 OS=Mus musculus GN=Map2k7 PE=1 SV=1|Isoform 2 of Dual specificity mitogen-activated protein kinase kinase 7 OS=Mus musculus GN=Map2k7|Isoform 3 of Dual specificity mitogen-activated protein kinase kinase 7 OS=Mus musculus GN=Map2k7|Isoform 4 of Dual specificity mitogen-activated protein kinase kinase 7 OS=Mus musculus GN=Map2k7|Isoform 5 …	6.59621	0.206764	1.1541		23.8969	3.43489	0.0164053	0.0436444	-3.86661	0.346471	0.840383	1	0.0164053	0.0436444
Atp7b	Q64446	Q64446	Copper-transporting ATPase 2 OS=Mus musculus GN=Atp7b PE=1 SV=2	6.31958	0.206583	1.15395		23.209	3.12519	0.0235306	0.0566407	-4.26566	0.391682	0.856157	1	0.0235306	0.0566407
Taco1	Q8K0Z7	Q8K0Z7	Translational activator of cytochrome c oxidase 1 OS=Mus musculus GN=Taco1 PE=1 SV=1	6.94203	0.206492	1.15388		24.4711	3.41723	0.0167396	0.0444301	-3.88902	0.348957	0.841339	1	0.0167396	0.0444301
App	P12023	P12023	Amyloid beta A4 protein OS=Mus musculus GN=App PE=1 SV=3	6.8902	0.206301	1.15373		23.7271	3.15402	0.0227393	0.0553082	-4.22798	0.387328	0.854775	1	0.0227393	0.0553082
Scrib	Q80U72|Q80U72-2|Q80U72-3|Q80U72-4	Q80U72	Protein scribble homolog OS=Mus musculus GN=Scrib PE=1 SV=2|Isoform 2 of Protein scribble homolog OS=Mus musculus GN=Scrib|Isoform 3 of Protein scribble homolog OS=Mus musculus GN=Scrib|Isoform 4 of Protein scribble homolog OS=Mus musculus GN=Scrib	6.88568	0.206183	1.15363		25.0788	1.79859	0.127654	0.200673	-6.05785	0.622036	0.904329	1	0.127654	0.200673
Mars2	A2RT28|Q499X9	A2RT28	Methionine--tRNA ligase, mitochondrial OS=Mus musculus GN=Mars2 PE=1 SV=1|Methionine--tRNA ligase, mitochondrial OS=Mus musculus GN=Mars2 PE=1 SV=2	7.08815	0.205949	1.15344		25.1111	2.86332	0.0322927	0.0710855	-4.61244	0.432574	0.867959	1	0.0322927	0.0710855
Cbx1	P83917	P83917	Chromobox protein homolog 1 OS=Mus musculus GN=Cbx1 PE=1 SV=1	7.6415	0.205827	1.15335		26.0743	1.62484	0.160787	0.240974	-6.28528	0.656069	0.908839	1	0.160787	0.240974
Vps28	Q9D1C8	Q9D1C8	Vacuolar protein sorting-associated protein 28 homolog OS=Mus musculus GN=Vps28 PE=1 SV=1	6.73568	0.205818	1.15334		23.9964	2.47053	0.0528821	0.101877	-5.14452	0.498319	0.883347	1	0.0528821	0.101877
Ccs	Q543K2|Q9WU84	Q543K2	Copper chaperone for superoxide dismutase OS=Mus musculus GN=Ccs PE=1 SV=1|Copper chaperone for superoxide dismutase OS=Mus musculus GN=Ccs PE=1 SV=1	7.15887	0.205771	1.1533		23.6272	3.19577	0.0216453	0.0533845	-4.17361	0.381076	0.852743	1	0.0216453	0.0533845
Tsn	Q545E6|Q62348	Q545E6	RNA-binding protein OS=Mus musculus GN=Tsn PE=1 SV=1|Translin OS=Mus musculus GN=Tsn PE=1 SV=1	7.82482	0.205764	1.1533		25.9349	3.29011	0.0193823	0.0492859	-4.05156	0.367178	0.848016	1	0.0193823	0.0492859
Anln	Q8K298	Q8K298	Actin-binding protein anillin OS=Mus musculus GN=Anln PE=1 SV=2	7.68341	0.205649	1.15321		27.1952	2.16589	0.0785238	0.136659	-5.56148	0.552753	0.893613	1	0.0785238	0.136659
Cul4a	Q3TCH7	Q3TCH7	Cullin-4A OS=Mus musculus GN=Cul4a PE=1 SV=1	7.3031	0.205504	1.15309		26.7053	3.87755	0.0100555	0.0308235	-3.3199	0.287881	0.813941	1	0.0100555	0.0308235
Abcb10	Q9JI39	Q9JI39	ATP-binding cassette sub-family B member 10, mitochondrial OS=Mus musculus GN=Abcb10 PE=1 SV=1	6.49575	0.20484	1.15256		23.6417	3.69546	0.0122531	0.0353088	-3.54128	0.31112	0.825413	1	0.0122531	0.0353088
Thoc5	Q8BKT7	Q8BKT7	THO complex subunit 5 homolog OS=Mus musculus GN=Thoc5 PE=1 SV=2	7.53274	0.204754	1.15249		26.9334	1.83094	0.122282	0.194435	-6.01481	0.615785	0.903451	1	0.122282	0.194435
Brip1	Q5SXJ3	Q5SXJ3	Fanconi anemia group J protein homolog OS=Mus musculus GN=Brip1 PE=2 SV=1	6.68613	0.204218	1.15206		25.2483	2.20706	0.0743997	0.131169	-5.50518	0.54523	0.892303	1	0.0743997	0.131169
Ptbp1	Q8BGJ5|Q922I7	Q8BGJ5	MCG13402, isoform CRA_a OS=Mus musculus GN=Ptbp1 PE=1 SV=1|MCG13402, isoform CRA_c OS=Mus musculus GN=Ptbp1 PE=1 SV=1	8.10705	0.204045	1.15192		25.7615	2.81002	0.0344847	0.0744184	-4.68392	0.441189	0.870203	1	0.0344847	0.0744184
Ppm1a	P49443	P49443	Protein phosphatase 1A OS=Mus musculus GN=Ppm1a PE=1 SV=1	7.1724	0.204023	1.15191		24.9351	3.21085	0.0212645	0.0527127	-4.15402	0.378833	0.852	1	0.0212645	0.0527127
Q6PIU9	Q6PIU9	Q6PIU9	Uncharacterized protein FLJ45252 homolog OS=Mus musculus PE=1 SV=2	7.2326	0.203936	1.15184		25.5378	3.69641	0.0122404	0.0352896	-3.54012	0.310997	0.825355	1	0.0122404	0.0352896
Q3TQI7	Q3TQI7	Q3TQI7	Uncharacterized protein C9orf78 homolog OS=Mus musculus PE=1 SV=2	7.45673	0.203649	1.15161		25.802	2.87932	0.031665	0.0700324	-4.59104	0.430007	0.867275	1	0.031665	0.0700324
Zmat2	Q9CPW7	Q9CPW7	Zinc finger matrin-type protein 2 OS=Mus musculus GN=Zmat2 PE=2 SV=1	7.28774	0.203517	1.1515		25.662	2.98172	0.0279505	0.0643006	-4.45469	0.413787	0.862786	1	0.0279505	0.0643006
Impad1	Q80V26	Q80V26	Inositol monophosphatase 3 OS=Mus musculus GN=Impad1 PE=1 SV=1	7.74826	0.203127	1.15119		25.3047	3.32073	0.0187054	0.0481328	-4.0122	0.362735	0.84644	1	0.0187054	0.0481328
Ap2m1	P84091|Q5FWI9	P84091	AP-2 complex subunit mu OS=Mus musculus GN=Ap2m1 PE=1 SV=1|AP-2 complex subunit mu OS=Mus musculus GN=Ap2m1 PE=1 SV=1	8.47755	0.202989	1.15108		27.0349	1.63942	0.157708	0.237584	-6.26647	0.653185	0.908474	1	0.157708	0.237584
Mettl16	Q5SW15|Q9CQG2	Q5SW15	Methyltransferase-like protein OS=Mus musculus GN=Mettl16 PE=1 SV=1|Methyltransferase-like protein 16 OS=Mus musculus GN=Mettl16 PE=1 SV=1	7.49568	0.20297	1.15107		25.2466	3.406	0.016956	0.044874	-3.90329	0.350543	0.841944	1	0.016956	0.044874
Smurf2	A2A5Z6|A2A5Z6-2	A2A5Z6	E3 ubiquitin-protein ligase SMURF2 OS=Mus musculus GN=Smurf2 PE=1 SV=1|Isoform 2 of E3 ubiquitin-protein ligase SMURF2 OS=Mus musculus GN=Smurf2	6.63209	0.202943	1.15104		23.054	1.23923	0.266401	0.355324	-6.75637	0.734116	0.917734	1	0.266401	0.355324
Vps33b	P59016	P59016	Vacuolar protein sorting-associated protein 33B OS=Mus musculus GN=Vps33b PE=1 SV=1	7.33165	0.202908	1.15102		26.4717	3.4448	0.0162212	0.0433471	-3.85406	0.345083	0.839843	1	0.0162212	0.0433471
Cntrob	Q8CB62|Q8CB62-2	Q8CB62	Centrobin OS=Mus musculus GN=Cntrob PE=2 SV=2|Isoform 2 of Centrobin OS=Mus musculus GN=Cntrob	6.78685	0.202818	1.15094		24.289	3.63019	0.0131692	0.0371574	-3.62184	0.319744	0.829318	1	0.0131692	0.0371574
Uri1	A0A0U1RPG9|Q3TLD5	Q3TLD5	Unconventional prefoldin RPB5 interactor (Fragment) OS=Mus musculus GN=Uri1 PE=1 SV=1|Unconventional prefoldin RPB5 interactor OS=Mus musculus GN=Uri1 PE=1 SV=2	6.96803	0.202808	1.15094		23.7788	3.69995	0.0121928	0.0352505	-3.53577	0.310533	0.82514	1	0.0121928	0.0352505
Eif2b4	D3Z780|Q61749|Q61749-2	D3Z780	Translation initiation factor eIF-2B subunit delta OS=Mus musculus GN=Eif2b4 PE=1 SV=1|Translation initiation factor eIF-2B subunit delta OS=Mus musculus GN=Eif2b4 PE=1 SV=2|Isoform 2 of Translation initiation factor eIF-2B subunit delta OS=Mus musculus GN=Eif2b4	7.59067	0.202728	1.15087		24.8928	3.66127	0.0127237	0.0363232	-3.58341	0.315619	0.827472	1	0.0127237	0.0363232
Smarcad1	Q04692	Q04692	SWI/SNF-related matrix-associated actin-dependent regulator of chromatin subfamily A containing DEAD/H box 1 OS=Mus musculus GN=Smarcad1 PE=1 SV=2	7.45084	0.202421	1.15063		26.9321	2.92603	0.0299071	0.067434	-4.5287	0.422562	0.865252	1	0.0299071	0.067434
Zkscan3	A0A0R4J1L3|Q91VW9	Q91VW9	Zinc finger protein with KRAB and SCAN domains 3 OS=Mus musculus GN=Zkscan3 PE=1 SV=1|Zinc finger protein with KRAB and SCAN domains 3 OS=Mus musculus GN=Zkscan3 PE=1 SV=1	6.43253	0.202156	1.15042		22.3582	2.75388	0.0369713	0.0778633	-4.7595	0.45037	0.872511	1	0.0369713	0.0778633
Mis12	Q9CY25	Q9CY25	Protein MIS12 homolog OS=Mus musculus GN=Mis12 PE=2 SV=1	5.9365	0.202139	1.1504		22.0928	2.87919	0.0316699	0.0700324	-4.59121	0.430027	0.867281	1	0.0316699	0.0700324
Acad8	A0A0R4J0P1|D3YTT4|Q9D7B6	D3YTT4	Acyl-Coenzyme A dehydrogenase family, member 8 OS=Mus musculus GN=Acad8 PE=1 SV=1|Isobutyryl-CoA dehydrogenase, mitochondrial OS=Mus musculus GN=Acad8 PE=1 SV=1|Isobutyryl-CoA dehydrogenase, mitochondrial OS=Mus musculus GN=Acad8 PE=1 SV=2	6.97758	0.20211	1.15038		24.8795	3.8112	0.0108001	0.0324392	-3.39999	0.296209	0.818222	1	0.0108001	0.0324392
Cenpv	Q9CXS4	Q9CXS4	Centromere protein V OS=Mus musculus GN=Cenpv PE=1 SV=2	7.67728	0.202103	1.15037		25.5064	2.21412	0.073715	0.130201	-5.49551	0.543944	0.892076	1	0.073715	0.130201
Sdf2l1	Q9ESP1	Q9ESP1	Stromal cell-derived factor 2-like protein 1 OS=Mus musculus GN=Sdf2l1 PE=1 SV=2	7.04715	0.202086	1.15036		24.9414	3.52052	0.0148877	0.0407033	-3.75862	0.334583	0.835643	1	0.0148877	0.0407033
Cdc23	A0A0R4J1W7|Q8BGZ4|Q8BGZ4-2	Q8BGZ4	CDC23 (Cell division cycle 23, yeast, homolog), isoform CRA_c OS=Mus musculus GN=Cdc23 PE=1 SV=1|Cell division cycle protein 23 homolog OS=Mus musculus GN=Cdc23 PE=1 SV=2|Isoform 2 of Cell division cycle protein 23 homolog OS=Mus musculus GN=Cdc23	7.45876	0.202082	1.15036		25.9307	3.54122	0.0145448	0.0399914	-3.73266	0.331748	0.834471	1	0.0145448	0.0399914
Bcl9l	Q67FY2|Q67FY2-2	Q67FY2	B-cell CLL/lymphoma 9-like protein OS=Mus musculus GN=Bcl9l PE=1 SV=1|Isoform 2 of B-cell CLL/lymphoma 9-like protein OS=Mus musculus GN=Bcl9l	6.37469	0.201999	1.15029		22.9416	3.61874	0.0133377	0.0375236	-3.63604	0.321272	0.829991	1	0.0133377	0.0375236
Agfg1	A0A087WNV1|A0A087WR52|A0A087WSR7|Q8K2K6|Q8K2K6-1|Q8K2K6-3	Q8K2K6	Arf-GAP domain and FG repeat-containing protein 1 OS=Mus musculus GN=Agfg1 PE=1 SV=1|Arf-GAP domain and FG repeat-containing protein 1 (Fragment) OS=Mus musculus GN=Agfg1 PE=1 SV=1|Arf-GAP domain and FG repeat-containing protein 1 OS=Mus musculus GN=Agfg1 PE=1 SV=1|Arf-GAP domain and FG repeat-containing protein 1 OS=Mus musculus GN=Agfg1 PE=1 SV=2|Isoform 1 of Arf-GAP domain and FG repeat-contai…	7.98356	0.20199	1.15028		26.1106	2.39973	0.0579203	0.108663	-5.24135	0.51071	0.885855	1	0.0579203	0.108663
Ctnnb1	Q02248	Q02248	Catenin beta-1 OS=Mus musculus GN=Ctnnb1 PE=1 SV=1	8.22599	0.20197	1.15027		27.3745	1.27542	0.254277	0.342842	-6.7148	0.726659	0.916959	1	0.254277	0.342842
Kdm1b	Q8CIG3	Q8CIG3	Lysine-specific histone demethylase 1B OS=Mus musculus GN=Kdm1b PE=1 SV=1	7.35132	0.20195	1.15025		25.8202	3.34383	0.0182124	0.0472192	-3.9826	0.359407	0.845238	1	0.0182124	0.0472192
Oxsm	D3Z6F9|Q9D404	Q9D404	3-oxoacyl-[acyl-carrier-protein] synthase, mitochondrial (Fragment) OS=Mus musculus GN=Oxsm PE=1 SV=1|3-oxoacyl-[acyl-carrier-protein] synthase, mitochondrial OS=Mus musculus GN=Oxsm PE=1 SV=1	6.48957	0.201858	1.15018		22.1992	3.46718	0.0158136	0.0425351	-3.82577	0.341958	0.838616	1	0.0158136	0.0425351
Renbp	P82343|P82343-2	P82343	N-acylglucosamine 2-epimerase OS=Mus musculus GN=Renbp PE=1 SV=3|Isoform 2 of N-acylglucosamine 2-epimerase OS=Mus musculus GN=Renbp	7.54451	0.201659	1.15002		26.3095	2.96506	0.0285207	0.0649445	-4.47679	0.4164	0.86353	1	0.0285207	0.0649445
Serpinb6d	Q3UWK8	Q3UWK8	MCG20280 OS=Mus musculus GN=Serpinb6d PE=2 SV=1	6.88757	0.201505	1.1499		24.023	2.2465	0.0706614	0.126322	-5.45119	0.53807	0.891026	1	0.0706614	0.126322
Ap5b1	Q3TAP4	Q3TAP4	AP-5 complex subunit beta-1 OS=Mus musculus GN=Ap5b1 PE=1 SV=1	6.13599	0.201123	1.14959		22.9523	3.77781	0.0111983	0.0332249	-3.44056	0.300462	0.820332	1	0.0111983	0.0332249
Gcn1	E9PVA8	E9PVA8	eIF-2-alpha kinase activator GCN1 OS=Mus musculus GN=Gcn1 PE=1 SV=1	7.47423	0.200946	1.14945		26.805	1.29102	0.249204	0.337729	-6.69668	0.723451	0.916622	1	0.249204	0.337729
Bet1	O35623	O35623	BET1 homolog OS=Mus musculus GN=Bet1 PE=1 SV=1	6.39207	0.200907	1.14942		23.91	1.80608	0.126389	0.199334	-6.0479	0.620586	0.904127	1	0.126389	0.199334
Stx8	O88983	O88983	Syntaxin-8 OS=Mus musculus GN=Stx8 PE=1 SV=1	6.99412	0.200865	1.14939		23.825	3.60313	0.0135714	0.0378859	-3.65543	0.323365	0.830905	1	0.0135714	0.0378859
Anapc10	Q8K2H6	Q8K2H6	Anaphase-promoting complex subunit 10 OS=Mus musculus GN=Anapc10 PE=1 SV=1	6.8012	0.200786	1.14932		23.9498	2.31319	0.0647847	0.118259	-5.35986	0.526073	0.888817	1	0.0647847	0.118259
Tubgcp5	Q8BKN5|Q8BKN5-3	Q8BKN5	Gamma-tubulin complex component 5 OS=Mus musculus GN=Tubgcp5 PE=2 SV=2|Isoform 3 of Gamma-tubulin complex component 5 OS=Mus musculus GN=Tubgcp5	7.13081	0.200688	1.14925		25.4878	2.22672	0.0725107	0.128697	-5.47827	0.541655	0.891669	1	0.0725107	0.128697
Vti1b	Q91XH6	Q91XH6	Vesicle transport through interaction with t-SNAREs 1B homolog OS=Mus musculus GN=Vti1b PE=1 SV=1	7.07958	0.20043	1.14904		24.8541	3.50034	0.0152305	0.0413685	-3.78397	0.33736	0.836775	1	0.0152305	0.0413685
Rragc	Q99K70	Q99K70	Ras-related GTP-binding protein C OS=Mus musculus GN=Rragc PE=1 SV=1	7.51866	0.200396	1.14901		26.4148	2.43072	0.0556546	0.105751	-5.19895	0.505267	0.884767	1	0.0556546	0.105751
Nepro	Q8R2U2	Q8R2U2	Protein nepro OS=Mus musculus GN=Nepro PE=2 SV=1	6.68535	0.200364	1.14899		22.9945	3.63789	0.0130572	0.0369489	-3.61231	0.318719	0.828862	1	0.0130572	0.0369489
Rpl37	Q9D823	Q9D823	60S ribosomal protein L37 OS=Mus musculus GN=Rpl37 PE=3 SV=3	8.60731	0.200188	1.14885		27.7525	2.26	0.0694278	0.124695	-5.43271	0.535631	0.890584	1	0.0694278	0.124695
Isoc2a	P85094	P85094	Isochorismatase domain-containing protein 2A OS=Mus musculus GN=Isoc2a PE=1 SV=1	7.64009	0.20005	1.14874		25.3069	2.52978	0.0490262	0.0963631	-5.06361	0.488073	0.881189	1	0.0490262	0.0963631
Recql	Q9Z129	Q9Z129	ATP-dependent DNA helicase Q1 OS=Mus musculus GN=Recql PE=1 SV=2	7.15114	0.199958	1.14867		25.5061	2.75756	0.0368024	0.0777056	-4.75454	0.449765	0.872362	1	0.0368024	0.0777056
Csnk1d	Q9DC28	Q9DC28	Casein kinase I isoform delta OS=Mus musculus GN=Csnk1d PE=1 SV=2	7.31839	0.1995	1.1483		23.9588	2.96061	0.0286751	0.0652196	-4.4827	0.4171	0.863728	1	0.0286751	0.0652196
Capza2	P47754|Q5DQJ3	P47754	F-actin-capping protein subunit alpha-2 OS=Mus musculus GN=Capza2 PE=1 SV=3|Capping protein (Actin filament) muscle Z-line, alpha 2, isoform CRA_c OS=Mus musculus GN=Capza2 PE=1 SV=1	8.04319	0.199478	1.14828		25.2437	2.03839	0.0928799	0.156313	-5.7353	0.576371	0.897526	1	0.0928799	0.156313
Zcchc6	E9PUA2|Q5BLK4	E9PUA2	Terminal uridylyltransferase 7 OS=Mus musculus GN=Zcchc6 PE=1 SV=1|Terminal uridylyltransferase 7 OS=Mus musculus GN=Zcchc6 PE=1 SV=3	7.02443	0.199457	1.14827		24.6469	3.74165	0.0116483	0.034158	-3.48466	0.305112	0.822584	1	0.0116483	0.034158
Pikfyve	D3Z5N5|Q9Z1T6|Q9Z1T6-1	D3Z5N5	1-phosphatidylinositol 3-phosphate 5-kinase OS=Mus musculus GN=Pikfyve PE=1 SV=2|1-phosphatidylinositol 3-phosphate 5-kinase OS=Mus musculus GN=Pikfyve PE=1 SV=3|Isoform 2 of 1-phosphatidylinositol 3-phosphate 5-kinase OS=Mus musculus GN=Pikfyve	6.82111	0.199364	1.14819		25.7181	1.59694	0.166845	0.247439	-6.32112	0.661605	0.909533	1	0.166845	0.247439
Os9	Q8K2C7|Q8K2C7-2	Q8K2C7	Protein OS-9 OS=Mus musculus GN=Os9 PE=1 SV=2|Isoform 2 of Protein OS-9 OS=Mus musculus GN=Os9	6.81954	0.199363	1.14819		24.075	2.59391	0.0451916	0.0907576	-4.97624	0.477112	0.878791	1	0.0451916	0.0907576
Sppl2a	Q9JJF9	Q9JJF9	Signal peptide peptidase-like 2A OS=Mus musculus GN=Sppl2a PE=1 SV=2	7.10276	0.199328	1.14816		24.3234	2.52174	0.0495315	0.0969958	-5.07459	0.489457	0.881486	1	0.0495315	0.0969958
Capg	Q99LB4	Q99LB4	Capping protein (Actin filament), gelsolin-like OS=Mus musculus GN=Capg PE=1 SV=1	7.74138	0.199151	1.14802		25.9965	1.68451	0.148547	0.226472	-6.20795	0.644296	0.907328	1	0.148547	0.226472
Pkp2	Q9CQ73	Q9CQ73	Plakophilin 2 OS=Mus musculus GN=Pkp2 PE=1 SV=1	6.72506	0.199048	1.14794		24.114	2.60152	0.044759	0.0901689	-4.9659	0.475822	0.878502	1	0.044759	0.0901689
Stxbp2	F8WGM5|Q548T0|Q64324	F8WGM5	Syntaxin-binding protein 2 (Fragment) OS=Mus musculus GN=Stxbp2 PE=1 SV=1|Syntaxin binding protein 2, isoform CRA_e OS=Mus musculus GN=Stxbp2 PE=1 SV=1|Syntaxin-binding protein 2 OS=Mus musculus GN=Stxbp2 PE=1 SV=1	7.27809	0.198976	1.14788		25.9405	2.96953	0.0283667	0.0647459	-4.47087	0.415699	0.863331	1	0.0283667	0.0647459
Pfkfb2	A0A087WRG0|A0A087WRM7|B2Z893|P70265|Q6GTL7	B2Z893	6-phosphofructo-2-kinase/fructose-2,6-bisphosphatase 2 OS=Mus musculus GN=Pfkfb2 PE=1 SV=1|6-phosphofructo-2-kinase/fructose-2,6-bisphosphatase 2 OS=Mus musculus GN=Pfkfb2 PE=1 SV=1|6-phosphofructo-2-kinase/fructose-2, 6-biphosphatase 2, isoform CRA_a OS=Mus musculus GN=Pfkfb2 PE=1 SV=1|6-phosphofructo-2-kinase/fructose-2,6-bisphosphatase 2 OS=Mus musculus GN=Pfkfb2 PE=1 SV=2|6-phosphofructo-2-ki…	6.68939	0.198931	1.14785		24.3566	2.50357	0.0506936	0.0986406	-5.09939	0.492592	0.882151	1	0.0506936	0.0986406
Cir1	Q9DA19	Q9DA19	Corepressor interacting with RBPJ 1 OS=Mus musculus GN=Cir1 PE=1 SV=2	6.74005	0.198314	1.14736		23.4412	1.85403	0.118587	0.189581	-5.98398	0.611339	0.902817	1	0.118587	0.189581
Trerf1	Q8BXJ2|Q8BXJ2-2|Q8BXJ2-4	Q8BXJ2	Transcriptional-regulating factor 1 OS=Mus musculus GN=Trerf1 PE=1 SV=1|Isoform 2 of Transcriptional-regulating factor 1 OS=Mus musculus GN=Trerf1|Isoform 4 of Transcriptional-regulating factor 1 OS=Mus musculus GN=Trerf1	6.24984	0.198057	1.14715		23.0485	2.54723	0.0479495	0.094791	-5.03982	0.485078	0.880543	1	0.0479495	0.094791
Tax1bp3	Q9DBG9	Q9DBG9	Tax1-binding protein 3 OS=Mus musculus GN=Tax1bp3 PE=1 SV=1	7.65447	0.197941	1.14706		24.6267	3.27474	0.0197323	0.0500012	-4.07137	0.369421	0.848799	1	0.0197323	0.0500012
Cep162	Q6ZQ06	Q6ZQ06	Centrosomal protein of 162 kDa OS=Mus musculus GN=Cep162 PE=1 SV=2	5.88299	0.197642	1.14682		22.4961	2.55451	0.0475077	0.094238	-5.0299	0.483831	0.880272	1	0.0475077	0.094238
Arhgap17	Q3UIA2|Q3UIA2-2	Q3UIA2	Rho GTPase-activating protein 17 OS=Mus musculus GN=Arhgap17 PE=1 SV=1|Isoform 2 of Rho GTPase-activating protein 17 OS=Mus musculus GN=Arhgap17	7.40599	0.197522	1.14673		25.5936	3.46995	0.0157639	0.0424408	-3.82227	0.341572	0.838463	1	0.0157639	0.0424408
Jph2	Q9ET78	Q9ET78	Junctophilin-2 OS=Mus musculus GN=Jph2 PE=1 SV=2	6.01431	0.197434	1.14666		21.0181	2.51377	0.0500377	0.0976584	-5.08547	0.490831	0.881778	1	0.0500377	0.0976584
H2afy	Q9QZQ8	Q9QZQ8	Core histone macro-H2A.1 OS=Mus musculus GN=H2afy PE=1 SV=3	8.0753	0.197325	1.14657		26.6458	3.15062	0.0228312	0.0554568	-4.23243	0.387841	0.854939	1	0.0228312	0.0554568
Cwf19l2	Q8BG79	Q8BG79	CWF19-like protein 2 OS=Mus musculus GN=Cwf19l2 PE=1 SV=1	6.84738	0.197253	1.14651		24.0703	2.2318	0.0720312	0.128119	-5.47132	0.540734	0.891505	1	0.0720312	0.128119
Micu1	Q8VCX5|Q8VCX5-2|Q8VCX5-3	Q8VCX5	Calcium uptake protein 1, mitochondrial OS=Mus musculus GN=Micu1 PE=1 SV=1|Isoform 2 of Calcium uptake protein 1, mitochondrial OS=Mus musculus GN=Micu1|Isoform 3 of Calcium uptake protein 1, mitochondrial OS=Mus musculus GN=Micu1	7.40718	0.197026	1.14633		25.4709	2.98059	0.027989	0.0643118	-4.45619	0.413964	0.862837	1	0.027989	0.0643118
Rnf126	Q3U3G2|Q91YL2	Q3U3G2	E3 ubiquitin-protein ligase RNF126 OS=Mus musculus GN=Rnf126 PE=1 SV=1|E3 ubiquitin-protein ligase RNF126 OS=Mus musculus GN=Rnf126 PE=1 SV=1	6.97311	0.19702	1.14633		22.4892	3.39429	0.0171851	0.0453437	-3.91819	0.352202	0.842571	1	0.0171851	0.0453437
Brox	Q8K2Q7	Q8K2Q7	BRO1 domain-containing protein BROX OS=Mus musculus GN=Brox PE=1 SV=1	7.43872	0.196947	1.14627		25.3041	3.44089	0.0162936	0.0434869	-3.85902	0.345631	0.840056	1	0.0162936	0.0434869
Map2k4	P47809|Q543X6	P47809	Dual specificity mitogen-activated protein kinase kinase 4 OS=Mus musculus GN=Map2k4 PE=1 SV=2|Dual-specificity mitogen-activated protein kinase kinase 4 OS=Mus musculus GN=Map2k4 PE=1 SV=1	7.28746	0.196874	1.14621		25.6723	2.91697	0.0302394	0.0677969	-4.54077	0.424	0.865647	1	0.0302394	0.0677969
Phf6	Q9D4J7	Q9D4J7	PHD finger protein 6 OS=Mus musculus GN=Phf6 PE=1 SV=1	7.47696	0.196422	1.14585		25.5413	3.61642	0.0133723	0.0375535	-3.63893	0.321584	0.830128	1	0.0133723	0.0375535
Zfp106|Znf106	E9Q7S1|O88466|R4GML0	E9Q7S1	Zinc finger protein 106 OS=Mus musculus GN=Zfp106 PE=1 SV=1|Zinc finger protein 106 OS=Mus musculus GN=Znf106 PE=1 SV=3|Zinc finger protein 106 OS=Mus musculus GN=Zfp106 PE=1 SV=1	6.72926	0.196245	1.14571		24.4583	3.21571	0.0211435	0.0525022	-4.14771	0.378112	0.85176	1	0.0211435	0.0525022
Orc6	Q66JV6|Q9WUJ8	Q66JV6	Origin recognition complex subunit 6 OS=Mus musculus GN=Orc6 PE=1 SV=1|Origin recognition complex subunit 6 OS=Mus musculus GN=Orc6 PE=1 SV=1	6.63329	0.196232	1.1457		23.3666	1.58741	0.168963	0.249184	-6.33331	0.663499	0.909768	1	0.168963	0.249184
Klhl11	Q8CE33|Q8CE33-2	Q8CE33	Kelch-like protein 11 OS=Mus musculus GN=Klhl11 PE=1 SV=1|Isoform 2 of Kelch-like protein 11 OS=Mus musculus GN=Klhl11	6.49499	0.196082	1.14558		23.5407	3.30432	0.0190648	0.0487015	-4.03328	0.365111	0.847287	1	0.0190648	0.0487015
Ttc28	A0A0A0MQN9|Q80XJ3	Q80XJ3	Tetratricopeptide repeat protein 28 OS=Mus musculus GN=Ttc28 PE=1 SV=1|Tetratricopeptide repeat protein 28 OS=Mus musculus GN=Ttc28 PE=1 SV=3	6.50157	0.195578	1.14518		24.0525	3.6752	0.0125296	0.0359276	-3.56622	0.313781	0.826636	1	0.0125296	0.0359276
Pfkfb1	P70266|P70266-2	P70266	6-phosphofructo-2-kinase/fructose-2,6-bisphosphatase 1 OS=Mus musculus GN=Pfkfb1 PE=1 SV=2|Isoform 2 of 6-phosphofructo-2-kinase/fructose-2,6-bisphosphatase 1 OS=Mus musculus GN=Pfkfb1	6.20637	0.195483	1.14511		22.9898	3.69297	0.0122867	0.0353706	-3.54434	0.311446	0.825563	1	0.0122867	0.0353706
Hltf	Q6PCN7	Q6PCN7	Helicase-like transcription factor OS=Mus musculus GN=Hltf PE=1 SV=1	6.63161	0.194899	1.14464		24.4982	2.94853	0.0290991	0.0660033	-4.49876	0.419004	0.864263	1	0.0290991	0.0660033
Slc35e1	Q8CD26	Q8CD26	Solute carrier family 35 member E1 OS=Mus musculus GN=Slc35e1 PE=1 SV=2	6.74529	0.194831	1.14459		23.2467	3.46584	0.0158375	0.0425798	-3.82745	0.342143	0.838689	1	0.0158375	0.0425798
Adal	Q80SY6|Q80SY6-2|Q80SY6-4|Z4YL50	Q80SY6	Adenosine deaminase-like protein OS=Mus musculus GN=Adal PE=2 SV=1|Isoform 2 of Adenosine deaminase-like protein OS=Mus musculus GN=Adal|Isoform 4 of Adenosine deaminase-like protein OS=Mus musculus GN=Adal|Adenosine deaminase-like protein OS=Mus musculus GN=Adal PE=1 SV=1	6.48372	0.194766	1.14454		23.4811	2.76069	0.0366592	0.0775599	-4.75031	0.44925	0.872234	1	0.0366592	0.0775599
Ptges	Q9JM51	Q9JM51	Prostaglandin E synthase OS=Mus musculus GN=Ptges PE=1 SV=1	8.21669	0.194674	1.14447		24.888	1.66409	0.15263	0.231251	-6.23453	0.648316	0.90785	1	0.15263	0.231251
Srek1	Q8BZX4|Q8BZX4-2	Q8BZX4	Splicing regulatory glutamine/lysine-rich protein 1 OS=Mus musculus GN=Srek1 PE=2 SV=1|Isoform 2 of Splicing regulatory glutamine/lysine-rich protein 1 OS=Mus musculus GN=Srek1	7.39308	0.194573	1.14439		25.3344	3.45708	0.015996	0.0428871	-3.83853	0.343365	0.839171	1	0.015996	0.0428871
Nos1ap	E9PYK5|Q9D3A8|Q9D3A8-2	Q9D3A8	Carboxyl-terminal PDZ ligand of neuronal nitric oxide synthase protein OS=Mus musculus GN=Nos1ap PE=1 SV=1|Carboxyl-terminal PDZ ligand of neuronal nitric oxide synthase protein OS=Mus musculus GN=Nos1ap PE=1 SV=3|Isoform 2 of Carboxyl-terminal PDZ ligand of neuronal nitric oxide synthase protein OS=Mus musculus GN=Nos1ap	6.81413	0.194474	1.14431		24.0232	3.34653	0.0181558	0.0471564	-3.97915	0.359019	0.845097	1	0.0181558	0.0471564
Mbtps1	Q9WTZ2	Q9WTZ2	Membrane-bound transcription factor site-1 protease OS=Mus musculus GN=Mbtps1 PE=1 SV=1	6.00137	0.19436	1.14422		22.0008	2.49079	0.0515281	0.0998635	-5.11684	0.494802	0.882616	1	0.0515281	0.0998635
Wdfy3	G3UYW1|Q6VNB8	G3UYW1	WD repeat and FYVE domain-containing protein 3 OS=Mus musculus GN=Wdfy3 PE=1 SV=1|WD repeat and FYVE domain-containing protein 3 OS=Mus musculus GN=Wdfy3 PE=1 SV=1	6.6557	0.194292	1.14416		25.3976	3.1883	0.0218367	0.0537228	-4.18332	0.382191	0.853109	1	0.0218367	0.0537228
Cdkn2c	Q60772	Q60772	Cyclin-dependent kinase 4 inhibitor C OS=Mus musculus GN=Cdkn2c PE=1 SV=1	6.73054	0.194052	1.14397		23.3021	2.07149	0.0889091	0.150765	-5.69028	0.570195	0.896531	1	0.0889091	0.150765
Parp12	Q8BZ20	Q8BZ20	Poly [ADP-ribose] polymerase 12 OS=Mus musculus GN=Parp12 PE=1 SV=3	7.16709	0.193785	1.14376		25.2712	3.39036	0.0172626	0.0454659	-3.92319	0.35276	0.842781	1	0.0172626	0.0454659
Sin3a	Q60520|Q60520-1	Q60520	Paired amphipathic helix protein Sin3a OS=Mus musculus GN=Sin3a PE=1 SV=3|Isoform 2 of Paired amphipathic helix protein Sin3a OS=Mus musculus GN=Sin3a	7.5201	0.193646	1.14365		26.8996	3.24051	0.0205373	0.0513954	-4.11558	0.374445	0.850525	1	0.0205373	0.0513954
Ndc80	Q9D0F1	Q9D0F1	Kinetochore protein NDC80 homolog OS=Mus musculus GN=Ndc80 PE=1 SV=1	7.19631	0.193383	1.14344		26.0653	3.04528	0.0258885	0.0607092	-4.37066	0.403905	0.8599	1	0.0258885	0.0607092
Nectin2	P32507	P32507	Nectin-2 OS=Mus musculus GN=Nectin2 PE=1 SV=2	6.32236	0.193155	1.14326		21.8626	2.39823	0.0580324	0.108808	-5.24341	0.510975	0.885907	1	0.0580324	0.108808
Abr	E9PUE7|Q5SSL4|Q5SSL4-2|Q5SSL4-4	E9PUE7	Active breakpoint cluster region-related protein OS=Mus musculus GN=Abr PE=1 SV=1|Active breakpoint cluster region-related protein OS=Mus musculus GN=Abr PE=1 SV=1|Isoform 2 of Active breakpoint cluster region-related protein OS=Mus musculus GN=Abr|Isoform 4 of Active breakpoint cluster region-related protein OS=Mus musculus GN=Abr	6.43887	0.192917	1.14307		23.2472	1.51469	0.186012	0.267942	-6.42543	0.678029	0.911531	1	0.186012	0.267942
Mast3	E9Q8S5	Q3U214	Microtubule-associated serine/threonine-protein kinase 3 OS=Mus musculus GN=Mast3 PE=1 SV=1	6.24511	0.192757	1.14295		22.5403	3.25335	0.0202311	0.0509102	-4.09897	0.372555	0.84988	1	0.0202311	0.0509102
Nck1	Q99M51	Q99M51	Cytoplasmic protein NCK1 OS=Mus musculus GN=Nck1 PE=1 SV=1	7.52338	0.192693	1.1429		25.8308	2.98507	0.0278377	0.0641424	-4.45025	0.413263	0.862636	1	0.0278377	0.0641424
Atp6v0a1	K3W4T3|Q9Z1G4|Q9Z1G4-2|Q9Z1G4-3	K3W4T3	V-type proton ATPase subunit a OS=Mus musculus GN=Atp6v0a1 PE=1 SV=1|V-type proton ATPase 116 kDa subunit a isoform 1 OS=Mus musculus GN=Atp6v0a1 PE=1 SV=3|Isoform A1-I of V-type proton ATPase 116 kDa subunit a isoform 1 OS=Mus musculus GN=Atp6v0a1|Isoform A1-III of V-type proton ATPase 116 kDa subunit a isoform 1 OS=Mus musculus GN=Atp6v0a1	8.08746	0.192488	1.14273		26.2174	3.49964	0.0152426	0.041382	-3.78485	0.337457	0.836815	1	0.0152426	0.041382
Pik3c2a	F8VPL2|Q61194|Q61194-2	F8VPL2	Phosphatidylinositol 4-phosphate 3-kinase C2 domain-containing subunit alpha OS=Mus musculus GN=Pik3c2a PE=1 SV=1|Phosphatidylinositol 4-phosphate 3-kinase C2 domain-containing subunit alpha OS=Mus musculus GN=Pik3c2a PE=1 SV=2|Isoform 2 of Phosphatidylinositol 4-phosphate 3-kinase C2 domain-containing subunit alpha OS=Mus musculus GN=Pik3c2a	7.2253	0.192277	1.14257		27.3026	2.97175	0.0282905	0.0646227	-4.46792	0.415351	0.863232	1	0.0282905	0.0646227
Kdm5a	E9Q8F1|Q3UXZ9	Q3UXZ9	Lysine-specific demethylase 5A OS=Mus musculus GN=Kdm5a PE=1 SV=2|Lysine-specific demethylase 5A OS=Mus musculus GN=Kdm5a PE=1 SV=2	6.64461	0.192116	1.14244		24.6871	2.96991	0.0283536	0.0647416	-4.47036	0.41564	0.863315	1	0.0283536	0.0647416
Phldb1	D3Z0X5|D3Z4N0|E9PWB1|Q6PDH0|Q6PDH0-2	D3Z0X5	Pleckstrin homology-like domain family B member 1 OS=Mus musculus GN=Phldb1 PE=1 SV=1|Pleckstrin homology-like domain family B member 1 OS=Mus musculus GN=Phldb1 PE=1 SV=1|Pleckstrin homology-like domain family B member 1 OS=Mus musculus GN=Phldb1 PE=1 SV=1|Pleckstrin homology-like domain family B member 1 OS=Mus musculus GN=Phldb1 PE=1 SV=1|Isoform 2 of Pleckstrin homology-like domain family B m…	7.28134	0.19211	1.14243		27.0485	2.87047	0.0320105	0.0706245	-4.60287	0.431425	0.867654	1	0.0320105	0.0706245
Tab2	Q99K90	Q99K90	TGF-beta-activated kinase 1 and MAP3K7-binding protein 2 OS=Mus musculus GN=Tab2 PE=1 SV=1	6.14823	0.191574	1.14201		22.618	2.49045	0.0515508	0.0998743	-5.11731	0.494862	0.882628	1	0.0515508	0.0998743
Gm10488|XMR	Q4KL05|Q62478	Q4KL05	Predicted gene, ENSMUSG00000073257 OS=Mus musculus GN=Gm10488 PE=2 SV=1|Predicted gene, ENSMUSG00000073257 OS=Mus musculus GN=XMR PE=2 SV=1	6.37183	0.191488	1.14194		21.7604	2.16916	0.0781874	0.136196	-5.55701	0.552154	0.89351	1	0.0781874	0.136196
Kdelc1	Q9JHP7	Q9JHP7	KDEL motif-containing protein 1 OS=Mus musculus GN=Kdelc1 PE=1 SV=1	7.3449	0.191468	1.14192		25.5641	3.00742	0.0270959	0.0627813	-4.42066	0.409775	0.861629	1	0.0270959	0.0627813
Trim32	Q3TLR3|Q8CH72	Q3TLR3	E3 ubiquitin-protein ligase TRIM32 OS=Mus musculus GN=Trim32 PE=1 SV=1|E3 ubiquitin-protein ligase TRIM32 OS=Mus musculus GN=Trim32 PE=1 SV=2	7.39789	0.191354	1.14183		26.4055	3.41671	0.0167495	0.0444362	-3.88968	0.349031	0.841367	1	0.0167495	0.0444362
Fam83d	Q9D7I8	Q9D7I8	Protein FAM83D OS=Mus musculus GN=Fam83d PE=2 SV=1	6.96422	0.191109	1.14164		25.2031	2.6194	0.0437586	0.0886448	-4.94158	0.472794	0.877819	1	0.0437586	0.0886448
Ghitm	Q91VC9	Q91VC9	Growth hormone-inducible transmembrane protein OS=Mus musculus GN=Ghitm PE=1 SV=1	7.11182	0.190876	1.14146		24.4836	2.67226	0.0409416	0.084169	-4.86985	0.463907	0.875769	1	0.0409416	0.084169
Seh1l	Q8R2U0|Q8R2U0-2	Q8R2U0	Nucleoporin SEH1 OS=Mus musculus GN=Seh1l PE=2 SV=1|Isoform 2 of Nucleoporin SEH1 OS=Mus musculus GN=Seh1l	7.95931	0.19068	1.1413		26.3265	2.31603	0.064546	0.118091	-5.35597	0.525565	0.888722	1	0.064546	0.118091
Smpd4	Q6ZPR5|Q6ZPR5-4	Q6ZPR5	Sphingomyelin phosphodiesterase 4 OS=Mus musculus GN=Smpd4 PE=1 SV=2|Isoform 4 of Sphingomyelin phosphodiesterase 4 OS=Mus musculus GN=Smpd4	7.41545	0.190644	1.14127		26.5055	2.70548	0.0392722	0.0814566	-4.82487	0.45837	0.874457	1	0.0392722	0.0814566
Map3k1	F8VQ72|P53349	F8VQ72	Mitogen-activated protein kinase kinase kinase 1 OS=Mus musculus GN=Map3k1 PE=1 SV=1|Mitogen-activated protein kinase kinase kinase 1 OS=Mus musculus GN=Map3k1 PE=1 SV=3	6.31845	0.190545	1.14119		22.6781	2.55341	0.047574	0.0943373	-5.0314	0.484019	0.880313	1	0.047574	0.0943373
Rnasel	B2RQP1|Q05921|S4R1J5|S4R2R4	B2RQP1	2-5A-dependent ribonuclease OS=Mus musculus GN=Rnasel PE=1 SV=1|2-5A-dependent ribonuclease OS=Mus musculus GN=Rnasel PE=1 SV=2|2-5A-dependent ribonuclease (Fragment) OS=Mus musculus GN=Rnasel PE=1 SV=1|2-5A-dependent ribonuclease (Fragment) OS=Mus musculus GN=Rnasel PE=1 SV=1	6.83161	0.190497	1.14116		23.1917	2.76013	0.0366848	0.0775599	-4.75107	0.449342	0.872257	1	0.0366848	0.0775599
Cmss1	Q9CZT6	Q9CZT6	Protein CMSS1 OS=Mus musculus GN=Cmss1 PE=2 SV=1	7.07757	0.190438	1.14111		24.6678	3.55079	0.0143893	0.0396764	-3.72068	0.330443	0.833926	1	0.0143893	0.0396764
Tor2a	H3BK73|Q8R1J9	H3BK73	Prosalusin (Fragment) OS=Mus musculus GN=Tor2a PE=1 SV=1|Torsin-2A OS=Mus musculus GN=Tor2a PE=1 SV=1	6.81569	0.190333	1.14103		22.2661	2.39953	0.0579354	0.108663	-5.24163	0.510746	0.885862	1	0.0579354	0.108663
Gpc1	Q3U379|Q9QZF2	Q3U379	Glypican 1, isoform CRA_c OS=Mus musculus GN=Gpc1 PE=1 SV=1|Glypican-1 OS=Mus musculus GN=Gpc1 PE=1 SV=1	6.32621	0.190251	1.14096		22.4637	2.77333	0.036088	0.0767398	-4.73327	0.447176	0.871717	1	0.036088	0.0767398
Uap1	A0A0R4J085|Q3UHZ7|Q91YN5|Q91YN5-3	Q91YN5	UDP-N-acetylhexosamine pyrophosphorylase OS=Mus musculus GN=Uap1 PE=1 SV=1|UDP-N-acetylhexosamine pyrophosphorylase OS=Mus musculus GN=Uap1 PE=1 SV=1|UDP-N-acetylhexosamine pyrophosphorylase OS=Mus musculus GN=Uap1 PE=1 SV=1|Isoform 3 of UDP-N-acetylhexosamine pyrophosphorylase OS=Mus musculus GN=Uap1	7.47813	0.190225	1.14094		26.9075	1.55638	0.176045	0.256892	-6.37281	0.669684	0.910527	1	0.176045	0.256892
Vars2	F6YJY2|Q3U2A8	F6YJY2	Valine--tRNA ligase, mitochondrial (Fragment) OS=Mus musculus GN=Vars2 PE=1 SV=1|Valine--tRNA ligase, mitochondrial OS=Mus musculus GN=Vars2 PE=1 SV=2	6.84659	0.190203	1.14092		25.0734	2.72269	0.0384365	0.0801231	-4.8016	0.455516	0.87377	1	0.0384365	0.0801231
Ppp1ca	P62137	P62137	Serine/threonine-protein phosphatase PP1-alpha catalytic subunit OS=Mus musculus GN=Ppp1ca PE=1 SV=1	7.75189	0.189598	1.14045		24.9456	0.98738	0.365609	0.456928	-7.02526	0.786678	0.922806	1	0.365609	0.456928
Atxn3	Q546X9|Q9CVD2	Q546X9	Ataxin 3 OS=Mus musculus GN=Atxn3 PE=1 SV=1|Ataxin-3 OS=Mus musculus GN=Atxn3 PE=1 SV=2	6.72403	0.189499	1.14037		22.1195	2.60747	0.0444234	0.0896482	-4.95781	0.474813	0.878275	1	0.0444234	0.0896482
Gatad1	Q920S3	Q920S3	GATA zinc finger domain-containing protein 1 OS=Mus musculus GN=Gatad1 PE=2 SV=2	6.10726	0.189278	1.14019		22.0827	1.86867	0.116303	0.18692	-5.96439	0.608527	0.902412	1	0.116303	0.18692
Cdca7l	Q922M5	Q922M5	Cell division cycle-associated 7-like protein OS=Mus musculus GN=Cdca7l PE=1 SV=1	6.78459	0.18926	1.14018		24.1836	1.40912	0.2137	0.299232	-6.55595	0.699334	0.913994	1	0.2137	0.299232
Mlkl	Q9D2Y4-2	Q9D2Y4	Isoform 2 of Mixed lineage kinase domain-like protein OS=Mus musculus GN=Mlkl	7.30802	0.18925	1.14017		25.9438	3.29312	0.0193145	0.0491565	-4.04768	0.366739	0.847862	1	0.0193145	0.0491565
Ide	F6RPJ9	Q8CGB9	Insulin-degrading enzyme (Fragment) OS=Mus musculus GN=Ide PE=1 SV=1	7.99552	0.189136	1.14008		27.6724	2.99295	0.0275735	0.0637103	-4.43981	0.412031	0.862282	1	0.0275735	0.0637103
Etfdh	Q6PF96|Q921G7	Q6PF96	Electron transfer flavoprotein-ubiquinone oxidoreductase, mitochondrial OS=Mus musculus GN=Etfdh PE=1 SV=1|Electron transfer flavoprotein-ubiquinone oxidoreductase, mitochondrial OS=Mus musculus GN=Etfdh PE=1 SV=1	8.07743	0.189066	1.14003		26.7434	2.48341	0.0520166	0.10052	-5.12691	0.496081	0.882883	1	0.0520166	0.10052
Snapc4	A2AIV6|Q8BP86|Q8BP86-2|Q8BP86-3	A2AIV6	snRNA-activating protein complex subunit 4 OS=Mus musculus GN=Snapc4 PE=1 SV=1|snRNA-activating protein complex subunit 4 OS=Mus musculus GN=Snapc4 PE=1 SV=2|Isoform 2 of snRNA-activating protein complex subunit 4 OS=Mus musculus GN=Snapc4|Isoform 3 of snRNA-activating protein complex subunit 4 OS=Mus musculus GN=Snapc4	6.16128	0.188986	1.13996		23.1613	2.17979	0.0771045	0.134753	-5.54247	0.550206	0.893173	1	0.0771045	0.134753
Cdk9	Q99J95	Q99J95	Cyclin-dependent kinase 9 OS=Mus musculus GN=Cdk9 PE=1 SV=1	7.31359	0.188856	1.13986		25.447	1.14469	0.300526	0.391944	-6.86172	0.753716	0.919701	1	0.300526	0.391944
Atf7ip	A0A087WR75|Q7TT18	Q7TT18	Activating transcription factor 7-interacting protein 1 (Fragment) OS=Mus musculus GN=Atf7ip PE=1 SV=2|Activating transcription factor 7-interacting protein 1 OS=Mus musculus GN=Atf7ip PE=1 SV=1	6.537	0.188845	1.13985		24.2496	2.91363	0.0303631	0.0679956	-4.54523	0.424531	0.865793	1	0.0303631	0.0679956
Tacc2	E9Q9Z4|E9QL08|Q9JJG0|Q9JJG0-2	E9Q9Z4	Transforming acidic coiled-coil-containing protein 2 OS=Mus musculus GN=Tacc2 PE=1 SV=1|Transforming acidic coiled-coil-containing protein 2 OS=Mus musculus GN=Tacc2 PE=1 SV=1|Transforming acidic coiled-coil-containing protein 2 OS=Mus musculus GN=Tacc2 PE=1 SV=2|Isoform 2 of Transforming acidic coiled-coil-containing protein 2 OS=Mus musculus GN=Tacc2	7.19868	0.188451	1.13954		25.5175	3.27088	0.0198214	0.0501522	-4.07635	0.369986	0.848995	1	0.0198214	0.0501522
Carnmt1	Q80UY1	Q80UY1	Carnosine N-methyltransferase OS=Mus musculus GN=Carnmt1 PE=1 SV=1	7.48005	0.18799	1.13918		25.0603	2.79368	0.0351889	0.0753512	-4.70588	0.44385	0.87088	1	0.0351889	0.0753512
Nr3c1	P06537|P06537-2	P06537	Glucocorticoid receptor OS=Mus musculus GN=Nr3c1 PE=1 SV=1|Isoform 2 of Glucocorticoid receptor OS=Mus musculus GN=Nr3c1	7.30357	0.187733	1.13897		26.1026	2.98968	0.0276829	0.0638363	-4.44415	0.412542	0.862429	1	0.0276829	0.0638363
Adnp2	Q8CHC8	Q8CHC8	ADNP homeobox protein 2 OS=Mus musculus GN=Adnp2 PE=2 SV=2	6.59808	0.187663	1.13892		22.7828	3.10675	0.0240529	0.0575884	-4.28983	0.394483	0.857032	1	0.0240529	0.0575884
Mylk	B1B1A8|Q6PDN3|Q6PDN3-3	B1B1A8	Myosin light chain kinase, smooth muscle OS=Mus musculus GN=Mylk PE=1 SV=1|Myosin light chain kinase, smooth muscle OS=Mus musculus GN=Mylk PE=1 SV=3|Isoform 3 of Myosin light chain kinase, smooth muscle OS=Mus musculus GN=Mylk	8.0911	0.187571	1.13885		27.4446	2.17796	0.0772903	0.135024	-5.54498	0.550542	0.893231	1	0.0772903	0.135024
Vrk2	Q8BN21|Q8BN21-2	Q8BN21	Serine/threonine-protein kinase VRK2 OS=Mus musculus GN=Vrk2 PE=1 SV=2|Isoform 2 of Serine/threonine-protein kinase VRK2 OS=Mus musculus GN=Vrk2	6.52641	0.18749	1.13878		22.379	2.83365	0.0334934	0.0728755	-4.65219	0.437357	0.869214	1	0.0334934	0.0728755
Snx17	Q8BVL3	Q8BVL3	Sorting nexin-17 OS=Mus musculus GN=Snx17 PE=1 SV=2	7.01581	0.187267	1.1386		24.8659	2.21942	0.0732062	0.129526	-5.48827	0.542981	0.891905	1	0.0732062	0.129526
Tmed3	Q78IS1	Q78IS1	Transmembrane emp24 domain-containing protein 3 OS=Mus musculus GN=Tmed3 PE=1 SV=1	7.05633	0.18726	1.1386		24.0957	3.30952	0.0189501	0.048505	-4.02659	0.364357	0.847019	1	0.0189501	0.048505
Wdr44	Q6NVE8	Q6NVE8	WD repeat-containing protein 44 OS=Mus musculus GN=Wdr44 PE=1 SV=1	7.35818	0.187253	1.13859		26.1004	3.12485	0.0235403	0.0566407	-4.26612	0.391734	0.856173	1	0.0235403	0.0566407
Tmem186	Q78HW2|Q9CR76	Q78HW2	RIKEN cDNA 4432406C05 OS=Mus musculus GN=Tmem186 PE=1 SV=2|Transmembrane protein 186 OS=Mus musculus GN=Tmem186 PE=1 SV=2	6.86047	0.187252	1.13859		23.5934	2.24562	0.0707429	0.126407	-5.4524	0.53823	0.891055	1	0.0707429	0.126407
Kank1	E9Q238	E9Q238	Protein Kank1 OS=Mus musculus GN=Kank1 PE=1 SV=1	6.79449	0.187149	1.13851		23.6368	3.01147	0.0269637	0.0625245	-4.4153	0.409144	0.861445	1	0.0269637	0.0625245
Cdc42bpa	D3YYN8|E9PVY0|H7BX44|Q3UU96	D3YYN8	Serine/threonine-protein kinase MRCK alpha OS=Mus musculus GN=Cdc42bpa PE=1 SV=1|Serine/threonine-protein kinase MRCK alpha OS=Mus musculus GN=Cdc42bpa PE=1 SV=1|Serine/threonine-protein kinase MRCK alpha OS=Mus musculus GN=Cdc42bpa PE=1 SV=1|Serine/threonine-protein kinase MRCK alpha OS=Mus musculus GN=Cdc42bpa PE=1 SV=2	6.35698	0.187024	1.13841		23.4114	2.6805	0.0405205	0.0834508	-4.85869	0.462531	0.875446	1	0.0405205	0.0834508
Rsf1	E9PWW9	E9PWW9	Protein Rsf1 OS=Mus musculus GN=Rsf1 PE=1 SV=2	7.47723	0.186686	1.13815		27.1887	2.84279	0.0331182	0.0722738	-4.63993	0.43588	0.868829	1	0.0331182	0.0722738
Aox1	G3X8P9|O54754	G3X8P9	Aldehyde oxidase 1 OS=Mus musculus GN=Aox1 PE=1 SV=1|Aldehyde oxidase 1 OS=Mus musculus GN=Aox1 PE=1 SV=2	6.76731	0.186395	1.13792		23.7043	2.55879	0.0472501	0.0937908	-5.02407	0.483099	0.880113	1	0.0472501	0.0937908
Gmpr	Q9DCZ1	Q9DCZ1	GMP reductase 1 OS=Mus musculus GN=Gmpr PE=1 SV=1	7.01188	0.186156	1.13773		23.9337	2.38739	0.0588501	0.109917	-5.25825	0.512887	0.886284	1	0.0588501	0.109917
Pccb	Q99MN9	Q99MN9	Propionyl-CoA carboxylase beta chain, mitochondrial OS=Mus musculus GN=Pccb PE=1 SV=2	7.22547	0.185998	1.1376		26.0603	3.16943	0.0223285	0.0546586	-4.20789	0.385014	0.854029	1	0.0223285	0.0546586
Pex10	B1AUE5	B1AUE5	Peroxisome biogenesis factor 10 OS=Mus musculus GN=Pex10 PE=2 SV=1	6.7082	0.185941	1.13756		23.9187	3.36717	0.0177289	0.04642	-3.95276	0.356063	0.844012	1	0.0177289	0.04642
Naga	Q9QWR8	Q9QWR8	Alpha-N-acetylgalactosaminidase OS=Mus musculus GN=Naga PE=1 SV=2	6.99063	0.185871	1.1375		24.5578	1.80586	0.126425	0.199334	-6.04818	0.620628	0.904133	1	0.126425	0.199334
Vps13d	B1ART1|B1ART2	B1ART1	Protein Vps13d OS=Mus musculus GN=Vps13d PE=1 SV=1|Protein Vps13d OS=Mus musculus GN=Vps13d PE=1 SV=2	6.61134	0.185663	1.13734		23.8441	2.97367	0.0282244	0.0645296	-4.46536	0.415048	0.863146	1	0.0282244	0.0645296
H1f0	P10922	P10922	Histone H1.0 OS=Mus musculus GN=H1f0 PE=2 SV=4	8.32099	0.185555	1.13725		25.2932	2.0103	0.0963938	0.160693	-5.77343	0.581638	0.898359	1	0.0963938	0.160693
L3hypdh	Q9CXA2	Q9CXA2	Trans-L-3-hydroxyproline dehydratase OS=Mus musculus GN=L3hypdh PE=1 SV=1	7.28476	0.185492	1.1372		25.4893	1.52772	0.182839	0.264331	-6.40904	0.675415	0.911219	1	0.182839	0.264331
Gnpda2	Q9CRC9|Q9CRC9-2	Q9CRC9	Glucosamine-6-phosphate isomerase 2 OS=Mus musculus GN=Gnpda2 PE=1 SV=1|Isoform 2 of Glucosamine-6-phosphate isomerase 2 OS=Mus musculus GN=Gnpda2	6.93676	0.185097	1.13689		24.0193	2.39677	0.0581419	0.108908	-5.24541	0.511232	0.885958	1	0.0581419	0.108908
Ufc1	M0QWS4|Q9CR09	M0QWS4	Ubiquitin-fold modifier conjugating enzyme 1, isoform CRA_c OS=Mus musculus GN=Ufc1 PE=1 SV=1|Ubiquitin-fold modifier-conjugating enzyme 1 OS=Mus musculus GN=Ufc1 PE=1 SV=1	6.86518	0.185049	1.13686		22.9823	2.36943	0.0602309	0.111813	-5.28283	0.516062	0.886904	1	0.0602309	0.111813
Ntan1	Q64311	Q64311	Protein N-terminal asparagine amidohydrolase OS=Mus musculus GN=Ntan1 PE=1 SV=3	7.2696	0.184925	1.13676		25.2389	2.19124	0.0759563	0.133107	-5.52681	0.548114	0.892809	1	0.0759563	0.133107
Faim	A0A087WRH2|D3Z3C1|Q9WUD8	Q9WUD8	Fas apoptotic inhibitory molecule 1 (Fragment) OS=Mus musculus GN=Faim PE=1 SV=5|Fas apoptotic inhibitory molecule 1 OS=Mus musculus GN=Faim PE=1 SV=2|Fas apoptotic inhibitory molecule 1 OS=Mus musculus GN=Faim PE=1 SV=1	7.5813	0.184769	1.13663		25.9066	2.70468	0.0393116	0.0815093	-4.82596	0.458503	0.874489	1	0.0393116	0.0815093
Atp6v1d	P57746|Q3U861	P57746	V-type proton ATPase subunit D OS=Mus musculus GN=Atp6v1d PE=1 SV=1|ATPase, H+ transporting, lysosomal V1 subunit D, isoform CRA_b OS=Mus musculus GN=Atp6v1d PE=1 SV=1	7.31168	0.184743	1.13661		24.5566	2.27067	0.0684687	0.12352	-5.4181	0.533706	0.890233	1	0.0684687	0.12352
Daxx	G3UX50|O35613|Q3UKR0	G3UX50	Death domain-associated protein 6 OS=Mus musculus GN=Daxx PE=1 SV=1|Death domain-associated protein 6 OS=Mus musculus GN=Daxx PE=1 SV=1|Death domain-associated protein 6 OS=Mus musculus GN=Daxx PE=1 SV=1	6.68027	0.18446	1.13639		23.113	2.45803	0.0537365	0.103079	-5.16161	0.500496	0.883796	1	0.0537365	0.103079
Rad54l2	E9QKL0|Q99NG0	E9QKL0	Helicase ARIP4 OS=Mus musculus GN=Rad54l2 PE=1 SV=1|Helicase ARIP4 OS=Mus musculus GN=Rad54l2 PE=1 SV=1	5.83464	0.184409	1.13635		20.9741	1.66221	0.15301	0.231661	-6.23696	0.648685	0.907897	1	0.15301	0.231661
Vrk3	Q3TAR6|Q8K3G5	Q3TAR6	Inactive serine/threonine-protein kinase VRK3 OS=Mus musculus GN=Vrk3 PE=1 SV=1|Inactive serine/threonine-protein kinase VRK3 OS=Mus musculus GN=Vrk3 PE=1 SV=2	6.69549	0.184399	1.13634		23.7635	2.66439	0.041348	0.084794	-4.88051	0.465224	0.876077	1	0.041348	0.084794
Vps16	G3X8X7	G3X8X7	Vacuolar protein sorting 16 (Yeast) OS=Mus musculus GN=Vps16 PE=1 SV=1	7.11338	0.184333	1.13629		25.5197	2.5775	0.0461413	0.0921148	-4.99858	0.479905	0.879411	1	0.0461413	0.0921148
Setd2	E9Q5F9|E9Q5F9-2	E9Q5F9	Histone-lysine N-methyltransferase SETD2 OS=Mus musculus GN=Setd2 PE=1 SV=1|Isoform 2 of Histone-lysine N-methyltransferase SETD2 OS=Mus musculus GN=Setd2	6.98761	0.184302	1.13627		26.4086	2.78279	0.035667	0.0761228	-4.72054	0.445628	0.871329	1	0.035667	0.0761228
Vps72	Q62481	Q62481	Vacuolar protein sorting-associated protein 72 homolog OS=Mus musculus GN=Vps72 PE=2 SV=2	6.54547	0.184007	1.13603		22.6412	3.07353	0.0250262	0.0592533	-4.33345	0.399558	0.858591	1	0.0250262	0.0592533
Timmdc1	Q8BUY5	Q8BUY5	Complex I assembly factor TIMMDC1, mitochondrial OS=Mus musculus GN=Timmdc1 PE=1 SV=1	7.34033	0.183861	1.13592		24.8313	2.76451	0.0364859	0.0773034	-4.74517	0.448624	0.872078	1	0.0364859	0.0773034
Pak4	Q8BTW9	Q8BTW9	Serine/threonine-protein kinase PAK 4 OS=Mus musculus GN=Pak4 PE=1 SV=1	6.70014	0.1838	1.13587		23.7224	2.46859	0.0530133	0.102062	-5.14716	0.498656	0.883417	1	0.0530133	0.102062
Maea	Q4VC33|Q4VC33-2	Q4VC33	Macrophage erythroblast attacher OS=Mus musculus GN=Maea PE=1 SV=1|Isoform 2 of Macrophage erythroblast attacher OS=Mus musculus GN=Maea	7.31693	0.183584	1.1357		25.4219	2.3104	0.0650198	0.118362	-5.36368	0.526572	0.888911	1	0.0650198	0.118362
Ciz1	A2AN61|Q8VEH2	A2AN61	CDKN1A interacting zinc finger protein 1, isoform CRA_d OS=Mus musculus GN=Ciz1 PE=1 SV=1|CDKN1A interacting zinc finger protein 1 OS=Mus musculus GN=Ciz1 PE=1 SV=1	6.97684	0.183561	1.13568		25.1289	3.11625	0.0237823	0.0570961	-4.27738	0.393039	0.856582	1	0.0237823	0.0570961
Pars2	A8Y5T6|Q8CFI5	A8Y5T6	Probable proline--tRNA ligase, mitochondrial OS=Mus musculus GN=Pars2 PE=1 SV=1|Probable proline--tRNA ligase, mitochondrial OS=Mus musculus GN=Pars2 PE=1 SV=2	6.36597	0.183419	1.13557		22.8394	2.80967	0.0344998	0.0744234	-4.68439	0.441247	0.870217	1	0.0344998	0.0744234
Dusp3	B1AQF4|Q9D7X3	B1AQF4	Dual-specificity protein phosphatase 3 OS=Mus musculus GN=Dusp3 PE=1 SV=1|Dual specificity protein phosphatase 3 OS=Mus musculus GN=Dusp3 PE=1 SV=1	7.08447	0.183416	1.13557		23.385	3.36073	0.0178608	0.0466611	-3.96098	0.356983	0.844351	1	0.0178608	0.0466611
Tomm34	Q9CYG7	Q9CYG7	Mitochondrial import receptor subunit TOM34 OS=Mus musculus GN=Tomm34 PE=1 SV=1	8.02524	0.182841	1.13512		26.6214	2.77397	0.0360594	0.0767069	-4.73241	0.447071	0.871691	1	0.0360594	0.0767069
Etv3	Q8R4Z4	Q8R4Z4	ETS translocation variant 3 OS=Mus musculus GN=Etv3 PE=1 SV=2	6.61421	0.182445	1.13481		23.0812	1.59855	0.16649	0.24729	-6.31906	0.661285	0.909493	1	0.16649	0.24729
Kifc5b	E9PUA5	E9PUA5	Kinesin-like protein OS=Mus musculus GN=Kifc5b PE=1 SV=1	6.90236	0.182431	1.13479		23.651	2.73433	0.0378822	0.0792801	-4.78587	0.453591	0.873302	1	0.0378822	0.0792801
Sgsm3	F6VZH1|F8WIA4|Q8VCZ6	F6VZH1	Small G protein-signaling modulator 3 (Fragment) OS=Mus musculus GN=Sgsm3 PE=1 SV=1|Small G protein-signaling modulator 3 OS=Mus musculus GN=Sgsm3 PE=1 SV=1|Small G protein signaling modulator 3 OS=Mus musculus GN=Sgsm3 PE=1 SV=1	6.2579	0.182367	1.13474		22.2428	1.20002	0.280117	0.36997	-6.80065	0.742225	0.918559	1	0.280117	0.36997
Zdhhc20	Q5Y5T1|Q5Y5T1-2	Q5Y5T1	Probable palmitoyltransferase ZDHHC20 OS=Mus musculus GN=Zdhhc20 PE=1 SV=1|Isoform 2 of Probable palmitoyltransferase ZDHHC20 OS=Mus musculus GN=Zdhhc20	6.56885	0.182224	1.13463		23.2008	0.834688	0.43925	0.529319	-7.16762	0.819043	0.925629	1	0.43925	0.529319
Taok3	Q8BYC6	Q8BYC6	Serine/threonine-protein kinase TAO3 OS=Mus musculus GN=Taok3 PE=1 SV=2	6.94513	0.181791	1.13429		24.795	2.75682	0.036836	0.0777056	-4.75553	0.449885	0.872391	1	0.036836	0.0777056
Etv6	E9Q8J8|P97360	E9Q8J8	Transcription factor ETV6 OS=Mus musculus GN=Etv6 PE=1 SV=1|Transcription factor ETV6 OS=Mus musculus GN=Etv6 PE=1 SV=1	7.13616	0.181759	1.13427		24.9384	1.28342	0.251663	0.340031	-6.70552	0.725013	0.916787	1	0.251663	0.340031
Dnaja2	Q9QYJ0	Q9QYJ0	DnaJ homolog subfamily A member 2 OS=Mus musculus GN=Dnaja2 PE=1 SV=1	8.16064	0.181725	1.13424		26.1235	2.21901	0.073245	0.129526	-5.48882	0.543055	0.891918	1	0.073245	0.129526
Znf451	Q8C0P7	Q8C0P7	E3 SUMO-protein ligase ZNF451 OS=Mus musculus GN=Znf451 PE=1 SV=1	6.99185	0.181706	1.13422		25.9671	3.19028	0.0217857	0.053639	-4.18074	0.381894	0.853012	1	0.0217857	0.053639
Cul1	Q9WTX6	Q9WTX6	Cullin-1 OS=Mus musculus GN=Cul1 PE=1 SV=1	8.00997	0.181627	1.13416		27.5381	3.23261	0.0207283	0.0517806	-4.12581	0.375611	0.850919	1	0.0207283	0.0517806
Lsm11	Q5SUH5|Q8BUV6	Q5SUH5	U7 snRNA-associated Sm-like protein LSm11 OS=Mus musculus GN=Lsm11 PE=1 SV=1|U7 snRNA-associated Sm-like protein LSm11 OS=Mus musculus GN=Lsm11 PE=1 SV=1	6.64693	0.181522	1.13408		21.7897	2.92533	0.0299329	0.067434	-4.52964	0.422674	0.865283	1	0.0299329	0.067434
Ssfa2	A2AQD5|Q922B9	A2AQD5	Sperm-specific antigen 2 homolog OS=Mus musculus GN=Ssfa2 PE=1 SV=1|Sperm-specific antigen 2 homolog OS=Mus musculus GN=Ssfa2 PE=1 SV=3	6.67734	0.181353	1.13395		24.361	1.9953	0.0983249	0.163164	-5.79376	0.584458	0.8988	1	0.0983249	0.163164
Alg2	Q9DBE8	Q9DBE8	Alpha-1,3/1,6-mannosyltransferase ALG2 OS=Mus musculus GN=Alg2 PE=1 SV=2	7.48091	0.18074	1.13346		25.6127	2.03687	0.0930664	0.156491	-5.73736	0.576655	0.897571	1	0.0930664	0.156491
Chuk	E9Q605|E9QNL4|Q60680	E9Q605	Inhibitor of nuclear factor kappa-B kinase subunit alpha OS=Mus musculus GN=Chuk PE=1 SV=1|Inhibitor of nuclear factor kappa-B kinase subunit alpha OS=Mus musculus GN=Chuk PE=1 SV=1|Inhibitor of nuclear factor kappa-B kinase subunit alpha OS=Mus musculus GN=Chuk PE=1 SV=1	7.4343	0.180679	1.13342		26.0036	2.83145	0.0335844	0.0729899	-4.65515	0.437713	0.869307	1	0.0335844	0.0729899
Frmd4b	Q6ZQ04|Q920B0|Q920B0-2	Q6ZQ04	FERM domain-containing protein 4B (Fragment) OS=Mus musculus GN=Frmd4b PE=1 SV=1|FERM domain-containing protein 4B OS=Mus musculus GN=Frmd4b PE=1 SV=2|Isoform 2 of FERM domain-containing protein 4B OS=Mus musculus GN=Frmd4b	6.62218	0.180677	1.13342		22.8232	2.17322	0.0777719	0.135513	-5.55145	0.551409	0.893381	1	0.0777719	0.135513
Mcts1	Q9DB27|Q9DB27-2	Q9DB27	Malignant T-cell-amplified sequence 1 OS=Mus musculus GN=Mcts1 PE=1 SV=1|Isoform 2 of Malignant T-cell-amplified sequence 1 OS=Mus musculus GN=Mcts1	7.70718	0.180318	1.13313		24.9389	3.22932	0.0208085	0.0519364	-4.13007	0.376098	0.851084	1	0.0208085	0.0519364
Bet1l	O35153	O35153	BET1-like protein OS=Mus musculus GN=Bet1l PE=1 SV=1	6.81105	0.180212	1.13305		22.7448	2.75063	0.0371208	0.0780233	-4.76387	0.450903	0.872643	1	0.0371208	0.0780233
Llgl1	A0A0R4J0S4|Q80Y17	Q80Y17	Lethal(2) giant larvae protein homolog 1 OS=Mus musculus GN=Llgl1 PE=1 SV=1|Lethal(2) giant larvae protein homolog 1 OS=Mus musculus GN=Llgl1 PE=1 SV=1	7.55272	0.17974	1.13268		26.6344	2.9776	0.0280905	0.0643512	-4.46015	0.414433	0.862971	1	0.0280905	0.0643512
Acsl5	Q3UC67|Q8JZR0	Q3UC67	Acyl-CoA synthetase long-chain family member 5, isoform CRA_b OS=Mus musculus GN=Acsl5 PE=1 SV=1|Long-chain-fatty-acid--CoA ligase 5 OS=Mus musculus GN=Acsl5 PE=1 SV=1	7.45894	0.179691	1.13264		26.5603	2.56938	0.0466189	0.0928229	-5.00964	0.481289	0.879716	1	0.0466189	0.0928229
Trim41	Q5NCC2|Q5NCC3	Q5NCC2	E3 ubiquitin-protein ligase TRIM41 (Fragment) OS=Mus musculus GN=Trim41 PE=1 SV=1|E3 ubiquitin-protein ligase TRIM41 OS=Mus musculus GN=Trim41 PE=1 SV=1	6.45017	0.17962	1.13259		22.9237	1.90274	0.111159	0.180438	-5.91868	0.602008	0.90146	1	0.111159	0.180438
Sf3a2	D3YW09|G3UVU2	D3YW09	Splicing factor 3A subunit 2 OS=Mus musculus GN=Sf3a2 PE=1 SV=1|Splicing factor 3A subunit 2 OS=Mus musculus GN=Sf3a2 PE=1 SV=1	7.65675	0.179494	1.13249		24.9751	1.89471	0.11235	0.181772	-5.92947	0.603542	0.901685	1	0.11235	0.181772
Snx12	Q3TGS7|Q3V2H3|Q6ZWQ5	Q3TGS7	Sorting nexin 12, isoform CRA_b OS=Mus musculus GN=Snx12 PE=1 SV=1|Sorting nexin-12 OS=Mus musculus GN=Snx12 PE=1 SV=1|Sorting nexin 12, isoform CRA_c OS=Mus musculus GN=Snx12 PE=1 SV=1	7.68618	0.179462	1.13246		25.5889	3.24008	0.0205476	0.0513954	-4.11613	0.374508	0.850546	1	0.0205476	0.0513954
Mtmr14	Q8VEL2	Q8VEL2	Myotubularin-related protein 14 OS=Mus musculus GN=Mtmr14 PE=1 SV=2	6.95268	0.179415	1.13242		24.1592	1.71411	0.142821	0.219475	-6.16928	0.638489	0.906564	1	0.142821	0.219475
Clock	A0A0J9YU61|O08785|O08785-2	O08785	Circadian locomoter output cycles protein kaput OS=Mus musculus GN=Clock PE=1 SV=1|Circadian locomoter output cycles protein kaput OS=Mus musculus GN=Clock PE=1 SV=1|Isoform Short of Circadian locomoter output cycles protein kaput OS=Mus musculus GN=Clock	6.14236	0.17931	1.13234		21.8261	2.9791	0.0280394	0.0643118	-4.45816	0.414197	0.862904	1	0.0280394	0.0643118
Scarb2	O35114	O35114	Lysosome membrane protein 2 OS=Mus musculus GN=Scarb2 PE=1 SV=3	7.22342	0.179269	1.13231		24.5546	2.03803	0.0929243	0.156343	-5.73579	0.576439	0.897536	1	0.0929243	0.156343
Add3	Q9QYB5-2	Q9QYB5	Isoform 1 of Gamma-adducin OS=Mus musculus GN=Add3	7.83986	0.179182	1.13224		27.0528	3.11052	0.0239451	0.0573776	-4.28489	0.39391	0.856854	1	0.0239451	0.0573776
Vcpip1	A0A0R4J0M9|Q8CDG3	Q8CDG3	Deubiquitinating protein VCIP135 OS=Mus musculus GN=Vcpip1 PE=1 SV=1|Deubiquitinating protein VCIP135 OS=Mus musculus GN=Vcpip1 PE=1 SV=1	7.26842	0.179055	1.13214		26.2387	2.08531	0.0873025	0.148603	-5.67144	0.567623	0.89611	1	0.0873025	0.148603
Sec24c	G3X972	G3X972	Protein Sec24c OS=Mus musculus GN=Sec24c PE=1 SV=1	7.90273	0.17902	1.13211		26.9173	3.02574	0.0265039	0.0617292	-4.39644	0.406928	0.860795	1	0.0265039	0.0617292
Osbpl2	Q8BX94	Q8BX94	Oxysterol-binding protein-related protein 2 OS=Mus musculus GN=Osbpl2 PE=1 SV=1	7.10963	0.178905	1.13202		22.7212	3.21902	0.0210613	0.0523877	-4.14342	0.377621	0.851595	1	0.0210613	0.0523877
Rps6ka1	E9PWV3|F6Q8A4|F6RQA2|P18653|Q505N6	E9PWV3	Ribosomal protein S6 kinase OS=Mus musculus GN=Rps6ka1 PE=1 SV=1|Ribosomal protein S6 kinase alpha-1 (Fragment) OS=Mus musculus GN=Rps6ka1 PE=1 SV=1|Ribosomal protein S6 kinase OS=Mus musculus GN=Rps6ka1 PE=1 SV=1|Ribosomal protein S6 kinase alpha-1 OS=Mus musculus GN=Rps6ka1 PE=1 SV=1|Ribosomal protein S6 kinase OS=Mus musculus GN=Rps6ka1 PE=1 SV=1	6.93053	0.17884	1.13197		24.7534	1.8145	0.124982	0.197755	-6.0367	0.618957	0.903899	1	0.124982	0.197755
Znf532|Zfp532	Q6NXK2|S4R2I9	Q6NXK2	Zinc finger protein 532 OS=Mus musculus GN=Znf532 PE=1 SV=1|Zinc finger protein 532 OS=Mus musculus GN=Zfp532 PE=1 SV=1	6.77927	0.17876	1.13191		24.7478	2.80773	0.0345825	0.074525	-4.68699	0.441561	0.870298	1	0.0345825	0.074525
Btaf1	E9QAE3	E9QAE3	Protein Btaf1 OS=Mus musculus GN=Btaf1 PE=1 SV=1	7.81209	0.178725	1.13188		27.4599	2.96674	0.0284628	0.0648635	-4.47457	0.416137	0.863456	1	0.0284628	0.0648635
Insr	P15208	P15208	Insulin receptor OS=Mus musculus GN=Insr PE=1 SV=2	6.7412	0.178686	1.13185		24.9556	2.83691	0.0333589	0.07269	-4.64782	0.43683	0.869077	1	0.0333589	0.07269
Ranbp10	A0A0R4J0G4|Q6VN19	Q6VN19	Ran-binding protein 10 OS=Mus musculus GN=Ranbp10 PE=1 SV=1|Ran-binding protein 10 OS=Mus musculus GN=Ranbp10 PE=1 SV=2	7.16184	0.178681	1.13185		25.4253	3.28902	0.0194069	0.049327	-4.05297	0.367337	0.848072	1	0.0194069	0.049327
Nkap	Q9D0F4	Q9D0F4	NF-kappa-B-activating protein OS=Mus musculus GN=Nkap PE=2 SV=1	6.83733	0.178672	1.13184		23.8884	2.83029	0.0336325	0.0730126	-4.6567	0.437901	0.869355	1	0.0336325	0.0730126
Gmppa	Q922H4	Q922H4	Mannose-1-phosphate guanyltransferase alpha OS=Mus musculus GN=Gmppa PE=1 SV=1	7.4547	0.1786	1.13179		24.6067	2.83363	0.0334942	0.0728755	-4.65222	0.43736	0.869215	1	0.0334942	0.0728755
Ddx50	Q99MJ9	Q99MJ9	ATP-dependent RNA helicase DDX50 OS=Mus musculus GN=Ddx50 PE=2 SV=1	7.58327	0.178431	1.13165		26.0137	1.88563	0.113714	0.183535	-5.94167	0.605279	0.90194	1	0.113714	0.183535
Exoc5	Q3TPX4	Q3TPX4	Exocyst complex component 5 OS=Mus musculus GN=Exoc5 PE=1 SV=2	7.49526	0.178332	1.13157		26.552	2.7519	0.0370622	0.078013	-4.76216	0.450695	0.872591	1	0.0370622	0.078013
Ssh2	Q5SW75|Q5SW75-4	Q5SW75	Protein phosphatase Slingshot homolog 2 OS=Mus musculus GN=Ssh2 PE=1 SV=2|Isoform 4 of Protein phosphatase Slingshot homolog 2 OS=Mus musculus GN=Ssh2	6.02972	0.178123	1.13141		22.5352	2.31423	0.0646967	0.118255	-5.35843	0.525886	0.888782	1	0.0646967	0.118255
Abcc1	A5D6P3|O35379	A5D6P3	ATP-binding cassette, sub-family C (CFTR/MRP), member 1 OS=Mus musculus GN=Abcc1 PE=1 SV=1|Multidrug resistance-associated protein 1 OS=Mus musculus GN=Abcc1 PE=1 SV=1	7.29188	0.178097	1.13139		25.9773	2.10145	0.0854655	0.146075	-5.64945	0.56463	0.895617	1	0.0854655	0.146075
Samd1	D3YXK1	D3YXK1	Atherin OS=Mus musculus GN=Samd1 PE=1 SV=1	6.41133	0.1778	1.13116		22.6667	2.47084	0.0528611	0.10187	-5.1441	0.498266	0.883336	1	0.0528611	0.10187
Slmap	D3Z7V3|H7BX64|Q3URD3|Q3URD3-2	D3Z7V3	Sarcolemmal membrane-associated protein OS=Mus musculus GN=Slmap PE=1 SV=1|Sarcolemmal membrane-associated protein OS=Mus musculus GN=Slmap PE=1 SV=1|Sarcolemmal membrane-associated protein OS=Mus musculus GN=Slmap PE=1 SV=2|Isoform 2 of Sarcolemmal membrane-associated protein OS=Mus musculus GN=Slmap	6.85326	0.177779	1.13114		24.6923	2.59667	0.0450341	0.0905663	-4.97249	0.476644	0.878686	1	0.0450341	0.0905663
Ddx49	Q4FZF3	Q4FZF3	Probable ATP-dependent RNA helicase DDX49 OS=Mus musculus GN=Ddx49 PE=2 SV=1	7.46276	0.177757	1.13112		25.609	3.14988	0.0228512	0.0554645	-4.2334	0.387953	0.854974	1	0.0228512	0.0554645
Vamp4	O70480|Q8BSN6	O70480	Vesicle-associated membrane protein 4 OS=Mus musculus GN=Vamp4 PE=1 SV=1|Vesicle-associated membrane protein 4 OS=Mus musculus GN=Vamp4 PE=1 SV=1	7.24742	0.177714	1.13109		24.7584	2.84161	0.0331667	0.0723525	-4.64153	0.436072	0.868879	1	0.0331667	0.0723525
Alkbh8	Q80Y20|Q80Y20-2	Q80Y20	Alkylated DNA repair protein alkB homolog 8 OS=Mus musculus GN=Alkbh8 PE=1 SV=1|Isoform 2 of Alkylated DNA repair protein alkB homolog 8 OS=Mus musculus GN=Alkbh8	6.46912	0.177414	1.13086		23.6561	3.11603	0.0237884	0.0570961	-4.27766	0.393072	0.856592	1	0.0237884	0.0570961
Zfp57	Q8C6P8|Q8C6P8-2	Q8C6P8	Zinc finger protein 57 OS=Mus musculus GN=Zfp57 PE=1 SV=1|Isoform 2 of Zinc finger protein 57 OS=Mus musculus GN=Zfp57	6.89983	0.177032	1.13056		24.7022	2.69726	0.0396784	0.0821527	-4.836	0.459737	0.874784	1	0.0396784	0.0821527
Sptlc2	P97363|Q542D6	P97363	Serine palmitoyltransferase 2 OS=Mus musculus GN=Sptlc2 PE=1 SV=2|Serine palmitoyltransferase 2 OS=Mus musculus GN=Sptlc2 PE=1 SV=1	7.42106	0.176951	1.13049		26.0721	3.25415	0.0202123	0.050885	-4.09795	0.372438	0.84984	1	0.0202123	0.050885
Nr2c1	Q505F1	Q505F1	Nuclear receptor subfamily 2 group C member 1 OS=Mus musculus GN=Nr2c1 PE=1 SV=3	6.27343	0.176897	1.13045		22.599	2.38198	0.0592621	0.110544	-5.26565	0.513841	0.886471	1	0.0592621	0.110544
Ndst1	Q3UHN9	Q3UHN9	Bifunctional heparan sulfate N-deacetylase/N-sulfotransferase 1 OS=Mus musculus GN=Ndst1 PE=1 SV=2	6.1764	0.176797	1.13037		22.9681	1.86338	0.117123	0.187818	-5.97148	0.609543	0.902559	1	0.117123	0.187818
Ebna1bp2	Q9D903	Q9D903	Probable rRNA-processing protein EBP2 OS=Mus musculus GN=Ebna1bp2 PE=2 SV=1	7.76072	0.176569	1.13019		26.2401	1.72687	0.140419	0.216584	-6.15253	0.635991	0.906231	1	0.140419	0.216584
Taf9	Q8VI33	Q8VI33	Transcription initiation factor TFIID subunit 9 OS=Mus musculus GN=Taf9 PE=1 SV=1	6.52637	0.17616	1.12987		23.4587	2.92953	0.0297801	0.0672856	-4.52405	0.422009	0.865099	1	0.0297801	0.0672856
A2AG58|A2AG58-2	A2AG58|A2AG58-2	A2AG58	Uncharacterized protein CXorf23 homolog OS=Mus musculus PE=1 SV=1|Isoform 2 of Uncharacterized protein CXorf23 homolog OS=Mus musculus	6.36425	0.17603	1.12977		24.2178	2.56326	0.0469825	0.0933872	-5.01798	0.482334	0.879946	1	0.0469825	0.0933872
Taok2	Q6ZQ29|Q6ZQ29-2	Q6ZQ29	Serine/threonine-protein kinase TAO2 OS=Mus musculus GN=Taok2 PE=1 SV=3|Isoform 2 of Serine/threonine-protein kinase TAO2 OS=Mus musculus GN=Taok2	6.89509	0.176026	1.12977		25.2226	2.70298	0.0393954	0.0816539	-4.82826	0.458786	0.874557	1	0.0393954	0.0816539
Braf	F6SZ47|P28028	P28028	Serine/threonine-protein kinase B-raf (Fragment) OS=Mus musculus GN=Braf PE=1 SV=1|Serine/threonine-protein kinase B-raf OS=Mus musculus GN=Braf PE=1 SV=3	7.39112	0.175484	1.12934		25.8755	3.09575	0.0243705	0.058205	-4.30426	0.396159	0.857551	1	0.0243705	0.058205
Adprhl2	Q8CG72	Q8CG72	Poly(ADP-ribose) glycohydrolase ARH3 OS=Mus musculus GN=Adprhl2 PE=1 SV=1	7.72453	0.17544	1.12931		24.7202	2.9196	0.0301425	0.0676839	-4.53726	0.423582	0.865533	1	0.0301425	0.0676839
Ralgps2	Q9ERD6|Q9ERD6-2|Q9ERD6-3	Q9ERD6	Ras-specific guanine nucleotide-releasing factor RalGPS2 OS=Mus musculus GN=Ralgps2 PE=1 SV=2|Isoform 2 of Ras-specific guanine nucleotide-releasing factor RalGPS2 OS=Mus musculus GN=Ralgps2|Isoform 3 of Ras-specific guanine nucleotide-releasing factor RalGPS2 OS=Mus musculus GN=Ralgps2	6.9631	0.175395	1.12927		24.6619	1.7253	0.140712	0.21698	-6.1546	0.636298	0.906272	1	0.140712	0.21698
Lsm1	Q544C9|Q8VC85	Q544C9	MCG14522 OS=Mus musculus GN=Lsm1 PE=1 SV=1|U6 snRNA-associated Sm-like protein LSm1 OS=Mus musculus GN=Lsm1 PE=1 SV=1	7.13207	0.175246	1.12916		25.0067	3.23933	0.0205657	0.0514186	-4.11711	0.374619	0.850584	1	0.0205657	0.0514186
Nat2	P50295|Q78ZC4	P50295	Arylamine N-acetyltransferase 2 OS=Mus musculus GN=Nat2 PE=1 SV=1|Arylamine N-acetyltransferase 2 OS=Mus musculus GN=Nat2 PE=1 SV=1	6.27777	0.175032	1.12899		22.7725	3.03247	0.0262901	0.0614775	-4.38755	0.405885	0.860488	1	0.0262901	0.0614775
D6Wsu163e	Q91YN0	Q91YN0	Protein C12orf4 homolog OS=Mus musculus GN=D6Wsu163e PE=1 SV=1	6.60823	0.175029	1.12899		24.0439	2.92391	0.0299846	0.0674503	-4.53153	0.422899	0.865345	1	0.0299846	0.0674503
[truncated: 4,326 more rows]
